# Supplementary material for: Regioselective ortho halogenation of N-aryl amides and ureas via oxidative halodeboronation: harnessing boron reactivity for efficient C–halogen bond installation
Source: PubMed Central journal article supplement (PMC10685333; doi:10.1039/d3sc04628a), 2023-10-23

---

## Regioselective *Ortho* Halogenation of N-Aryl Amides and Ureas via Oxidative Halodeboronation: Harnessing Boron Reactivity for Efficient C-Halogen Bond Installation

Ganesh H. Shinde,<sup>a†</sup> Ganesh S. Ghotekar,<sup>a†</sup> Francoise M. Amombo Noa,<sup>b</sup> Lars Öhrström,<sup>b</sup> Per-Ola Norrby<sup>c</sup> and Henrik Sundén<sup>ab\*</sup>

<sup>a</sup> Department of Chemistry and Molecular Biology, University of Gothenburg, SE-412 96 Gothenburg, Sweden.

<sup>b</sup> Department of Chemistry and Chemical Engineering, Chalmers University of Technology, SE-41296 Gothenburg, Sweden.

<sup>c</sup> Data Science and Modelling, Pharmaceutical Sciences, R&D, AstraZeneca Gothenburg, Pepparedsleden 1, Mölndal SE-43183, Sweden.

† Equal contributors

\* Corresponding author Email: [henrik.sunden@chem.gu.se](mailto:henrik.sunden@chem.gu.se)

## Supporting Information

---

## Table of Contents

|                                                                               |    |
|-------------------------------------------------------------------------------|----|
| 1. General information .....                                                  | 3  |
| 2. Experimental section.....                                                  | 4  |
| 3. Optimization table S1 .....                                                | 9  |
| 4. Metal-free electrophilic deborylative halogenation of N-heteroarenes ..... | 10 |
| 5. Applications .....                                                         | 34 |
| 6. Synthesis of difluoro boracycle (4a).....                                  | 39 |
| 7. Gram scale experiment .....                                                | 42 |
| 8. Computational details .....                                                | 43 |
| 9. Single crystal X-ray diffraction .....                                     | 66 |
| 10. Reference .....                                                           | 68 |
| 11. NMR spectra .....                                                         | 70 |

---

## 1. General information

**Experimental procedures, reagents, and glassware:** All reactions were carried out in dry glassware under a nitrogen atmosphere using standard Schlenk techniques. 5 mL and 3 mL screw-top V-Vial, (sigma Aldrich, Product code-Z115150-12EA) were used for the final reactions. Acetonitrile was obtained from the SPS machine prior to use and anhydrous dichloromethane was purchased from Sigma Aldrich. All reagents were used as received from commercial suppliers unless otherwise stated. Reported yields of final compounds are calculated based on the amide starting material without consideration of dibromoborane complex formation.

**Chromatography:** Reaction progress was monitored by thin-layer chromatography (TLC) performed on aluminum plates coated with silica gel 60 F254 (Art 5715, 0.25 mm). Chromatograms were visualized with UV light at 254 nm or by staining using potassium permanganate. Column chromatography was performed on automated column chromatography Biotage Isolera™ Spektra One with (Biotage® Sfar Silica D and HC-10g) columns. Purifications were usually done by gradient elution using binary mixtures of pentane and ethyl acetate and UV detection at 254 nm and 280 nm.

**Melting Points (MP):** Melting points performed on solids were recorded on a Büchi M560 and are uncorrected.

**Infrared Spectroscopy:** Infrared (IR) spectra were recorded on a Bruker Invenio R FTIR spectrophotometer,  $\nu_{\text{max}}$  in  $\text{cm}^{-1}$ . Samples were recorded as thin films of solids. Bands are characterised as broad (br), strong (s), medium (m), and weak (w).

**Mass Spectrometry:** High-resolution mass spectrometry measurements were performed by CMSI service at the Chalmers University of Technology. An Agilent 6520 equipped with an electrospray interface was operated in the positive ionization mode.

**NMR Spectroscopy:** All  $^1\text{H}$ -NMR,  $^{13}\text{C}$ -NMR, and  $^{19}\text{F}$ -NMR spectra were recorded using Varian AV-400, AV-500 spectrometers and Bruker spectrometer at 300K.  $^{11}\text{B}$  NMR was recorded on a 600 MHz Bruker spectrometer using a BBO room temperature 5 mm probe. Chemical shifts are given in parts per million (ppm,  $\delta$ ), referenced to the solvent peak of  $\text{CDCl}_3$ , defined at  $\delta = 7.26$  ppm ( $^1\text{H}$ -NMR) and  $\delta = 77.16$  ppm ( $^{13}\text{C}$ -NMR);  $(\text{CD}_3)_2\text{SO}$  defined at  $\delta = 2.50$  ppm ( $^1\text{H}$ -NMR),  $\delta = 39.52$  ppm ( $^{13}\text{C}$ -NMR). Coupling constants are quoted in Hz ( $J$ ).  $^1\text{H}$ ,  $^{13}\text{C}$ ,  $^{19}\text{F}$ , and  $^{11}\text{B}$  NMR splitting patterns are designated as singlet (s), doublet (d), triplet (t), quartet (q), bs (broad singlet) as they appeared in the spectrum. Splitting patterns that could not be interpreted or easily visualized are designated as multiplet (m). Urea starting materials<sup>(6)</sup> and compound 6z<sup>(7)</sup> were synthesized according to literature protocol.

## 2. Experimental section

### 2.1 General procedure A for the preparation of amide<sup>(1)</sup>

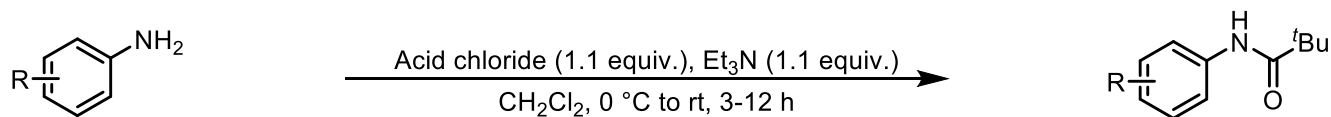

Procedure adapted from the literature.<sup>(1)</sup>

To a stirred solution of amine (3.0 mmol, 1 equiv.) and triethylamine (3.3 mmol, 1.1 equiv.) in 10 mL of anhydrous CH<sub>2</sub>Cl<sub>2</sub> was added dropwise acid chloride (3.3 mmol, 1.1 equiv., in 5 mL anhydrous CH<sub>2</sub>Cl<sub>2</sub>) over a 5 min while maintaining the internal temperature below 5°C. Then the mixture was stirred at room temperature for 3-12 h. Completion of reaction was monitored by TLC. The mixture was diluted with additional 10 mL dichloromethane and washed with 20 mL 1M HCl followed by saturated NaHCO<sub>3</sub> (aq.) (2×20.0 mL) of and saturated NaCl (aq.), dried over sodium sulfate, and concentrated *in vacuo*. The crude product was washed with pentane to afford the analytical pure amides.

### 2.2 General procedure B for the preparation of Benzamide derivatives (6a-6m, 6v, 6y)

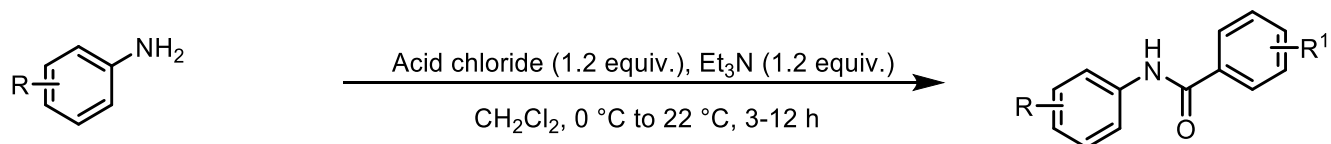

Procedure adapted from the literature.<sup>(2,3)</sup>

To a stirred solution of amine (3.0 mmol, 1 equiv.) and triethylamine (3.6 mmol, 1.2 equiv.) in 10 mL of anhydrous CH<sub>2</sub>Cl<sub>2</sub> was added dropwise acid chloride (3.6 mmol, 1.2 equiv., in 5 mL anhydrous CH<sub>2</sub>Cl<sub>2</sub>) over a 5 min while maintaining the internal temperature below 5°C. Then the mixture was stirred at room temperature for 3-12 h. Completion of reaction was monitored by TLC. The mixture was diluted with additional 10 mL dichloromethane and washed with 20 mL water followed by saturated NH<sub>4</sub>Cl (20 mL), 2×20.0 mL of saturated NaHCO<sub>3</sub> (aq.), and saturated NaCl (aq.), dried over sodium sulfate, and concentrated *in vacuo* to afford the analytical pure amides. A pentane wash was given if the compounds contained any impurity after the evaporation step.

### 2.3 General procedure C for the preparation of Benzamide derivatives (6s, 6t, 6u, 6w)

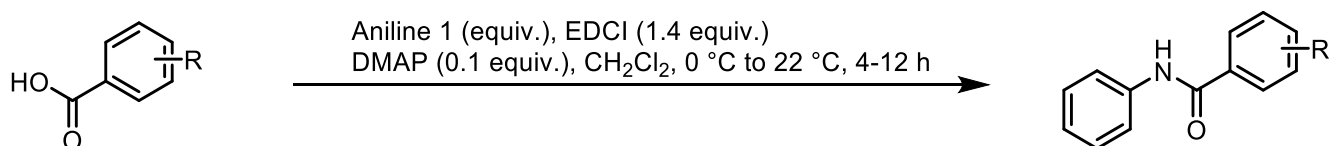

Procedure adapted from the literature.<sup>(4)</sup>

To a stirred solution of aniline (1.61 mmol, 1 equiv.) acid (1.85 mmol, 1.15 equiv.) in 15 mL of anhydrous CH<sub>2</sub>Cl<sub>2</sub> at 0 °C were added EDCI (2.25 mmol, 1.4 equiv.), DMAP (0.161 mmol, 0.1 equiv.) and the reaction mixture stirred at 22 °C for 4-12 h. Completion of reaction was monitored by TLC. The mixture



was diluted with additional 10 mL dichloromethane and then washed with 20 mL water followed by 2×20.0 mL of saturated NaHCO<sub>3</sub> (aq.), saturated NH<sub>4</sub>Cl (20 mL) and saturated NaCl (aq.), dried over sodium sulfate, and concentrated *in vacuo* to afford a crude gummy liquid which upon a pentane wash gives analytically pure amides.

## 2.4 Synthesis of N-([1,1':4',1''-terphenyl]-3-yl)pivalamide (1v)

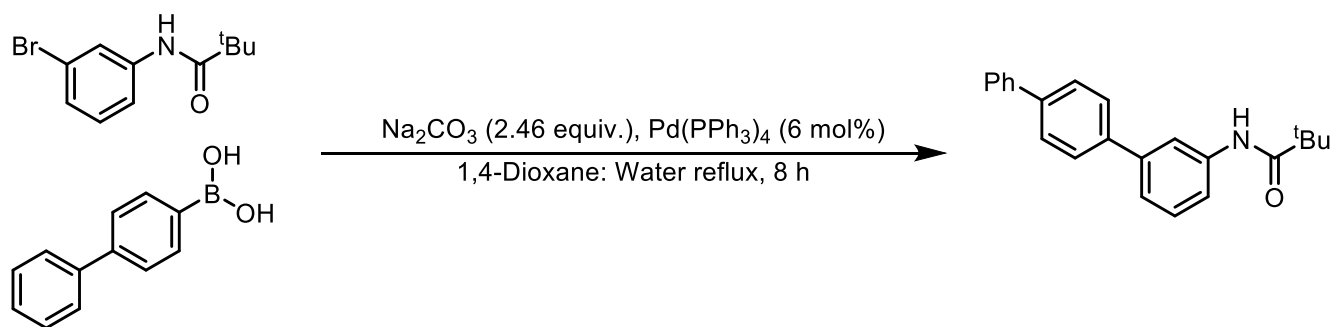

Procedure adapted from the literature.<sup>(5)</sup>

To a solution of N-(3-bromophenyl)pivalamide (2.0 mmol) in degassed dimethoxyethane (DME) (6 mL), was added Pd(PPh<sub>3</sub>)<sub>4</sub> (0.06 mmol) and stirred at room temperature for 20 min. Then [1,1'-biphenyl]-4-ylboronic acid (2.4 mmol) and 2 M Na<sub>2</sub>CO<sub>3</sub> solution (2 mL) were added and the reaction mixture was stirred at 80 °C under nitrogen. After completion of the reaction (TLC monitoring) DME was partially evaporated under reduced pressure, the mixture was poured on ice-water and extracted with dichloromethane (3×15 mL), separated and dried over sodium sulfate, and concentrated *in vacuo* to afford the crude product, which was purified by automated column chromatography using pentane/EtOAc.

## 2.5 Spectral data

### N-(3,5-dichlorophenyl)pivalamide (1r):

Following the general procedure A, using 3,5-dichloroaniline (486 mg, 3.0 mmol, 1 equiv.), pivaloyl chloride (3.3 mmol, 1.1 equiv.), triethyl amine (3.3 mmol, 1.1 equiv.) at room temperature for 3 h. The desired product was obtained as an off white solid (657 mg, 89%) **Rf**: 0.34 (hexane/EtOAc, 90:10); **Mp**: 159-161 °C; **<sup>1</sup>H NMR (400 MHz, CDCl<sub>3</sub>)** δ= 7.49 (d, *J* = 1.8 Hz, 2H), 7.47 (bs, 1H), 7.06 (t, *J* = 1.8 Hz, 1H), 1.29 (s, 9H); **<sup>13</sup>C{<sup>1</sup>H} NMR (101 MHz, CDCl<sub>3</sub>)** δ= 177.1, 139.9, 135.2, 124.2, 118.5, 39.9, 27.6; **IR (neat, cm<sup>-1</sup>)** = 3305 (br), 2970 (w), 2932 (br), 1661 (m), 1584 (s), 1527 (m), 1444 (m), 1404 (m), 1172 (m), 796 (m), 671 (m); **HRMS (ESI) (m/z)**: calculated for [M+H]<sup>+</sup> C<sub>11</sub>H<sub>14</sub>Cl<sub>2</sub>NO<sup>+</sup> 246.0452; found 246.0452.

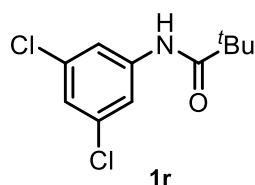

### *N*-([1,1':4',1''-terphenyl]-3-yl)pivalamide (**1v**):

Following the general procedure 2.1.4, the desired product was obtained as a pale yellow solid (381 mg, 58%); **Rf**: 0.6 (hexane/EtOAc, 70:30); **Mp**: 196-198 °C; **<sup>1</sup>H NMR (400 MHz, CDCl<sub>3</sub>)**  $\delta$  = 7.91 (bs, 1H),

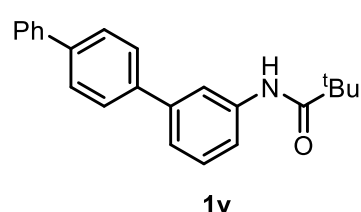

7.73 – 7.63 (m, 6H), 7.52 – 7.43 (m, 4H), 7.42 – 7.35 (m, 3H), 1.36 (s, 9H);

**<sup>13</sup>C{<sup>1</sup>H} NMR (101 MHz, CDCl<sub>3</sub>)**  $\delta$  = 176.9, 141.7, 140.8, 140.4, 139.7, 138.6, 129.5, 128.9, 127.7, 127.6, 127.5, 127.2, 123.0, 119.0, 118.8, 39.8, 27.8; **IR (neat, cm<sup>-1</sup>)** = 3345 (br), 2969 (w), 2924 (w), 1699 (s), 1538 (m),

1521 (s), 761 (w), 686 (m), 669 (s); **HRMS (ESI) (m/z)**: calculated for

[M+H]<sup>+</sup> C<sub>23</sub>H<sub>24</sub>NO<sup>+</sup> 330.1868; found 330.1858.

### *N*-(4-tritylphenyl)pivalamide (**1w**):

Following the general procedure A, using 4-tritylaniline (337 mg, 1.0 mmol, 1 equiv.), pivaloyl chloride (1.1 mmol, 1.1 equiv.), triethyl amine (1.1 mmol, 1.1 equiv.) at room temperature for 3 h. The desired

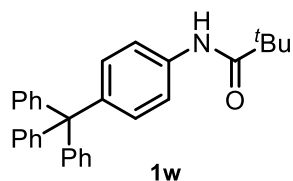

product was obtained as an off white solid (392 mg, 93%); **Rf**: 0.53

(hexane/EtOAc, 80:20); **Mp**: 252-254 °C; **<sup>1</sup>H NMR (400 MHz, CDCl<sub>3</sub>)**  $\delta$  = 7.41 (d, *J* = 8.8 Hz, 2H), 7.30 (bs, 1H), 7.29 – 7.13 (m, 17H), 1.30 (s, 9H); **<sup>13</sup>C{<sup>1</sup>H} NMR (101 MHz, CDCl<sub>3</sub>)**  $\delta$  = 176.7, 146.9, 142.9, 135.9, 131.8, 131.2, 127.6,

126.1, 119.1, 64.7, 39.7, 27.8; **IR (neat, cm<sup>-1</sup>)** = 3271 (br), 2960 (w), 2922 (w), 1645 (s), 1594 (m), 1510 (s), 1404 (m), 1320 (m), 1254 (m), 1189 (m), 826 (m), 753 (m), 700 (s), 631 (w); **HRMS (ESI) (m/z)**: calculated for [M+H]<sup>+</sup> C<sub>30</sub>H<sub>29</sub>NO<sup>+</sup> 420.2327; found 420.2329.

### *N*-(3,4-dihydro-2*H*-benzo[*b*][1,4]dioxepin-7-yl)pivalamide (**1y**):

Following the general procedure A, using 3,4-dihydro-2*H*-benzo[*b*][1,4]dioxepin-7-amine (496 mg, 3 mmol, 1 equiv.), pivaloyl chloride (3.3 mmol, 1.1 equiv.), triethyl amine (3.3 mmol, 1.1 equiv.) at room

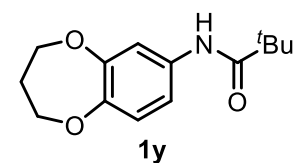

temperature for 3 h. The desired product was obtained as an off white solid (718 mg, 96%); **Rf**: 0.23 (hexane/EtOAc, 80:20); **Mp**: 147-149 °C; **<sup>1</sup>H NMR (400 MHz, CDCl<sub>3</sub>)**  $\delta$  = 7.25 (bs, 1H), 7.20 (d, *J* = 2.6 Hz, 1H), 7.04 (dd, *J* = 8.6, 2.6

Hz, 1H), 6.90 (d, *J* = 8.7 Hz, 1H), 4.15 (dt, *J* = 9.7, 5.6 Hz, 4H), 2.19 – 2.12 (m,

2H), 1.28 (s, 9H); **<sup>13</sup>C{<sup>1</sup>H} NMR (101 MHz, CDCl<sub>3</sub>)**  $\delta$  = 176.5, 151.5, 148.0, 133.5, 121.7, 115.5, 114.0, 70.9, 70.8, 39.6, 32.1, 27.7; **IR (neat, cm<sup>-1</sup>)** = 2963 (w), 1653 (m), 1559 (m), 1505 (s), 1457 (m), 1305 (m), 1202 (m), 1050 (m), 668 (s); **HRMS (ESI) (m/z)**: calculated for [M+H]<sup>+</sup> C<sub>14</sub>H<sub>20</sub>NO<sub>3</sub><sup>+</sup> 250.1443; found 250.1445.

### 2-(diethylamino)ethyl 4-pivalamidobenzoate (1z):

Following the general procedure A, using 2-(diethylamino)ethyl 4-aminobenzoate hydrochloride salt (410 mg, 1.5 mmol, 1 equiv.), pivaloyl chloride (1.65 mmol, 1.1 equiv.), triethyl amine (4.5 mmol, 3 equiv.)

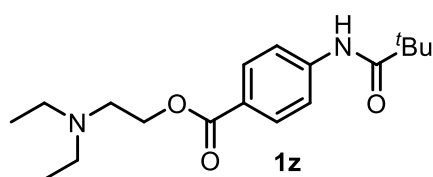

at room temperature for 12 h. The desired product was obtained as an brown solid (440 mg, 91%); **Rf**: 0.10 (EtOAc, 100); **Mp**: 86-88 °C;

**<sup>1</sup>H NMR (400 MHz, CDCl<sub>3</sub>)**  $\delta$ = 7.99 (d,  $J$  = 8.6 Hz, 2H), 7.62 (d,  $J$  = 8.8 Hz, 2H), 7.48 (bs, 1H), 4.38 (t,  $J$  = 6.3 Hz, 2H), 2.85 (t,  $J$  = 6.3 Hz, 2H), 2.63 (q,  $J$  = 7.1 Hz, 4H), 1.32 (d,  $J$  = 0.6 Hz, 9H), 1.07 (t,  $J$  = 7.1 Hz, 6H); **<sup>13</sup>C{<sup>1</sup>H} NMR (101 MHz, CDCl<sub>3</sub>)**  $\delta$ = 177.0, 166.2, 142.4, 130.9, 125.7, 119.1, 63.3, 51.0, 47.9, 39.9, 27.6, 12.1; **IR (neat, cm<sup>-1</sup>)** = 3360 (br), 2968 (w), 1716 (s), 1693 (s), 1595 (m), 1518 (s), 1403 (m), 1273 (s), 1173 (m), 1111 (m), 769 (w), 696 (w); **HRMS (ESI) (m/z)**: calculated for [M+H]<sup>+</sup> C<sub>18</sub>H<sub>29</sub>N<sub>2</sub>O<sub>3</sub><sup>+</sup> 321.2178; found 321.2179.

### 5-(4-chlorophenyl)-*N*-phenylfuran-2-carboxamide (6s):

Following the general procedure C, using, aniline (0.15 g, 1.61 mmol, 1 equiv.) 5-(4-chlorophenyl)furan-2-carboxylic acid (1.85 mmol, 1.15 equiv.), EDCI (2.25 mmol, 1.4 equiv.), DMAP (0.161 mmol, 0.1

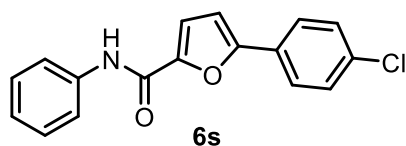

equiv.) at room temperature for 4 h. The crude product was purified by automated column chromatography (pentane/EtOAc, 80:20) and the desired product was obtained as an off white solid (422 mg, 88%); **Rf**:

0.44 (hexane/EtOAc, 80:20); **Mp**: 151-153 °C; **<sup>1</sup>H NMR (400 MHz, CDCl<sub>3</sub>)**  $\delta$ = 8.07 (bs, 1H), 7.71 – 7.65 (m, 4H), 7.43 (d,  $J$  = 2.0 Hz, 1H), 7.42 – 7.35 (m, 3H), 7.31 (d,  $J$  = 3.6 Hz, 1H), 7.20 – 7.14 (m, 1H), 6.78 (d,  $J$  = 3.6 Hz, 1H); **<sup>13</sup>C{<sup>1</sup>H} NMR (101 MHz, CDCl<sub>3</sub>)**  $\delta$ = 156.1, 154.8, 147.2, 137.4, 134.9, 129.4, 129.3, 128.1, 125.9, 124.8, 120.2, 117.7, 108.3; **IR (neat, cm<sup>-1</sup>)** = 3292 (br), 2925 (w), 1653 (s), 1601 (s), 1540 (m), 1475 (s), 1441 (s), 1325 (s), 1093 (m), 1018 (m), 799 (m), 754 (m), 692 (m); **HRMS (ESI) (m/z)**: calculated for [M+H]<sup>+</sup> C<sub>17</sub>H<sub>13</sub>ClNO<sub>2</sub><sup>+</sup> 298.0635; found 298.0640.

### *N*-phenyl-5-(3-(trifluoromethyl)phenyl)furan-2-carboxamide (6t):

Following the general procedure C, using, aniline (0.15 g, 1.61 mmol, 1 equiv.) 5-(3-(trifluoromethyl)phenyl)furan-2-carboxylic acid (1.85 mmol, 1.15 equiv.), EDCI (2.25 mmol, 1.4 equiv.),

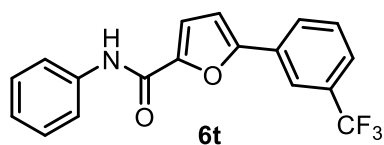

DMAP (0.161 mmol, 0.1 equiv.) at room temperature for 4 h. The crude product was purified by automated column chromatography (pentane/EtOAc, 90:10) and the desired product was obtained as an pale

yellow solid (351 mg, 85%); **Rf**: 0.60 (hexane/EtOAc, 80:20); **Mp**: 168-170 °C; **<sup>1</sup>H NMR (400 MHz, CDCl<sub>3</sub>)**  $\delta$ = 8.16 (bs, 1H), 7.97 (s, 1H), 7.91 (dd,  $J$  = 7.7, 1.7 Hz, 1H), 7.70 (dd,  $J$  = 8.6, 1.2 Hz, 2H), 7.59 (dtd,  $J$  = 15.5, 7.8, 2.0 Hz, 2H), 7.38 (ddd,  $J$  = 8.5, 7.4, 1.8 Hz, 2H), 7.33 (dd,  $J$  = 3.7, 1.9 Hz, 1H), 7.17 (tt,  $J$  = 7.4, 1.2 Hz, 1H), 6.87 (dd,  $J$  = 4.2, 1.8 Hz, 1H); **<sup>13</sup>C{<sup>1</sup>H} NMR (101 MHz, CDCl<sub>3</sub>)**  $\delta$ = 156.0,

154.2, 147.6, 137.3, 131.62 (q,  $J = 32.6$  Hz), 130.3, 129.6, 129.3, 127.8, 125.4 (q,  $J = 3.8$  Hz), 124.9, 124.0 (q,  $J = 274.7$ ) 121.4 (q,  $J = 3.8$  Hz), 120.4, 117.6, 109.1;  **$^{19}\text{F}$  NMR (470 MHz,  $\text{CDCl}_3$ )**  $\delta = -62.85$ ; **IR (neat,  $\text{cm}^{-1}$ )** = 3294 (br), 2925 (w), 1653 (m), 1601 (m), 1543 (s), 1441 (m), 1330 (s), 1167 (m), 1125 (s), 797 (m), 753 (m), 696 (m); **HRMS (ESI) (m/z)**: calculated for  $[\text{M}+\text{H}]^+$   $\text{C}_{18}\text{H}_{13}\text{F}_3\text{NO}_2^+$  332.0898; found 332.0899.

#### **N-(4-tritylphenyl)benzamide (6v):**

Following the general procedure B, using 4-tritylaniline (337 mg, 1.0 mmol, 1 equiv.), triethyl amine (1.2 mmol, 1.2 equiv.) benzoyl chloride (1.2 mmol, 1.2 equiv.), at room temperature for 3 h. The crude product

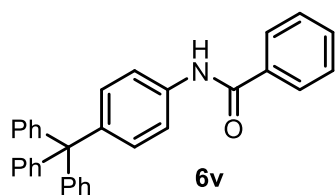

was purified by automated column chromatography (pentane/EtOAc, 75:25) and the desired product was obtained as an off white solid (410 mg, 93%); **Rf**: 0.53 (hexane/EtOAc, 70:30); **Mp**: 271-273 °C;  **$^1\text{H}$  NMR (400 MHz,  $\text{DMSO-d}_6$ )**  $\delta = 10.32$  (bs, 1H), 7.94 (d,  $J = 7.0$  Hz, 2H), 7.70 (d,  $J = 8.6$  Hz, 2H), 7.57 (d,  $J = 7.1$  Hz, 1H), 7.52 (dd,  $J = 8.2, 6.4$  Hz, 2H), 7.31 (t,  $J = 7.6$  Hz, 6H), 7.24 – 7.14 (m, 9H), 7.11 (d,  $J = 8.6$  Hz, 2H);  **$^{13}\text{C}\{^1\text{H}\}$  NMR (101 MHz,  $\text{DMSO-d}_6$ )**  $\delta = 165.6, 146.5, 141.6, 137.0, 135.0, 131.6, 130.7, 130.5, 128.4, 127.8, 127.7, 126.0, 119.6, 64.1$ ; **IR (neat,  $\text{cm}^{-1}$ )** = 3351 (br), 2921 (w), 1650 (s), 1521 (s), 1488 (m), 1321 (m), 1256 (w), 823 (w), 697 (s), 665 (s), 630 (m); **HRMS (ESI) (m/z)**: calculated for  $[\text{M}+\text{H}]^+$   $\text{C}_{32}\text{H}_{26}\text{NO}^+$  440.2014; found 440.2019.

### 3. Optimization table S1

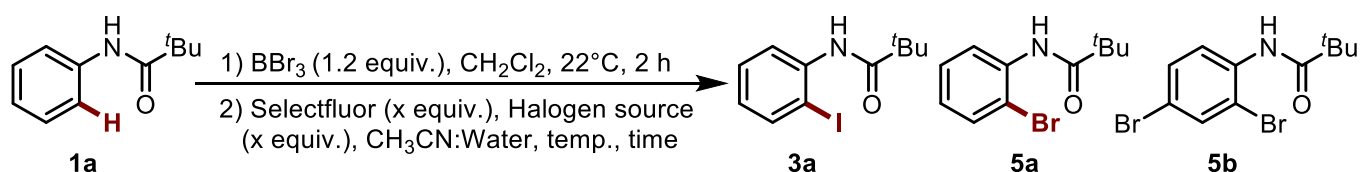

| Entry | Halogen source (equiv.) | X | Oxidant (equiv.)  | Solvent                  | Time (h) | Yield <sup>(c)</sup> 3a | NMR ratio          |       |
|-------|-------------------------|---|-------------------|--------------------------|----------|-------------------------|--------------------|-------|
|       |                         |   |                   |                          |          |                         | 5a:5b              |       |
| 1     | LiBr (2.2)              |   | Selectfluor (2)   | CH <sub>3</sub> CN:Water | 2.5      | ---                     | 1                  | 0.14  |
| 2     | NaBr (2.2)              |   | Selectfluor (2)   | CH <sub>3</sub> CN:Water | 2.5      | ---                     | 1                  | 0.15  |
| 3     | KBr (2.2)               |   | Selectfluor (2)   | CH <sub>3</sub> CN:Water | 2.5      | ---                     | 1                  | 0.21  |
| 4     | TBAB (2.2)              |   | Selectfluor (2)   | CH <sub>3</sub> CN:Water | 2.5      | ---                     | 78% <sup>(c)</sup> | trace |
| 5     | LiI (2.2)               |   | Selectfluor (2)   | CH <sub>3</sub> CN:Water | 5        | 91%                     | ----               |       |
| 6     | NaI (2.2)               |   | Selectfluor (2)   | CH <sub>3</sub> CN:Water | 5        | 84%                     | ----               |       |
| 7     | TBAI (2.2)              |   | Selectfluor (2)   | CH <sub>3</sub> CN:Water | 5        | 91%                     | ----               |       |
| 8     | KI (2.7)                |   | Selectfluor (2.5) | CH <sub>3</sub> CN:Water | 5        | 96%                     | ----               |       |

Reaction conditions for iodination: Step i) 1a (0.22 mmol), BBr<sub>3</sub> (0.26 mmol), in 0.5 mL anhydrous CH<sub>2</sub>Cl<sub>2</sub> at 22 °C, 2 h; Step ii) Selectfluor (SF) (0.44 mmol), potassium iodide (KI) (0.48 mmol) in 1.5 mL CH<sub>3</sub>CN and 1 mL water at 22 °C, 2 h then 60 °C for 5 h. <sup>c</sup>Isolated yields. <sup>d</sup>NMR ratio

Entry 1-4: Different bromine sources were investigated and the organic source of bromine TBAB provided mono bromination however a mixture of mono and dibrominated products were observed in the case of alkali metal-based bromine sources.

Entry 5-7: Similarly organic and inorganic iodine sources were investigated and the reaction worked exceptionally well provided exclusively mono iodination. Based on yield and cost we chose potassium iodide (KI) as an iodine source.

Entry 8: Excess of Selectfluor and KI were used and it was observed that 2 equivalents of Selectfluor is required for the reaction to completion.

## 4. Metal-free electrophilic deborylative halogenation of N-heteroarenes

### 4.1 General Procedure D for reaction optimization: Iodination

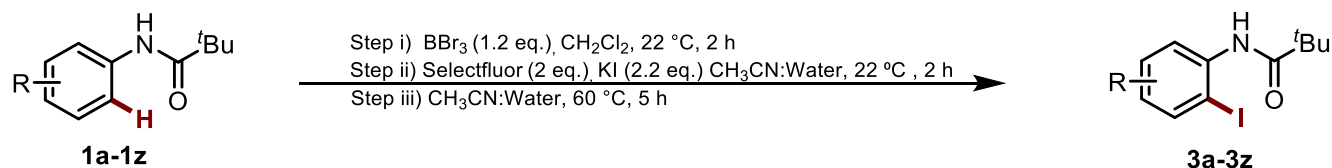

Step i) To a dry 5 mL, screw-top V-Vial, (Sigma Aldrich, Product code-Z115150-12EA), equipped with a rubber septum, stir bar, the amide derivative (0.22 mmol, 1 equiv.) in anhydrous  $\text{CH}_2\text{Cl}_2$  (0.5 mL) under a nitrogen atmosphere was added dropwise  $\text{BBr}_3$  (0.26 mmol, 1.2 equiv., 1M solution in  $\text{CH}_2\text{Cl}_2$ ). After the complete addition of  $\text{BBr}_3$ , the reaction mixture was stirred at 22 °C for 2 h after which the solvent was removed under reduced pressure.

Step ii) Simultaneously, Selectfluor (0.44 mmol, 2 equiv.), and KI (0.48 mmol, 2.2 equiv.), were dissolved in  $\text{CH}_3\text{CN}$  (1 mL) and water (1 mL) in a 3 mL, screw-top V-vial and the reaction mixture stirred at 22 °C for 2 h.

Step iii) The crude residue from step i) was dissolved in  $\text{CH}_3\text{CN}$  (0.5 mL). To this mixture, the solution from step ii) was added dropwise at 22 °C, and the reaction mixture was heated at 60 °C for 5 h. The reaction was quenched with saturated sodium thiosulfite solution at room temperature and the crude mixture was dissolved in EtOAc (10 mL) and  $\text{H}_2\text{O}$  (10 mL). The aqueous layer was washed with EtOAc (10 mL), and the combined organic layer was washed with brine, dried over sodium sulfate, filtered, and evaporated *in vacuo* to afford the crude product, which was purified using automated column chromatography (pentane/EtOAc).

### 4.2 General Procedure E for reaction optimization: Iodination of benzanilides and urea

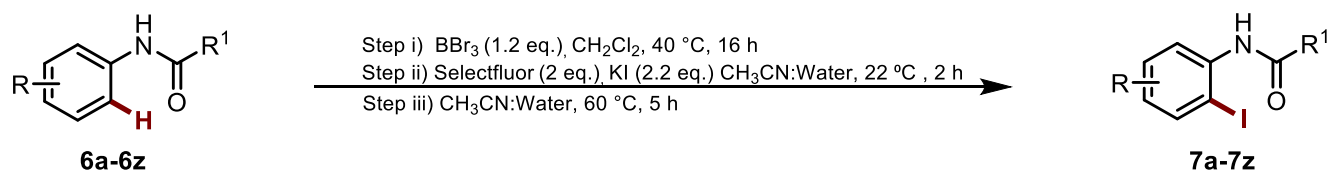

Step i) To a dry 5 mL, screw-top V-Vial, (Sigma Aldrich, Product code-Z115150-12EA), equipped with a rubber septum, stir bar, the amide derivative/urea (0.22 mmol, 1 equiv.) in anhydrous  $\text{CH}_2\text{Cl}_2$  (0.5 mL) under a nitrogen atmosphere was added dropwise  $\text{BBr}_3$  (0.26 mmol, 1.2 equiv., 1M solution in  $\text{CH}_2\text{Cl}_2$ ). After the complete addition of  $\text{BBr}_3$ , the reaction mixture was stirred at 40 °C for 16 h after which the solvent was removed under reduced pressure.

Step ii) Simultaneously, Selectfluor (0.44 mmol, 2 equiv.), and KI (0.48 mmol, 2.2 equiv.), were dissolved in the  $\text{CH}_3\text{CN}$  (1 mL) and water (1 mL) in a 3 mL, screw-top V-vial and the reaction mixture stirred at 22 °C for 2 h.

Step iii) The crude residue from step i) was dissolved in CH<sub>3</sub>CN (0.5 mL). To this mixture, the solution from step ii) was added dropwise at 22 °C, and the reaction mixture was heated at 60 °C for 5 h. The reaction was quenched with saturated sodium thiosulfite solution at room temperature and the crude mixture was dissolved in EtOAc (10 mL) and H<sub>2</sub>O (10 mL). The aqueous layer was washed with EtOAc (10 mL), and the combined organic layer was washed with brine, dried over sodium sulfate, filtered, and evaporated *in vacuo* to afford the crude product, which was purified using automated column chromatography (pentane/EtOAc).

### 4.3 Spectral data

#### *N*-(2-iodophenyl)pivalamide (**3a**):<sup>(8)</sup>

Following the general procedure D using *N*-phenylpivalamide (39 mg, 0.22 mmol, 1 equiv.), BBr<sub>3</sub> (0.26 mmol, 1.2 equiv., 1M in CH<sub>2</sub>Cl<sub>2</sub>), at 22 °C for 2 h and Selectfluor (0.44 mmol, 2 equiv.), KI (0.48 mmol, 2.2 equiv.) at 60 °C for 5 h. The crude product was purified by automated column chromatography (pentane/EtOAc, 90:10) and the desired product was obtained as an off white solid (62 mg, 93%); **Rf**: 0.66 (hexane/EtOAc, 90:10); **<sup>1</sup>H NMR (400 MHz, CDCl<sub>3</sub>)** δ= 8.28 (d, *J* = 8.2 Hz, 1H), 7.80 (bs, 1H), 7.75 (d, *J* = 7.9 Hz, 1H), 7.33 (t, *J* = 7.8 Hz, 1H), 6.82 (t, *J* = 7.6 Hz, 1H), 1.36 (s, 9H); **<sup>13</sup>C{<sup>1</sup>H} NMR (101 MHz, CDCl<sub>3</sub>)** δ= 176.8, 138.8, 138.4, 129.3, 125.8, 121.8, 90.2, 40.2, 27.8.

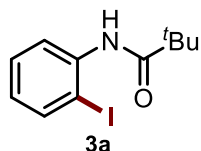

#### *N*-(2-iodo-4-methylphenyl)pivalamide (**3b**):<sup>(9)</sup>

Following the general procedure D using *N*-(*p*-tolyl)pivalamide (43 mg, 0.22 mmol, 1 equiv.), BBr<sub>3</sub> (0.26 mmol, 1.2 equiv., 1M in CH<sub>2</sub>Cl<sub>2</sub>), at 22 °C for 2 h and Selectfluor (0.44 mmol, 2 equiv.), KI (0.48 mmol, 2.2 equiv.) at 60 °C for 5 h. The crude product was purified by automated column chromatography (pentane/EtOAc, 90:10) and the desired product was obtained as an off white solid (63 mg, 90%); **Rf**: 0.63 (hexane/EtOAc, 90:10); **<sup>1</sup>H NMR (400 MHz, CDCl<sub>3</sub>)** δ= 8.12 (d, *J* = 8.3 Hz, 1H), 7.71 (bs, 1H), 7.60 (dd, *J* = 1.9, 0.9 Hz, 1H), 7.14 (dd, *J* = 8.4, 2.0 Hz, 1H), 2.27 (s, 3H), 1.36 (s, 9H); **<sup>13</sup>C{<sup>1</sup>H} NMR (101 MHz, CDCl<sub>3</sub>)** δ= 176.8, 139.0, 135.9, 135.8, 130.0, 121.7, 90.3, 40.2, 27.8, 20.5.

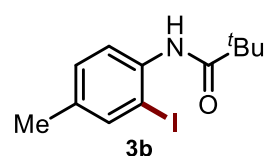

#### *N*-(4-butyl-2-iodophenyl)pivalamide (**3c**):

Following the general procedure D using *N*-(4-butylphenyl)pivalamide (51 mg, 0.22 mmol, 1 equiv.), BBr<sub>3</sub> (0.26 mmol, 1.2 equiv., 1M in CH<sub>2</sub>Cl<sub>2</sub>), at 22 °C for 2 h and Selectfluor (0.44 mmol, 2 equiv.), KI (0.48 mmol, 2.2 equiv.) at 60 °C for 5 h. The crude product was purified by automated column chromatography (pentane/EtOAc, 90:10) and the desired product was obtained as a colorless gummy liquid (71 mg, 90%); **Rf**: 0.73 (hexane/EtOAc, 90:10); **<sup>1</sup>H NMR (400 MHz, CDCl<sub>3</sub>)** δ= 8.14 (d, *J* = 8.4 Hz, 1H), 7.72 (bs, 1H), 7.59 (d, *J* = 1.9 Hz, 1H), 7.15 (dd, *J* = 8.4, 2.0 Hz, 1H), 2.52 (t, *J* = 7.7 Hz, 2H), 1.57-1.51 (m, 2H), 1.36 (s, 9H), 1.35 – 1.27 (m, 2H), 0.91 (t, *J* = 7.3 Hz, 3H); **<sup>13</sup>C{<sup>1</sup>H} NMR (101 MHz, CDCl<sub>3</sub>)**

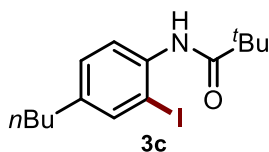

$\delta$ = 176.8, 140.9, 138.4, 136.0, 129.4, 121.7, 90.4, 40.2, 34.7, 33.6, 27.8, 22.3, 14.0; **IR** (neat,  $\text{cm}^{-1}$ ) = 3402 (br), 2956 (w), 2927 (w), 2864 (m), 1686 (s), 1569 (m), 1508 (s), 1395 (m), 1294 (m), 1156 (m), 831 (w), 665 (w), 565 (w); **HRMS (ESI) (m/z)**: calculated for  $[\text{M}+\text{H}]^+$   $\text{C}_{15}\text{H}_{23}\text{INO}^+$  360.0824; found 360.0837.

#### ***N*-(4-(*tert*-butyl)-2-iodophenyl)pivalamide (3d):**

Following the general procedure D using *N*-(4-(*tert*-butyl)phenyl)pivalamide (51 mg, 0.22 mmol, 1 equiv.),  $\text{BBr}_3$  (0.26 mmol, 1.2 equiv., 1M in  $\text{CH}_2\text{Cl}_2$ ), at 22 °C for 2 h and Selectfluor (0.44 mmol, 2

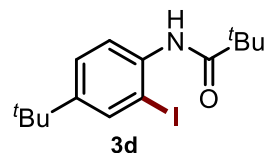

equiv.), KI (0.48 mmol, 2.2 equiv.) at 60 °C for 5 h. The crude product was purified by automated column chromatography (pentane/EtOAc, 90:10) and the desired product was obtained as a colorless gummy liquid (66 mg, 84%); **Rf**: 0.73 (hexane/EtOAc, 90:10);  **$^1\text{H}$  NMR (400 MHz,  $\text{CDCl}_3$ )**  $\delta$ = 8.16 (d,  $J$  = 8.6 Hz, 1H),

7.74 (d,  $J$  = 2.2 Hz, 1H), 7.72 (bs, 1H), 7.36 (dd,  $J$  = 8.5, 2.2 Hz, 1H), 1.36 (s, 9H), 1.28 (s, 9H);  **$^{13}\text{C}\{^1\text{H}\}$  NMR (101 MHz,  $\text{CDCl}_3$ )**  $\delta$ = 176.8, 149.2, 135.9, 135.6, 126.5, 121.5, 90.6, 40.2, 34.5, 31.4, 27.9; **IR** (neat,  $\text{cm}^{-1}$ ) = 3402 (br), 2958 (w), 2905 (w), 2868 (w), 1689 (s), 1565 (m), 1506 (s), 1476 (s), 1386 (m), 1298 (s), 1263 (m), 1165 (m), 829 (w), 709 (w), 563 (w); **HRMS (ESI) (m/z)**: calculated for  $[\text{M}+\text{H}]^+$   $\text{C}_{15}\text{H}_{23}\text{INO}^+$  360.0824; found 360.0837.

#### ***N*-(4-fluoro-2-iodophenyl)pivalamide (3e):** <sup>(10)</sup>

Following the general procedure D using *N*-(4-fluorophenyl)pivalamide (43 mg, 0.22 mmol, 1 equiv.),  $\text{BBr}_3$  (0.26 mmol, 1.2 equiv., 1M in  $\text{CH}_2\text{Cl}_2$ ), at 22 °C for 2 h and Selectfluor (0.44 mmol, 2 equiv.), KI

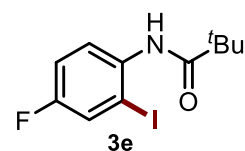

(0.48 mmol, 2.2 equiv.) at 60 °C for 5 h. The crude product was purified by automated column chromatography (pentane/EtOAc, 90:10) and the desired product was obtained as an off white solid (56 mg, 79%); **Rf**: 0.56 (hexane/EtOAc, 90:10);

**$^1\text{H}$  NMR (400 MHz,  $\text{CDCl}_3$ )**  $\delta$ = 8.19 (dd,  $J$  = 9.1, 5.5 Hz, 1H), 7.67 (bs, 1H), 7.49 (dd,  $J$  = 7.7, 2.8 Hz, 1H), 7.08 (ddd,  $J$  = 9.1, 7.8, 2.9 Hz, 1H), 1.36 (s, 9H);  **$^{13}\text{C}\{^1\text{H}\}$  NMR (101 MHz,  $\text{CDCl}_3$ )**  $\delta$ = 176.9, 156.6 (d,  $J$  = 248.6 Hz), 134.9 (d,  $J$  = 3.1 Hz), 125.3 (d,  $J$  = 24.8 Hz), 122.8 (d,  $J$  = 7.7 Hz), 116.1 (d,  $J$  = 21.5 Hz), 89.7 (d,  $J$  = 8.3 Hz), 40.2, 27.8;  **$^{19}\text{F}$  NMR (470 MHz,  $\text{CDCl}_3$ )**  $\delta$ = -116.61.

#### ***N*-(4-chloro-2-iodophenyl)pivalamide (3f):**

Following the general procedure D using *N*-(4-chlorophenyl)pivalamide (47 mg, 0.22 mmol, 1 equiv.),  $\text{BBr}_3$  (0.26 mmol, 1.2 equiv., 1M in  $\text{CH}_2\text{Cl}_2$ ), at 22 °C for 2 h and Selectfluor (0.44 mmol, 2 equiv.), KI

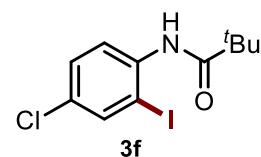

(0.48 mmol, 2.2 equiv.) at 60 °C for 5 h. The crude product was purified by automated column chromatography (pentane/EtOAc, 90:10) and the desired product was obtained as an off white solid (61 mg, 82%); **Rf**: 0.70 (hexane/EtOAc, 90:10); **Mp**: 73-75 °C;  **$^1\text{H}$  NMR (400 MHz,  $\text{CDCl}_3$ )**  $\delta$ = 8.25 (d,  $J$  = 8.9 Hz, 1H),

7.77 (bs, 1H), 7.75 (d,  $J$  = 2.4 Hz, 1H), 7.32 (dd,  $J$  = 8.8, 2.4 Hz, 1H), 1.36 (s, 9H);  **$^{13}\text{C}\{^1\text{H}\}$  NMR (101**



**MHz, CDCl<sub>3</sub>**)  $\delta$ = 176.9, 137.8, 137.3, 129.6, 129.4, 122.1, 89.8, 40.3, 27.8; **IR (neat, cm<sup>-1</sup>)** = 3400 (br), 3327 (w), 2961 (w), 1687 (s), 1571 (m), 1501 (s), 1375 (m), 1292 (m), 1156 (w), 1031 (w), 865 (w), 821 (w), 710 (w), 540 (w); **HRMS (ESI) (m/z)**: calculated for [M+H]<sup>+</sup> C<sub>11</sub>H<sub>14</sub>ClINO<sup>+</sup> 337.9809; found 337.9809.

#### ***N*-(4-bromo-2-iodophenyl)pivalamide (3g):**

Following the general procedure D using *N*-(4-bromophenyl)pivalamide (56 mg, 0.22 mmol, 1 equiv.), BBr<sub>3</sub> (0.26 mmol, 1.2 equiv., 1M in CH<sub>2</sub>Cl<sub>2</sub>), at 22 °C for 2 h and Selectfluor (0.44 mmol, 2 equiv.), KI

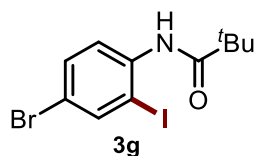

(0.48 mmol, 2.2 equiv.) at 60 °C for 5 h. The crude product was purified by automated column chromatography (pentane/EtOAc, 90:10) and the desired product was obtained as an off white solid (69 mg, 82%); **Rf**: 0.70 (hexane/EtOAc, 90:10); **Mp**: 72-74 °C; **<sup>1</sup>H NMR (400 MHz, CDCl<sub>3</sub>)**  $\delta$ = 8.21 (d, *J* = 8.8 Hz, 1H), 7.89 (d, *J* = 2.2 Hz, 1H), 7.77 (bs, 1H), 7.45 (dd, *J* = 8.9, 2.2 Hz, 1H), 1.36 (s, 9H); **<sup>13</sup>C{<sup>1</sup>H} NMR (101 MHz, CDCl<sub>3</sub>)**  $\delta$ = 176.9, 140.5, 137.7, 132.3, 122.5, 117.0, 90.2, 40.4, 27.8; **IR (neat, cm<sup>-1</sup>)** = 3399 (br), 2961 (w), 2928 (w), 1690 (m), 1589 (m), 1503 (s), 1370 (m), 1291 (m), 1156 (m), 819 (w), 672 (w), 535 (w); **HRMS (ESI) (m/z)**: calculated for [M+H]<sup>+</sup> C<sub>11</sub>H<sub>14</sub>BrINO<sup>+</sup> 381.9303; found 381.9305.

#### ***N*-(2-iodo-4-nitrophenyl)pivalamide (3h):** <sup>(8)</sup>

Following the general procedure D using *N*-(4-nitrophenyl)pivalamide (49 mg, 0.22 mmol, 1 equiv.), BBr<sub>3</sub> (2.64 mmol, 12 equiv., 1M in CH<sub>2</sub>Cl<sub>2</sub>), at 22 °C for 2 h and Selectfluor (0.44 mmol, 2 equiv.), KI

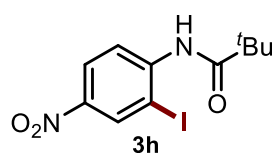

(0.48 mmol, 2.2 equiv.) at 60 °C for 5 h. The crude product was purified by automated column chromatography (pentane/EtOAc, 90:10) and the desired product was obtained as a yellow solid (32 mg, 42%); **Rf**: 0.43 (hexane/EtOAc, 90:10); **<sup>1</sup>H NMR (400 MHz, CDCl<sub>3</sub>)**  $\delta$ = 8.66 (d, *J* = 2.6 Hz, 1H), 8.60 (d, *J* = 9.2 Hz, 1H), 8.23 (dd, *J* = 9.2, 2.6 Hz, 1H), 8.14 (bs, 1H), 1.39 (s, 9H); **<sup>13</sup>C{<sup>1</sup>H} NMR (101 MHz, CDCl<sub>3</sub>)**  $\delta$ = 177.3, 144.1, 143.4, 134.2, 125.1, 119.6, 87.8, 40.8, 27.7.

#### ***N*-(2-iodo-5-methylphenyl)pivalamide (3i):**

Following the general procedure D using *N*-(*m*-tolyl)pivalamide (43 mg, 0.22 mmol, 1 equiv.), BBr<sub>3</sub> (0.26 mmol, 1.2 equiv., 1M in CH<sub>2</sub>Cl<sub>2</sub>), at 22 °C for 2 h and Selectfluor (0.44 mmol, 2 equiv.), KI (0.48 mmol, 2.2 equiv.) at 60 °C for 5 h. The crude product was purified by automated column

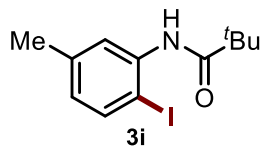

chromatography (pentane/EtOAc, 90:10) and the desired product was obtained as an off white solid (65 mg, 93%); **Rf**: 0.66 (hexane/EtOAc, 90:10); **Mp**: 76-78 °C; **<sup>1</sup>H NMR (400 MHz, CDCl<sub>3</sub>)**  $\delta$ = 8.16 (d, *J* = 2.1 Hz, 1H), 7.76 (bs, 1H), 7.62 (d, *J* = 8.1 Hz, 1H), 6.67 (dd, *J* = 8.2, 2.2 Hz, 1H), 2.32 (s, 3H), 1.36 (s, 9H); **<sup>13</sup>C{<sup>1</sup>H} NMR (101 MHz, CDCl<sub>3</sub>)**  $\delta$ = 177.0, 139.8, 138.3, 138.1, 126.9, 122.5, 86.1, 40.3, 27.8, 21.4; **IR (neat, cm<sup>-1</sup>)** = 3301 (br), 2957 (m), 2924 (m), 2866 (m), 1691 (s), 1574 (m), 1520 (s), 1407 (s), 1289 (m), 1184 (m), 1151 (w),

1102 (w), 801 (w), 668 (w), 577 (w); **HRMS (ESI) (m/z)**: calculated for  $[M+H]^+$   $C_{12}H_{17}INO^+$  318.0355; found 318.037.

#### ***N*-(2-iodo-5-methoxyphenyl)pivalamide (3j):**

Following the general procedure D using *N*-(3-methoxyphenyl)pivalamide (46 mg, 0.22 mmol, 1 equiv.),  $BBr_3$  (0.53 mmol, 2.4 equiv., 1M in  $CH_2Cl_2$ ), at 22 °C for 2 h and Selectfluor (0.44 mmol, 2 equiv.), KI

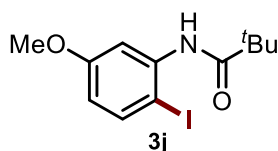

(0.48 mmol, 2.2 equiv.) at 60 °C for 5 h. The crude product was purified by

automated column chromatography (pentane/EtOAc, 90:10) and the desired product was obtained as a colorless gummy liquid (52 mg, 71%); **Rf**: 0.43

(hexane/EtOAc, 90:10);  **$^1H$  NMR (400 MHz,  $CDCl_3$ )**  $\delta$ = 8.10 (d,  $J$  = 3.0 Hz, 1H),

7.84 (bs, 1H), 7.59 (d,  $J$  = 8.8 Hz, 1H), 6.47 (dd,  $J$  = 8.8, 3.0 Hz, 1H), 3.81 (s, 3H), 1.37 (s, 9H);  **$^{13}C\{^1H\}$  NMR (101 MHz,  $CDCl_3$ )**  $\delta$ = 177.2, 160.8, 139.2, 138.6, 113.2, 106.4, 77.9, 55.6, 40.5, 27.8; **IR (neat,  $cm^{-1}$ )** = 3398 (br), 2960 (w), 1690 (s), 1580 (s), 1519 (s), 1452 (m), 1414 (m), 1301 (m), 1206 (s), 1175

(m), 1050 (w), 1008 (w), 859 (w), 590 (w); **HRMS (ESI) (m/z)**: calculated for  $[M+H]^+$   $C_{12}H_{17}INO_2^+$

334.0304; found 334.0317.

#### ***N*-(5-fluoro-2-iodophenyl)pivalamide (3k):**

Following the general procedure D using *N*-(3-fluorophenyl)pivalamide (43 mg, 0.22 mmol, 1 equiv.),  $BBr_3$  (0.26 mmol, 1.2 equiv., 1M in  $CH_2Cl_2$ ), at 22 °C for 2 h and Selectfluor (0.44 mmol, 2 equiv.), KI

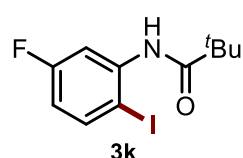

(0.48 mmol, 2.2 equiv.) at 60 °C for 5 h. The crude product was purified by automated

column chromatography (pentane/EtOAc, 90:10) and the desired product was obtained as a off white solid (65 mg, 92%); **Rf**: 0.73 (hexane/EtOAc, 90:10); **Mp**:

47-49 °C;  **$^1H$  NMR (400 MHz,  $CDCl_3$ )**  $\delta$ = 8.23 (dd,  $J$  = 11.2, 3.0 Hz, 1H), 7.87 (bs,

1H), 7.69 (ddd,  $J$  = 8.8, 6.0, 1.1 Hz, 1H), 6.62 (tdd,  $J$  = 8.7, 3.0, 1.1 Hz, 1H), 1.36 (s, 9H);  **$^{13}C\{^1H\}$  NMR (101 MHz,  $CDCl_3$ )**  $\delta$ = 177.1, 163.4 (d,  $J$  = 246.3 Hz), 139.7 (d,  $J$  = 11.9 Hz), 139.1 (d,  $J$  = 9.0 Hz), 112.8

(d,  $J$  = 22.6 Hz), 109.1 (d,  $J$  = 28.9 Hz), 82.21, 40.4, 27.8;  **$^{19}F$  NMR (470 MHz,  $CDCl_3$ )**  $\delta$ = -110.59; **IR (neat,  $cm^{-1}$ )** = 3398 (br), 2959 (w), 2928 (w), 1688 (m), 1596 (m), 1561 (s), 1491 (s), 1379 (m), 1294 (s),

1157 (s), 833 (w), 761 (s), 696 (m), 665 (w), 571 (w); **HRMS (ESI) (m/z)**: calculated for  $[M+H]^+$

$C_{11}H_{14}FINO^+$  322.0104; found 322.0119.

#### ***N*-(5-bromo-2-iodophenyl)pivalamide (3l):**

Following the general procedure D using *N*-(3-bromophenyl)pivalamide (56 mg, 0.22 mmol, 1 equiv.),  $BBr_3$  (0.26 mmol, 1.2 equiv., 1M in  $CH_2Cl_2$ ), at 22 °C for 2 h and Selectfluor (0.44 mmol, 2 equiv.), KI

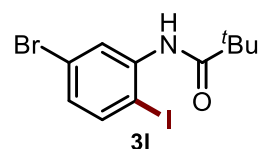

(0.48 mmol, 2.2 equiv.) at 60 °C for 5 h. The crude product was purified by

automated column chromatography (pentane/EtOAc, 90:10) and the desired product was obtained as an off white solid (81 mg, 96%); **Rf**: 0.73 (hexane/EtOAc, 90:10); **Mp**: 91-93 °C;  **$^1H$  NMR (400 MHz,  $CDCl_3$ )**  $\delta$ = 8.57 (d,  $J$  = 2.3 Hz, 1H),

7.80 (bs, 1H), 7.60 (d,  $J = 8.4$  Hz, 1H), 6.97 (dd,  $J = 8.4, 2.3$  Hz, 1H), 1.36 (s, 9H);  $^{13}\text{C}\{^1\text{H}\}$  NMR (101 MHz,  $\text{CDCl}_3$ )  $\delta = 177.0, 139.5, 128.7, 124.4, 123.5, 87.6, 40.4, 27.8$ .

#### *N*-(2-iodo-5-(trifluoromethyl)phenyl)pivalamide (3m):

Following the general procedure D using *N*-(3-(trifluoromethyl)phenyl)pivalamide (54 mg, 0.22 mmol, 1 equiv.),  $\text{BBr}_3$  (2.2 mmol, 10 equiv., 1M in  $\text{CH}_2\text{Cl}_2$ ), at 22 °C for 2 h and Selectfluor (0.44 mmol, 2 equiv.),

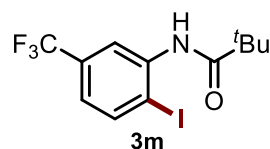

KI (0.48 mmol, 2.2 equiv.) at 60 °C for 5 h. The crude product was purified by automated column chromatography (pentane/EtOAc, 90:10) and the desired product was obtained as an off white solid (47 mg, 57%); **Rf**: 0.43 (hexane/EtOAc, 90:10); **Mp**: 70-72 °C;  $^1\text{H}$  NMR (400 MHz,  $\text{CDCl}_3$ )  $\delta = 8.67$  (d,  $J = 2.2$  Hz, 1H),

7.93 (s, 1H), 7.89 (d,  $J = 8.2$  Hz, 1H), 7.08 (dd,  $J = 8.3, 1.5$  Hz, 1H), 1.38 (s, 9H);  $^{13}\text{C}\{^1\text{H}\}$  NMR (101 MHz,  $\text{CDCl}_3$ )  $\delta = 177.2, 139.3, 139.1, 132.0$  (q,  $J = 32.9$  Hz), 123.7 (q,  $J = 272.7$  Hz), 121.9 (q,  $J = 3.8$  Hz), 118.1 (q,  $J = 4.1$  Hz), 93.6, 40.4, 27.7;  $^{19}\text{F}$  NMR (470 MHz,  $\text{CDCl}_3$ )  $\delta = -63.03$ ; **IR** (neat,  $\text{cm}^{-1}$ ) = 3398 (br), 2960 (w), 2925 (w), 1692 (m), 1578 (w), 1520 (s), 1417 (s), 1328 (s), 1260 (m), 1126 (s), 1079 (s), 1015 (s), 817 (m), 752 (w), 568 (w); **HRMS** (ESI) ( $m/z$ ): calculated for  $[\text{M}+\text{H}]^+$   $\text{C}_{12}\text{H}_{14}\text{F}_3\text{INO}^+$  372.0072; found 372.0086.

#### *N*-(2-iodo-6-methylphenyl)pivalamide (3n):

Following the general procedure D using *N*-(*o*-tolyl)pivalamide (43 mg, 0.22 mmol, 1 equiv.),  $\text{BBr}_3$  (0.26 mmol, 1.2 equiv., 1M in  $\text{CH}_2\text{Cl}_2$ ), at 22 °C for 16 h and Selectfluor (0.44 mmol, 2 equiv.), KI (0.48 mmol,

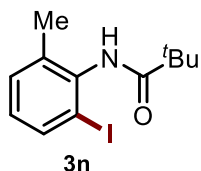

2.2 equiv.) at 60 °C for 5 h. The crude product was purified by automated column chromatography (pentane/EtOAc, 90:10) and the desired product was obtained as an off white solid (45 mg, 64%); **Rf**: 0.26 (hexane/EtOAc, 90:10); **Mp**: 189-191 °C;  $^1\text{H}$  NMR

(400 MHz,  $\text{CDCl}_3$ )  $\delta = 7.67$  (dd,  $J = 8.0, 0.8$  Hz, 1H), 7.20 (d,  $J = 7.6$  Hz, 1H), 7.10 (bs, 1H), 6.89 (t,  $J = 7.8$  Hz, 1H), 2.25 (s, 3H), 1.38 (s, 9H);  $^{13}\text{C}\{^1\text{H}\}$  NMR (101 MHz,  $\text{CDCl}_3$ )  $\delta = 176.2, 137.9, 137.1, 136.7, 131.1, 128.8, 99.32, 39.5, 27.9, 19.7$ ; **IR** (neat,  $\text{cm}^{-1}$ ) = 3267 (br), 2958 (m), 2924 (m), 1650 (s), 1504 (s), 1229 (w), 1177 (m), 936 (w), 762 (m), 709 (w), 642 (w); **HRMS** (ESI) ( $m/z$ ): calculated for  $[\text{M}+\text{H}]^+$   $\text{C}_{12}\text{H}_{17}\text{INO}^+$  318.0355; found 318.0369.

#### *N*-(2-fluoro-6-iodophenyl)pivalamide (3o):

Following the general procedure D using *N*-(2-fluorophenyl)pivalamide (43 mg, 0.22 mmol, 1 equiv.),  $\text{BBr}_3$  (0.26 mmol, 1.2 equiv., 1M in  $\text{CH}_2\text{Cl}_2$ ), at 40 °C for 16 h and Selectfluor (0.44 mmol, 2 equiv.), KI

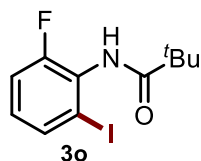

(0.48 mmol, 2.2 equiv.) at 60 °C for 5 h. The crude product was purified by automated column chromatography (pentane/EtOAc, 90:10) and the desired product was obtained as an off white solid (34 mg, 48%); **Rf**: 0.20 (hexane/EtOAc, 90:10); **Mp**: 159-161 °C;

$^1\text{H}$  NMR (400 MHz,  $\text{CDCl}_3$ )  $\delta = 7.61$  (dt,  $J = 8.0, 1.1$  Hz, 1H), 7.12 (tt,  $J = 8.3, 1.2$  Hz, 1H), 7.02 – 6.94 (m, 2H), 1.37 (s, 9H);  $^{13}\text{C}\{^1\text{H}\}$  NMR (101 MHz,  $\text{CDCl}_3$ )  $\delta = 176.5, 157.4$  (d,  $J = 254.8$

Hz), 134.3 (d,  $J = 3.7$  Hz), 127.6, 129.6 (d,  $J = 8.4$  Hz), 116.74 (d,  $J = 21.2$  Hz), 98.7, 39.5, 27.7;  $^{19}\text{F}$  NMR (470 MHz,  $\text{CDCl}_3$ )  $\delta = -112.48$ ; IR (neat,  $\text{cm}^{-1}$ ) = 3271 (br), 2973 (w), 2927 (w), 1659 (s), 1506 (s), 1472 (m), 1265(m), 1239 (w), 872 (w), 842 (w), 779 (m), 707 (w), 668 (w); HRMS (ESI) (m/z): calculated for  $[\text{M}+\text{H}]^+$   $\text{C}_{11}\text{H}_{14}\text{FINO}^+$  322.0104; found 322.0111.

#### *N*-(2-iodo-3,5-dimethylphenyl)pivalamide (3p):

Following the general procedure D using *N*-(3,5-dimethylphenyl)pivalamide (45 mg, 0.22 mmol, 1 equiv.),  $\text{BBr}_3$  (0.26 mmol, 1.2 equiv., 1M in  $\text{CH}_2\text{Cl}_2$ ), at 22 °C for 2 h and Selectfluor (0.44 mmol, 2

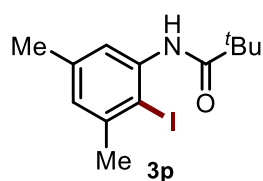

equiv.), KI (0.48 mmol, 2.2 equiv.) at 60 °C for 5 h. The crude product was purified by automated column chromatography (pentane/EtOAc, 90:10) and the desired product was obtained as an off white solid (67 mg, 92%); Rf: 0.66 (hexane/EtOAc, 90:10); Mp: 49-51 °C;  $^1\text{H}$  NMR (400 MHz,  $\text{CDCl}_3$ )  $\delta = 7.95$  (d,  $J = 2.1$  Hz, 1H),

7.93 (bs, 1H), 6.85 (d,  $J = 2.2$  Hz, 1H), 2.43 (s, 3H), 2.29 (s, 3H), 1.37 (s, 9H);  $^{13}\text{C}\{^1\text{H}\}$  NMR (101 MHz,  $\text{CDCl}_3$ )  $\delta = 177.0$ , 141.8, 138.9, 138.2, 126.7, 119.9, 93.8, 40.4, 29.5, 27.9, 21.2; IR (neat,  $\text{cm}^{-1}$ ) = 3397 (br), 2959 (w), 1692 (s), 1521 (w), 1456 (s), 1417 (w), 1182 (w), 668 (s), 582 (w); HRMS (ESI) (m/z): calculated for  $[\text{M}+\text{H}]^+$   $\text{C}_{13}\text{H}_{19}\text{INO}^+$  332.0511; found 332.0527.

#### *N*-(6-fluoro-2-iodo-3-methylphenyl)pivalamide (3q):

Following the general procedure D using *N*-(2-fluoro-5-methylphenyl)pivalamide (46 mg, 0.22 mmol, 1 equiv.),  $\text{BBr}_3$  (0.26 mmol, 1.2 equiv., 1M in  $\text{CH}_2\text{Cl}_2$ ), at 40 °C for 16 h and Selectfluor (0.44 mmol, 2

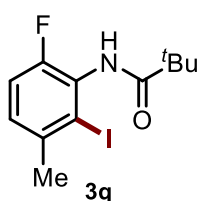

equiv.), KI (0.48 mmol, 2.2 equiv.) at 60 °C for 5 h. The crude product was purified by automated column chromatography (pentane/EtOAc, 90:10) and the desired product was obtained as an off white solid (47 mg, 64%); Rf: 0.23 (hexane/EtOAc, 90:10); Mp: 189-191 °C;  $^1\text{H}$  NMR (400 MHz,  $\text{CDCl}_3$ )  $\delta = 7.14$  (dd,  $J = 8.5, 5.4$  Hz, 1H), 7.04 (d,  $J = 8.8$  Hz, 1H), 7.01 (bs, 1H), 2.45 (s, 3H), 1.38 (s, 9H);  $^{13}\text{C}\{^1\text{H}\}$  NMR (101 MHz,  $\text{CDCl}_3$ )

$\delta = 176.5$ , 155.3 (d,  $J = 252.1$  Hz), 138.2 (d,  $J = 3.6$  Hz), 128.5 (d,  $J = 7.8$  Hz), 127.12 (d,  $J = 14.5$  Hz), 115.7 (d,  $J = 20.7$  Hz), 105.5, 39.5, 28.6, 27.8;  $^{19}\text{F}$  NMR (470 MHz,  $\text{CDCl}_3$ )  $\delta = -116.59$ ; IR (neat,  $\text{cm}^{-1}$ ) = 3317 (br), 2980 (w), 2956 (w), 2920 (w), 1654 (s), 1500 (s), 1478 (s), 1285 (w), 1185 (w), 1157 (m), 838 (w), 816 (m), 573 (w); HRMS (ESI) (m/z): calculated for  $[\text{M}+\text{H}]^+$   $\text{C}_{12}\text{H}_{16}\text{FINO}^+$  336.0261; found 336.0271.

#### *N*-(3,5-dichloro-2-iodophenyl)pivalamide (3r):

Following the general procedure D using *N*-(3,5-dichlorophenyl)pivalamide (54 mg, 0.22 mmol, 1 equiv.),  $\text{BBr}_3$  (0.26 mmol, 1.2 equiv., 1M in  $\text{CH}_2\text{Cl}_2$ ), at 40 °C for 16 h and Selectfluor (0.44 mmol, 2 equiv.), KI

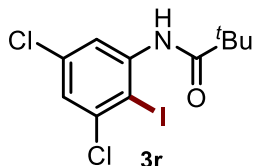

(0.48 mmol, 2.2 equiv.) at 60 °C for 5 h. The crude product was purified by automated column chromatography (pentane/EtOAc, 90:10) and the desired product was obtained as an off white solid (47 mg, 57%); Rf: 0.53 (hexane/EtOAc, 90:10);

**Mp:** 99-101 °C;  $^1\text{H NMR}$  (400 MHz,  $\text{CDCl}_3$ )  $\delta$ = 8.36 (d,  $J$  = 2.3 Hz, 1H), 8.04 (bs, 1H), 7.24 (d,  $J$  = 2.3 Hz, 1H), 1.36 (s, 9H);  $^{13}\text{C}\{^1\text{H}\}$  NMR (101 MHz,  $\text{CDCl}_3$ )  $\delta$ = 177.2, 141.1, 139.2, 135.9, 124.3, 119.1, 92.3, 40.5, 27.7; **IR** (neat,  $\text{cm}^{-1}$ ) = 3385 (br), 2952 (w), 1698 (s), 1560 (s), 1500 (s), 1399 (s), 1370 (s), 1141 (s), 1012 (m), 919 (m), 804 (m), 577 (m); **HRMS (ESI) (m/z):** calculated for  $[\text{M}+\text{H}]^+$   $\text{C}_{11}\text{H}_{13}\text{Cl}_2\text{INO}^+$  371.9419; found 371.9414.

#### ***N*-(4-iodo-[1,1'-biphenyl]-3-yl)pivalamide (3s):**

Following the general procedure D using *N*-([1,1'-biphenyl]-3-yl)pivalamide (56 mg, 0.22 mmol, 1 equiv.),  $\text{BBr}_3$  (0.26 mmol, 1.2 equiv., 1M in  $\text{CH}_2\text{Cl}_2$ ), at 22 °C for 2 h and Selectfluor (0.44 mmol, 2

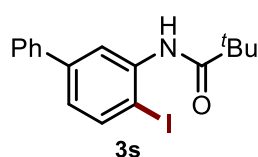

equiv.), KI (0.48 mmol, 2.2 equiv.) at 60 °C for 5 h. The crude product was purified by automated column chromatography (pentane/EtOAc, 90:10) and the desired product was obtained as an off white solid (81 mg, 97%); **Rf:** 0.70 (hexane/EtOAc, 90:10); **Mp:** 113-115 °C;  $^1\text{H NMR}$  (400 MHz,  $\text{CDCl}_3$ )  $\delta$ = 8.63 (d,  $J$  = 2.2 Hz, 1H),

7.87 (bs, 1H), 7.82 (d,  $J$  = 8.2 Hz, 1H), 7.65 – 7.59 (m, 2H), 7.42 (dd,  $J$  = 8.3, 6.6 Hz, 2H), 7.38 – 7.31 (m, 1H), 7.09 (dd,  $J$  = 8.2, 2.2 Hz, 1H), 1.40 (s, 9H);  $^{13}\text{C}\{^1\text{H}\}$  NMR (101 MHz,  $\text{CDCl}_3$ )  $\delta$ = 177.1, 142.7, 139.9, 138.9, 138.7, 128.9, 127.9, 127.2, 124.4, 120.4, 88.6, 40.4, 27.8; **IR** (neat,  $\text{cm}^{-1}$ ) = 3399 (br), 2960 (w), 2928 (w), 1688 (s), 1560 (s), 1521 (s), 1491 (s), 1400 (s), 1157 (m), 759 (s), 697 (m), 571 (w); **HRMS (ESI) (m/z):** calculated for  $[\text{M}+\text{H}]^+$   $\text{C}_{17}\text{H}_{19}\text{INO}^+$  380.0511; found 380.0518.

#### ***N*-(3-iodo-[1,1'-biphenyl]-4-yl)pivalamide (3t):**

Following the general procedure D using *N*-([1,1'-biphenyl]-4-yl)pivalamide (56 mg, 0.22 mmol, 1 equiv.),  $\text{BBr}_3$  (0.26 mmol, 1.2 equiv., 1M in  $\text{CH}_2\text{Cl}_2$ ), at 22 °C for 2 h and Selectfluor (0.44 mmol, 2

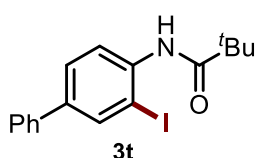

equiv.), KI (0.48 mmol, 2.2 equiv.) at 60 °C for 5 h. The crude product was purified by automated column chromatography (pentane/EtOAc, 90:10) and the desired product was obtained as an off white solid (56 mg, 67%); **Rf:** 0.60 (hexane/EtOAc, 90:10); **Mp:** 106-108 °C;  $^1\text{H NMR}$  (400 MHz,  $\text{CDCl}_3$ )  $\delta$ = 8.36 (d,  $J$  = 8.5 Hz, 1H),

8.01 (d,  $J$  = 2.1 Hz, 1H), 7.86 (bs, 1H), 7.58 (dd,  $J$  = 8.6, 2.1 Hz, 1H), 7.56 – 7.52 (m, 2H), 7.43 (td,  $J$  = 7.2, 1.2 Hz, 2H), 7.37 – 7.31 (m, 1H), 1.39 (s, 9H);  $^{13}\text{C}\{^1\text{H}\}$  NMR (101 MHz,  $\text{CDCl}_3$ )  $\delta$ = 176.9, 139.2, 138.8, 137.6, 137.1, 129.0, 128.0, 127.7, 127.0, 121.7, 90.6, 40.3, 27.9; **IR** (neat,  $\text{cm}^{-1}$ ) = 3398 (br), 2959 (w), 2928 (w), 1688 (m), 1596 (m), 1561 (s), 1491 (s), 1379 (m), 1294 (s), 1157 (s), 833 (w), 761 (s), 696 (m), 665 (w), 571 (w); **HRMS (ESI) (m/z):** calculated for  $[\text{M}+\text{H}]^+$   $\text{C}_{17}\text{H}_{19}\text{INO}^+$  380.0511; found 380.0523.

### *N*-(3-iodoanthracen-2-yl)pivalamide (**3u**):

Following the general procedure D using *N*-(anthracen-2-yl)pivalamide (61 mg, 0.22 mmol, 1 equiv.), BBr<sub>3</sub> (0.26 mmol, 1.2 equiv., 1M in CH<sub>2</sub>Cl<sub>2</sub>), at 22 °C for 2 h and Selectfluor (0.44 mmol, 2 equiv.), KI

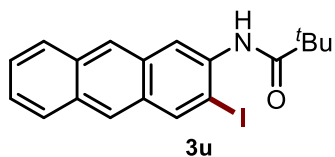

(0.48 mmol, 2.2 equiv.) at 60 °C for 5 h. The crude product was purified by automated column chromatography (hexane/EtOAc, 90:10) and the desired product was obtained as a yellow solid (38 mg, 43%); **Rf**: 0.5 (pentane/EtOAc, 90:10); **Mp**: 163-165 °C; <sup>1</sup>H NMR (400 MHz, CDCl<sub>3</sub>) δ=

8.60 (d, *J* = 1.2 Hz, 1H), 8.36 – 8.31 (m, 2H), 8.18 (bs, 1H), 8.05 (dd, *J* = 8.6, 1.1 Hz, 1H), 8.00 (d, *J* = 8.1 Hz, 1H), 7.95 (d, *J* = 9.3 Hz, 1H), 7.54 – 7.45 (m, 2H), 1.45 (s, 9H); <sup>13</sup>C{<sup>1</sup>H} NMR (101 MHz, CDCl<sub>3</sub>) δ= 177.2, 138.0, 133.0, 132.4, 131.4, 130.6, 129.9, 129.8, 128.3, 127.9, 127.2, 126.4, 125.9, 121.4, 92.9, 40.4, 27.9; IR (neat, cm<sup>-1</sup>) = 3391 (br), 2958 (m), 2925 (m), 1683 (s), 1617 (m), 1533 (s), 1483 (s), 1419 (m), 1297 (s), 1153 (m), 872 (m), 739 (m), 669 (w), 577 (w); HRMS (ESI) (*m/z*): calculated for [M+H]<sup>+</sup> C<sub>19</sub>H<sub>19</sub>INO<sup>+</sup> 404.0511; found 404.0515.

### *N*-(4-iodo-[1,1':4',1''-terphenyl]-3-yl)pivalamide (**3v**):

Following the general procedure D using *N*-([1,1':4',1''-terphenyl]-3-yl)pivalamide (72.5 mg, 0.22 mmol, 1 equiv.), BBr<sub>3</sub> (0.26 mmol, 1.2 equiv., 1M in CH<sub>2</sub>Cl<sub>2</sub>), at 22 °C for 2 h and Selectfluor (0.44 mmol, 2

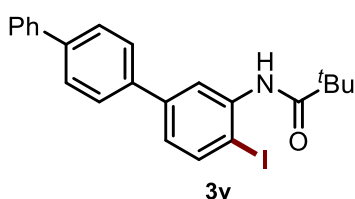

equiv.), KI (0.48 mmol, 2.2 equiv.) at 60 °C for 5 h. The crude product was purified by automated column chromatography (pentane/EtOAc, 90:10) and the desired product was obtained as an off white solid (88 mg, 88%); **Rf**: 0.43 (hexane/EtOAc, 90:10); **Mp**: 185-187 °C; <sup>1</sup>H NMR (400 MHz, CDCl<sub>3</sub>) δ= 8.68 (d, *J* = 2.2 Hz, 1H), 7.89 (bs, 1H), 7.84 (d, *J* = 8.2 Hz, 1H),

7.71 (d, *J* = 8.1 Hz, 2H), 7.68 – 7.61 (m, 4H), 7.46 (t, *J* = 7.5 Hz, 2H), 7.37 (t, *J* = 7.3 Hz, 1H), 7.14 (dd, *J* = 8.3, 2.3 Hz, 1H), 1.41 (s, 9H); <sup>13</sup>C{<sup>1</sup>H} NMR (101 MHz, CDCl<sub>3</sub>) δ= 177.1, 142.1, 140.8, 140.7, 139.0, 138.8, 138.8, 129.0, 127.6, 127.6, 127.6, 127.2, 124.2, 120.2, 88.6, 40.4, 27.9; IR (neat, cm<sup>-1</sup>) = 3260 (br), 2962 (m), 2927 (m), 1684 (s), 1558 (m), 1506 (s), 814 (w), 763 (s), 668 (m); HRMS (ESI) (*m/z*): calculated for [M+H]<sup>+</sup> C<sub>23</sub>H<sub>23</sub>INO<sup>+</sup> 456.0824; found 456.0828.

### *N*-(2-iodo-4-tritylphenyl)pivalamide (**3w**):

Following the general procedure D using *N*-(4-tritylphenyl)pivalamide (63 mg, 0.15 mmol, 1 equiv.), BBr<sub>3</sub> (0.18 mmol, 1.2 equiv., 1M in CH<sub>2</sub>Cl<sub>2</sub>), at 22 °C for 2 h and Selectfluor (0.30 mmol, 2 equiv.), KI

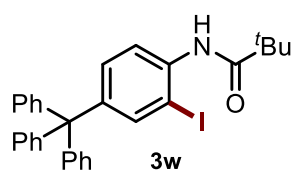

(0.33 mmol, 2.2 equiv.) at 60 °C for 5 h. The crude product was purified by automated column chromatography (pentane/EtOAc, 90:10) and the desired product was obtained as an off white solid (72 mg, 88%); **Rf**: 0.43 (hexane/EtOAc, 90:10); **Mp**: 221-223 °C; <sup>1</sup>H NMR (400 MHz, CDCl<sub>3</sub>) δ= 8.15

(d, *J* = 8.7 Hz, 1H), 7.78 (bs, 1H), 7.63 (d, *J* = 2.2 Hz, 1H), 7.26 – 7.22 (m, 6H), 7.21 – 7.16 (m, 10H),



1.34 (s, 9H);  $^{13}\text{C}\{^1\text{H}\}$  NMR (101 MHz,  $\text{CDCl}_3$ )  $\delta$ = 176.9, 146.4, 144.7, 140.6, 136.3, 132.7, 131.1, 127.8, 126.3, 120.4, 89.5, 64.4, 40.3, 27.8; IR (neat,  $\text{cm}^{-1}$ ) = 2958 (w), 2926 (w), 1697 (m), 1560 (m), 1505 (s), 1298 (m), 702 (m), 668 (m); HRMS (ESI) (m/z): calculated for  $[\text{M}+\text{H}]^+$   $\text{C}_{30}\text{H}_{29}\text{INO}^+$  546.1294; found 546.1292.

#### *N,N'*-(oxybis(2-iodo-4,1-phenylene))bis(2,2-dimethylpropanamide) (3x):

Following the general procedure D using *N,N'*-(oxybis(4,1-phenylene))bis(2,2-dimethylpropanamide) (81 mg, 0.22 mmol, 1 equiv.),  $\text{BBr}_3$  (0.48 mmol, 2.2 equiv., 1M in  $\text{CH}_2\text{Cl}_2$ ), at 22 °C for 2 h and Selectfluor (0.88 mmol, 4 equiv.), KI (0.92 mmol, 4.2 equiv.) at 60 °C for 5 h.

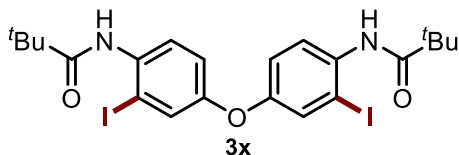

The reaction was performed in 10 mL R.B.F. The crude product was purified by automated column chromatography (pentane/EtOAc, 80:20) and the desired product was obtained as an off white solid

(85 mg, 62%); Rf: 0.16 (hexane/EtOAc, 90:10); Mp: 191-193 °C;  $^1\text{H}$  NMR (400 MHz,  $\text{CDCl}_3$ )  $\delta$ = 8.18 (d,  $J$  = 9.0 Hz, 2H), 7.70 (bs, 2H), 7.40 (d,  $J$  = 2.8 Hz, 2H), 7.00 (dd,  $J$  = 9.0, 2.7 Hz, 2H), 1.37 (s, 18H);  $^{13}\text{C}\{^1\text{H}\}$  NMR (101 MHz,  $\text{CDCl}_3$ )  $\delta$ = 176.9, 153.5, 134.5, 128.7, 122.8, 119.6, 90.5, 40.2, 27.8; IR (neat,  $\text{cm}^{-1}$ ) = 3336 (br), 3270 (br), 2960 (w), 2925 (w), 1655 (s), 1583 (w), 1507 (s), 1469 (s), 1395 (w), 1259 (m), 1204 (s), 1168 (s), 1028 (w), 915 (m), 809 (w), 606 (w); HRMS (ESI) (m/z): calculated for  $[\text{M}+\text{H}]^+$   $\text{C}_{22}\text{H}_{27}\text{I}_2\text{N}_2\text{O}_3^+$  621.0111; found 621,011.

#### *N*-(8-iodo-3,4-dihydro-2H-benzo[b][1,4]dioxepin-7-yl)pivalamide (3y):

Following the general procedure D using *N*-(3,4-dihydro-2H-benzo[b][1,4]dioxepin-7-yl)pivalamide (55 mg, 0.22 mmol, 1 equiv.),  $\text{BBr}_3$  (0.26 mmol, 1.2 equiv., 1M in  $\text{CH}_2\text{Cl}_2$ ), at 22 °C for 2 h and Selectfluor

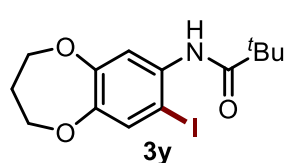

(0.44 mmol, 2 equiv.), KI (0.48 mmol, 2.2 equiv.) at 60 °C for 5 h. The crude product was purified by automated column chromatography (pentane/EtOAc, 90:10) and the desired product was obtained as an off white solid (51 mg, 62%);

Rf: 0.56 (hexane/EtOAc, 70:30); Mp: 127-129 °C;  $^1\text{H}$  NMR (400 MHz,  $\text{CDCl}_3$ )  $\delta$ = 7.93 (s, 1H), 7.60 (bs, 1H), 7.38 (s, 1H), 4.16 (dt,  $J$  = 13.3, 5.6 Hz, 4H), 2.16 (p,  $J$  = 5.6 Hz, 2H), 1.34 (s, 9H);  $^{13}\text{C}\{^1\text{H}\}$  NMR (101 MHz,  $\text{CDCl}_3$ )  $\delta$ = 176.6, 152.0, 148.5, 133.9, 130.5, 115.1, 81.1, 71.1, 70.7, 40.1, 31.9, 27.8; IR (neat,  $\text{cm}^{-1}$ ) = 3401 (br), 2960 (w), 1681 (m), 1572 (w), 1508 (s), 1401 (m), 1308 (s), 1197 (s), 979 (m), 923 (w), 836 (w), 653 (w); HRMS (ESI) (m/z): calculated for  $[\text{M}+\text{H}]^+$   $\text{C}_{14}\text{H}_{19}\text{INO}_3^+$  376.041; found 376.0406.

#### 2-(diethylamino)ethyl 3-iodo-4-pivalamidobenzoate (3z):

Following the general procedure D using 2-(diethylamino)ethyl 4-pivalamidobenzoate (48.9 mg, 0.15 mmol, 1 equiv.),  $\text{BBr}_3$  (0.18 mmol, 1.2 equiv., 1M in  $\text{CH}_2\text{Cl}_2$ ), at 40 °C for 16 h and Selectfluor (0.30 mmol, 2 equiv.), KI (0.33 mmol, 2.2 equiv.) at 60 °C for 5 h. The crude product was purified by automated

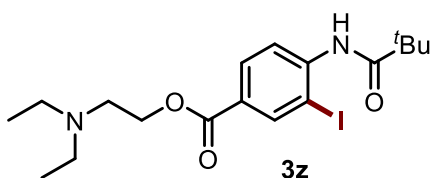

column chromatography (pentane/EtOAc, 90:10) and the desired product was obtained as an semi solid (17 mg, 25%); **Rf**: 0.15 (EtOAc, 100);  $^1\text{H NMR}$  (400 MHz,  $\text{CDCl}_3$ )  $\delta$ = 8.46 – 8.41 (m, 2H), 8.04 (bs, 1H), 7.98 (dd,  $J$  = 8.6, 2.0 Hz, 1H), 4.55 (t,  $J$  = 5.7 Hz, 2H), 3.23 (t,  $J$  = 5.7 Hz, 2H), 3.02 (q,  $J$  = 7.2 Hz, 4H), 1.37 (s, 9H), 1.25 (t,  $J$  = 7.2 Hz, 6H);  $^{13}\text{C}\{^1\text{H}\}$  NMR (101 MHz,  $\text{CDCl}_3$ )  $\delta$ = 176.6, 152.0, 148.5, 133.9, 130.5, 115.1, 81.1, 71.1, 70.7, 40.1, 31.9, 27.8; **IR** (neat,  $\text{cm}^{-1}$ ) = 3390 (br), 2963 (w), 2924 (w), 1719 (s), 1700 (s), 1592 (m), 1512 (s), 1385 (m), 1259 (s), 1228 (m), 1112 (s), 1067 (s), 1034 (s), 762 (m), 682 (w); **HRMS (ESI) (m/z)**: calculated for  $[\text{M}+\text{H}]^+$   $\text{C}_{18}\text{H}_{28}\text{IN}_2\text{O}_3^+$  447.1145; found 447.1147.

#### ***N*-(2-iodophenyl)benzamide (7a):**<sup>(11)</sup>

Following the general procedure E using *N*-phenylbenzamide (44 mg, 0.22 mmol, 1 equiv.),  $\text{BBr}_3$  (0.26 mmol, 1.2 equiv., 1M in  $\text{CH}_2\text{Cl}_2$ ), at 40 °C for 16 h and Selectfluor (0.44 mmol, 2 equiv.), KI (0.48 mmol,

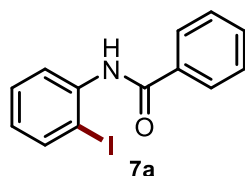

2.2 equiv.) at 60 °C for 5 h. The crude product was purified by automated column

chromatography (pentane/EtOAc, 90:10) and the desired product was obtained as

an off white solid (60 mg, 84%); **Rf**: 0.43 (hexane/EtOAc, 90:10);  $^1\text{H NMR}$  (400 MHz,  $\text{CDCl}_3$ )  $\delta$ = 8.47 (dd,  $J$  = 8.3, 1.6 Hz, 1H), 8.30 (bs, 1H), 7.98 (dt,  $J$  = 7.1, 1.5 Hz, 2H), 7.82 (dd,  $J$  = 8.0, 1.5 Hz, 1H), 7.63 – 7.57 (m, 1H), 7.56 – 7.49 (m, 2H),

7.45 – 7.37 (m, 1H), 6.89 (td,  $J$  = 7.6, 1.6 Hz, 1H);  $^{13}\text{C}\{^1\text{H}\}$  NMR (101 MHz,  $\text{CDCl}_3$ )  $\delta$ = 165.4, 138.9, 138.4, 134.7, 132.3, 129.6, 129.1, 127.3, 126.2, 121.9, 90.3.

#### ***N*-(2-iodophenyl)-4-methylbenzamide (7b):**<sup>(12)</sup>

Following the general procedure E using 4-methyl-*N*-phenylbenzamide (46 mg, 0.22 mmol, 1 equiv.),  $\text{BBr}_3$  (0.26 mmol, 1.2 equiv., 1M in  $\text{CH}_2\text{Cl}_2$ ), at 40 °C for 16 h and Selectfluor (0.44 mmol, 2 equiv.), KI

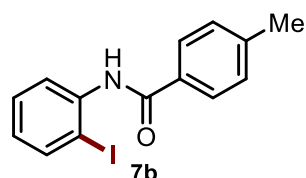

(0.48 mmol, 2.2 equiv.) at 60 °C for 5 h. The crude product was purified by

automated column chromatography (pentane/EtOAc, 90:10) and the desired

product was obtained as an off white solid (57 mg, 77%); **Rf**: 0.50 (hexane/EtOAc, 90:10);  $^1\text{H NMR}$  (400 MHz,  $\text{CDCl}_3$ )  $\delta$ = 8.47 (dd,  $J$  = 8.2, 1.6 Hz, 1H), 8.27 (bs, 1H), 7.87 (d,  $J$  = 7.9 Hz, 2H), 7.81 (dd,  $J$  = 8.0, 1.5 Hz, 1H),

7.44 – 7.37 (m, 1H), 7.33 (d,  $J$  = 7.9 Hz, 2H), 6.88 (td,  $J$  = 7.6, 1.6 Hz, 1H), 2.44 (s, 3H);  $^{13}\text{C}\{^1\text{H}\}$  NMR (101 MHz,  $\text{CDCl}_3$ )  $\delta$ = 165.4, 142.9, 138.9, 138.5, 131.8, 129.8, 129.5, 127.3, 126.0, 121.8, 90.3, 21.7.

#### ***N*-(2-iodophenyl)-3-methylbenzamide (7c):**<sup>(13)</sup>

Following the general procedure E using 3-methyl-*N*-phenylbenzamide (46 mg, 0.22 mmol, 1 equiv.),  $\text{BBr}_3$  (0.26 mmol, 1.2 equiv., 1M in  $\text{CH}_2\text{Cl}_2$ ), at 40 °C for 16 h and Selectfluor (0.44 mmol, 2 equiv.), KI

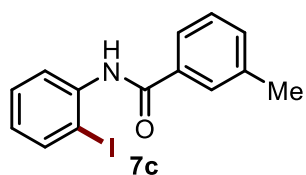

(0.48 mmol, 2.2 equiv.) at 60 °C for 5 h. The crude product was purified by

automated column chromatography (pentane/EtOAc, 90:10) and the desired

product was obtained as a off white solid (71 mg, 96%); **Rf**: 0.50 (hexane/EtOAc, 90:10);  $^1\text{H NMR}$  (400 MHz,  $\text{CDCl}_3$ )  $\delta$ = 8.46 (d,  $J$  = 8.3 Hz,



1H), 8.27 (bs, 1H), 7.82 (d,  $J = 7.9$  Hz, 1H), 7.79 (s, 1H), 7.75 (dt,  $J = 6.5, 2.2$  Hz, 1H), 7.41 (dq,  $J = 8.0, 4.3$  Hz, 3H), 6.88 (t,  $J = 7.6$  Hz, 1H), 2.46 (s, 3H);  $^{13}\text{C}\{^1\text{H}\}$  NMR (101 MHz,  $\text{CDCl}_3$ )  $\delta = 165.7, 139.0, 138.9, 138.5, 134.7, 133.1, 129.5, 128.9, 128.2, 126.1, 124.1, 121.9, 90.4, 21.6$ .

#### 4-fluoro-*N*-(2-iodophenyl)benzamide (7d):<sup>(11)</sup>

Following the general procedure E using 4-fluoro-*N*-phenylbenzamide (47 mg, 0.22 mmol, 1 equiv.),  $\text{BBr}_3$  (0.26 mmol, 1.2 equiv., 1M in  $\text{CH}_2\text{Cl}_2$ ), at 40 °C for 16 h and Selectfluor (0.44 mmol, 2 equiv.), KI (0.48 mmol, 2.2 equiv.) at 60 °C for 5 h. The crude product was purified by automated column chromatography (pentane/EtOAc, 90:10) and the desired product was obtained as an off white solid (56 mg, 75%); **Rf**: 0.56 (hexane/EtOAc, 80:20);  $^1\text{H}$  NMR (400 MHz,  $\text{CDCl}_3$ )  $\delta = 8.42$  (dd,  $J = 8.3, 1.6$  Hz, 1H), 8.22 (s, 1H), 8.02 – 7.96 (m, 2H), 7.82 (dd,  $J = 8.0, 1.5$  Hz, 1H), 7.40 (ddd,  $J = 8.6, 7.7, 1.5$  Hz, 1H), 7.24 – 7.18 (m, 2H), 6.89 (ddd,  $J = 8.0, 7.3, 1.6$  Hz, 1H);  $^{13}\text{C}\{^1\text{H}\}$  NMR (101 MHz,  $\text{CDCl}_3$ )  $\delta = 165.3$  (d,  $J = 249.6$  Hz), 164.4, 139.0, 138.2, 130.8 (d,  $J = 3.3$  Hz), 129.8, 129.6 (d,  $J = 7.7$  Hz), 126.3, 121.9, 116.2 (d,  $J = 22.0$  Hz), 90.5;  $^{19}\text{F}$  NMR (470 MHz,  $\text{CDCl}_3$ )  $\delta = -106.82$ .

#### 4-iodo-*N*-(2-iodophenyl)benzamide (7e):<sup>(14)</sup>

Following the general procedure E using 4-iodo-*N*-phenylbenzamide (71 mg, 0.22 mmol, 1 equiv.),  $\text{BBr}_3$  (0.26 mmol, 1.2 equiv., 1M in  $\text{CH}_2\text{Cl}_2$ ), at 40 °C for 16 h and Selectfluor (0.44 mmol, 2 equiv.), KI (0.48 mmol, 2.2 equiv.) at 60 °C for 5 h. The crude product was purified by automated column chromatography (pentane/EtOAc, 90:10) and the desired product was obtained as an off white solid (64 mg, 65%); **Rf**: 0.46 (hexane/EtOAc, 90:10);  $^1\text{H}$  NMR (400 MHz,  $\text{CDCl}_3$ )  $\delta = 8.42$  (dd,  $J = 8.3, 1.6$  Hz, 1H), 8.23 (bs, 1H), 7.88 (d,  $J = 8.4$  Hz, 2H), 7.82 (dd,  $J = 7.9, 1.5$  Hz, 1H), 7.69 (d,  $J = 8.4$  Hz, 2H), 7.44 – 7.36 (m, 1H), 6.90 (td,  $J = 7.6, 1.6$  Hz, 1H);  $^{13}\text{C}\{^1\text{H}\}$  NMR (101 MHz,  $\text{CDCl}_3$ )  $\delta = 164.7, 139.0, 138.3, 138.1, 134.1, 129.6, 128.8, 126.4, 121.9, 99.5, 90.4$ .

#### 2-bromo-*N*-(2-iodophenyl)benzamide (7f):<sup>(15)</sup>

Following the general procedure E using 2-bromo-*N*-phenylbenzamide (61 mg, 0.22 mmol, 1 equiv.),  $\text{BBr}_3$  (0.26 mmol, 1.2 equiv., 1M in  $\text{CH}_2\text{Cl}_2$ ), at 40 °C for 16 h and Selectfluor (0.44 mmol, 2 equiv.), KI (0.48 mmol, 2.2 equiv.) at 60 °C for 5 h. The crude product was purified by automated column chromatography (pentane/EtOAc, 90:10) and the desired product was obtained as an off white solid (46 mg, 52%); **Rf**: 0.46 (hexane/EtOAc, 80:20);  $^1\text{H}$  NMR (400 MHz,  $\text{CDCl}_3$ )  $\delta = 8.42$  (d,  $J = 8.2$  Hz, 1H), 7.93 (s, 1H), 7.83 (dd,  $J = 7.9, 1.5$  Hz, 1H), 7.68 (d,  $J = 7.8$  Hz, 2H), 7.47 – 7.39 (m, 2H), 7.36 (td,  $J = 7.7, 1.8$  Hz, 1H), 6.91 (td,  $J = 7.6, 1.6$  Hz, 1H);  $^{13}\text{C}\{^1\text{H}\}$  NMR (101 MHz,  $\text{CDCl}_3$ )  $\delta = 165.8, 139.2, 138.2, 137.7, 133.9, 132.0, 129.6, 129.5, 127.9, 126.7, 122.4, 119.6, 90.3$ .

### 2-iodo-*N*-(2-iodophenyl)benzamide (7g):<sup>(14)</sup>

Following the general procedure E using 2-iodo-*N*-phenylbenzamide (61 mg, 0.22 mmol, 1 equiv.), BBr<sub>3</sub> (0.26 mmol, 1.2 equiv., 1M in CH<sub>2</sub>Cl<sub>2</sub>), at 40 °C for 16 h and Selectfluor (0.44 mmol, 2 equiv.), KI (0.48 mmol, 2.2 equiv.) at 60 °C for 5 h. The crude product was purified by automated

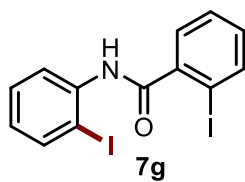

column chromatography (pentane/EtOAc, 90:10) and the desired product was obtained as an off white solid (46 mg, 52%); **Rf**: 0.46 (hexane/EtOAc, 80:20); <sup>1</sup>H

**NMR (400 MHz, CDCl<sub>3</sub>)** δ= 8.41 (d, *J* = 8.2 Hz, 1H), 7.96 (dd, *J* = 8.0, 1.1 Hz, 1H), 7.83 (dd, *J* = 8.0, 1.5 Hz, 1H), 7.75 (bs, 1H), 7.58 (d, *J* = 7.6 Hz, 1H), 7.47 (t, *J* = 7.5 Hz, 1H), 7.42 (t, *J* = 7.8 Hz, 1H), 7.19 (td, *J* = 7.7, 1.7 Hz, 1H), 6.92 (td, *J* = 7.7, 1.6 Hz, 1H); <sup>13</sup>C{<sup>1</sup>H} **NMR (101 MHz, CDCl<sub>3</sub>)** δ= 167.4, 141.8, 140.5, 139.1, 138.1, 131.9, 129.5, 128.6, 128.3, 126.7, 122.4, 92.7, 90.4.

### *N*-(2-iodophenyl)-4-(trifluoromethyl)benzamide (7h):<sup>(16)</sup>

Following the general procedure E using *N*-phenyl-4-(trifluoromethyl)benzamide (58 mg, 0.22 mmol, 1 equiv.), BBr<sub>3</sub> (0.26 mmol, 1.2 equiv., 1M in CH<sub>2</sub>Cl<sub>2</sub>), at 40 °C for 16 h and Selectfluor (0.44 mmol, 2 equiv.), KI (0.48 mmol, 2.2 equiv.) at 60 °C for 5 h. The crude product was

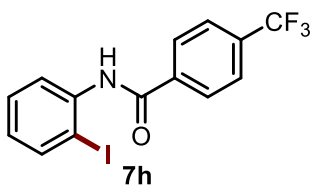

purified by automated column chromatography (pentane/EtOAc, 90:10) and the desired product was obtained as a off white solid (47 mg, 55%); **Rf**: 0.56 (hexane/EtOAc, 80:20); <sup>1</sup>H

**NMR (400 MHz, CDCl<sub>3</sub>)** δ= 8.42 (dd, *J* = 8.3, 1.6 Hz, 1H), 8.29 (bs, 1H), 8.08 (d, *J* = 8.2 Hz, 2H), 7.83 (dd, *J* = 7.9, 1.4 Hz, 1H), 7.80 (d, *J* = 8.3 Hz, 2H), 7.42 (td, *J* = 7.5, 1.5 Hz, 1H), 6.92 (td, *J* = 7.7, 1.6 Hz, 1H); <sup>13</sup>C{<sup>1</sup>H} **NMR (101 MHz, CDCl<sub>3</sub>)** δ= 164.1, 139.0, 137.9, 137.9 (q, *J* = 1.4 Hz), 134.0 (q, *J* = 32.8 Hz), 129.6, 127.8, 126.7, 126.2 (q, *J* = 3.8 Hz), 123.6 (d, *J* = 272.5 Hz), 122.1, 90.6; <sup>19</sup>F **NMR (470 MHz, CDCl<sub>3</sub>)** δ= -63.01.

### *N*-(2-iodophenyl)-3-nitrobenzamide (7i):

Following the general procedure E using 3-nitro-*N*-phenylbenzamide (53 mg, 0.22 mmol, 1 equiv.), BBr<sub>3</sub> (0.26 mmol, 1.2 equiv., 1M in CH<sub>2</sub>Cl<sub>2</sub>), at 40 °C for 16 h and Selectfluor (0.44 mmol, 2 equiv.), KI (0.48 mmol, 2.2 equiv.) at 60 °C for 5 h. The crude product was purified by

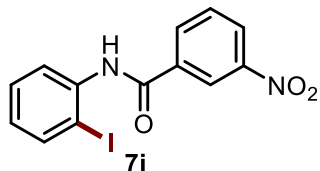

automated column chromatography (pentane/EtOAc, 90:10) and the desired product was obtained as a off white solid (60 mg, 74%); **Rf**: 0.30 (hexane/EtOAc, 80:20); <sup>1</sup>H

**NMR (400 MHz, CDCl<sub>3</sub>)** δ= 8.83 (t, *J* = 2.0 Hz, 1H), 8.44 (ddd, *J* = 8.2, 2.3, 1.1 Hz, 1H), 8.38 (dd, *J* = 8.2, 1.6 Hz, 1H), 8.31 (bs, 1H), 8.29 (t, *J* = 1.4 Hz, 1H), 7.84 (dd, *J* = 8.0, 1.5 Hz, 1H), 7.75 (t, *J* = 8.0 Hz, 1H), 7.43 (ddd, *J* = 8.5, 7.4, 1.5 Hz, 1H), 6.94 (td, *J* = 7.7, 1.6 Hz, 1H); <sup>13</sup>C{<sup>1</sup>H} **NMR (101 MHz, CDCl<sub>3</sub>)** δ= 163.0, 148.6, 139.1, 137.7, 136.3, 133.1, 130.4, 129.7, 126.9, 126.8, 122.5, 122.2, 90.9.

### *N*-(2-iodophenyl)furan-2-carboxamide (**7j**):<sup>(16)</sup>

Following the general procedure E using *N*-phenylfuran-2-carboxamide (41 mg, 0.22 mmol, 1 equiv.), BBr<sub>3</sub> (0.26 mmol, 1.2 equiv., 1M in CH<sub>2</sub>Cl<sub>2</sub>), at 40 °C for 16 h and Selectfluor (0.44 mmol, 2 equiv.), KI (0.48 mmol, 2.2 equiv.) at 60 °C for 5 h. The crude product was purified by automated

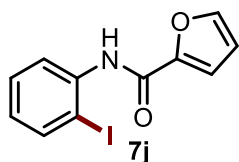

column chromatography (pentane/EtOAc, 90:10) and the desired product was obtained as an off white solid (56 mg, 86%); **Rf**: 0.50 (hexane/EtOAc, 80:20); <sup>1</sup>H NMR (400 MHz, CDCl<sub>3</sub>) δ= 8.54 (bs, 1H), 8.40 (dd, *J* = 8.2, 1.6 Hz, 1H), 7.81 (dd,

*J* = 8.0, 1.5 Hz, 1H), 7.58 (dd, *J* = 1.8, 0.8 Hz, 1H), 7.38 (td, *J* = 7.8, 1.5 Hz, 1H), 7.27 (dd, *J* = 3.5, 0.9 Hz, 1H), 6.87 (ddd, *J* = 7.9, 7.3, 1.6 Hz, 1H), 6.58 (dd, *J* = 3.5, 1.8 Hz, 1H); <sup>13</sup>C{<sup>1</sup>H} NMR (101 MHz, CDCl<sub>3</sub>) δ= 156.1, 147.8, 144.8, 139.1, 138.0, 129.5, 126.1, 121.7, 115.8, 112.8, 89.9.

### *N*-(2-iodophenyl)thiophene-2-carboxamide (**7k**):<sup>(16)</sup>

Following the general procedure E using *N*-phenylthiophene-2-carboxamide (45 mg, 0.22 mmol, 1 equiv.), BBr<sub>3</sub> (0.26 mmol, 1.2 equiv., 1M in CH<sub>2</sub>Cl<sub>2</sub>), at 40 °C for 16 h and Selectfluor (0.44 mmol, 2 equiv.), KI (0.48 mmol, 2.2 equiv.) at 60 °C for 5 h. The crude product was purified by automated

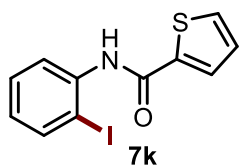

column chromatography (pentane/EtOAc, 90:10) and the desired product was obtained as an off white solid (62 mg, 86%); **Rf**: 0.50 (hexane/EtOAc, 80:20); <sup>1</sup>H NMR (400 MHz, CDCl<sub>3</sub>) δ= 8.39 (dd, *J* = 8.2, 1.6 Hz, 1H), 8.17 (bs, 1H), 7.81 (dd,

*J* = 7.9, 1.5 Hz, 1H), 7.72 (dd, *J* = 3.8, 1.2 Hz, 1H), 7.59 (dd, *J* = 5.0, 1.2 Hz, 1H), 7.39 (ddd, *J* = 8.5, 7.3, 1.5 Hz, 1H), 7.17 (dd, *J* = 5.0, 3.7 Hz, 1H), 6.88 (ddd, *J* = 8.0, 7.3, 1.6 Hz, 1H); <sup>13</sup>C{<sup>1</sup>H} NMR (101 MHz, CDCl<sub>3</sub>) δ= 159.8, 139.3, 138.9, 138.1, 131.5, 129.6, 128.8, 128.1, 126.2, 121.8, 90.1.

### *N*-(5-chloro-2-iodophenyl)-4-methylbenzamide (**7l**):

Following the general procedure E using *N*-(3-chlorophenyl)-4-methylbenzamide (54.08 mg, 0.22 mmol, 1 equiv.), BBr<sub>3</sub> (0.26 mmol, 1.2 equiv., 1M in CH<sub>2</sub>Cl<sub>2</sub>), at 40 °C for 16 h and Selectfluor (0.44 mmol, 2 equiv.), KI (0.48 mmol, 2.2 equiv.) at 60 °C for 5 h. The crude product was

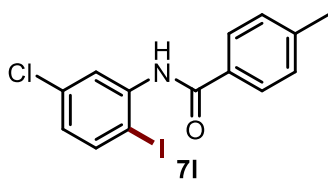

purified by automated column chromatography (pentane/EtOAc, 90:10) and the desired product was obtained as a off white solid (58 mg, 71%); **Rf**: 0.40 (hexane/EtOAc, 90:10); **Mp**: 133-135 °C; <sup>1</sup>H NMR (400 MHz, CDCl<sub>3</sub>) δ=

8.58 (d, *J* = 2.5 Hz, 1H), 8.27 (bs, 1H), 7.85 (d, *J* = 8.2 Hz, 2H), 7.70 (d, *J* = 8.5 Hz, 1H), 7.32 (d, *J* = 7.9 Hz, 2H), 6.87 (dd, *J* = 8.5, 2.5 Hz, 1H), 2.44 (s, 3H); <sup>13</sup>C{<sup>1</sup>H} NMR (101 MHz, CDCl<sub>3</sub>) δ= 165.3, 143.3, 139.4, 139.3, 135.6, 131.4, 129.8, 127.3, 125.9, 121.5, 86.9, 21.7; **HRMS (ESI) (m/z)**: calculated for [M+H]<sup>+</sup> C<sub>14</sub>H<sub>12</sub>ClINO<sup>+</sup> 371.9652; found 371.9658.

### (3*r*,5*r*,7*r*)-*N*-(2-iodophenyl)adamantane-1-carboxamide (**7m**):<sup>(17)</sup>

Following the general procedure E using (3*r*,5*r*,7*r*)-*N*-phenyladamantane-1-carboxamide (56 mg, 0.22 mmol, 1 equiv.), BBr<sub>3</sub> (0.26 mmol, 1.2 equiv., 1M in CH<sub>2</sub>Cl<sub>2</sub>), at 40 °C for 16 h and Selectfluor (0.44

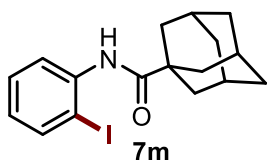

mmol, 2 equiv.), KI (0.48 mmol, 2.2 equiv.) at 60 °C for 5 h. The crude product was purified by automated column chromatography (pentane/EtOAc, 90:10) and the desired product was obtained as an off white solid (61 mg, 73%); **Rf**:

0.63 (hexane/EtOAc, 90:10); <sup>1</sup>H NMR (400 MHz, CDCl<sub>3</sub>) δ= 8.31 (dd, *J* = 8.3,

1.6 Hz, 1H), 7.76 (dd, *J* = 9.4, 2.3 Hz, 2H), 7.33 (ddd, *J* = 8.5, 7.3, 1.5 Hz, 1H), 6.82 (td, *J* = 7.6, 1.6 Hz, 1H), 2.12 (dd, *J* = 6.1, 3.1 Hz, 3H), 2.02 (d, *J* = 3.0 Hz, 6H), 1.81 – 1.74 (m, 6H); <sup>13</sup>C{<sup>1</sup>H} NMR (101 MHz, CDCl<sub>3</sub>) δ= 176.4, 138.8, 138.4, 129.4, 125.7, 121.9, 90.2, 42.2, 39.5, 36.6, 28.3.

#### ***N*-(2-iodophenyl)acetamide (7n):** <sup>(16)</sup>

Following the general procedure E using *N*-phenylacetamide (29.75 mg, 0.22 mmol, 1 equiv.), BBr<sub>3</sub> (0.66 mmol, 3 equiv., 1M in CH<sub>2</sub>Cl<sub>2</sub>), at 60 °C for 24 h and Selectfluor (0.44 mmol, 2 equiv.), KI (0.48 mmol,

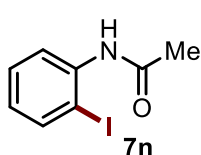

2.2 equiv.) at 60 °C for 5 h. The crude product was purified by automated column chromatography (pentane/EtOAc, 90:10) and the desired product was obtained as a off white solid (18 mg, 31%); <sup>1</sup>H NMR (400 MHz, CDCl<sub>3</sub>) δ= 8.19 (d, *J* = 8.2 Hz, 1H),

7.77 (dd, *J* = 8.0, 1.5 Hz, 1H), 7.43 (bs, 1H), 7.34 (td, *J* = 7.8, 1.5 Hz, 1H), 6.84 (t, *J* =

7.7 Hz, 1H), 2.24 (s, 3H); <sup>13</sup>C{<sup>1</sup>H} NMR (101 MHz, CDCl<sub>3</sub>) δ= 168.4, 138.9, 138.3, 129.4, 126.1, 122.2, 90.1, 25.0.

#### **1-(2-iodophenyl)-3-phenylurea (7o):** <sup>(18)</sup>

Following the general procedure E using 1,3-diphenylurea (47 mg, 0.22 mmol, 1 equiv.), BBr<sub>3</sub> (0.26 mmol, 1.2 equiv., 1M in CH<sub>2</sub>Cl<sub>2</sub>), at 40 °C for 16 h and Selectfluor (0.44 mmol, 2 equiv.), KI (0.48 mmol,

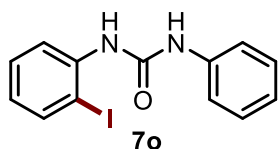

2.2 equiv.) at 60 °C for 5 h. The crude product was purified by automated column chromatography (pentane/EtOAc, 80:20) and the desired product was obtained as

an off white solid (47 mg, 63%); **Rf**: 0.53 (hexane/EtOAc, 70:30); <sup>1</sup>H NMR (400 MHz, dms<sup>o</sup>-d<sup>6</sup>) δ= 9.42 (bs, 1H), 7.88 (bs, 1H), 7.83 (dt, *J* = 8.2, 1.3 Hz, 2H),

7.47 (dd, *J* = 8.6, 1.2 Hz, 2H), 7.34 (ddd, *J* = 8.5, 7.3, 1.5 Hz, 1H), 7.29 (dd, *J* = 8.5, 7.3 Hz, 2H), 6.98 (tt, *J* = 7.4, 1.2 Hz, 1H), 6.84 (td, *J* = 7.7, 1.6 Hz, 1H); <sup>13</sup>C{<sup>1</sup>H} NMR (101 MHz, dms<sup>o</sup>-d<sup>6</sup>) δ= 152.4, 139.9, 139.6, 139.0, 128.9, 128.6, 125.1, 123.1, 122.0, 118.2, 91.4.

#### **1-(4-fluorophenyl)-3-(2-iodophenyl)urea (7p):**

Following the general procedure E using 1-(4-fluorophenyl)-3-phenylurea (51 mg, 0.22 mmol, 1 equiv.), BBr<sub>3</sub> (0.26 mmol, 1.2 equiv., 1M in CH<sub>2</sub>Cl<sub>2</sub>), at 40 °C for 16 h and Selectfluor (0.44 mmol, 2 equiv.), KI

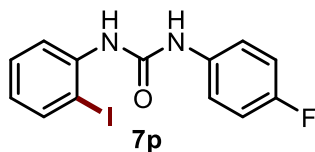

(0.48 mmol, 2.2 equiv.) at 60 °C for 5 h. The crude product was purified by automated column chromatography (pentane/EtOAc, 80:20) and the desired product was obtained as an off white solid (32 mg, 41%); **Rf**: 0.50

(hexane/EtOAc, 70:30); **Mp**: 224-226 °C; <sup>1</sup>H NMR (400 MHz, dms<sup>o</sup>-d<sup>6</sup>) δ= 9.45 (bs, 1H), 7.86 (bs, 1H), 7.83 (ddd, *J* = 8.2, 5.1, 1.5 Hz, 2H), 7.51 – 7.44 (m, 2H), 7.34 (ddd, *J* = 8.4, 7.3, 1.5 Hz, 1H), 7.17 – 7.09

(m, 2H), 6.84 (ddd,  $J = 7.8, 7.3, 1.6$  Hz, 1H);  $^{13}\text{C}\{^1\text{H}\}$  NMR (101 MHz,  $\text{dms}\text{-d}^6$ )  $\delta = 157.4$  (d,  $J = 238.1$  Hz), 152.5, 139.8, 139.0, 136.0 (d,  $J = 2.3$  Hz), 128.6, 125.1, 123.1, 119.9 (d,  $J = 7.7$  Hz), 115.4 (d,  $J = 22.2$  Hz), 91.5;  $^{19}\text{F}$  NMR (470 MHz,  $\text{dms}\text{-d}^6$ )  $\delta = -121.19$ ; IR (neat,  $\text{cm}^{-1}$ ) = 3278 (br), 2917 (w), 1643 (s), 1575 (m), 1568 (s), 1508 (s), 1288 (w), 1213 (w), 1015 (w), 747 (w), 668 (m); HRMS (ESI) (m/z): calculated for  $[\text{M}+\text{H}]^+ \text{C}_{13}\text{H}_{11}\text{FIN}_2\text{O}^+$  356.99; found 356.9912.

### 1-benzyl-3-(2-iodophenyl)urea (7q):<sup>(19)</sup>

Following the general procedure E using 1-benzyl-3-phenylurea (49.8 mg, 0.22 mmol, 1 equiv.),  $\text{BBr}_3$  (0.26 mmol, 1.2 equiv., 1M in  $\text{CH}_2\text{Cl}_2$ ), at 40 °C for 16 h and Selectfluor (0.44 mmol, 2 equiv.), KI (0.48

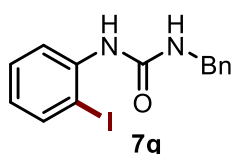

mmol, 2.2 equiv.) at 60 °C for 5 h. The crude product was purified by automated column chromatography (pentane/EtOAc, 80:20) and the desired product was obtained as an off white solid (27 mg, 35%); Rf: 0.5 (hexane/EtOAc, 70:30);  $^1\text{H}$  NMR (400 MHz, acetone  $\text{d}_6$ )  $\delta = 8.12$  (dd,  $J = 8.3, 1.6$  Hz, 1H), 7.79 (dd,  $J = 7.9,$

1.5 Hz, 1H), 7.40 – 7.27 (m, 6H), 7.28 – 7.20 (m, 1H), 7.01 (s, 1H), 6.77 (td,  $J = 7.6, 1.6$  Hz, 1H), 4.43 (d,  $J = 5.8$  Hz, 2H);  $^{13}\text{C}\{^1\text{H}\}$  NMR (101 MHz,  $\text{dms}\text{-d}^6$ )  $\delta = 155.7, 141.6, 141.0, 139.8, 129.5, 129.2, 128.3, 127.7, 125.0, 122.7, 89.6, 44.3$ .

### 1-(2-iodophenyl)-3-propylurea (7r):<sup>(20)</sup>

Following the general procedure E using 1-phenyl-3-propylurea (39.2 mg, 0.22 mmol, 1 equiv.),  $\text{BBr}_3$  (0.26 mmol, 1.2 equiv., 1M in  $\text{CH}_2\text{Cl}_2$ ), at 40 °C for 16 h and Selectfluor (0.44 mmol, 2 equiv.), KI (0.48

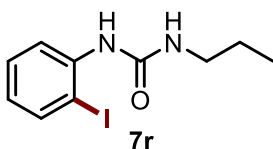

mmol, 2.2 equiv.) at 60 °C for 5 h. The crude product was purified by automated column chromatography (pentane/EtOAc, 80:20) and the desired product was obtained as an off white solid (24 mg, 36%); Rf: 0.4 (hexane/EtOAc, 70:30);  $^1\text{H}$  NMR (400 MHz,  $\text{CDCl}_3$ )  $\delta = 7.89$  (dd,  $J = 8.2, 1.6$  Hz, 1H), 7.75 (dd,  $J = 7.9, 1.5$

Hz, 1H), 7.29 (ddd,  $J = 8.4, 7.3, 1.5$  Hz, 1H), 6.77 (td,  $J = 7.6, 1.6$  Hz, 1H), 6.64 (bs, 1H), 5.15 (bs, 1H), 3.21 (t,  $J = 7.2$  Hz, 2H), 1.56 (h,  $J = 7.4$  Hz, 2H), 0.93 (t,  $J = 7.4$  Hz, 3H);  $^{13}\text{C}\{^1\text{H}\}$  NMR (101 MHz,  $\text{dms}\text{-d}^6$ )  $\delta = 155.4, 139.5, 139.1, 129.3, 125.3, 122.8, 91.6, 42.5, 23.4, 11.5$ .

### 5-(4-chlorophenyl)-N-(2-iodophenyl)furan-2-carboxamide (7s):

Following the general procedure E using 5-(4-chlorophenyl)-N-phenylfuran-2-carboxamide (45 mg, 0.15 mmol, 1 equiv.),  $\text{BBr}_3$  (0.18 mmol, 1.2 equiv., 1M in  $\text{CH}_2\text{Cl}_2$ ), at 40 °C for 16 h and Selectfluor (0.30

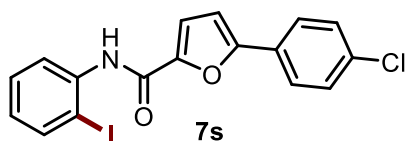

mmol, 2 equiv.), KI (0.33 mmol, 2.2 equiv.) at 60 °C for 5 h. The crude product was purified by automated column chromatography (pentane/EtOAc, 90:10) and the desired product was obtained as an off white solid (35 mg, 54%); Rf: 0.57 (hexane/EtOAc, 70:30); Mp: 190-

192 °C;  $^1\text{H}$  NMR (400 MHz,  $\text{CDCl}_3$ )  $\delta = 8.68$  (bs, 1H), 8.47 (dd,  $J = 8.3, 1.6$  Hz, 1H), 7.83 (dd,  $J = 7.9, 1.4$  Hz, 1H), 7.71 (d,  $J = 8.7$  Hz, 2H), 7.43 (d,  $J = 8.7$  Hz, 2H), 7.41 – 7.36 (m, 1H), 7.34 (d,  $J = 3.6$  Hz,

1H), 6.88 (ddd,  $J = 8.0, 7.3, 1.5$  Hz, 1H), 6.81 (d,  $J = 3.6$  Hz, 1H);  $^{13}\text{C}\{^1\text{H}\}$  NMR (101 MHz,  $\text{CDCl}_3$ )  $\delta = 155.9, 155.0, 146.8, 139.0, 138.0, 134.9, 129.6, 129.4, 128.0, 126.1, 125.9, 121.3, 117.9, 108.3, 89.8$ ; IR (neat,  $\text{cm}^{-1}$ ) = 3366 (br), 1684 (m), 1587 (m), 1539 (s), 1456 (w), 1431 (w), 1312 (m), 746 (w), 668 (s), 580 (w); HRMS (ESI) (m/z): calculated for  $[\text{M}+\text{H}]^+$   $\text{C}_{17}\text{H}_{12}\text{ClINO}_2^+$  423.9601; found 423.9608.

#### *N*-(2-iodophenyl)-5-(3-(trifluoromethyl)phenyl)furan-2-carboxamide (7t):

Following the general procedure E using *N*-phenyl-5-(3-(trifluoromethyl)phenyl)furan-2-carboxamide (50 mg, 0.15 mmol, 1 equiv.),  $\text{BBr}_3$  (0.18 mmol, 1.2 equiv., 1M in  $\text{CH}_2\text{Cl}_2$ ), at 40 °C for 16 h and

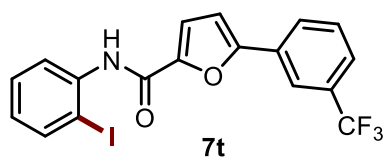

Selectfluor (0.30 mmol, 2 equiv.), KI (0.33 mmol, 2.2 equiv.) at 60 °C for 5 h. The crude product was purified by automated column chromatography (pentane/EtOAc, 90:10) and the desired product was obtained as an off white solid (38 mg, 54%); **Rf**: 0.40 (hexane/EtOAc,

80:20); **Mp**: 145-147 °C;  $^1\text{H}$  NMR (400 MHz,  $\text{CDCl}_3$ )  $\delta = 8.77$  (bs, 1H), 8.49 (dd,  $J = 8.2, 1.5$  Hz, 1H), 8.08 (tt,  $J = 1.7, 0.8$  Hz, 1H), 7.95 (dt,  $J = 7.1, 1.8$  Hz, 1H), 7.84 (dd,  $J = 7.9, 1.4$  Hz, 1H), 7.64 – 7.55 (m, 2H), 7.40 (ddd,  $J = 8.6, 7.2, 1.5$  Hz, 1H), 7.36 (d,  $J = 3.6$  Hz, 1H), 6.93 – 6.86 (m, 2H);  $^{13}\text{C}\{^1\text{H}\}$  NMR (101 MHz,  $\text{CDCl}_3$ )  $\delta = 155.7, 154.2, 147.2, 139.1, 137.9, 131.70$  (q,  $J = 32.6$  Hz), 130.3, 129.8, 129.7, 127.6, 126.7 (q,  $J = 272.7$  Hz), 126.1, 125.5 (q,  $J = 3.7$  Hz), 121.5 (q,  $J = 3.8$  Hz), 121.2, 117.7, 109.0, 89.6;  $^{19}\text{F}$  NMR (564 MHz,  $\text{CDCl}_3$ )  $\delta = -62.97$ ; IR (neat,  $\text{cm}^{-1}$ ) = 3357 (br), 2922 (w), 1684 (s), 1596 (s), 1508 (s), 1585 (s), 1539 (s), 1522 (s), 1433 (s), 1366 (s), 1311 (m), 1258 (m), 1120 (s), 806 (w), 750 (m), 668 (w); HRMS (ESI) (m/z): calculated for  $[\text{M}+\text{H}]^+$   $\text{C}_{18}\text{H}_{12}\text{F}_3\text{INO}_2^+$  457.9865; found 457.9865.

#### *N*-(2-iodophenyl)-4-(methylsulfonyl)benzamide (7u):

Following the general procedure E using 4-(methylsulfonyl)-*N*-phenylbenzamide (42 mg, 0.15 mmol, 1 equiv.),  $\text{BBr}_3$  (0.18 mmol, 1.2 equiv., 1M in  $\text{CH}_2\text{Cl}_2$ ), at 40 °C for 16 h and Selectfluor (0.30 mmol, 2

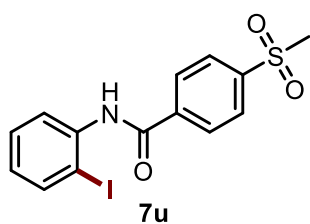

equiv.), KI (0.33 mmol, 2.2 equiv.) at 60 °C for 5 h. The crude product was purified by automated column chromatography (pentane/EtOAc, 85:15) and the desired product was obtained as an off white solid (44 mg, 72%); **Rf**: 0.23 (hexane/EtOAc, 60:40); **Mp**: 161-163 °C;  $^1\text{H}$  NMR (400 MHz,  $\text{CDCl}_3$ )  $\delta = 8.40$  (dd,  $J = 8.2, 1.5$  Hz, 1H), 8.29 (bs, 1H), 8.18 – 8.09 (m, 4H), 7.84 (dd,  $J = 8.0,$

1.4 Hz, 1H), 7.43 (ddd,  $J = 8.5, 7.3, 1.5$  Hz, 1H), 6.94 (ddd,  $J = 8.0, 7.4, 1.6$  Hz, 1H), 3.11 (s, 3H);  $^{13}\text{C}\{^1\text{H}\}$  NMR (101 MHz,  $\text{CDCl}_3$ )  $\delta = 163.7, 143.7, 139.5, 139.1, 137.7, 129.7, 128.4, 128.3, 126.9, 122.1, 90.7, 44.5$ ; IR (neat,  $\text{cm}^{-1}$ ) = 2923 (br), 1684 (m), 1653 (m), 1559 (m), 1521 (s), 1313 (s), 1297 (s), 1152 (s), 749 (w), 668 (s); HRMS (ESI) (m/z): calculated for  $[\text{M}+\text{H}]^+$   $\text{C}_{14}\text{H}_{13}\text{INO}_3\text{S}^+$  401.9661; found 401.9666.



#### ***N*-(2-iodo-4-tritylphenyl)benzamide (7v):**

Following the general procedure E using *N*-(4-tritylphenyl)benzamide (63 mg, 0.15 mmol, 1 equiv.), BBr<sub>3</sub> (0.18 mmol, 1.2 equiv., 1M in CH<sub>2</sub>Cl<sub>2</sub>), at 40 °C for 16 h and Selectfluor (0.30 mmol, 2 equiv.), KI (0.33

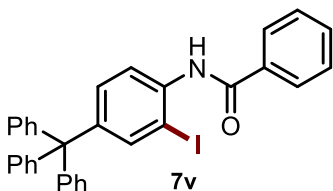

8.31 (d, *J* = 8.7 Hz, 1H), 8.26 (bs, 1H), 7.94 (dt, *J* = 7.1, 1.4 Hz, 2H), 7.68 (d, *J* = 2.3 Hz, 1H), 7.61 – 7.55 (m, 1H), 7.51 (dd, *J* = 8.2, 6.5 Hz, 2H), 7.28 – 7.23 (m, 7H), 7.23 – 7.18 (m, 9H); **<sup>13</sup>C{<sup>1</sup>H} NMR (101 MHz, CDCl<sub>3</sub>)** δ= 165.5, 146.3, 145.1, 140.6, 136.2, 134.6, 132.8, 132.4, 131.1, 129.1, 127.8, 127.3, 126.3, 120.5, 89.7, 64.4; **IR (neat, cm<sup>-1</sup>)** = 3388 (br), 2924 (m), 1684 (m), 1560 (m), 1508 (s), 1491 (s), 1300 (s), 748 (w), 701 (s), 667 (w); **HRMS (ESI) (m/z)**: calculated for [M+H]<sup>+</sup> C<sub>32</sub>H<sub>25</sub>INO<sup>+</sup> 566.0981; found 566.0983.

#### **4-(*N,N*-dipropylsulfamoyl)-*N*-(2-iodophenyl)benzamide (7w):**

Following the general procedure E using 4-(*N,N*-dipropylsulfamoyl)-*N*-phenylbenzamide (55 mg, 0.15 mmol, 1 equiv.), BBr<sub>3</sub> (0.18 mmol, 1.2 equiv., 1M in CH<sub>2</sub>Cl<sub>2</sub>), at 40 °C for 16 h and Selectfluor (0.30

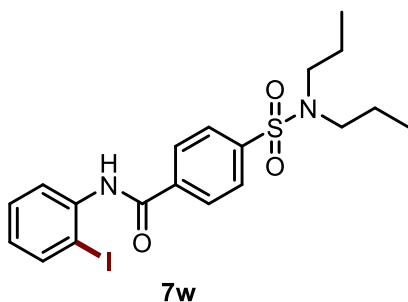

115-117 °C; **<sup>1</sup>H NMR (400 MHz, CDCl<sub>3</sub>)** δ= 8.41 (dd, *J* = 8.2, 1.5 Hz, 1H), 8.28 (s, 1H), 8.08 (d, *J* = 8.1 Hz, 2H), 7.96 (d, *J* = 8.2 Hz, 2H), 7.84 (dd, *J* = 8.0, 1.5 Hz, 1H), 7.47 – 7.37 (m, 1H), 6.92 (td, *J* = 7.6, 1.6 Hz, 1H), 3.12 (t, *J* = 7.4 Hz, 4H), 1.57 (h, *J* = 7.5 Hz, 4H), 0.89 (t, *J* = 7.4 Hz, 6H); **<sup>13</sup>C{<sup>1</sup>H} NMR (101 MHz, CDCl<sub>3</sub>)** δ= 164.0, 143.9, 139.1, 138.0, 137.9, 129.7, 128.0, 127.8, 126.7, 122.1, 90.6, 50.2, 22.2, 11.3; **IR (neat, cm<sup>-1</sup>)** = 3269 (br), 2922 (w), 2852 (w), 1651 (m), 1525 (m), 1500 (s), 1432 (m), 1312 (m), 1293 (m), 1232 (m), 850 (w), 756 (w), 651 (w); **HRMS (ESI) (m/z)**: calculated for [M+H]<sup>+</sup> C<sub>19</sub>H<sub>24</sub>IN<sub>2</sub>O<sub>3</sub>S<sup>+</sup> 487.0552; found 487,0555.

#### **1-(4-chlorophenyl)-*N*-(2-iodophenyl)cyclopentane-1-carboxamide (7x):**

Following the general procedure E using 1-(4-chlorophenyl)-*N*-phenylcyclopentane-1-carboxamide (65 mg, 0.22 mmol, 1 equiv.), BBr<sub>3</sub> (0.26 mmol, 1.2 equiv., 1M in CH<sub>2</sub>Cl<sub>2</sub>), at 40 °C for 16 h and Selectfluor (0.44 mmol, 2 equiv.), KI (0.48 mmol, 2.2 equiv.) at 60 °C for 5 h. The crude product was purified by automated column chromatography (pentane/EtOAc, 91:9) and the desired product was obtained as an

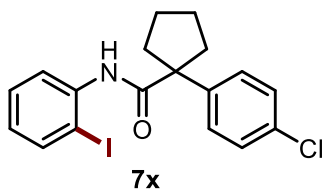

off white solid (74 mg, 80%); **Rf**: 0.48 (hexane/EtOAc, 90:10); **Mp**: 94-96 °C;  $^1\text{H NMR}$  (400 MHz,  $\text{CDCl}_3$ )  $\delta$ = 8.42 (dd,  $J$  = 8.3, 1.6 Hz, 1H), 7.95 (bs, 1H), 7.70 (dd,  $J$  = 7.9, 1.5 Hz, 1H), 7.37 – 7.33 (m, 13H), 7.30 (ddt,  $J$  = 6.8, 5.4, 2.3 Hz, 3H), 6.82 (td,  $J$  = 7.6, 1.6 Hz, 1H);  $^{13}\text{C}\{^1\text{H}\}$  NMR (101

MHz,  $\text{CDCl}_3$ )  $\delta$ = 172.1, 143.0, 139.1, 138.6, 130.9, 129.3, 128.4, 127.4, 126.1, 121.6, 89.3, 68.9; **IR** (neat,  $\text{cm}^{-1}$ ) = 3359 (br), 2955 (w), 1691 (s), 1579 (m), 1512 (s), 1429 (s), 1292 (m), 1012 (w), 752 (w), 668 (w); **HRMS (ESI) (m/z)**: calculated for  $[\text{M}+\text{H}]^+$   $\text{C}_{18}\text{H}_{18}\text{ClINO}^+$  426.0122; found 426.0121.

#### ***N*-(2-iodophenyl)-2,2,2-triphenylacetamide (7y):**<sup>(14)</sup>

Following the general procedure E using *N*,2,2,2-tetraphenylacetamide (56 mg, 0.15 mmol, 1 equiv.),  $\text{BBr}_3$  (0.18 mmol, 1.2 equiv., 1M in  $\text{CH}_2\text{Cl}_2$ ), at 40 °C for 16 h and Selectfluor (0.30 mmol, 2 equiv.), KI

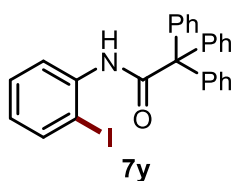

(0.33 mmol, 2.2 equiv.) at 60 °C for 5 h. The crude product was purified by automated column chromatography (pentane/EtOAc, 93:7) and the desired product was obtained as an off white solid (46 mg, 62%); **Rf**: 0.36 (hexane/EtOAc, 95:5);

$^1\text{H NMR}$  (400 MHz,  $\text{CDCl}_3$ )  $\delta$ = 8.42 (dd,  $J$  = 8.3, 1.6 Hz, 1H), 7.95 (bs, 1H), 7.70 (dd,  $J$  = 7.9, 1.5 Hz, 1H), 7.37 – 7.33 (m, 13H), 7.30 (ddt,  $J$  = 6.8, 5.4, 2.3 Hz, 3H), 6.82 (td,  $J$  = 7.6, 1.6 Hz, 1H);  $^{13}\text{C}\{^1\text{H}\}$  NMR (101 MHz,  $\text{CDCl}_3$ )  $\delta$ = 172.1, 143.0, 139.1, 138.6, 130.9, 129.3, 128.4, 127.4, 126.1, 121.6, 89.3, 68.9.

#### ***N*-(2-iodophenyl)-2-oxo-2-phenylacetamide (7z):**<sup>(21)</sup>

Following the general procedure E using 2-oxo-*N*,2-diphenylacetamide (51 mg, 0.22 mmol, 1 equiv.),  $\text{BBr}_3$  (0.26 mmol, 1.2 equiv., 1M in  $\text{CH}_2\text{Cl}_2$ ), at 40 °C for 16 h and Selectfluor (0.44 mmol, 2 equiv.), KI

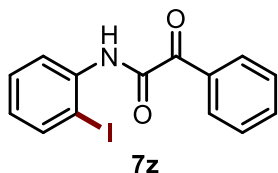

(0.48 mmol, 2.2 equiv.) at 60 °C for 5 h. The crude product was purified by automated column chromatography (pentane/EtOAc, 95:5) and the desired product was obtained as an off white solid (18 mg, 23%); **Rf**: 0.52 (hexane/EtOAc, 90:10);  $^1\text{H NMR}$  (400 MHz,  $\text{CDCl}_3$ )  $\delta$ = 9.45 (bs, 1H), 8.47 – 8.38 (m, 3H), 7.85 (dd,  $J$  = 8.0, 1.5 Hz, 1H), 7.71 – 7.64 (m, 1H), 7.53 (t,  $J$  = 7.8 Hz, 2H), 7.46 – 7.38 (m, 1H), 6.93 (td,  $J$  = 7.7, 1.6 Hz, 1H);  $^{13}\text{C}\{^1\text{H}\}$  NMR (101 MHz,  $\text{CDCl}_3$ )  $\delta$ = 186.9, 159.0, 139.4, 137.4, 134.9, 133.1, 131.6, 129.5, 128.8, 127.0, 121.5, 90.3.

#### **4.4 General Procedure F for Chlorination of *N*-phenylpivalamide:**

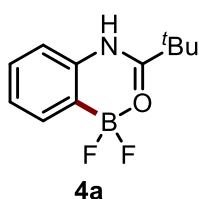

Chloramine T trihydrate (1 equiv.),  $\text{CH}_3\text{CN}:\text{Water}$ , 70 °C, 4 h

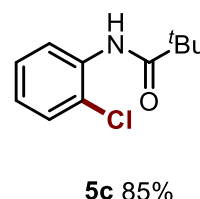

Step i) To a dry 3 mL, screw-top V-Vial, equipped with a stir bar, the difluoro boron complex (4a) (22.5 mg, 0.1 mmol, 1 equiv.) and Chloramine T Trihydrate (28.2 mg, 0.1 mmol, 1 equiv.). To this 0.7 mL



acetonitrile and 0.3 mL water was added and the reaction mixture was stirred at 70 °C for 4 h. The reaction was diluted with EtOAc (10 mL) and H<sub>2</sub>O (10 mL). The aqueous layer was washed with EtOAc (10 mL), and the combined organic layer was washed with brine, dried over sodium sulfate, filtered, and evaporated *in vacuo* to afford the crude product, which was purified using automated column chromatography (pentane/EtOAc 92:08) to afford the *N*-(2-chlorophenyl)pivalamide in 85% yield.

#### *N*-(2-chlorophenyl)pivalamide (**5c**):<sup>(14)</sup>

Following the general procedure F. The crude product was purified by automated column chromatography (pentane/EtOAc, 92:08) and the desired product was obtained as beige color solid (18 mg, 85%); **Rf**: 0.37

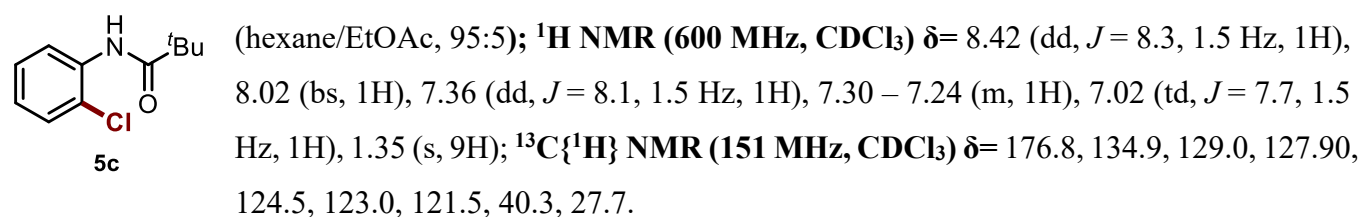

#### 4.5 General Procedure G for Bromination of *N*-phenylpivalamide

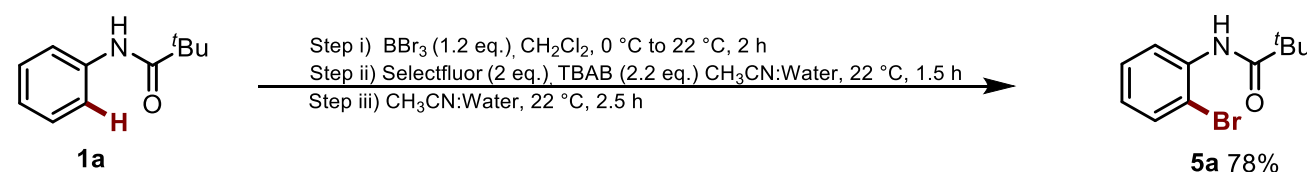

Step i) To a dry 5 mL, screw-top V-Vial, (Sigma Aldrich, Product code-Z115150-12EA), equipped with a rubber septum, stir bar, the *N*-phenylpivalamide (0.22 mmol, 1 equiv.) in anhydrous CH<sub>2</sub>Cl<sub>2</sub> (0.5 mL) under a nitrogen atmosphere was added dropwise BBr<sub>3</sub> (0.26 mmol, 1.2 equiv., 1M solution in CH<sub>2</sub>Cl<sub>2</sub>). After the complete addition of BBr<sub>3</sub>, the reaction mixture was stirred at 22 °C for 2 h after which the solvent was removed under reduced pressure.

Step ii) Simultaneously, selectfluor (0.44 mmol, 2 equiv.), and TBAB (0.48 mmol, 2.2 equiv.), were dissolved in CH<sub>3</sub>CN (1 mL) and water (0.5 mL) in a 3 mL, screw-top V-vial and the reaction mixture stirred at 22 °C for 1.5 h.

Step iii) The crude residue from step i) was dissolved in CH<sub>3</sub>CN (0.5 mL) and water (0.5 mL) at 0 °C. To this mixture, the solution from step ii) was added dropwise at 0 °C, and the reaction mixture was stirred at 22 °C for 2.5 h. The reaction was quenched with saturated sodium thiosulfite solution at room temperature and the crude mixture was dissolved in EtOAc (10 mL) and H<sub>2</sub>O (10 mL). The aqueous layer was washed with EtOAc (10 mL), and the combined organic layer was washed with brine, dried over sodium sulfate, filtered, and evaporated *in vacuo* to afford the crude product, which was purified using automated column chromatography (pentane/EtOAc) to afford the *N*-(2-bromophenyl)pivalamide in 78% yield.

### ***N*-(2-bromophenyl)pivalamide (5a):<sup>(8)</sup>**

Following the general procedure G using *N*-phenylpivalamide (39 mg, 0.22 mmol, 1 equiv.), BBr<sub>3</sub> (0.26 mmol, 1.2 equiv., 1M in CH<sub>2</sub>Cl<sub>2</sub>), at 22 °C for 2 h and Selectfluor (0.44 mmol, 2 equiv.), TBAB (0.48

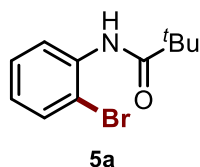

mmol, 2.2 equiv.) and step iii) at 22 °C for 2.5 h. The crude product was purified by automated column chromatography (pentane/EtOAc, 93:7) and the desired product was obtained as an off white solid (46 mg, 82%); **Rf**: 0.37 (hexane/EtOAc, 95:5); <sup>1</sup>H NMR (400 MHz, CDCl<sub>3</sub>) δ= 8.39 (dd, *J* = 8.3, 1.6 Hz, 1H), 8.01 (bs, 1H), 7.52 (dd, *J* = 8.0, 1.5 Hz, 1H), 7.31 (ddd, *J* = 8.7, 7.2, 1.5 Hz, 1H), 6.96 (ddd, *J* = 8.1, 7.4, 1.6 Hz, 1H), 1.35 (s, 9H); <sup>13</sup>C{<sup>1</sup>H} NMR (101 MHz, CDCl<sub>3</sub>) δ= 176.8, 136.0, 132.2, 128.5, 125.0, 121.7, 113.7, 40.3, 27.7.

### **4.6 General Procedure H for reaction optimization: Bromination of benzanilide derivatives**

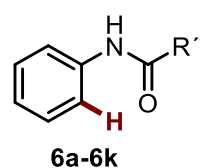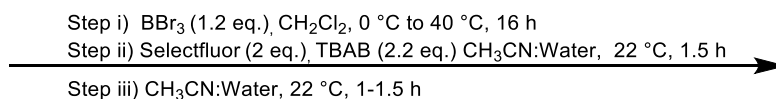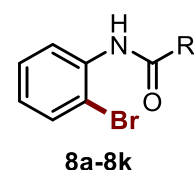

Step i) To a dry 5 mL, screw-top V-Vial, (Sigma Aldrich, Product code-Z115150-12EA), equipped with a rubber septum, stir bar, the amide derivative (0.22 mmol, 1 equiv.) in anhydrous CH<sub>2</sub>Cl<sub>2</sub> (0.5 mL) under a nitrogen atmosphere was added dropwise BBr<sub>3</sub> (0.26 mmol, 1.2 equiv., 1M solution in CH<sub>2</sub>Cl<sub>2</sub>). After the complete addition of BBr<sub>3</sub>, the reaction mixture was stirred at 40 °C for 16 h after which the solvent was removed under reduced pressure.

Step ii) Simultaneously, selectfluor (0.44 mmol, 2 equiv.), and TBAB (0.48 mmol, 2.2 equiv.), were dissolved in CH<sub>3</sub>CN (1 mL) and water (0.5 mL) in a 3 mL, screw-top V-vial and the reaction mixture stirred at 22 °C for 1.5 h.

Step iii) The crude residue from step i) was dissolved in CH<sub>3</sub>CN (0.5 mL) and water (0.5 mL) at 0 °C. To this mixture, the solution from step ii) was added dropwise at 0 °C, and the reaction mixture was stirred at 22 °C for 1-1.5 h. The reaction was quenched with saturated sodium thiosulfite solution at room temperature and the crude mixture was dissolved in EtOAc (10 mL) and H<sub>2</sub>O (10 mL). The aqueous layer was washed with EtOAc (10 mL), and the combined organic layer was washed with brine, dried over sodium sulfate, filtered, and evaporated *in vacuo* to afford the crude product, which was purified using automated column chromatography (pentane/EtOAc).

### ***N*-(2-bromophenyl)benzamide (8a):<sup>(11)</sup>**

Following the general procedure H using *N*-phenylbenzamide (44 mg, 0.22 mmol, 1 equiv.), BBr<sub>3</sub> (0.26 mmol, 1.2 equiv., 1M in CH<sub>2</sub>Cl<sub>2</sub>), at 40 °C for 16 h and Selectfluor (0.44 mmol, 2

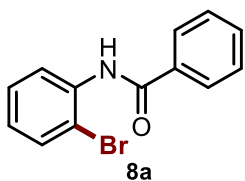

equiv.), TBAB (0.48 mmol, 2.2 equiv.) at 22 °C for 1 h. The crude product was purified by automated column chromatography (pentane/EtOAc, 94:6) and the desired product was obtained as an off white solid (45 mg, 73%); **Rf**: 0.25

(hexane/EtOAc, 95:5);  $^1\text{H NMR}$  (400 MHz,  $\text{CDCl}_3$ )  $\delta$ = 8.56 (dd,  $J$  = 8.3, 1.6 Hz, 1H), 8.48 (s, 1H), 7.97 – 7.91 (m, 2H), 7.61 – 7.56 (m, 2H), 7.55 – 7.50 (m, 2H), 7.38 (ddd,  $J$  = 8.6, 7.4, 1.5 Hz, 1H), 7.02 (ddd,  $J$  = 8.0, 7.4, 1.6 Hz, 1H);  $^{13}\text{C}\{^1\text{H}\}$  NMR (101 MHz,  $\text{CDCl}_3$ )  $\delta$ = 165.4, 135.9, 134.7, 132.4, 132.3, 129.1, 128.7, 127.2, 125.4, 121.8, 113.9.

***N*-(2-bromophenyl)-4-methylbenzamide (8b):**<sup>(12)</sup>

Following the general procedure H using 4-methyl-*N*-phenylbenzamide (47 mg, 0.22 mmol, 1 equiv.),  $\text{BBr}_3$  (0.26 mmol, 1.2 equiv., 1M in  $\text{CH}_2\text{Cl}_2$ ), at 40 °C for 16 h and Selectfluor (0.44 mmol, 2 equiv.),

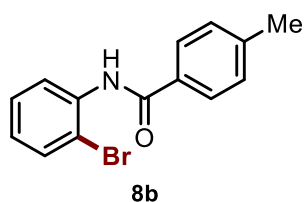

TBAB (0.48 mmol, 2.2 equiv.) at 22 °C for 1 h. The crude product was purified by automated column chromatography (pentane/EtOAc, 94:6) and the desired product was obtained as an off white solid (48 mg, 74%); **Rf**: 0.28 (hexane/EtOAc, 95:5);  $^1\text{H NMR}$  (400 MHz,  $\text{CDCl}_3$ )  $\delta$ = 8.47 (dd,  $J$  = 8.2, 1.6 Hz, 1H), 8.27 (bs, 1H), 7.87 (d,  $J$  = 7.9 Hz, 2H), 7.81 (dd,  $J$  = 8.0, 1.5 Hz, 1H),

7.44 – 7.37 (m, 1H), 7.33 (d,  $J$  = 7.9 Hz, 2H), 6.88 (td,  $J$  = 7.6, 1.6 Hz, 1H), 2.44 (s, 3H);  $^{13}\text{C}\{^1\text{H}\}$  NMR (101 MHz,  $\text{CDCl}_3$ )  $\delta$ = 165.4, 142.9, 138.9, 138.5, 131.8, 129.8, 129.5, 127.3, 126.0, 121.8, 90.3, 21.7.

***N*-(2-bromophenyl)-3-methylbenzamide (8c):**<sup>(22)</sup>

Following the general procedure H using 3-methyl-*N*-phenylbenzamide (47 mg, 0.22 mmol, 1 equiv.),  $\text{BBr}_3$  (0.26 mmol, 1.2 equiv., 1M in  $\text{CH}_2\text{Cl}_2$ ), at 40 °C for 16 h and Selectfluor (0.44 mmol, 2 equiv.),

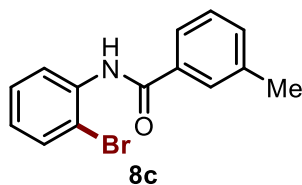

TBAB (0.48 mmol, 2.2 equiv.) at 22 °C for 1 h. The crude product was purified by automated column chromatography (pentane/EtOAc, 94:6) and the desired product was obtained as a off white solid (46 mg, 71%); **Rf**: 0.33 (hexane/EtOAc, 95:5);  $^1\text{H NMR}$  (400 MHz,  $\text{CDCl}_3$ )  $\delta$ = 8.55 (dd,  $J$  = 8.3, 1.6

Hz, 1H), 8.45 (bs, 1H), 7.76 (s, 1H), 7.74 – 7.66 (m, 1H), 7.58 (dd,  $J$  = 8.0, 1.5 Hz, 1H), 7.38 (q,  $J$  = 6.5 Hz, 3H), 7.01 (td,  $J$  = 7.7, 1.6 Hz, 1H), 2.45 (s, 3H);  $^{13}\text{C}\{^1\text{H}\}$  NMR (101 MHz,  $\text{CDCl}_3$ )  $\delta$ = 165.6, 139.0, 136.0, 134.7, 133.1, 132.4, 128.9, 128.7, 128.1, 125.3, 124.1, 121.9, 113.8, 21.6.

***N*-(2-bromophenyl)-4-fluorobenzamide (8d):**<sup>(23)</sup>

Following the general procedure H using 4-fluoro-*N*-phenylbenzamide (47 mg, 0.22 mmol, 1 equiv.),  $\text{BBr}_3$  (0.26 mmol, 1.2 equiv., 1M in  $\text{CH}_2\text{Cl}_2$ ), at 40 °C for 16 h and Selectfluor (0.44 mmol, 2 equiv.),

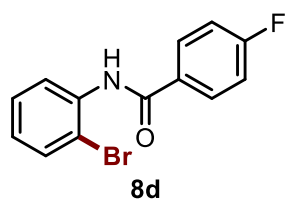

TBAB (0.48 mmol, 2.2 equiv.) at 22 °C for 1 h. The crude product was purified by automated column chromatography (pentane/EtOAc, 94:6) and the desired product was obtained as an off white solid (45.5 mg, 71%); **Rf**: 0.25 (hexane/EtOAc, 95:5);  $^1\text{H NMR}$  (400 MHz,  $\text{CDCl}_3$ )  $\delta$ = 8.51 (dd,  $J$  = 8.3, 1.6

Hz, 1H), 8.39 (bs, 1H), 8.01 – 7.91 (m, 2H), 7.58 (dd,  $J$  = 8.0, 1.5 Hz, 1H), 7.42 – 7.33 (m, 1H), 7.20 (t,  $J$  = 8.6 Hz, 2H), 7.02 (td,  $J$  = 7.7, 1.6 Hz, 1H);  $^{13}\text{C}\{^1\text{H}\}$  NMR (101 MHz,  $\text{CDCl}_3$ )  $\delta$ = 165.2 (d,  $J$  = 253.5

Hz), 164.3, 135.8, 132.4, 130.9 (d,  $J = 3.1$  Hz), 129.6 (d,  $J = 9.0$  Hz), 128.7, 125.5, 121.9, 116.2 (d,  $J = 22.1$  Hz), 113.9;  $^{19}\text{F}$  NMR (470 MHz,  $\text{CDCl}_3$ )  $\delta = -106.79$ .

### 2-bromo-*N*-(2-bromophenyl)benzamide (8f):<sup>(14)</sup>

Following the general procedure H using 2-bromo-*N*-phenylbenzamide (60.3 mg, 0.22 mmol, 1 equiv.),  $\text{BBr}_3$  (0.26 mmol, 1.2 equiv., 1M in  $\text{CH}_2\text{Cl}_2$ ), at 40 °C for 16 h and Selectfluor (0.44 mmol, 2 equiv.),

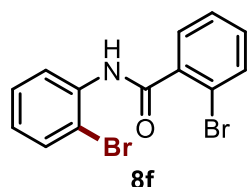

TBAB (0.48 mmol, 2.2 equiv.) at 22 °C for 1 h. The crude product was purified by

automated column chromatography (pentane/EtOAc, 92:8) and the desired product

was obtained as an off white solid (33 mg, 42%); **Rf**: 0.2 (hexane/EtOAc, 95:5);  $^1\text{H}$

NMR (700 MHz,  $\text{CDCl}_3$ )  $\delta = 8.54$  (d,  $J = 8.3$  Hz, 1H), 8.16 (bs, 1H), 7.67 (dt,  $J =$

8.1, 1.7 Hz, 2H), 7.58 (dd,  $J = 8.0, 1.5$  Hz, 1H), 7.44 (t,  $J = 7.0$  Hz, 1H), 7.41 – 7.37 (m, 1H), 7.35 (td,  $J = 7.7, 1.7$  Hz, 1H), 7.04 (td,  $J = 7.7, 1.6$  Hz, 1H);  $^{13}\text{C}\{^1\text{H}\}$  NMR (176 MHz,  $\text{CDCl}_3$ )  $\delta = 165.6, 137.7, 135.6, 133.9, 132.6, 132.0, 129.8, 128.6, 127.9, 125.8, 122.2, 119.5, 113.8$ .

### *N*-(2-bromophenyl)-4-(trifluoromethyl)benzamide (8h):<sup>(24)</sup>

Following the general procedure H using *N*-phenyl-4-(trifluoromethyl)benzamide (58 mg, 0.22 mmol, 1 equiv.),  $\text{BBr}_3$  (0.26 mmol, 1.2 equiv., 1M in  $\text{CH}_2\text{Cl}_2$ ), at 40 °C for 16 h and Selectfluor (0.44 mmol, 2

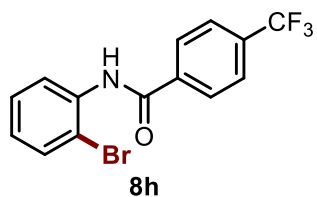

equiv.), TBAB (0.48 mmol, 2.2 equiv.) and step iii) at 40 °C for 1.5 h. The

crude product was purified by automated column chromatography

(pentane/EtOAc, 94:6) and the desired product was obtained as a off white

solid (31 mg, 41%); **Rf**: 0.27 (hexane/EtOAc, 95:5);  $^1\text{H}$  NMR (400 MHz,

$\text{CDCl}_3$ )  $\delta = 8.53$  (dd,  $J = 8.3, 1.6$  Hz, 1H), 8.46 (bs, 1H), 8.05 (d,  $J = 8.1$  Hz, 2H), 7.79 (d,  $J = 8.2$  Hz, 2H), 7.60 (dd,  $J = 8.1, 1.5$  Hz, 1H), 7.40 (td,  $J = 7.8, 1.5$  Hz, 1H), 7.06 (td,  $J = 7.7, 1.6$  Hz, 1H);  $^{13}\text{C}\{^1\text{H}\}$  NMR (101 MHz,  $\text{CDCl}_3$ )  $\delta = 164.1, 138.0, 135.5, 134.0$  (q,  $J = 32.8$  Hz), 132.5, 128.8, 127.7, 126.2 (q,  $J = 3.7$  Hz), 125.9, 123.7 (q,  $J = 272.6$  Hz) 122.0, 114.0;  $^{19}\text{F}$  NMR (470 MHz,  $\text{CDCl}_3$ )  $\delta = -63.03$ .

### *N*-(2-bromophenyl)-3-nitrobenzamide (8i):<sup>(22)</sup>

Following the general procedure H using 3-nitro-*N*-phenylbenzamide (53.4 mg, 0.22 mmol, 1 equiv.),  $\text{BBr}_3$  (0.26 mmol, 1.2 equiv., 1M in  $\text{CH}_2\text{Cl}_2$ ), at 40 °C for 16 h and Selectfluor (0.44 mmol, 2 equiv.),

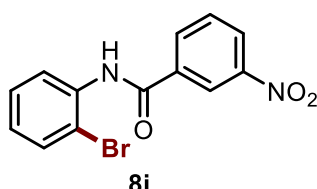

TBAB (0.48 mmol, 2.2 equiv.) at 22 °C for 1 h. The crude product was purified

by automated column chromatography (pentane/EtOAc, 85:15) and the

desired product was obtained as an off white solid (57 mg, 81%); **Rf**: 0.17

(hexane/EtOAc, 90:10);  $^1\text{H}$  NMR (400 MHz,  $\text{CDCl}_3$ )  $\delta = 8.78$  (t,  $J = 2.0$  Hz,

1H), 8.47 (dd,  $J = 8.1, 1.6$  Hz, 2H), 8.44 (ddd,  $J = 8.2, 2.3, 1.0$  Hz, 1H), 8.26 (ddd,  $J = 7.8, 1.8, 1.0$  Hz, 1H), 7.74 (t,  $J = 8.0$  Hz, 1H), 7.60 (dd,  $J = 8.0, 1.4$  Hz, 1H), 7.39 (ddd,  $J = 8.6, 7.5, 1.5$  Hz, 1H), 7.07 (ddd,  $J = 8.0, 7.4, 1.6$  Hz, 1H);  $^{13}\text{C}\{^1\text{H}\}$  NMR (101 MHz,  $\text{CDCl}_3$ )  $\delta = 163.0, 148.6, 136.3, 135.2, 133.0, 132.5, 130.4, 128.8, 126.8, 126.2, 122.4, 122.2, 114.3$ .

***N*-(2-bromophenyl)furan-2-carboxamide (8j):**<sup>(25)</sup>

Following the general procedure H using *N*-phenylfuran-2-carboxamide (41 mg, 0.22 mmol, 1 equiv.), BBr<sub>3</sub> (0.26 mmol, 1.2 equiv., 1M in CH<sub>2</sub>Cl<sub>2</sub>), at 40 °C for 16 h and Selectfluor (0.44 mmol, 2 equiv.),

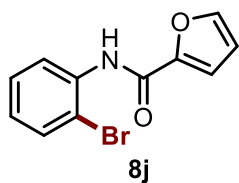

TBAB (0.48 mmol, 2.2 equiv.) at 22 °C for 1 h. The crude product was purified by automated column chromatography (pentane/EtOAc, 94:6) and the desired product

was obtained as an off white solid (43 mg, 74%); **Rf**: 0.25 (hexane/EtOAc, 95:5); **<sup>1</sup>H**

**NMR (400 MHz, CDCl<sub>3</sub>)** δ= 8.71 (bs, 1H), 8.50 (dt, *J* = 8.3, 1.8 Hz, 1H), 7.57 (dq,

*J* = 8.0, 1.4 Hz, 2H), 7.39 – 7.31 (m, 1H), 7.29 – 7.24 (m, 1H), 7.00 (dd, *J* = 7.9, 1.4 Hz, 1H), 6.58 (dq, *J* = 3.0, 1.6 Hz, 1H); **<sup>13</sup>C{<sup>1</sup>H} NMR (101 MHz, CDCl<sub>3</sub>)** δ= 156.0, 147.8, 144.8, 135.5, 132.5, 128.6, 125.4, 121.7, 115.8, 113.6, 112.8.

***N*-(2-bromophenyl)thiophene-2-carboxamide (8k):**<sup>(26)</sup>

Following the general procedure H using *N*-phenylthiophene-2-carboxamide (44 mg, 0.22 mmol, 1 equiv.), BBr<sub>3</sub> (0.26 mmol, 1.2 equiv., 1M in CH<sub>2</sub>Cl<sub>2</sub>), at 40 °C for 16 h and Selectfluor (0.44 mmol, 2 equiv.),

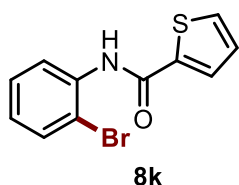

TBAB (0.48 mmol, 2.2 equiv.) at 22 °C for 1 h. The crude product was purified by

automated column chromatography (pentane/EtOAc, 94:6) and the desired product

was obtained as an off white solid (46 mg, 75%); **Rf**: 0.27 (hexane/EtOAc, 95:5); **<sup>1</sup>H**

**NMR (400 MHz, CDCl<sub>3</sub>)** δ= 8.48 (dd, *J* = 8.3, 1.6 Hz, 1H), 8.34 (bs, 1H), 7.68 (dd,

*J* = 3.8, 1.2 Hz, 1H), 7.61 – 7.53 (m, 2H), 7.36 (td, *J* = 7.9, 1.5 Hz, 1H), 7.16 (dd, *J* = 5.0, 3.7 Hz, 1H), 7.01 (td, *J* = 7.7, 1.6 Hz, 1H); **<sup>13</sup>C{<sup>1</sup>H} NMR (101 MHz, CDCl<sub>3</sub>)** δ= 159.7, 139.2, 135.6, 132.4, 131.5, 128.7, 128.7, 128.1, 125.4, 121.7, 113.6.

## 5. Applications

### Synthesis of 3,3-dimethyl-3,4-dihydroquinolin-2(1H)-one (9a)<sup>(27)</sup>

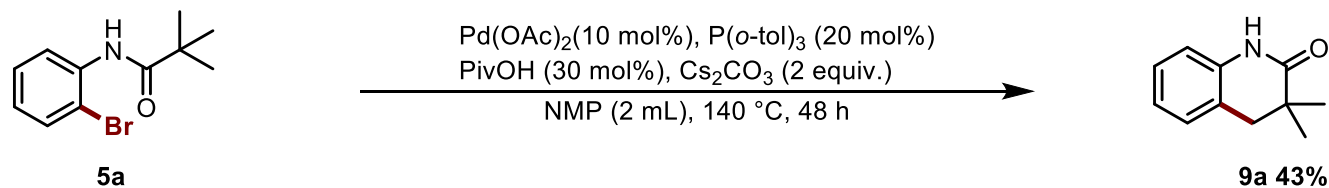

To a 10 mL seal tube, Pd(OAc)<sub>2</sub> (4.5 mg, 0.02 mmol), P(*o*-tol)<sub>3</sub> (12.2 mg, 0.04 mmol), Cs<sub>2</sub>CO<sub>3</sub> (130.3 mg, 0.40 mmol) were added respectively. Then PivOH (6.1 mg, 0.06 mmol, ~ 6.7  $\mu$ L) was added to the tube with a micro injector. A solution of N-(2-bromophenyl)pivalamide (51 mg, 0.20 mmol) in NMP (2.0 mL) was added by a syringe and the reaction was stirred at 140 °C for 48 hours. After the reaction was finished, the reaction mixture was cooled to room temperature and filtered through a celite pad using EtOAc as the eluent. The reaction mixture was concentrated under reduced pressure, and the resulting mixture was purified by automated column chromatography (pentane/EtOAc, 80:20) and the desired product was obtained as a beige color solid (43%).

**Spectral data:** <sup>1</sup>H NMR (700 MHz, CDCl<sub>3</sub>)  $\delta$ = 7.94 (bs, 1H), 7.17 (td, *J* = 7.6, 1.5 Hz, 1H), 7.14 (d, *J* = 7.5 Hz, 1H), 6.98 (td, *J* = 7.4, 1.2 Hz, 1H), 6.74 (dd, *J* = 7.9, 1.2 Hz, 1H), 2.80 (s, 2H), 1.21 (s, 6H); <sup>13</sup>C{<sup>1</sup>H} NMR (176 MHz, CDCl<sub>3</sub>)  $\delta$ = 176.7, 137.0, 128.6, 127.5, 123.5, 123.1, 114.7, 40.4, 37.5, 24.5.

### Synthesis of methyl 11-oxo-5,11-dihydrobenzo[4,5]imidazo[1,2-*b*]isoquinoline-6-carboxylate (9b)<sup>(28)</sup>

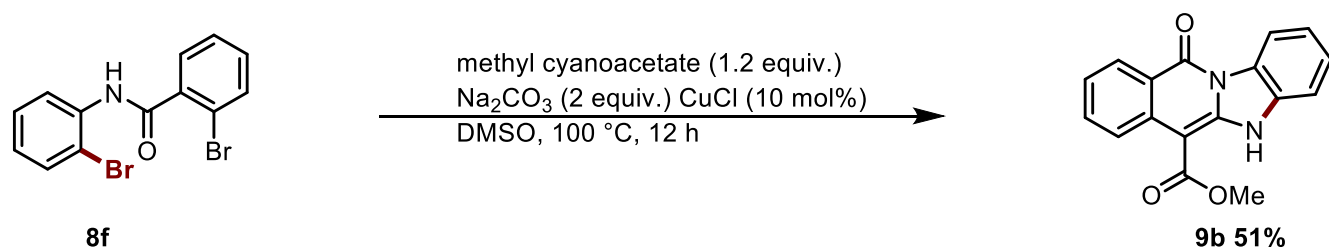

To a 10 mL seal tube, 2-bromo-N-(2-bromophenyl)benzamide (35.5 mg, 0.1 mmol,) methyl cyanacetate (0.12 mmol), Na<sub>2</sub>CO<sub>3</sub> (0.2 mmol) were dissolved in 1 mL DMSO and the mixture was stirred at room temperature for 10 min. Then CuCl (0.01 mmol) was added, and the mixture was stirred at 100 °C for 12 h. After conforming with the TLC, the mixture was filtered, washed with ethyl acetate and concentrated under reduced pressure, and the resulting mixture was purified by automated column chromatography (pentane/EtOAc, 80:20) and the desired product was obtained as a beige color solid (51%).

**Spectral data:** <sup>1</sup>H NMR (400 MHz, CDCl<sub>3</sub>)  $\delta$ = 11.25 (bs, 1H), 8.76 (dd, *J* = 15.1, 8.3 Hz, 2H), 8.57 (dd, *J* = 8.2, 1.6 Hz, 1H), 7.72 (ddd, *J* = 8.6, 6.9, 1.6 Hz, 1H), 7.47 (t, *J* = 7.0 Hz, 1H), 7.42 – 7.33 (m, 3H),

4.06 (s, 3H);  $^{13}\text{C}\{^1\text{H}\}$  NMR (101 MHz,  $\text{CDCl}_3$ )  $\delta$ = 168.9, 160.2, 147.0, 135.5, 133.6, 131.0, 128.3, 128.0, 126.6, 124.6, 123.5, 122.9, 119.5, 117.3, 110.2, 82.6, 51.8.

### Synthesis of 14*H*-dibenzo[4,5:6,7]azepino[2,1-*a*]isoindol-14-one (9c)<sup>(29)</sup>

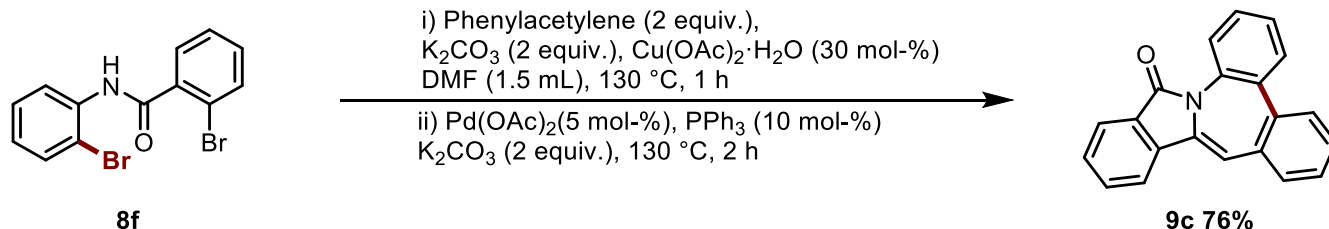

To a oven-dried 10 mL round-bottomed flask, 2-bromo-N-(2-bromophenyl)benzamide (35.5 mg, 0.1 mmol,) phenylacetylene (22  $\mu\text{l}$ , 0.2 mmol),  $\text{Cu}(\text{OAc})_2 \cdot \text{H}_2\text{O}$  (6.0 mg, 30 mol-%),  $\text{K}_2\text{CO}_3$  (27.6 mg, 0.2 mmol) were dissolved in 1 mL DMF and the mixture was stirred at 130 °C for 1 h. Then  $\text{Pd}(\text{OAc})_2$  (1.1 mg, 5 mol-%) and  $\text{PPh}_3$  (2.6 mg, 10 mol-%) were added to the reaction mixture at ambient temperature and stirring was continued while heating at 130 °C for another 2 h. After 2 h, the reaction mixture was cooled to room temperature, diluted with water (10 mL) and extracted with EtOAc (2  $\times$  10 mL). The combined organic layers were dried with anhydrous sodium sulfate and concentrated under reduced pressure. The resulting mixture was purified by automated column chromatography (pentane/EtOAc, 85:15) and the desired product was obtained as a off white solid (22.5 mg, 76%).

**Spectral data:**  $^1\text{H}$  NMR (400 MHz,  $\text{CDCl}_3$ )  $\delta$ = 7.96 (d,  $J$  = 7.6 Hz, 1H), 7.77 (dd,  $J$  = 8.1, 1.4 Hz, 1H), 7.73 (d,  $J$  = 7.8 Hz, 1H), 7.65 (t,  $J$  = 8.1 Hz, 1H), 7.58 – 7.50 (m, 2H), 7.39 (dd,  $J$  = 7.7, 1.9 Hz, 1H), 7.35 (dd,  $J$  = 8.1, 1.9 Hz, 1H), 7.29 (tt,  $J$  = 7.1, 2.1 Hz, 3H), 7.17 (dd,  $J$  = 7.2, 1.9 Hz, 1H), 6.58 (s, 1H);  $^{13}\text{C}\{^1\text{H}\}$  NMR (101 MHz,  $\text{CDCl}_3$ )  $\delta$ = 168.9, 144.6, 140.6, 138.4, 137.0, 135.7, 133.5, 132.9, 132.9, 130.5, 129.9, 129.3, 128.9, 128.6, 128.5, 128.2, 127.1, 124.0, 123.9, 118.6, 112.3.

### Synthesis of (9*H*-carbazol-9-yl)(phenyl)methanone (9d)<sup>(30)</sup>

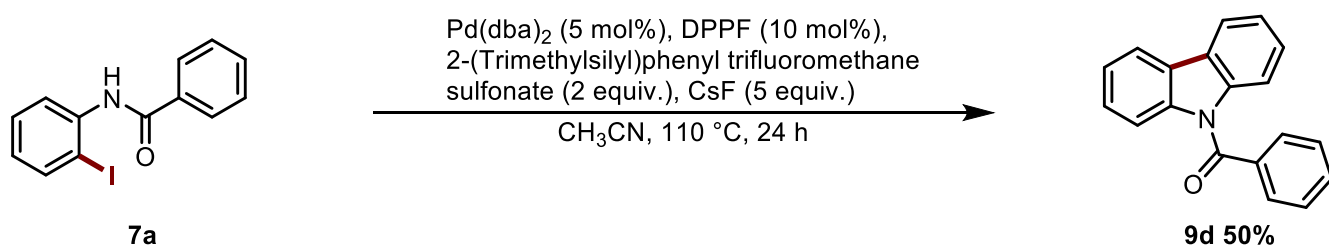

To the seal tube, N-(2-iodophenyl)benzamide (7a) (80.78 mg, 0.25 mmol, 1 equiv.), 2-(Trimethylsilyl)phenyltrifluoromethane sulfonate (121.4  $\mu\text{l}$ , 0.5 mmol, 2.0 equiv.), CsF (190 mg, 1.25 mmol, 5.0 equiv.),  $\text{Pd}(\text{dba})_2$  (7.19 mg, 5 mol %), dppf (14 mg, 10 mol %), 8 mL of toluene, and 2 mL of MeCN were taken under nitrogen. The reaction mixture was stirred, first, at room temperature for 1 min and then heated to 110 °C for 24 h. The mixture was allowed to cool to room temperature, diluted with ethyl acetate, washed



with brine, dried over anhydrous  $\text{MgSO}_4$ , and concentrated under reduced pressure. The resulting mixture was purified by automated column chromatography (pentane/EtOAc, 90:10) and the desired product was obtained as a beige color solid (50%).

**Spectral data:**  $^1\text{H NMR}$  (700 MHz,  $\text{CDCl}_3$ )  $\delta$ = 8.02 (dd,  $J$  = 7.4, 1.9 Hz, 2H), 7.73 (dd,  $J$  = 7.9, 1.4 Hz, 2H), 7.67 – 7.64 (m, 1H), 7.55 – 7.51 (m, 4H), 7.36 (td,  $J$  = 7.4, 1.2 Hz, 2H), 7.33 (td,  $J$  = 7.7, 1.5 Hz, 2H);  $^{13}\text{C}\{^1\text{H}\}$  NMR (176 MHz,  $\text{CDCl}_3$ )  $\delta$ = 169.8, 139.3, 135.9, 132.5, 129.2, 129.0, 126.9, 126.2, 123.5, 120.0, 115.9.

### Synthesis of 1-phenyl-1,3-dihydro-2H-benzo[d]imidazol-2-one (9e)<sup>(31)</sup>

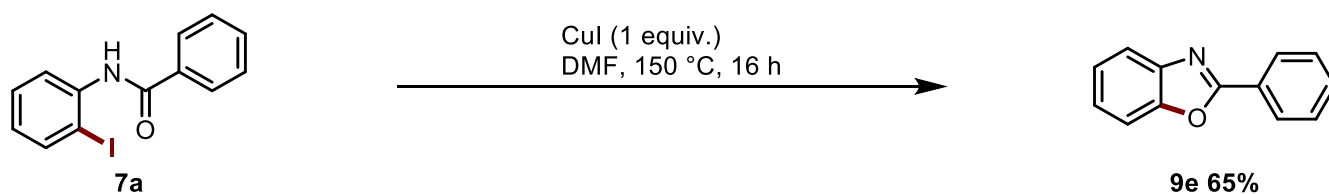

To a 5 mL seal tube, N-(2-iodophenyl)benzamide (51 mg, 0.15 mmol), CuI (33.6 mg, 0.17 mmol), and DMF (1 mL) were added respectively. Then the reaction was stirred at 140 °C for 16 h. After the reaction was finished, the reaction mixture was cooled to room temperature and filtered through a celite pad using EtOAc as the eluent. The reaction mixture was concentrated under reduced pressure, and the resulting mixture was purified by automated column chromatography (pentane/EtOAc, 95:5) and the desired product was obtained as a an off white solid (65%).

**Spectral data:**  $^1\text{H NMR}$  (700 MHz,  $\text{CDCl}_3$ )  $\delta$ = 8.27 (dd,  $J$  = 7.2, 2.5 Hz, 2H), 7.79 (dd,  $J$  = 6.1, 3.2 Hz, 1H), 7.59 (d,  $J$  = 9.2 Hz, 1H), 7.53 (d,  $J$  = 6.8 Hz, 3H), 7.36 (dd,  $J$  = 6.0, 3.1 Hz, 2H);  $^{13}\text{C}\{^1\text{H}\}$  NMR (176 MHz,  $\text{CDCl}_3$ )  $\delta$ = 163.2, 150.9, 142.2, 131.7, 129.1, 127.8, 127.3, 125.3, 124.7, 120.2, 110.7.

### Synthesis of 5-chloro-2-(p-tolyl)benzo[d]oxazole (9f)<sup>(31)</sup>

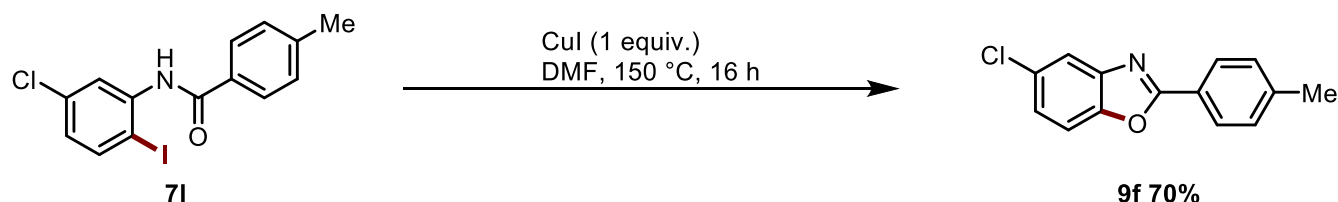

To a 5 mL seal tube, N-(5-chloro-2-iodophenyl)-4-methylbenzamide (56 mg, 0.15 mmol), CuI (33.6 mg, 0.17 mmol), and DMF (1 mL) were added respectively. Then the reaction was stirred at 140 °C for 16 h. After the reaction was finished, the reaction mixture was cooled to room temperature and filtered through a celite pad using EtOAc as the eluent. The reaction mixture was concentrated under reduced pressure, and the resulting mixture was purified by automated column chromatography (pentane/EtOAc, 95:5) and the desired product was obtained as a an off white solid (70%).



**Spectral data:**<sup>(32)</sup>  $^1\text{H NMR}$  (400 MHz,  $\text{CDCl}_3$ )  $\delta$ = 8.10 (d,  $J$  = 7.8 Hz, 2H), 7.71 (d,  $J$  = 2.1 Hz, 1H), 7.46 (dd,  $J$  = 8.6, 1.0 Hz, 1H), 7.32 (d,  $J$  = 8.0 Hz, 2H), 7.29 (ddd,  $J$  = 8.6, 2.1, 0.8 Hz, 1H), 2.43 (s, 3H);  $^{13}\text{C}\{^1\text{H}\}$  NMR (101 MHz,  $\text{CDCl}_3$ )  $\delta$ = 164.7, 149.4, 143.4, 142.7, 130.0, 129.8, 127.8, 125.2, 124.0, 119.9, 111.3, 21.8.

### Synthesis of 1-phenyl-1,3-dihydro-2H-benzo[d]imidazol-2-one (9g)<sup>(33)</sup>

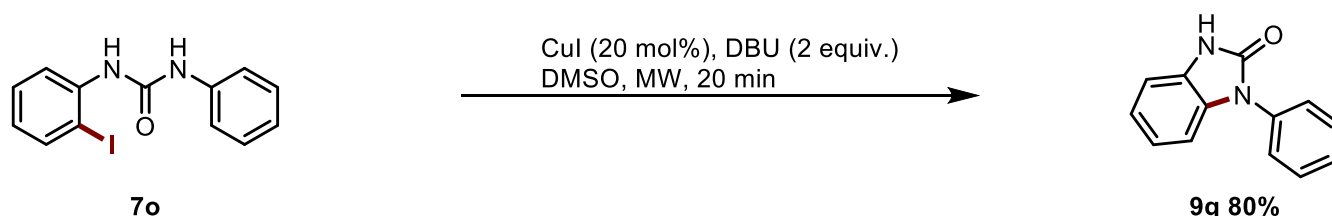

To a microwave vial, 1-(2-iodophenyl)-3-phenylurea (34 mg, 1.0 mmol), CuI (3.83 mg, 0.020 mmol), and DBU (29.85  $\mu\text{l}$ , 0.2 mmol) were added respectively. DMSO (0.2 mL) was added by a syringe and the reaction was stirred at 120  $^\circ\text{C}$  for 20 min under microwave irradiation. After the reaction was finished, the reaction mixture was cooled to room temperature and filtered through a celite pad using EtOAc as the eluent. mixture was purified by column chromatography using (pentane/EtOAc, 70:30) as the eluent. The reaction mixture was concentrated under reduced pressure, and the resulting mixture was purified by automated column chromatography (pentane/EtOAc, 70:30) and the desired product was obtained as a an off white solid (80%).

**Spectral data:**  $^1\text{H NMR}$  (400 MHz,  $\text{CDCl}_3$ )  $\delta$ = 10.54 (bs, 1H), 7.61 – 7.54 (m, 4H), 7.45 (dt,  $J$  = 5.1, 3.4 Hz, 1H), 7.17 (dt,  $J$  = 7.7, 1.0 Hz, 1H), 7.13 – 7.08 (m, 1H), 7.06 (dd,  $J$  = 4.1, 0.9 Hz, 2H);  $^{13}\text{C}\{^1\text{H}\}$  NMR (101 MHz,  $\text{CDCl}_3$ )  $\delta$ = 155.3, 134.5, 130.6, 129.8, 128.2, 128.1, 126.4, 122.4, 121.6, 110.2, 109.0.

### Synthesis of 5-methyl-1-morpholino-7,7-diphenyl-5,7-dihydro-6H-dibenzo[b,d]azepin-6-one (9h)<sup>(34)</sup>

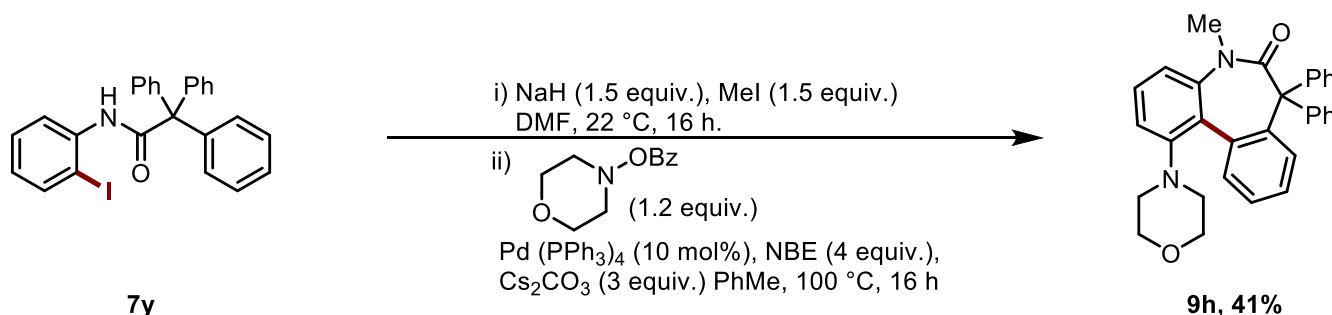

First step: In a 5 mL round bottom flask, *N*-(2-iodophenyl)-2,2,2-triphenylacetamide (36.36 mg, 0.01 mmol) was stirred in 2 mL dry DMF at 0  $^\circ\text{C}$ . Sodium hydride, 60% dispersion in mineral oil (6mg, 1.5 equiv.) was added followed by iodomethane (9.3  $\mu\text{l}$ , 1.5 equiv.) five min. later and the reaction was stirred at room temperature for 16 h. The reaction was quenched with cold brine and extracted three times with

---

EtOAc. The organic layer was dried over sodium sulfate, filtered and concentrated under reduced pressure. The resulting mixture was purified by filtration through silica.

Second step: Vials and stir bars were dried in 110 °C oven overnight prior to use. Two dry 5 mL, screw-top V-Vial, (Sigma Aldrich, Product code-Z115150-12EA), one equipped with a stir bar and one without were cooled to room temperature while under argon flow. Norbornene (41.43 mg, 0.44 mmol) was weighed in the vial without stir bar. Cesium carbonate (97.76 mg, 0.3 mmol), *N*-(2-iodophenyl)-*N*-methyl-2,2,2-triphenylacetamide from first step, morpholinobenzoate (24.87 mg, 0.12 mmol) and tetrakis(triphenylphosphine)palladium(0) (11.56 mg, 0.01 mmol) were added in that order to the vial with stir bar. 2.2 mL of freshly distilled toluene were added via syringe to the norbornene-containing vial and the latter was sonicated for 15 s to make sure all the norbornene was fully dissolved. 2 mL of the resulting solution were transferred via syringe to the other vial. The vial was equipped with a Teflon-sealed cap and immediately stirred at 100 °C for 16 h. The reaction was passed through a silica pad washing with ethyl acetate. The filtrate was concentrated under reduced pressure and the resulting residue and the resulting mixture was purified by automated column chromatography (pentane/EtOAc, 85:15) and the desired product was obtained as a an off white solid (19 mg, 41%).

**Spectral data:**  $^1\text{H NMR}$  (400 MHz,  $\text{CDCl}_3$ )  $\delta$ = 8.23 (dd,  $J$  = 7.8, 1.5 Hz, 1H), 7.37 – 7.24 (m, 7H), 7.06 – 6.95 (m, 4H), 6.92 – 6.85 (m, 2H), 6.70 (dd,  $J$  = 7.5, 2.5 Hz, 1H), 6.67 (dd,  $J$  = 8.2, 1.1 Hz, 1H), 6.50 (dd,  $J$  = 8.1, 1.1 Hz, 1H), 3.62 – 3.53 (m, 4H), 3.40 (s, 3H), 2.65 (m, 2H), 2.53 (m, 2H);  $^{13}\text{C}\{^1\text{H}\}$  NMR (101 MHz,  $\text{CDCl}_3$ )  $\delta$ = 173.6, 149.0, 142.9, 142.8, 141.6, 139.4, 134.2, 131.5, 130.0, 128.78, 128.7, 128.5, 128.1, 127.6, 127.4, 127.4, 126.9, 126.9, 126.5, 126.1, 116.5, 115.0, 67.3, 66.8, 51.0, 39.2.

## 6. Synthesis of difluoro boracycle (4a)

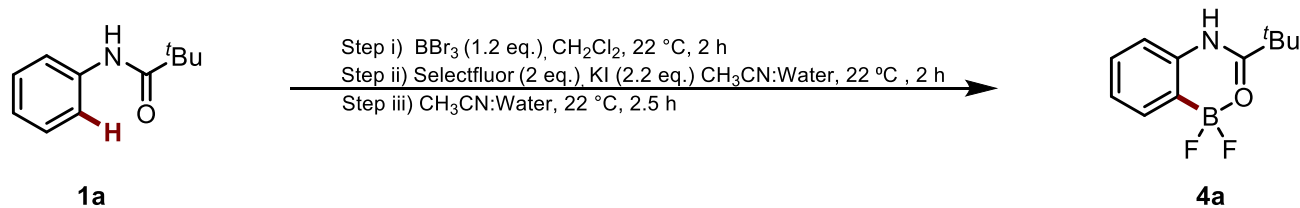

Step i) To a dry 5 mL, screw-top V-Vial, (Sigma Aldrich, Product code-Z115150-12EA), equipped with a rubber septum, stir bar, the amide derivative (0.22 mmol, 1 equiv.) in anhydrous  $\text{CH}_2\text{Cl}_2$  (0.5 mL) under a nitrogen atmosphere was added dropwise  $\text{BBr}_3$  (0.26 mmol, 1.2 equiv., 1M solution in  $\text{CH}_2\text{Cl}_2$ ). After the complete addition of  $\text{BBr}_3$ , the reaction mixture was stirred at 22 °C for 2 h after which the solvent was removed under reduced pressure.

Step ii) Simultaneously, Selectfluor (0.44 mmol, 2 equiv.), and KI (0.48 mmol, 2.2 equiv.), were dissolved in  $\text{CH}_3\text{CN}$  (1 mL) and water (1 mL) in a 3 mL, screw-top V-vial and the reaction mixture stirred at 22 °C for 2 h.

Step iii) The crude residue from step i) was dissolved in  $\text{CH}_3\text{CN}$  (0.5 mL). To this mixture, the solution from step ii) was added dropwise at 22 °C, and the reaction mixture was heated at 22 °C for 2.5 h. The reaction was quenched with saturated sodium thiosulfite solution at room temperature and the crude mixture was dissolved in EtOAc (10 mL) and  $\text{H}_2\text{O}$  (10 mL). The aqueous layer was washed with EtOAc (10 mL), and the combined organic layer was washed with brine, dried over sodium sulfate, filtered, and evaporated *in vacuo* to afford the crude product, which was purified using automated column chromatography (pentane/EtOAc, 80:20) to afford an off white solid (20 mg, 40%).

**Spectral data:** Rf: 0.41 (hexane/EtOAc, 50:50); M.P: 235-237 °C;  $^1\text{H}$  NMR (600 MHz,  $\text{dms}\text{-d}^6$ )  $\delta$ = 11.75 (s, 1H), 7.45 (d,  $J$  = 8.1 Hz, 2H), 7.37 (td,  $J$  = 7.6, 1.6 Hz, 1H), 7.28 (td,  $J$  = 7.3, 1.1 Hz, 1H), 1.37 (s, 9H);  $^{13}\text{C}\{^1\text{H}\}$  NMR (151 MHz,  $\text{dms}\text{-d}^6$ )  $\delta$ = 178.0, 136.5, 130.6, 128.2, 127.0, 117.0, 38.5, 26.6;  $^{19}\text{F}$  NMR (564 MHz,  $\text{dms}\text{-d}^6$ )  $\delta$ = -129.60 (d,  $J$  = 40.8 Hz);  $^{11}\text{B}$  NMR (193 MHz,  $\text{dms}\text{-d}^6$ )  $\delta$ = 2.38; HRMS (ESI) (m/z): calculated for  $[\text{M}-\text{H}]^- \text{C}_{11}\text{H}_{14}\text{BF}_2\text{NO}^+$  224.1058; found 224.1069.

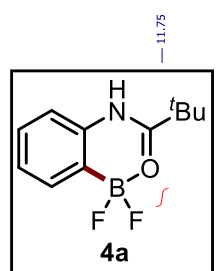

<sup>1</sup>H NMR 600 MHz

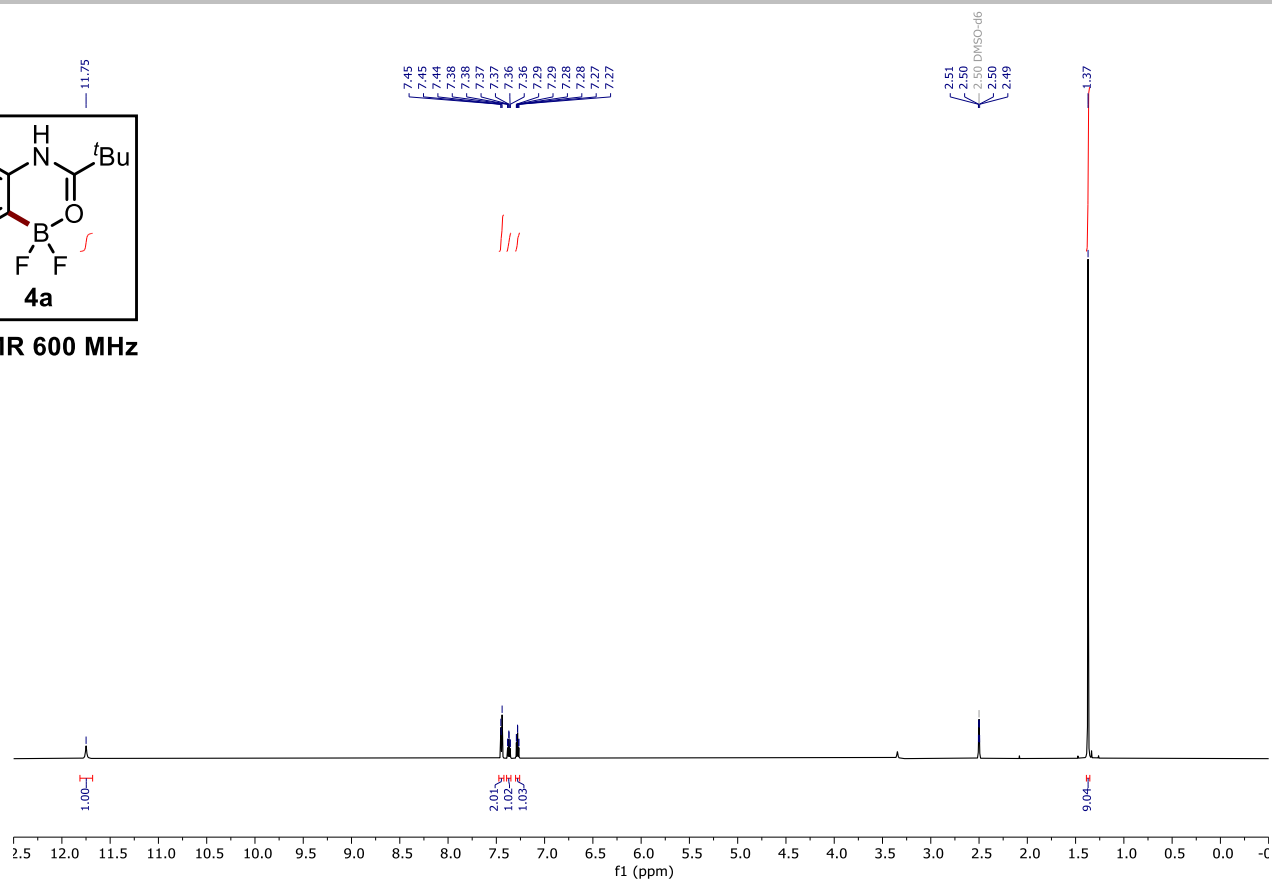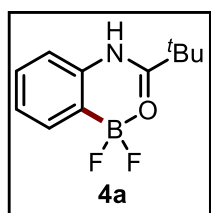

<sup>13</sup>C NMR 151 MHz

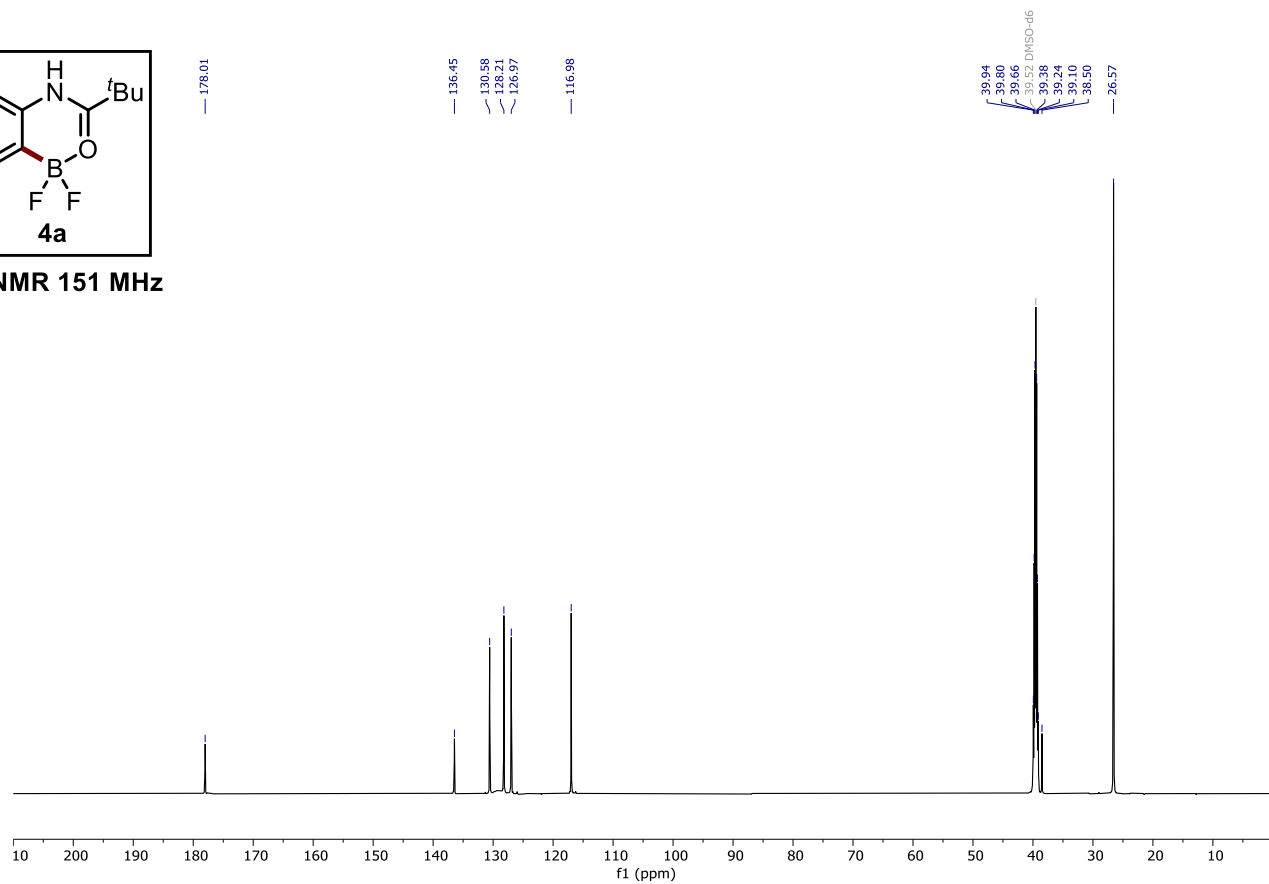

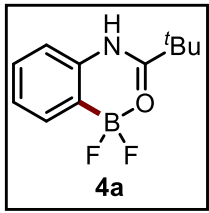

<sup>19</sup>F NMR 564 MHz

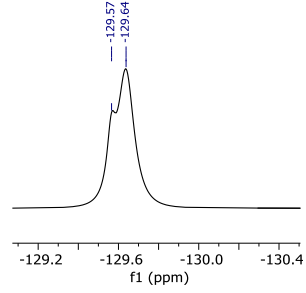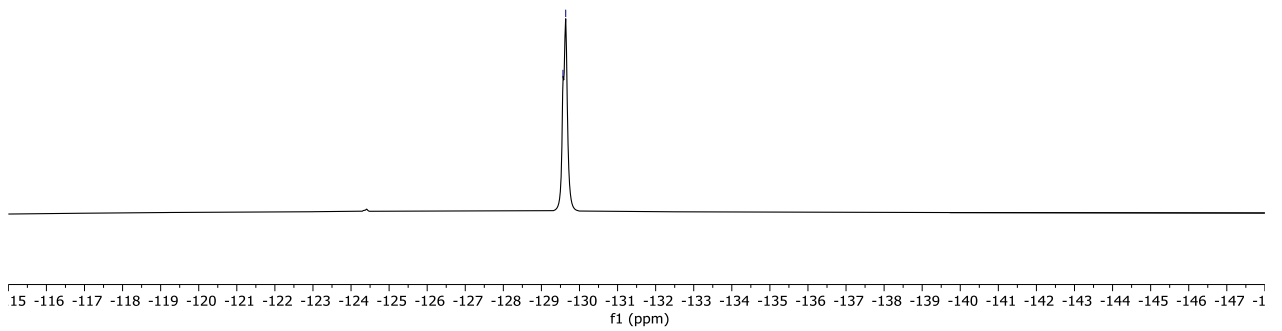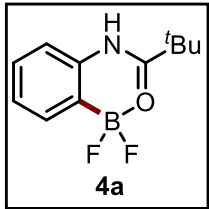

<sup>11</sup>B NMR 193 MHz

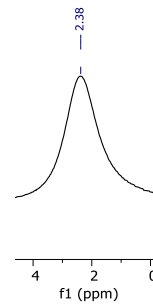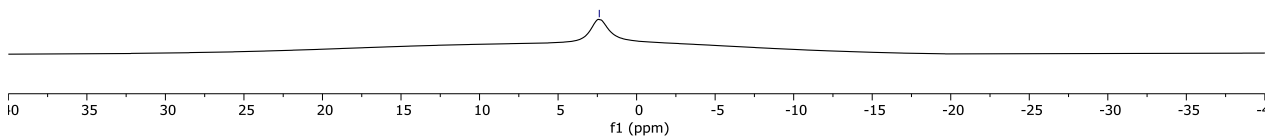

## 7. Gram scale experiment

### Synthesis of N-(2-iodophenyl)pivalamide (3a)

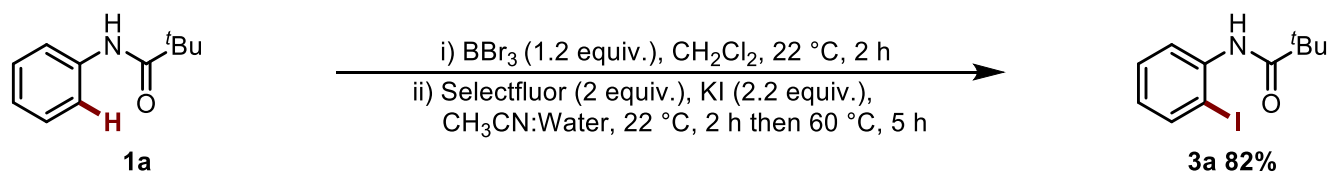

Step i) To a dry 50 mL, seal tube equipped with a rubber septum, stir bar, under a nitrogen atmosphere, the N-phenylpivalamide (1g, 5.64 mmol, 1 equiv.), was taken in anhydrous CH<sub>2</sub>Cl<sub>2</sub> (10 mL). To this mixture, BBr<sub>3</sub> (6.77 mL, 6.77 mmol, 1.2 equiv., 1M solution in CH<sub>2</sub>Cl<sub>2</sub>), was added dropwise. After the complete addition of BBr<sub>3</sub>, the reaction mixture was stirred at 22 °C for 2 h. The solvent was evaporated under reduced pressure.

In the meantime, step ii) was set up in a 25 mL round bottom flask, in which Selectfluor (11.28 mmol, 2 equiv.), and KI (12.41 mmol, 2.2 equiv.), were dissolved in CH<sub>3</sub>CN (15 mL) and water (15 mL) and the reaction mixture stirred at 22 °C for 2 h.

Step iii) The crude residue from step i) was dissolved in CH<sub>3</sub>CN (5 mL). To this residual mixture, step ii) solution was added dropwise at 22 °C, and the reaction mixture was heated at 60 °C for 5 h. The reaction was quenched with sat. sodium thiosulfite solution at room temperature and the crude mixture was dissolved in EtOAc (50 mL) and H<sub>2</sub>O (50 mL). The aqueous layer was washed with EtOAc (2 x 30 mL), and the combined organic layer was washed with brine, dried over sodium sulfate, filtered, and evaporated *in vacuo* to afford the crude product, which was purified using automated column chromatography (pentane/EtOAc, 90:10).

## 8. Computational details

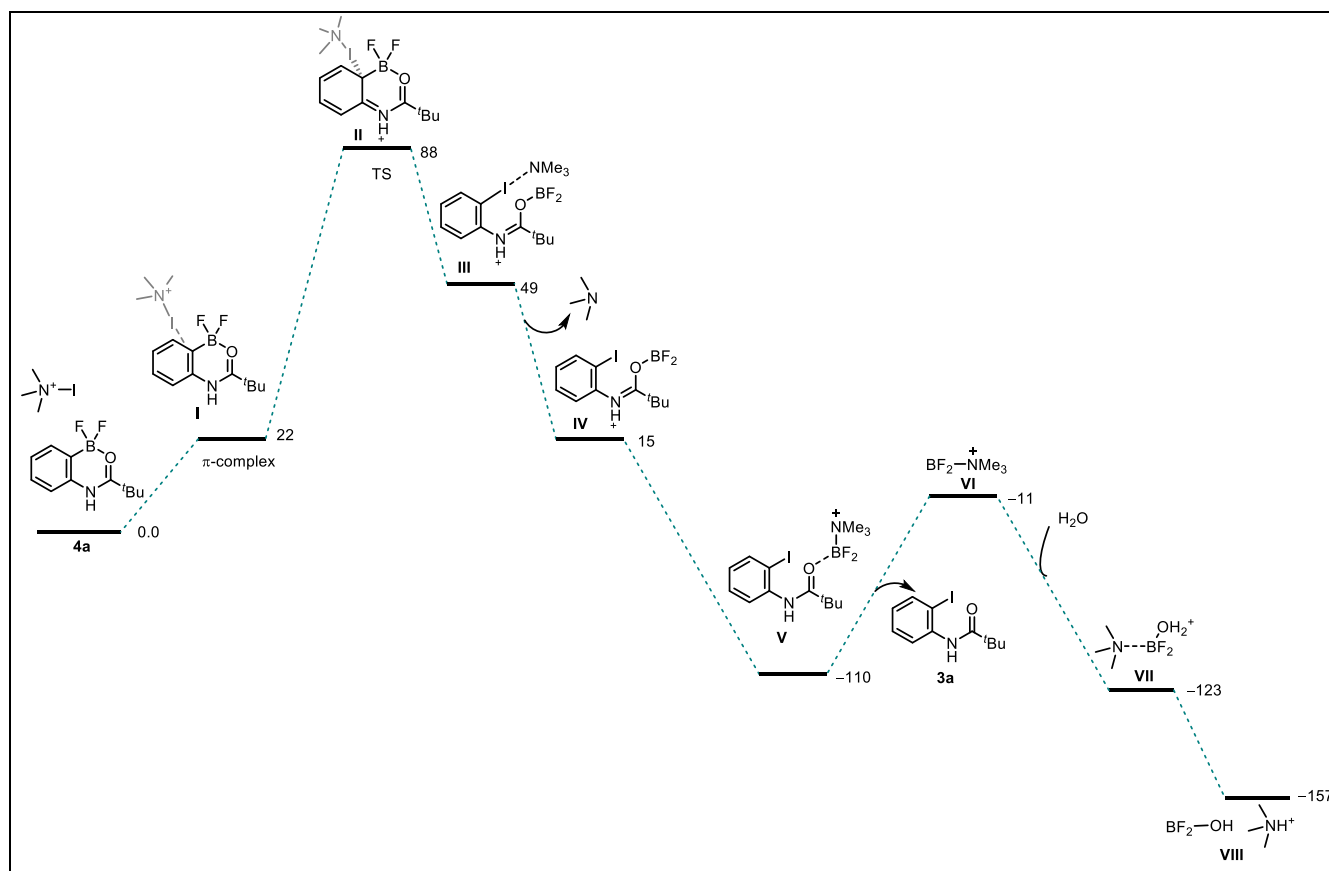

### Neutral water

File: jag\_H<sub>2</sub>O\_opt\_wB97X-D\_LACVPs/jag\_H<sub>2</sub>O\_opt\_wB97X-D\_LACVPs.out; structure: final

Method: DFT(wb97x-d)/lacvp\*; Solvent: water

Total Quantum Mechanical Energy: -76.4227396101 au

Solution phase energy: -76.39989734098 au

Gibbs free energy: -76.396899 au

Low frequencies 1788.02 3740.03 3832.78

|    |               |               |              |
|----|---------------|---------------|--------------|
| O1 | -0.0671053953 | -0.0078280998 | 0.0000000000 |
| H2 | 0.6204661612  | -0.6917206505 | 0.0000000000 |
| H3 | 0.4445451591  | 0.8159582756  | 0.0000000000 |

### Iodine carrier model, cationic I-NMe<sub>3</sub>

File: jag\_I-NMe<sub>3</sub>\_cat\_opt\_wB97X-D\_LACVPs/jag\_I-NMe<sub>3</sub>\_cat\_opt\_wB97X-D\_LACVPs.out;  
structure: final

Method: DFT(wb97x-d)/lacvp\*; Solvent: water

Total Quantum Mechanical Energy: -185.727034921 au

Solution phase energy: -185.63252451833 au

---

Gibbs free energy: -185.536758 au

Low frequencies 264.04 277.11 279.00 279.34 343.95 344.13

|     |               |               |               |
|-----|---------------|---------------|---------------|
| I1  | 0.0000000000  | -0.0000000000 | -0.8088211765 |
| N2  | 0.0000000000  | -0.0000000000 | 1.3504658552  |
| C3  | 1.2328461702  | -0.7117840682 | 1.8334430317  |
| H4  | 1.2114464826  | -0.6994289528 | 2.9286218295  |
| H5  | 1.2210115718  | -1.7410717142 | 1.4674808863  |
| H6  | 2.1183181202  | -0.1868911824 | 1.4674808863  |
| C7  | -0.0000000000 | 1.4235681365  | 1.8334430317  |
| H8  | 0.0000000000  | 1.3988579056  | 2.9286218295  |
| H9  | 0.8973065484  | 1.9279628966  | 1.4674808863  |
| H10 | -0.8973065484 | 1.9279628966  | 1.4674808863  |
| C11 | -1.2328461702 | -0.7117840682 | 1.8334430317  |
| H12 | -1.2114464826 | -0.6994289528 | 2.9286218295  |
| H13 | -2.1183181202 | -0.1868911824 | 1.4674808863  |
| H14 | -1.2210115718 | -1.7410717142 | 1.4674808863  |

**Start: BF<sub>2</sub> intermediate**

File: jag\_4a\_opt\_wB97X-D\_LACVPs/jag\_4a\_opt\_wB97X-D\_LACVPs.out; structure: final

Method: DFT(wb97x-d)/lacvp\*; Solvent: water

Total Quantum Mechanical Energy: -782.11089357 au

Solution phase energy: -782.07289788573 au

Gibbs free energy: -781.865946 au

Low frequencies 69.15 90.82 116.59 143.44 172.03 225.67

|     |               |              |              |
|-----|---------------|--------------|--------------|
| C1  | 1.1510942645  | 0.8603169971 | 0.0000000000 |
| C2  | -0.0543119976 | 1.5652931794 | 0.0000000000 |
| C3  | 0.0334781344  | 2.9627583604 | 0.0000000000 |
| C4  | 1.2604108676  | 3.6194696071 | 0.0000000000 |
| C5  | 2.4446883042  | 2.8791711697 | 0.0000000000 |
| C6  | 2.3967027360  | 1.4905753926 | 0.0000000000 |
| B7  | -1.4509192202 | 0.7847490810 | 0.0000000000 |
| H8  | -0.8835310586 | 3.5484542037 | 0.0000000000 |
| H9  | 1.2984764132  | 4.7053985341 | 0.0000000000 |
| H10 | 3.4063404288  | 3.3841854346 | 0.0000000000 |
| H11 | 3.3116278109  | 0.9018917037 | 0.0000000000 |



---

|     |               |               |               |
|-----|---------------|---------------|---------------|
| F12 | -2.2251590689 | 0.9947894716  | -1.1431864940 |
| F13 | -2.2251590689 | 0.9947894716  | 1.1431864940  |
| H14 | 2.0124705299  | -1.0440504475 | 0.0000000000  |
| N15 | 1.1177359269  | -0.5589304159 | 0.0000000000  |
| C16 | 0.0055569309  | -1.2810882744 | 0.0000000000  |
| O17 | -1.1437922544 | -0.7415078708 | 0.0000000000  |
| C18 | 0.0976657978  | -2.7997656947 | 0.0000000000  |
| C19 | -1.3151583435 | -3.3991818468 | 0.0000000000  |
| H20 | -1.2360559114 | -4.4915416921 | 0.0000000000  |
| H21 | -1.8791568931 | -3.0935804786 | 0.8867922026  |
| H22 | -1.8791568931 | -3.0935804786 | -0.8867922026 |
| C23 | 0.8527552738  | -3.2478332305 | -1.2682858923 |
| H24 | 0.8832274585  | -4.3423982269 | -1.2963401420 |
| H25 | 0.3436701627  | -2.8940971808 | -2.1720170790 |
| H26 | 1.8860081306  | -2.8830322758 | -1.2872023366 |
| C27 | 0.8527552738  | -3.2478332305 | 1.2682858923  |
| H28 | 0.8832274585  | -4.3423982269 | 1.2963401420  |
| H29 | 1.8860081306  | -2.8830322758 | 1.2872023366  |
| H30 | 0.3436701627  | -2.8940971808 | 2.1720170790  |

### pi complex

File: jag\_4a\_I\_NMe3\_ipso\_pi\_opt\_wB97X-D\_LACVPs\_2/jag\_4a\_I\_NMe3\_ipso\_pi\_opt\_wB97X-D\_LACVPs\_2.out; structure: final

Method: DFT(wb97x-d)/lacvp\*; Solvent: water

Total Quantum Mechanical Energy: -967.834458377 au

Solution phase energy: -967.71934920983 au

Gibbs free energy: -967.394383 au

Low frequencies 55.02 59.44 63.85 67.47 73.41 86.98

|    |               |               |               |
|----|---------------|---------------|---------------|
| I1 | 2.6295550000  | -2.0969280000 | -0.4513360000 |
| C2 | -1.3827340000 | -3.5599760000 | -2.3426780000 |
| C3 | -1.5755960000 | -2.7475900000 | -1.2244350000 |
| C4 | -0.7733080000 | -3.0121310000 | -0.1088030000 |
| C5 | 0.1707820000  | -4.0427290000 | -0.1119290000 |
| C6 | 0.3378490000  | -4.8309340000 | -1.2605840000 |
| C7 | -0.4379430000 | -4.5898970000 | -2.3845050000 |

---

|     |               |               |               |
|-----|---------------|---------------|---------------|
| B8  | -2.7028770000 | -1.6087640000 | -1.2360800000 |
| H9  | -0.9033940000 | -2.4155300000 | 0.7918780000  |
| H10 | 0.7188260000  | -4.2842080000 | 0.7967080000  |
| H11 | 1.0637110000  | -5.6391040000 | -1.2664070000 |
| H12 | -0.3230900000 | -5.1963700000 | -3.2805860000 |
| F13 | -2.2182750000 | -0.3242300000 | -0.9949050000 |
| F14 | -3.7818690000 | -1.8795930000 | -0.3909970000 |
| H15 | -2.0293170000 | -3.9582380000 | -4.2875700000 |
| N16 | -2.1763230000 | -3.3376060000 | -3.4959380000 |
| C17 | -3.0701760000 | -2.3676250000 | -3.6141330000 |
| O18 | -3.3094000000 | -1.5554530000 | -2.6637330000 |
| C19 | -3.8452950000 | -2.1626170000 | -4.9038920000 |
| C20 | -5.3467780000 | -2.1691070000 | -4.5511610000 |
| H21 | -5.9272970000 | -1.9860420000 | -5.4621680000 |
| H22 | -5.6515340000 | -3.1366570000 | -4.1357200000 |
| H23 | -5.5854430000 | -1.3864520000 | -3.8248740000 |
| C24 | -3.4407100000 | -0.7789190000 | -5.4565590000 |
| H25 | -4.0074230000 | -0.5810230000 | -6.3732100000 |
| H26 | -3.6605670000 | 0.0133200000  | -4.7344200000 |
| H27 | -2.3717250000 | -0.7475800000 | -5.6974260000 |
| C28 | -3.5484210000 | -3.2494200000 | -5.9449730000 |
| H29 | -4.1491150000 | -3.0533810000 | -6.8395120000 |
| H30 | -2.4952540000 | -3.2481290000 | -6.2536490000 |
| H31 | -3.8172250000 | -4.2483020000 | -5.5787720000 |
| N32 | 4.4817010000  | -0.9434520000 | -0.4832660000 |
| C33 | 5.4843510000  | -1.6211600000 | 0.4030570000  |
| H34 | 6.4069460000  | -1.0312640000 | 0.3698650000  |
| H35 | 5.0971680000  | -1.6546710000 | 1.4243650000  |
| H36 | 5.6708710000  | -2.6310240000 | 0.0296720000  |
| C37 | 4.9949470000  | -0.8868290000 | -1.8911010000 |
| H38 | 5.9246430000  | -0.3075200000 | -1.8806550000 |
| H39 | 5.1898450000  | -1.9022570000 | -2.2443920000 |
| H40 | 4.2533030000  | -0.3950470000 | -2.5250380000 |
| C41 | 4.2040590000  | 0.4416950000  | 0.0208190000  |

---

|     |              |              |               |
|-----|--------------|--------------|---------------|
| H42 | 5.1486010000 | 0.9963070000 | -0.0016450000 |
| H43 | 3.4709890000 | 0.9228790000 | -0.6310150000 |
| H44 | 3.8279020000 | 0.3833900000 | 1.0449460000  |

### Backward QRC from Ipso TS

File:jag\_4a\_I\_NMe3\_ipso\_ts\_wB97X-D\_LACVPs\_2/jag\_4a\_I\_NMe3\_ipso\_ts\_wB97X-D\_LACVPs\_2\_bQRC.out; structure: final

Method: DFT(wb97x-d)/lacvp\*; Solvent: water

Total Quantum Mechanical Energy: -967.830463668 au

Solution phase energy: -967.71434010982 au

|     |               |               |               |
|-----|---------------|---------------|---------------|
| I1  | 1.1337528386  | -0.8672721831 | -0.0321604824 |
| C2  | -1.5107885973 | -3.9569003161 | -2.4413450884 |
| C3  | -2.1022532784 | -2.9662505363 | -1.6602791712 |
| C4  | -1.6236289443 | -2.8228832463 | -0.3504269617 |
| C5  | -0.5847076330 | -3.6194343494 | 0.1380686376  |
| C6  | 0.0117957006  | -4.5748811823 | -0.6959199548 |
| C7  | -0.4542284445 | -4.7537181868 | -1.9893092024 |
| B8  | -3.2726195449 | -2.0706086510 | -2.2841636476 |
| H9  | -2.0995732514 | -2.0994064897 | 0.3090146730  |
| H10 | -0.2669559922 | -3.5305249891 | 1.1748594196  |
| H11 | 0.8209522949  | -5.1961106813 | -0.3227556785 |
| H12 | -0.0246084075 | -5.5179023182 | -2.6338456877 |
| F13 | -2.8329996194 | -0.8458383380 | -2.7933664037 |
| F14 | -4.3610437305 | -1.8807629906 | -1.4377171021 |
| H15 | -1.5709010434 | -4.9131662486 | -4.3003800261 |
| N16 | -2.0510447340 | -4.2245450606 | -3.7267977308 |
| C17 | -3.2047742655 | -3.7370019351 | -4.1608897973 |
| O18 | -3.8369398850 | -2.8414200889 | -3.5117519190 |
| C19 | -3.8486044049 | -4.2448175113 | -5.4404141594 |
| C20 | -5.2415671483 | -4.7916647681 | -5.0582249848 |
| H21 | -5.7490178434 | -5.1380263034 | -5.9656175514 |
| H22 | -5.1567547145 | -5.6380764683 | -4.3664781320 |
| H23 | -5.8564403406 | -4.0174936070 | -4.5895360458 |
| C24 | -3.9987375438 | -3.0428980969 | -6.3947964911 |
| H25 | -4.5059563283 | -3.3718491545 | -7.3085659773 |

|     |               |               |               |
|-----|---------------|---------------|---------------|
| H26 | -4.5918839181 | -2.2464962848 | -5.9349790820 |
| H27 | -3.0190914710 | -2.6360023442 | -6.6709506793 |
| C28 | -3.0251917984 | -5.3525667339 | -6.1110703124 |
| H29 | -3.5453378814 | -5.6776335764 | -7.0184172513 |
| H30 | -2.0302038083 | -5.0008705106 | -6.4123084723 |
| H31 | -2.9170388872 | -6.2308434566 | -5.4622230902 |
| N32 | 2.5273154820  | 0.7831691375  | 0.2599304963  |
| C33 | 2.1961173128  | 1.8847979746  | -0.7055022948 |
| H34 | 2.9112266542  | 2.6976351914  | -0.5361986167 |
| H35 | 2.2903335930  | 1.5100876306  | -1.7277861633 |
| H36 | 1.1783367059  | 2.2365336424  | -0.5183562096 |
| C37 | 2.3986748920  | 1.2812366127  | 1.6713049247  |
| H38 | 3.1171314916  | 2.0985805312  | 1.7994917919  |
| H39 | 1.3822580071  | 1.6492216849  | 1.8336093516  |
| H40 | 2.6285683329  | 0.4685452824  | 2.3645161472  |
| C41 | 3.9218042542  | 0.2811279969  | 0.0148440097  |
| H42 | 4.6094384884  | 1.1204350061  | 0.1679134178  |
| H43 | 4.1466260954  | -0.5205181715 | 0.7230213901  |
| H44 | 3.9980687928  | -0.0828986504 | -1.0126087879 |

### Ips0 TS

File:jag\_4a\_I\_NMe3\_ipso\_ts\_wB97X-D\_LACVPs\_2/jag\_4a\_I\_NMe3\_ipso\_ts\_wB97X-D\_LACVPs\_2.out; structure: final

Method: DFT(wb97x-d)/lacvp\*; Solvent: water

Total Quantum Mechanical Energy: -967.777194174 au

Solution phase energy: -967.69170367785 au

Gibbs free energy: -967.369279 au

Low frequencies -58.13 86.70 92.74 95.58 99.32 106.19

|    |               |               |               |
|----|---------------|---------------|---------------|
| I1 | 0.3234206804  | -1.4251059816 | -1.1419906205 |
| C2 | -1.0116165369 | -4.2309949889 | -1.7275416952 |
| C3 | -0.7672394967 | -3.2999129934 | -0.6818253330 |
| C4 | -0.5587704960 | -3.8330698077 | 0.6167264431  |
| C5 | -0.6485562157 | -5.1947146973 | 0.8556758370  |
| C6 | -0.8932403970 | -6.0706251357 | -0.2055007625 |
| C7 | -1.0912193464 | -5.5930346656 | -1.5038165373 |

---

|     |               |               |               |
|-----|---------------|---------------|---------------|
| B8  | -2.6148875424 | -2.7061760770 | -0.6270697775 |
| H9  | -0.3528676082 | -3.1508680756 | 1.4381335145  |
| H10 | -0.5193936702 | -5.5797018679 | 1.8626941005  |
| H11 | -0.9619033550 | -7.1386262333 | -0.0179720699 |
| H12 | -1.3415696934 | -6.2688395719 | -2.3171739179 |
| F13 | -2.6634672011 | -1.6568522838 | 0.2129219411  |
| F14 | -3.3850120681 | -3.7655547880 | -0.2974398419 |
| H15 | -0.9888552650 | -4.1311252002 | -3.8425107480 |
| N16 | -1.3833460038 | -3.7089978777 | -3.0008935673 |
| C17 | -2.3048362924 | -2.7654732205 | -3.0898722072 |
| O18 | -2.8280326137 | -2.2716201447 | -2.0256683471 |
| C19 | -2.7612212462 | -2.1767844768 | -4.4021744954 |
| C20 | -4.2992920580 | -2.0701036124 | -4.3688921381 |
| H21 | -4.6378845306 | -1.6328113140 | -5.3139877077 |
| H22 | -4.7635624683 | -3.0563819257 | -4.2576416212 |
| H23 | -4.6375579818 | -1.4283657094 | -3.5502928776 |
| C24 | -2.1387485601 | -0.7618465740 | -4.4853847247 |
| H25 | -2.4899658012 | -0.2841722768 | -5.4064966307 |
| H26 | -2.4420339163 | -0.1428154799 | -3.6349567015 |
| H27 | -1.0446616652 | -0.8110260946 | -4.5174935849 |
| C28 | -2.3084310300 | -3.0277383896 | -5.5938635759 |
| H29 | -2.6966823327 | -2.5751580062 | -6.5118465765 |
| H30 | -1.2156188008 | -3.0627047223 | -5.6862433364 |
| H31 | -2.7009854527 | -4.0495688380 | -5.5295894541 |
| N32 | 1.6969723212  | 0.7930918066  | -1.7083875137 |
| C33 | 2.7944378689  | 0.4365601202  | -2.6097872028 |
| H34 | 3.3904168148  | 1.3218847553  | -2.8867028737 |
| H35 | 3.4493456877  | -0.2905345011 | -2.1202818643 |
| H36 | 2.3892786559  | -0.0132336446 | -3.5217434492 |
| C37 | 0.7828848519  | 1.7386485277  | -2.3529138238 |
| H38 | 1.2945187094  | 2.6836261867  | -2.5998843573 |
| H39 | 0.3923564728  | 1.3023907836  | -3.2781342463 |
| H40 | -0.0560699359 | 1.9568001410  | -1.6835772729 |
| C41 | 2.2124529662  | 1.3460865077  | -0.4533771933 |

---

|     |              |              |               |
|-----|--------------|--------------|---------------|
| H42 | 2.7924250636 | 2.2670012207 | -0.6305026030 |
| H43 | 1.3772472954 | 1.5794032940 | 0.2155298714  |
| H44 | 2.8603184233 | 0.6106904163 | 0.0347616669  |

### Forward QRC from ipso TS

File:jag\_4a\_I\_NMe3\_ipso\_ts\_wB97X-D\_LACVPs\_2/jag\_4a\_I\_NMe3\_ipso\_ts\_wB97X-D\_LACVPs\_2\_fQRC.out; structure: final

Method: DFT(wb97x-d)/lacvp\*; Solvent: water

Total Quantum Mechanical Energy: -967.789836689 au

Solution phase energy: -967.70339201333 au

|     |               |               |               |
|-----|---------------|---------------|---------------|
| I1  | 0.1262890199  | -1.3223825077 | -0.6954446975 |
| C2  | -1.2909010480 | -4.0837020743 | -1.0583320001 |
| C3  | -0.9558647591 | -3.0736524093 | -0.1484100627 |
| C4  | -1.3963648383 | -3.2047590462 | 1.1699828288  |
| C5  | -2.1391318258 | -4.3153488098 | 1.5633802365  |
| C6  | -2.4553198048 | -5.3171003957 | 0.6476142664  |
| C7  | -2.0279993469 | -5.2022573138 | -0.6698779298 |
| B8  | -3.5437408371 | -2.5640454957 | -2.2643841348 |
| H9  | -1.1625760015 | -2.4313427250 | 1.8965082893  |
| H10 | -2.4754990867 | -4.3912703984 | 2.5938487442  |
| H11 | -3.0406355044 | -6.1789534648 | 0.9526675711  |
| H12 | -2.2729997010 | -5.9621584171 | -1.4074381914 |
| F13 | -4.0704845629 | -1.5648549237 | -1.6055651793 |
| F14 | -4.1577788108 | -3.7176596992 | -2.3990201114 |
| H15 | -0.1646869670 | -4.6741406319 | -2.7570326385 |
| N16 | -0.8865081860 | -4.0164863701 | -2.4452323139 |
| C17 | -1.4260065139 | -3.2055312350 | -3.3077031243 |
| O18 | -2.3288777350 | -2.3466110586 | -2.8811948947 |
| C19 | -1.0518089276 | -3.0976098869 | -4.7572462390 |
| C20 | -2.3640067986 | -3.2133821130 | -5.5694498050 |
| H21 | -2.1126658512 | -3.1669969566 | -6.6341644061 |
| H22 | -2.8732153896 | -4.1648170658 | -5.3763217641 |
| H23 | -3.0494792391 | -2.3880406855 | -5.3489827033 |
| C24 | -0.4287888600 | -1.6945647544 | -4.9619829257 |
| H25 | -0.2028531209 | -1.5750943204 | -6.0268979724 |

---

|     |               |               |               |
|-----|---------------|---------------|---------------|
| H26 | -1.1204473581 | -0.9004493229 | -4.6634753477 |
| H27 | 0.5031869238  | -1.5890067662 | -4.3960695695 |
| C28 | -0.0621851717 | -4.1935619347 | -5.1634293779 |
| H29 | 0.1645183201  | -4.0817834729 | -6.2285621533 |
| H30 | 0.8843188809  | -4.1128549833 | -4.6146018085 |
| H31 | -0.4866944665 | -5.1936829921 | -5.0128724317 |
| N32 | 1.3744037986  | 1.2556850955  | -1.4035919549 |
| C33 | 2.6349033230  | 1.3852590305  | -0.6815776540 |
| H34 | 3.1198984824  | 2.3625839354  | -0.8624541282 |
| H35 | 2.4566042307  | 1.2815188061  | 0.3941469386  |
| H36 | 3.3234280126  | 0.5939568478  | -0.9971499393 |
| C37 | 1.5844912572  | 1.3327357768  | -2.8444202995 |
| H38 | 2.0254812659  | 2.2997969302  | -3.1499435079 |
| H39 | 2.2572995371  | 0.5299856809  | -3.1654160622 |
| H40 | 0.6271620072  | 1.2133509903  | -3.3639457695 |
| C41 | 0.4262497906  | 2.2741996875  | -0.9639572184 |
| H42 | 0.7927146905  | 3.2978207309  | -1.1658691816 |
| H43 | -0.5291032241 | 2.1392387166  | -1.4827418147 |
| H44 | 0.2516748420  | 2.1775366078  | 0.1132530824  |

**Addition product with carrier model (NMe<sub>3</sub>) still attached**

File:jag\_4a\_I\_NMe3\_ipsoprod\_opt\_wB97X-D\_LACVPs\_2/jag\_4a\_I\_NMe3\_ipsoprod\_opt\_wB97X-D\_LACVPs\_2.out; structure: final

Method: DFT(wb97x-d)/lacvp\*; Solvent: water

Total Quantum Mechanical Energy: -967.787831068 au

Solution phase energy: -967.70516735607 au

Gibbs free energy: -967.383991 au

Low frequencies 38.42 66.63 87.37 88.32 94.88 98.08

|    |               |               |               |
|----|---------------|---------------|---------------|
| I1 | -2.1326026271 | -1.3469734164 | -0.4783084919 |
| C2 | -1.0362011672 | -4.0071797712 | -1.6976043873 |
| C3 | -1.1917296645 | -3.2574278316 | -0.5268191165 |
| C4 | -0.7177906888 | -3.8011119708 | 0.6687653562  |
| C5 | -0.1024299668 | -5.0508277459 | 0.6868852385  |
| C6 | 0.0534231977  | -5.7794429954 | -0.4900052199 |
| C7 | -0.4169915101 | -5.2573622864 | -1.6889251232 |



---

|     |               |               |               |
|-----|---------------|---------------|---------------|
| B8  | -3.8335729330 | -5.0862481858 | -1.6765719617 |
| H9  | -0.8316891310 | -3.2470317042 | 1.5965565091  |
| H10 | 0.2546410251  | -5.4544281135 | 1.6304231718  |
| H11 | 0.5294026980  | -6.7551987008 | -0.4767060423 |
| H12 | -0.3240937974 | -5.8164889038 | -2.6164274497 |
| F13 | -4.5237667208 | -5.0947913795 | -0.5652339245 |
| F14 | -3.3467701836 | -6.1846593297 | -2.2113756798 |
| H15 | -0.8641403862 | -3.2380350374 | -3.6727404547 |
| N16 | -1.5454038849 | -3.5417724208 | -2.9699084750 |
| C17 | -2.8134335599 | -3.5357002395 | -3.2602240942 |
| O18 | -3.6686919956 | -3.8744715183 | -2.3154503785 |
| C19 | -3.4110640778 | -3.1105364564 | -4.5697248940 |
| C20 | -4.3309140169 | -4.2647542692 | -5.0370198442 |
| H21 | -4.7534971748 | -3.9923902895 | -6.0099134004 |
| H22 | -3.7750247600 | -5.2025854426 | -5.1547266740 |
| H23 | -5.1637791761 | -4.4247870391 | -4.3434705478 |
| C24 | -4.2624695438 | -1.8473608313 | -4.2946917130 |
| H25 | -4.7593524934 | -1.5628831089 | -5.2283621502 |
| H26 | -5.0306144504 | -2.0374794025 | -3.5385952812 |
| H27 | -3.6359214962 | -1.0115100893 | -3.9666436618 |
| C28 | -2.3285185036 | -2.8197777224 | -5.6136676487 |
| H29 | -2.8157768720 | -2.5327715415 | -6.5510416384 |
| H30 | -1.6819578167 | -1.9872319623 | -5.3099646109 |
| H31 | -1.7119791409 | -3.7049044370 | -5.8133057797 |
| N32 | -3.5135068788 | 1.1949901103  | -0.2962275679 |
| C33 | -4.8296935573 | 0.9322729541  | 0.2771916704  |
| H34 | -5.4272737103 | 1.8555999623  | 0.3879571244  |
| H35 | -5.3807545226 | 0.2373358973  | -0.3662887395 |
| H36 | -4.7171821208 | 0.4722770742  | 1.2647605844  |
| C37 | -2.7315386839 | 2.0707732168  | 0.5710401303  |
| H38 | -3.2041987808 | 3.0625005811  | 0.6979773093  |
| H39 | -2.6230655147 | 1.6098547002  | 1.5595264825  |
| H40 | -1.7329177324 | 2.2156320262  | 0.1441004925  |
| C41 | -3.6316566928 | 1.7585629347  | -1.6362094574 |

---

|     |               |              |               |
|-----|---------------|--------------|---------------|
| H42 | -4.1732273798 | 2.7221690272 | -1.6391089665 |
| H43 | -2.6340157943 | 1.9210022146 | -2.0589012805 |
| H44 | -4.1703066479 | 1.0581842140 | -2.2840375783 |

**Carrier model, NMe<sub>3</sub>**

File: jag\_Me3N\_opt\_wB97X-D\_LACVPs/jag\_Me3N\_opt\_wB97X-D\_LACVPs.out; structure: final

Method: DFT(wb97x-d)/lacvp\*; Solvent: water

Total Quantum Mechanical Energy: -174.427376604 au

Solution phase energy: -174.42152553246 au

Gibbs free energy: -174.325895 au

Low frequencies 285.38 311.84 311.95 405.31 459.36 459.53

|     |              |               |               |
|-----|--------------|---------------|---------------|
| N32 | 3.9888759706 | -1.3795094237 | 0.0357222146  |
| C33 | 4.3577015380 | -1.2522507690 | -1.3679373686 |
| H34 | 5.3418008468 | -0.7619685192 | -1.5070838302 |
| H35 | 4.4045237851 | -2.2428961783 | -1.8346071504 |
| H36 | 3.6059351739 | -0.6587693742 | -1.9007975269 |
| C37 | 3.8828929321 | -0.0664505707 | 0.6580120112  |
| H38 | 4.8401418073 | 0.4917420098  | 0.6410378724  |
| H39 | 3.1309836062 | 0.5363444632  | 0.1358764047  |
| H40 | 3.5707049282 | -0.1708533198 | 1.7034812828  |
| C41 | 4.9555621142 | -2.2062036265 | 0.7458898489  |
| H42 | 5.9766568838 | -1.7755171301 | 0.7319438815  |
| H43 | 4.6521885201 | -2.3224373346 | 1.7927099296  |
| H44 | 5.0024109103 | -3.2023756492 | 0.2911975427  |

**Addition product with carrier model (NMe<sub>3</sub>) dissociated**

File: jag\_4a\_I\_ipsoprod\_opt\_wB97X-D\_LACVPs/jag\_4a\_I\_ipsoprod\_opt\_wB97X-D\_LACVPs.out;  
structure: final

Method: DFT(wb97x-d)/lacvp\*; Solvent: water

Total Quantum Mechanical Energy: -793.360381789 au

Solution phase energy: -793.27462612311 au

Gibbs free energy: -793.071175 au

Low frequencies 44.33 74.64 91.10 92.25 105.80 120.35

|    |               |               |               |
|----|---------------|---------------|---------------|
| I1 | -1.6844790432 | -1.1789344053 | -0.7724360300 |
| C2 | -1.1415614346 | -4.0827096026 | -1.6682916934 |
| C3 | -1.0881571022 | -3.1978044197 | -0.5864466263 |

---

|     |               |               |               |
|-----|---------------|---------------|---------------|
| C4  | -0.6276826119 | -3.6543904512 | 0.6453445102  |
| C5  | -0.2159490406 | -4.9783718127 | 0.7851800656  |
| C6  | -0.2504248615 | -5.8487855893 | -0.3005628302 |
| C7  | -0.7168175614 | -5.4021411630 | -1.5339799566 |
| B8  | -4.0401408016 | -5.0520806464 | -1.5303949458 |
| H9  | -0.5918244537 | -2.9838657625 | 1.4980222878  |
| H10 | 0.1334016018  | -5.3237789751 | 1.7543337210  |
| H11 | 0.0725711193  | -6.8789931101 | -0.1883357347 |
| H12 | -0.7692503103 | -6.0696371092 | -2.3904028201 |
| F13 | -4.6894223873 | -5.0415635463 | -0.3962225096 |
| F14 | -3.6793115151 | -6.1666434752 | -2.1263961919 |
| H15 | -1.0294392343 | -3.4490273368 | -3.6990348711 |
| N16 | -1.6847228857 | -3.6701048586 | -2.9415959252 |
| C17 | -2.9681066650 | -3.5787526594 | -3.1408204310 |
| O18 | -3.7645624369 | -3.8340761986 | -2.1168914733 |
| C19 | -3.6354737891 | -3.1401328631 | -4.4096957530 |
| C20 | -4.5347932551 | -4.3174140476 | -4.8641690390 |
| H21 | -5.0087085288 | -4.0356278174 | -5.8100415793 |
| H22 | -3.9502990170 | -5.2296492830 | -5.0283701077 |
| H23 | -5.3320459857 | -4.5238298714 | -4.1411734332 |
| C24 | -4.5191640508 | -1.9126211021 | -4.0716538377 |
| H25 | -5.0583393727 | -1.6260504340 | -4.9814135347 |
| H26 | -5.2541274200 | -2.1471063143 | -3.2948468889 |
| H27 | -3.9149193081 | -1.0586363925 | -3.7453233508 |
| C28 | -2.6088474150 | -2.7890128445 | -5.4898016655 |
| H29 | -3.1451120141 | -2.4732373125 | -6.3902306655 |
| H30 | -1.9652538462 | -1.9572617230 | -5.1780105978 |
| H31 | -1.9877359242 | -3.6527289508 | -5.7564064373 |

**Addition product with water added to B**

File:jag\_4a\_I\_ipsoprod\_H2O\_opt\_wB97X-D\_LACVPs/jag\_4a\_I\_ipsoprod\_H2O\_opt\_wB97X-D\_LACVPs.out; structure: final

Method: DFT(wb97x-d)/lacvp\*; Solvent: water

Total Quantum Mechanical Energy: -869.818555404 au

Solution phase energy: -869.72765128785 au

---

Gibbs free energy: -869.496955 au

Low frequencies 67.24 81.97 88.47 110.23 122.72 130.74

|     |               |               |               |
|-----|---------------|---------------|---------------|
| I1  | -2.0948944161 | -1.0281433612 | -0.5943410190 |
| C2  | -1.1065512001 | -3.0078466345 | -2.7336419276 |
| C3  | -0.7324164995 | -2.3100842400 | -1.5842841924 |
| C4  | 0.5642204105  | -2.4306633956 | -1.0935458361 |
| C5  | 1.4830704462  | -3.2366243848 | -1.7623847597 |
| C6  | 1.1126279449  | -3.9241098785 | -2.9153409638 |
| C7  | -0.1857332537 | -3.8106054279 | -3.4013108230 |
| B8  | -4.3064246561 | -5.0254703056 | -1.0326801989 |
| H9  | 0.8643442860  | -1.8905909457 | -0.2016185498 |
| H10 | 2.4959247086  | -3.3160843689 | -1.3778119404 |
| H11 | 1.8330581939  | -4.5435766735 | -3.4407225417 |
| H12 | -0.4957390787 | -4.3295253021 | -4.3049944520 |
| F13 | -4.8668648974 | -4.1655450421 | -0.1433286652 |
| F14 | -5.1563222468 | -5.8547679251 | -1.7006618603 |
| H15 | -2.4516107022 | -2.1921505547 | -4.0952632625 |
| N16 | -2.4048763690 | -2.8412385572 | -3.3119473956 |
| C17 | -3.5080284613 | -3.4527145731 | -2.9226319845 |
| O18 | -3.3754520379 | -4.2966315370 | -1.9568474914 |
| C19 | -4.7982457175 | -3.1432281675 | -3.6872434080 |
| C20 | -5.1064093612 | -4.3694673825 | -4.5766314101 |
| H21 | -6.0218417463 | -4.1613601995 | -5.1418378131 |
| H22 | -4.2960100069 | -4.5459423746 | -5.2935264939 |
| H23 | -5.2611653193 | -5.2720182096 | -3.9824944545 |
| C24 | -5.9637043036 | -2.8587912067 | -2.7191131457 |
| H25 | -6.8182439740 | -2.5195583721 | -3.3148469561 |
| H26 | -6.2772332698 | -3.7475528044 | -2.1713901909 |
| H27 | -5.7126916113 | -2.0660431100 | -2.0058097760 |
| C28 | -4.6253940791 | -1.9095980935 | -4.5983156805 |
| H29 | -5.5842227243 | -1.7100185269 | -5.0871234794 |
| H30 | -4.3511987353 | -1.0130286949 | -4.0296938593 |
| H31 | -3.8957506940 | -2.0691270467 | -5.4027327118 |
| H32 | -3.6414549385 | -6.9428430616 | -0.1841772539 |

---

|     |               |               |               |
|-----|---------------|---------------|---------------|
| O33 | -3.3657121583 | -5.9974165788 | -0.1811430227 |
| H34 | -3.2436130111 | -5.7532970265 | 0.7644470569  |

**Product w. boron moiety dissociated (neutral)**

File: jag\_3a\_opt\_wB97X-D\_LACVPs/jag\_3a\_opt\_wB97X-D\_LACVPs.out; structure: final

Method: DFT(wb97x-d)/lacvp\*; Solvent: water

Total Quantum Mechanical Energy: -568.845166744 au

Solution phase energy: -568.81903440318 au

Gibbs free energy: -568.624770 au

Low frequencies 80.70 103.05 107.05 123.90 168.56 197.37

|     |               |               |               |
|-----|---------------|---------------|---------------|
| C1  | -0.6738494270 | 0.9377346404  | -0.0331366688 |
| C2  | -0.0104934712 | 1.2022067666  | 1.1690452442  |
| C3  | 1.3794167733  | 1.2495134527  | 1.2236127536  |
| C4  | 2.1185637864  | 1.0316867860  | 0.0630549217  |
| C5  | 1.4712225224  | 0.7678777521  | -1.1415082087 |
| C6  | 0.0812052145  | 0.7202645022  | -1.1853954499 |
| H8  | 1.8869646957  | 1.4557161966  | 2.1601884205  |
| H9  | 3.2030328002  | 1.0712308882  | 0.1086778886  |
| H10 | 2.0472460660  | 0.6005553976  | -2.0464017707 |
| H11 | -0.4423218775 | 0.5171722286  | -2.1156722356 |
| H14 | -2.5673784405 | 1.7810037803  | -0.2970585938 |
| N15 | -2.0934794626 | 0.9066023230  | -0.1047682903 |
| C16 | -2.7999313139 | -0.2369677547 | 0.1122887164  |
| O17 | -2.2351486952 | -1.3093140346 | 0.3306628013  |
| C18 | -4.3342376473 | -0.1352118431 | 0.0798552144  |
| C19 | -4.8240430254 | -1.0434068097 | -1.0627179767 |
| H20 | -5.9199255348 | -1.0548495535 | -1.0836897534 |
| H21 | -4.4676635818 | -0.6812131149 | -2.0342969222 |
| H22 | -4.4678966088 | -2.0687315339 | -0.9237222937 |
| C23 | -4.8517129726 | -0.6709744443 | 1.4278540874  |
| H24 | -5.9481271414 | -0.6860264839 | 1.4241585546  |
| H25 | -4.4892384048 | -1.6878200950 | 1.6051698335  |
| H26 | -4.5220439304 | -0.0367246660 | 2.2596279010  |
| C27 | -4.8575190788 | 1.2914108784  | -0.1360160144 |
| H28 | -5.9531779029 | 1.2782648357  | -0.1306317760 |

---

|     |               |              |               |
|-----|---------------|--------------|---------------|
| H29 | -4.5345115610 | 1.9692658358 | 0.6635784691  |
| H30 | -4.5436037230 | 1.7055289162 | -1.1022875918 |
| I32 | -1.1188377231 | 1.5460732340 | 2.9453630594  |

**Dissociated boron w. water, cationic**

File: jag\_F2B\_OH2\_opt\_wB97X-D\_LACVPs/jag\_F2B\_OH2\_opt\_wB97X-D\_LACVPs.out; structure: final

Method: DFT(wb97x-d)/lacvp\*; Solvent: water

Total Quantum Mechanical Energy: -300.991158351 au

Solution phase energy: -300.85320340927 au

Gibbs free energy: -300.842564 au

Low frequencies 405.80 477.19 592.79 616.64 633.54 846.27

|     |               |               |               |
|-----|---------------|---------------|---------------|
| B8  | -3.4599393577 | -5.0278486817 | -1.0128985599 |
| F13 | -4.4555423324 | -4.5274448994 | -0.3445259206 |
| F14 | -3.5524927421 | -6.0214850022 | -1.8449576604 |
| H32 | -1.3625538326 | -4.7422343892 | -1.3072857005 |
| O33 | -2.1708391545 | -4.4510106289 | -0.8109982222 |
| H34 | -2.0133779977 | -3.6700346224 | -0.2195319893 |

**Dissociated boron with hydroxide, neutral**

File: jag\_F2B\_OH\_opt\_wB97X-D\_LACVPs/jag\_F2B\_OH\_opt\_wB97X-D\_LACVPs.out; structure: final

Method: DFT(wb97x-d)/lacvp\*; Solvent: water

Total Quantum Mechanical Energy: -300.465627492 au

Solution phase energy: -300.44831736065 au

Gibbs free energy: -300.449151 au

Low frequencies 474.64 478.47 676.94 747.68 883.56 1147.92

|     |               |               |               |
|-----|---------------|---------------|---------------|
| B8  | -3.3897200218 | -5.0058478822 | -1.0088016737 |
| F13 | -4.4610987784 | -4.5585644967 | -0.3585197381 |
| F14 | -3.5609059346 | -6.0259509904 | -1.8481742109 |
| H32 | -1.4696994409 | -4.8025970035 | -1.3133467676 |
| O33 | -2.1958266973 | -4.4200833105 | -0.7929947138 |

**Protonated carrier model (NMe<sub>3</sub>), cationic**

File: jag\_Me3NH\_cat\_opt\_wB97X-D\_LACVPs/jag\_Me3NH\_cat\_opt\_wB97X-D\_LACVPs.out; structure: final

Method: DFT(wb97x-d)/lacvp\*; Solvent: water

---

Total Quantum Mechanical Energy: -175.004035492 au

Solution phase energy: -174.89609487154 au

Gibbs free energy: -174.785547 au

Low frequencies 202.57 283.61 286.68 428.47 429.27 483.18

|     |              |               |               |
|-----|--------------|---------------|---------------|
| N32 | 3.9889827585 | -1.3794822470 | 0.0355733107  |
| C33 | 4.3579829168 | -1.2537327422 | -1.4082007753 |
| H34 | 5.3346819361 | -0.7640239619 | -1.4703383756 |
| H35 | 4.4063941102 | -2.2528129698 | -1.8456481419 |
| H36 | 3.5994922105 | -0.6516268878 | -1.9122807580 |
| C37 | 3.8696699454 | -0.0336551367 | 0.6765032719  |
| H38 | 4.8458727012 | 0.4580020504  | 0.6225940779  |
| H39 | 3.1219327245 | 0.5479621752  | 0.1337683265  |
| H40 | 3.5692428997 | -0.1667215326 | 1.7176318028  |
| C41 | 4.9728760995 | -2.2353033643 | 0.7675477095  |
| H42 | 5.9528529750 | -1.7511203329 | 0.7148448139  |
| H43 | 4.6516024498 | -2.3278244310 | 1.8068789480  |
| H44 | 5.0080857913 | -3.2160632024 | 0.2892283067  |
| H14 | 3.0679792531 | -1.8390852496 | 0.0882852431  |

**Dissociated boron w. carrier model (NMe<sub>3</sub>), cationic**

File:jag\_Me3N\_F2B\_OH2\_opt\_wB97X-D\_LACVPs/jag\_Me3N\_F2B\_OH2\_opt\_wB97X-D\_LACVPs.out; structure: final

Method: DFT(wb97x-d)/lacvp\*; Solvent: water

Total Quantum Mechanical Energy: -475.457214494 au

Solution phase energy: -475.35384964252 au

Gibbs free energy: -475.221816 au

Low frequencies 104.86 222.09 228.93 233.59 295.07 305.67

|     |              |               |               |
|-----|--------------|---------------|---------------|
| B8  | 2.6341640000 | -2.2560580000 | 0.2739540000  |
| F13 | 1.5473120000 | -1.5047660000 | -0.0568910000 |
| F14 | 2.8043990000 | -3.4150760000 | -0.4209770000 |
| H32 | 2.4789430000 | -3.6433960000 | 1.9813100000  |
| O33 | 2.4331960000 | -2.6765740000 | 1.7974590000  |
| H34 | 1.6025610000 | -2.3545320000 | 2.2184360000  |
| N32 | 3.9617120000 | -1.3566030000 | 0.1343980000  |
| C33 | 4.1232730000 | -0.9887810000 | -1.3174090000 |



---

|     |              |               |               |
|-----|--------------|---------------|---------------|
| H9  | 5.0206160000 | -0.3704290000 | -1.4228530000 |
| H35 | 4.2316140000 | -1.8984670000 | -1.9112060000 |
| H36 | 3.2479900000 | -0.4253910000 | -1.6468810000 |
| C37 | 3.8556620000 | -0.0898150000 | 0.9244830000  |
| H38 | 4.7652270000 | 0.4983530000  | 0.7677090000  |
| H39 | 2.9896970000 | 0.4767780000  | 0.5770560000  |
| H40 | 3.7526860000 | -0.3314600000 | 1.9843770000  |
| C41 | 5.1838460000 | -2.1071570000 | 0.5619430000  |
| H42 | 6.0595960000 | -1.4696700000 | 0.4055460000  |
| H43 | 5.0998860000 | -2.3618280000 | 1.6204560000  |
| H44 | 5.2777030000 | -3.0116930000 | -0.0420240000 |

**Addition product with carrier model (NMe<sub>3</sub>) added to B**

File: jag\_4a\_I\_ipsoprod\_NMe3\_opt\_wB97X-D\_LACVPs/jag\_4a\_I\_ipsoprod\_NMe3\_opt\_wB97X-D\_LACVPs.out; structure: final

Method: DFT(wb97x-d)/lacvp\*; Solvent: water

Total Quantum Mechanical Energy: -967.854252245 au

Solution phase energy: -967.77268601493 au

Gibbs free energy: -967.444869 au

Low frequencies 73.65 79.67 90.52 110.65 114.52 118.25

|     |               |               |               |
|-----|---------------|---------------|---------------|
| I1  | -2.1231501766 | -0.9514693178 | -0.6665119408 |
| C2  | -1.1411490180 | -3.0575244948 | -2.6844633283 |
| C3  | -0.7977309577 | -2.3586243310 | -1.5251669782 |
| C4  | 0.4272891707  | -2.5980612477 | -0.9084368271 |
| C5  | 1.3036086349  | -3.5340081651 | -1.4541859502 |
| C6  | 0.9630921650  | -4.2288468415 | -2.6118805928 |
| C7  | -0.2618893318 | -3.9902367349 | -3.2279218661 |
| H9  | 0.6999296391  | -2.0628035020 | -0.0046459726 |
| H10 | 2.2567443174  | -3.7150871422 | -0.9650635925 |
| H11 | 1.6476231004  | -4.9571004696 | -3.0360525443 |
| H12 | -0.5498452352 | -4.5229158927 | -4.1309591337 |
| H15 | -2.4074018236 | -2.1965754885 | -4.1265540441 |
| N16 | -2.3979963320 | -2.8379261662 | -3.3353813177 |
| C17 | -3.5113838100 | -3.4398375174 | -2.9520055764 |
| O18 | -3.3759703305 | -4.2620937105 | -1.9787002858 |

---

|     |               |               |               |
|-----|---------------|---------------|---------------|
| C19 | -4.8153259096 | -3.1654024119 | -3.6878456422 |
| C20 | -5.1658262763 | -4.4384136024 | -4.4912303962 |
| H21 | -6.1059867791 | -4.2609033379 | -5.0249675693 |
| H22 | -4.3885270799 | -4.6621719593 | -5.2308498304 |
| H23 | -5.2957816551 | -5.3016217214 | -3.8365517023 |
| C24 | -5.9343898945 | -2.8331741490 | -2.6781105048 |
| H25 | -6.8166950443 | -2.5164743614 | -3.2449025658 |
| H26 | -6.2194205999 | -3.6967183267 | -2.0768280426 |
| H27 | -5.6467891380 | -2.0137042411 | -2.0099831429 |
| C28 | -4.6644829424 | -1.9829333965 | -4.6602212067 |
| H29 | -5.6305180463 | -1.8128129411 | -5.1459180120 |
| H30 | -4.3875526492 | -1.0593512222 | -4.1381112411 |
| H31 | -3.9388819316 | -2.1836098529 | -5.4584751541 |
| B8  | -4.2346991938 | -5.0203249701 | -1.0005152220 |
| F13 | -5.1531644834 | -5.8233016601 | -1.6371784817 |
| F14 | -4.7934904860 | -4.1544771244 | -0.0959969551 |
| N32 | -3.1918282600 | -5.9773741048 | -0.2190133938 |
| C33 | -3.9635802430 | -6.8047502714 | 0.7636063433  |
| H34 | -3.2668068206 | -7.4469988604 | 1.3103209787  |
| H35 | -4.4807682904 | -6.1408268805 | 1.4594226417  |
| H36 | -4.6879068946 | -7.4169451794 | 0.2237888222  |
| C37 | -2.4895189737 | -6.8883843668 | -1.1716486566 |
| H38 | -1.8209139222 | -7.5475968736 | -0.6102265614 |
| H39 | -3.2301668043 | -7.4817167728 | -1.7110660532 |
| H40 | -1.9099295608 | -6.2881944385 | -1.8747695619 |
| C41 | -2.1812962987 | -5.1720731782 | 0.5287658789  |
| H42 | -1.5190266781 | -5.8475550115 | 1.0784417142  |
| H43 | -1.6003976881 | -4.5836623340 | -0.1818171137 |
| H44 | -2.6981535248 | -4.5098218507 | 1.2251025920  |

**Dissociated boron with carrier model (NMe<sub>3</sub>), neutral**

File: jag\_Me3NBF2\_opt\_wB97X-D\_LACVPs/jag\_Me3NBF2\_opt\_wB97X-D\_LACVPs.out; structure:  
final

Method: DFT(wb97x-d)/lacvp\*; Solvent: water

Total Quantum Mechanical Energy: -398.98856669 au

---

Solution phase energy: -398.88751277646 au

Gibbs free energy: -398.782395 au

Low frequencies 58.13 205.51 229.58 257.03 295.88 319.14

|     |               |               |               |
|-----|---------------|---------------|---------------|
| B8  | -4.4192717518 | -5.2278456043 | -0.7961474177 |
| F13 | -5.1749337233 | -5.7910267955 | -1.6996655789 |
| F14 | -4.4839251432 | -3.9531401044 | -0.5271976986 |
| N32 | -3.4548778781 | -6.1099353342 | -0.0162555918 |
| C33 | -4.2983215020 | -6.9077411802 | 0.9601161594  |
| H9  | -3.6242781367 | -7.5479793923 | 1.5356407306  |
| H35 | -4.8191449628 | -6.2132263784 | 1.6265397120  |
| H36 | -5.0124338341 | -7.5162654872 | 0.3993701754  |
| C37 | -2.7442344457 | -7.0471732116 | -0.9649385187 |
| H38 | -2.0689623897 | -7.6709387111 | -0.3742929925 |
| H39 | -3.4826070730 | -7.6681263992 | -1.4757567629 |
| H40 | -2.1765419615 | -6.4522364394 | -1.6862437471 |
| C41 | -2.4445044163 | -5.2874596875 | 0.7398349715  |
| H42 | -1.7894731220 | -5.9750877543 | 1.2799718121  |
| H43 | -1.8664364435 | -4.6949690797 | 0.0264207876  |
| H44 | -2.9684177400 | -4.6357172784 | 1.4419765759  |

**Alternative starting material before Br<sub>2</sub> has been replaced by F<sub>2</sub>**

File: jag\_4Br2\_opt\_wB97X-D\_LACVPs/jag\_4Br2\_opt\_wB97X-D\_LACVPs.out; structure: final

Method: DFT(wb97x-d)/lacvp\*; Solvent: water

Total Quantum Mechanical Energy: -608.804480964 au

Solution phase energy: -608.75817058117 au

Gibbs free energy: -608.558364 au

Low frequencies 65.92 92.74 97.92 120.65 124.02 138.82

|    |               |              |              |
|----|---------------|--------------|--------------|
| C1 | 2.0879535347  | 0.4752650629 | 0.0000000000 |
| C2 | 0.8769252181  | 1.1704816315 | 0.0000000000 |
| C3 | 0.9364712231  | 2.5687558684 | 0.0000000000 |
| C4 | 2.1539705743  | 3.2366552817 | 0.0000000000 |
| C5 | 3.3486628032  | 2.5108005617 | 0.0000000000 |
| C6 | 3.3238641154  | 1.1223397756 | 0.0000000000 |
| B7 | -0.4542339388 | 0.3318110197 | 0.0000000000 |
| H8 | 0.0086367345  | 3.1365892045 | 0.0000000000 |

|      |               |               |               |
|------|---------------|---------------|---------------|
| H9   | 2.1778224778  | 4.3229434310  | 0.0000000000  |
| H10  | 4.3021199670  | 3.0309592433  | 0.0000000000  |
| H11  | 4.2465025617  | 0.5463139775  | 0.0000000000  |
| Br12 | -1.6341638095 | 0.6978978426  | -1.6970691102 |
| Br13 | -1.6341638095 | 0.6978978426  | 1.6970691102  |
| H14  | 2.9644019383  | -1.4266717078 | 0.0000000000  |
| N15  | 2.0648167983  | -0.9460491305 | 0.0000000000  |
| C16  | 0.9645087760  | -1.6692539300 | 0.0000000000  |
| O17  | -0.1962722400 | -1.1184714221 | 0.0000000000  |
| C18  | 1.0178973903  | -3.1847509210 | 0.0000000000  |
| C19  | -0.4093889531 | -3.7532539915 | 0.0000000000  |
| H20  | -0.3515033288 | -4.8466405042 | 0.0000000000  |
| H21  | -0.9677478571 | -3.4372489388 | 0.8867318677  |
| H22  | -0.9677478571 | -3.4372489388 | -0.8867318677 |
| C23  | 1.7623613548  | -3.6440850705 | -1.2708713181 |
| H24  | 1.7731307939  | -4.7389087600 | -1.2968211955 |
| H25  | 1.2548700066  | -3.2825149279 | -2.1725554738 |
| H26  | 2.8006506412  | -3.2942014944 | -1.2920311824 |
| C27  | 1.7623613548  | -3.6440850705 | 1.2708713181  |
| H28  | 1.7731307939  | -4.7389087600 | 1.2968211955  |
| H29  | 2.8006506412  | -3.2942014944 | 1.2920311824  |
| H30  | 1.2548700066  | -3.2825149279 | 2.1725554738  |

### TS for alternative Br<sub>2</sub> starting material

File: jag\_4Br2\_I\_NMe3\_ipso\_ts\_wB97X-D\_LACVPs/jag\_4Br2\_I\_NMe3\_ipso\_ts\_wB97X-D\_LACVPs.out; structure: final

Method: DFT(wb97x-d)/lacvp\*; Solvent: water

Total Quantum Mechanical Energy: -794.432869124 au

Solution phase energy: -794.34573821335 au

Gibbs free energy: -794.030792 au

Low frequencies -248.25 62.33 81.37 92.09 98.50 101.14

|    |               |               |               |
|----|---------------|---------------|---------------|
| I1 | 0.4383802561  | -1.4836252488 | -1.1471461382 |
| C2 | -0.9630259501 | -4.2543947179 | -1.6579460478 |
| C3 | -0.6425235444 | -3.3196780228 | -0.6428116283 |
| C4 | -0.4743354783 | -3.8233881671 | 0.6685367410  |

---

|      |               |               |               |
|------|---------------|---------------|---------------|
| C5   | -0.6338751214 | -5.1730087541 | 0.9406745903  |
| C6   | -0.9248885131 | -6.0641836527 | -0.0957443271 |
| C7   | -1.1048832729 | -5.6072812242 | -1.4022330416 |
| B8   | -2.7373277121 | -2.6632308028 | -0.6716360423 |
| H9   | -0.2136947206 | -3.1368123102 | 1.4701819767  |
| H10  | -0.5236318999 | -5.5368106748 | 1.9578617548  |
| H11  | -1.0463575676 | -7.1222596849 | 0.1184647841  |
| H12  | -1.4023099192 | -6.2855646250 | -2.1973375638 |
| Br13 | -2.8216585444 | -1.1148418934 | 0.5489873769  |
| Br14 | -3.9629681427 | -4.1467732270 | -0.2047780353 |
| H15  | -0.8990421018 | -4.1965354526 | -3.7787532660 |
| N16  | -1.3154987380 | -3.7573646375 | -2.9538544353 |
| C17  | -2.2269830575 | -2.8229538785 | -3.0939265375 |
| O18  | -2.7644212490 | -2.2799237221 | -2.0437769909 |
| C19  | -2.6817702675 | -2.2632938055 | -4.4154437458 |
| C20  | -4.2246770303 | -2.2033562032 | -4.3965815729 |
| H21  | -4.5657275073 | -1.7843982755 | -5.3489914718 |
| H22  | -4.6617951977 | -3.2010941490 | -4.2796212214 |
| H23  | -4.5900015759 | -1.5613855228 | -3.5895819118 |
| C24  | -2.1028376718 | -0.8298711737 | -4.5075504206 |
| H25  | -2.4615107945 | -0.3749867089 | -5.4369997221 |
| H26  | -2.4351201989 | -0.2118473360 | -3.6674823580 |
| H27  | -1.0077982867 | -0.8440762699 | -4.5292969546 |
| C28  | -2.1891041754 | -3.1191306352 | -5.5863785670 |
| H29  | -2.5690588398 | -2.6848198812 | -6.5165343611 |
| H30  | -1.0942580270 | -3.1319406441 | -5.6549237429 |
| H31  | -2.5626113332 | -4.1477890808 | -5.5167765284 |
| N32  | 1.8030495544  | 0.8129042081  | -1.6589108089 |
| C33  | 2.7422262338  | 0.5906567383  | -2.7587766111 |
| H34  | 3.3021962347  | 1.5083557060  | -3.0067164275 |
| H35  | 3.4557674956  | -0.1923368502 | -2.4795707922 |
| H36  | 2.1948687906  | 0.2643501357  | -3.6502592035 |
| C37  | 0.8134147282  | 1.8315414435  | -2.0152737970 |
| H38  | 1.2896117937  | 2.8095773732  | -2.2004892442 |

---

|     |              |              |               |
|-----|--------------|--------------|---------------|
| H39 | 0.2780068135 | 1.5272957867 | -2.9213345756 |
| H40 | 0.0895292253 | 1.9448514400 | -1.2004771305 |
| C41 | 2.5085601957 | 1.1860170638 | -0.4314484480 |
| H42 | 3.0630217129 | 2.1316587256 | -0.5557977977 |
| H43 | 1.7871060741 | 1.3094828597 | 0.3843965392  |
| H44 | 3.2163325529 | 0.3957749746 | -0.1570150432 |

**Alternative addition product from Br<sub>2</sub> starting material**

File:jag\_4Br2\_ipso\_I\_NMe3\_prod\_opt\_wB97XD\_LACVPs/jag\_4Br2\_ipso\_I\_NMe3\_prod\_opt\_wB97

X-D\_LACVPs.out; structure: final

Method: DFT(wb97x-d)/lacvp\*; Solvent: water

Total Quantum Mechanical Energy: -794.444219815 au

Solution phase energy: -794.35870894336 au

Gibbs free energy: -794.043837 au

Low frequencies 49.56 59.40 77.51 84.37 90.98 98.45

|      |               |               |               |
|------|---------------|---------------|---------------|
| I1   | -0.2594983420 | -1.0896045726 | -0.5993953483 |
| C2   | -1.3390527612 | -4.0128060675 | -0.8469190345 |
| C3   | -1.3797944634 | -2.8303462462 | -0.1015670550 |
| C4   | -2.2070871800 | -2.7921524304 | 1.0222397051  |
| C5   | -2.9547880424 | -3.9069430563 | 1.3934189313  |
| C6   | -2.8813303871 | -5.0862726991 | 0.6548022205  |
| C7   | -2.0685124518 | -5.1402954664 | -0.4713898838 |
| B8   | -3.2422042797 | -2.7134559633 | -2.9926738643 |
| H9   | -2.2708342235 | -1.8829046999 | 1.6136638516  |
| H10  | -3.5982331653 | -3.8484456599 | 2.2671980835  |
| H11  | -3.4645101055 | -5.9556854973 | 0.9422423214  |
| H12  | -2.0115443622 | -6.0407913316 | -1.0777370313 |
| Br13 | -4.1005589120 | -1.0531827575 | -2.5736763388 |
| Br14 | -4.2320122736 | -4.3371192225 | -3.2713238710 |
| N16  | -0.5632685094 | -4.1185406748 | -2.0645876686 |
| C17  | -0.8736057943 | -3.5105631166 | -3.1703123999 |
| O18  | -1.8903175910 | -2.6676678738 | -3.1494761368 |
| C19  | -0.1182045387 | -3.5882296422 | -4.4659422918 |
| C20  | -1.1323038442 | -3.9686885678 | -5.5709225061 |
| H21  | -0.5891030657 | -4.0391274823 | -6.5189834934 |

---

|     |               |               |               |
|-----|---------------|---------------|---------------|
| H22 | -1.6027469247 | -4.9377027488 | -5.3703914135 |
| H23 | -1.9112667135 | -3.2073215030 | -5.6896230010 |
| C24 | 0.4435535034  | -2.1726455523 | -4.7489724856 |
| H25 | 0.9603295334  | -2.2017082181 | -5.7140779982 |
| H26 | -0.3570530723 | -1.4286340661 | -4.8094740303 |
| H27 | 1.1602645972  | -1.8635789964 | -3.9809728332 |
| C28 | 1.0111125033  | -4.6193733570 | -4.3865424119 |
| H29 | 1.5196969717  | -4.6519183859 | -5.3551162524 |
| H30 | 1.7579657157  | -4.3484390080 | -3.6300214456 |
| H31 | 0.6245315828  | -5.6239503112 | -4.1754453715 |
| N32 | 1.0571727735  | 1.4286989933  | -1.3334573566 |
| C33 | 0.6086894183  | 1.7418895387  | -2.6853502187 |
| H34 | 0.9936537308  | 2.7173735382  | -3.0359861650 |
| H35 | 0.9609139603  | 0.9669941063  | -3.3747351906 |
| H36 | -0.4859330145 | 1.7694125156  | -2.7165434255 |
| C37 | 0.5980517732  | 2.4390912089  | -0.3869254542 |
| H38 | 1.0075692929  | 3.4400840255  | -0.6169821739 |
| H39 | -0.4955236300 | 2.4993082588  | -0.4110716971 |
| H40 | 0.9076032947  | 2.1632751527  | 0.6269041497  |
| C41 | 2.5077754152  | 1.2898242517  | -1.2868755326 |
| H42 | 3.0255682845  | 2.2238402782  | -1.5734034561 |
| H43 | 2.8206037146  | 1.0178093916  | -0.2732062057 |
| H44 | 2.8243299656  | 0.4958654811  | -1.9721508007 |
| H45 | 0.2547585869  | -4.7374783246 | -2.0510925440 |



## 9. Single crystal X-ray diffraction

A suitable single crystal of **4a** data was collected on a Rigaku XtaL AB Synergy-DW diffractor equipped with a HyPix-Arc 150° detector using CuK $\alpha$  radiation at  $\lambda = 1.54184 \text{ \AA}$ . The data diffraction was obtained and processed with CrysAlisPro software.<sup>35,36</sup> Direct methods was used for all crystal structures and the refinements were established by full-matrix least square with SHELXL,<sup>37</sup> SHELXT<sup>37</sup> and Olex2<sup>38</sup> softwares. Gaussian absorption correction was applied for absorption effects. Anisotropic refinement was applied to all non-hydrogen atoms. All hydrogen except the hydrogen attached to the amine nitrogen were placed with geometric constraints and refined isotropically. The hydrogen attached to the N amine was found in the difference electron density map and was refined isotropically.

**Table S2.** Crystallographic data and refinement of **4a**.

|                                                  |                                                                                             |
|--------------------------------------------------|---------------------------------------------------------------------------------------------|
| Code                                             | <b>4a</b>                                                                                   |
| Structural formula                               | C <sub>11</sub> H <sub>14</sub> B <sub>1</sub> F <sub>2</sub> N <sub>1</sub> O <sub>1</sub> |
| Molecular mass (g mol <sup>-1</sup> )            | 225.04                                                                                      |
| Data collection temp. (K)                        | 101 (3)                                                                                     |
| Crystal system                                   | Orthorhombic                                                                                |
| Space group                                      | <i>P</i> 2 <sub>1</sub> 2 <sub>1</sub> 2 <sub>1</sub>                                       |
| a (Å)                                            | 6.4333(2)                                                                                   |
| b (Å)                                            | 11.2099(3)                                                                                  |
| c (Å)                                            | 15.6487(5)                                                                                  |
| $\alpha$ (°)                                     | 90                                                                                          |
| $\beta$ (°)                                      | 90                                                                                          |
| $\gamma$ (°)                                     | 90                                                                                          |
| Volume (Å <sup>3</sup> )                         | 1128.53(6)                                                                                  |
| Z                                                | 4                                                                                           |
| Dc, calc density (g cm <sup>-3</sup> )           | 1.325                                                                                       |
| Absorption coefficient (mm <sup>-1</sup> )       | 0.891                                                                                       |
| $\theta$ range                                   | 4.847- 75.286                                                                               |
| Reflections collected                            | 10669                                                                                       |
| No data I >2 sigma ( <i>I</i> )                  | 1972                                                                                        |
| Final <i>R</i> indices [I >2 sigma ( <i>I</i> )] | R <sub>1</sub> = 0.0921<br>wR <sub>2</sub> = 0.2194                                         |
| <i>R</i> indices (all data)                      | R <sub>1</sub> = 0.1000                                                                     |

---

|                                                 |                          |
|-------------------------------------------------|--------------------------|
|                                                 | wR <sub>2</sub> = 0.2245 |
| Goodness-of-fit on $F^2$                        | 1.073                    |
| Largest diff. peak and hole (eÅ <sup>-3</sup> ) | 0.291; -0.254            |
| CCDC no.                                        | 2279239                  |

---

## 10. Reference

- [1] J. Lv, X. Chen, X. S. Xue, B. Zhao, Y. Liang, M. Wang, L. Jin, Y. Yuan, Y. Han, Y. Zhao, Y. Lu, J. Zhao, W. Y. Sun, K. N. Houk, Z. Shi, *Nature* 2019, **575**, 336–340.
- [2] Y. Gao, Y. Mao, B. Zhang, Y. Zhan, Y. Huo, *Org. Biomol. Chem.* 2018, **16**, 3881–3884.
- [3] R. S. Dothager, K. S. Putt, B. J. Allen, B. J. Leslie, V. Nesterenko, P. J. Hergenrother, *J. Am. Chem. Soc.* 2005, **127**, 8686–8696.
- [4] M. Kumar, S. Verma, A. K. Verma, *Org. Lett.* 2020, **22**, 4620–4626.
- [5] T. Xiong, Y. Li, X. Bi, Y. Lv, Q. Zhang, *Angew. Chemie - Int. Ed.* 2011, **50**, 7140–7143.
- [6] X. Zhu, M. Xu, J. Sun, D. Guo, Y. Zhang, S. Zhou, S. Wang, *Eur. J. Org. Chem.* 2021, **2021**, 5213–5218.
- [7] J. Khan, N. Yadav, A. Tyagi, C. K. Hazra, *J. Org. Chem.* 2022, **87**, 11097–11111.
- [8] E. Kianmehr, H. Afaridoun, *Synthesis* 2021, **53**, 1513–1523.
- [9] R. Das, M. Kapur, *J. Org. Chem.* 2017, **82**, 1114–1126.
- [10] Á. Sinai, Á. Mészáros, T. Gáti, V. Kudar, A. Palló, Z. Novák, *Org. Lett.* 2013, **15**, 5654–5657.
- [11] D. J. C. Prasad, G. Sekar, *Org. Biomol. Chem.* 2013, **11**, 1659–1665.
- [12] J. I. Urzúa, R. Contreras, C. O. Salas, R. A. Tapia, *RSC Adv.* 2016, **6**, 82401–82408.
- [13] X. Abel-Snape, A. Whyte, M. Lautens, *Org. Lett.* 2020, **22**, 7920–7925.
- [14] Y. Y. Zhu, H. P. Yi, C. Li, X. K. Jiang, Z. T. Li, *Cryst. Growth Des.* 2008, **8**, 1294–1300.
- [15] N. Chaisan, S. Ruengsangtongkul, J. Tummatorn, S. Ruchirawat, K. Chainok, C. Thongsornkleeb, *J. Org. Chem.* 2021, **86**, 4671–4698.
- [16] S. Redon, Y. Kabri, M. D. Crozet, P. Vanelle, *Tetrahedron Lett.* 2014, **55**, 5052–5054.
- [17] C. Gimbert, A. Vallribera, *Org. Lett.* 2009, **11**, 269–271.
- [18] J. Clayden, H. Turner, M. Pickworth, T. Adler, *Org. Lett.* 2005, **7**, 3147–3150.
- [19] S. Sharma, K. C. Basavaraju, A. K. Singh, D. P. Kim, *Org. Lett.* 2014, **16**, 3974–3977.
- [20] F. Hasegawa, K. Kawamura, H. Tsuchikawa, M. Murata, *Bioorganic Med. Chem.* 2017, **25**, 4506–4511.
- [21] K. Ni, L. G. Meng, K. Wang, L. Wang, *Org. Lett.* 2018, **20**, 2245–2248.
- [22] N. Mishra, A. S. Singh, A. K. Agrahari, S. K. Singh, M. Singh, V. K. Tiwari, *ACS Comb. Sci.* 2019, **21**, 389–399.
- [23] W. Li, X. F. Wu, *J. Org. Chem.* 2014, **79**, 10410–10416.
- [24] Y. Zheng, M. Dong, E. Qu, J. Bai, X. F. Wu, W. Li, *Chem. Eur. J.* 2021, **27**, 16219–16224.
- [25] B. R. Aluri, B. Niaz, M. K. Kindermann, P. G. Jones, J. Heinicke, *Dalt. Trans.* 2011, **40**, 211–224.
- [26] G. Evindar, R. A. Batey, *J. Org. Chem.* 2006, **71**, 1802–1808.

- 
- [27] T. Saget, N. Cramer, *Angew. Chemie - Int. Ed.* 2013, **52**, 7865–7868.
- [28] J. Lu, X. Gong, H. Yang, H. Fu, *Chem. Commun.* 2010, **46**, 4172–4174.
- [29] H. K. Saini, N. K. Nandwana, S. Dhiman, K. Rangan, A. Kumar, *Eur. J. Org. Chem.* 2017, **2017**, 7277–7282.
- [30] C. Lu, N. A. Markina, R. C. Larock, *J. Org. Chem.* 2012, **77**, 11153–11160.
- [31] W. R. Bowman, H. Heaney, P. H. G. Smith, *Tetrahedron Lett.* 1982, **23**, 5093–5096.
- [32] R. Kumar, R. R. Nair, S. S. Dhiman, J. Sharma, O. Prakash, *Med. Chem. Res.* 2010, **19**, 541–550.
- [33] Z. Li, H. Sun, H. Jiang, H. Liu, *Org. Lett.* 2008, **10**, 3263–3266.
- [34] X. Abel-Snape, A. Whyte, M. Lautens, *Org. Lett.* 2020, **22**, 7920–7925.
- [35] CrysAlis CCD; Oxford Diffraction Ltd: Abingdon, Oxfordshire, UK, 2005.
- [36] CrysAlis RED; Oxford Diffraction Ltd: Abingdon, Oxfordshire, UK, 2005.
- [37] G. M. Sheldrick, *Acta Crystallogr., Sect. C: Struct Chem.* 2015, **71**, 3–8
- [38] O. V. Dolomay, L. J. Bourhis, R. J. Gildea, J. A. K. Howard, H. Puschman, *J. Appl. Crystallogr.* 2009, **42**, 339–341.

---

## **11. NMR spectra**

### **11.1. NMR spectra of starting materials:**

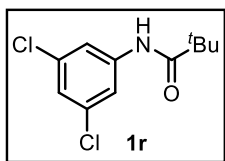

**<sup>1</sup>H NMR 400 MHz**

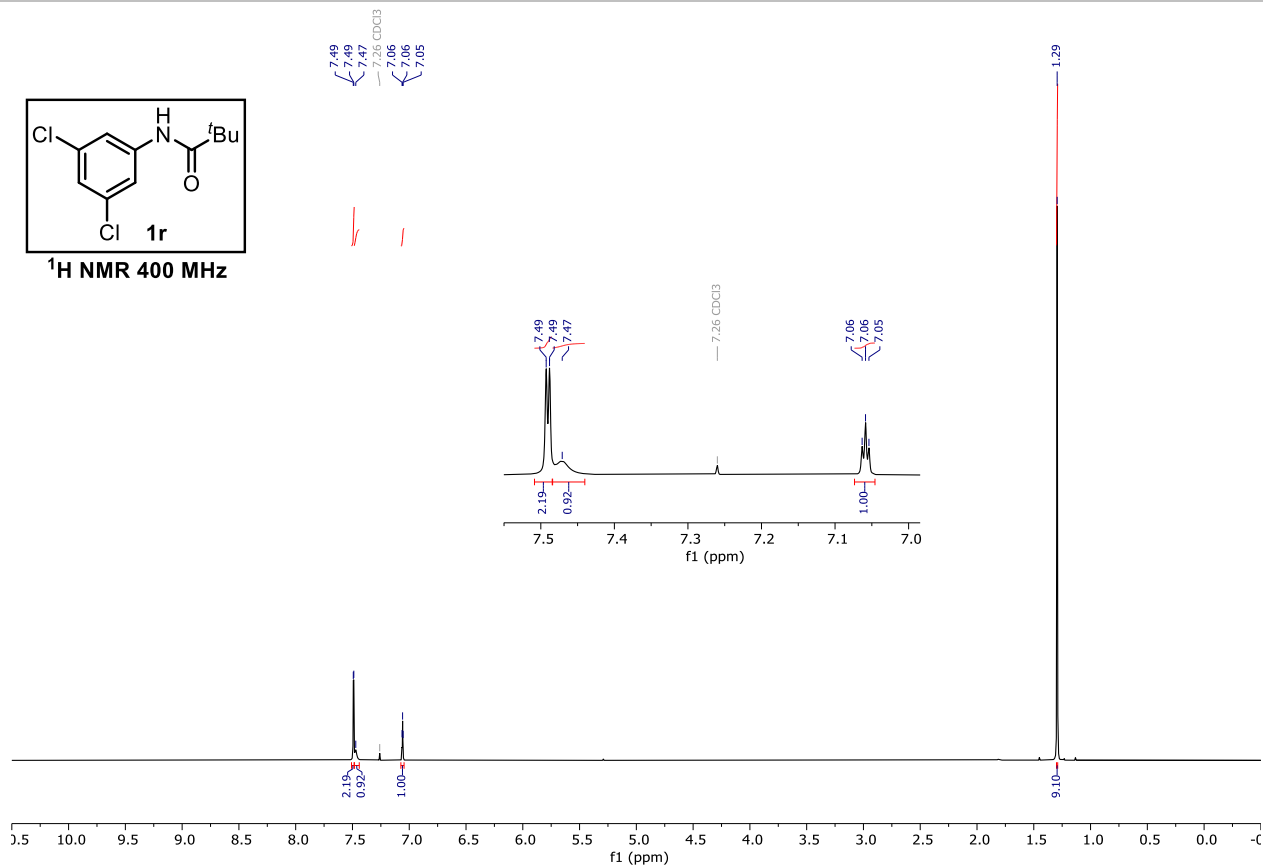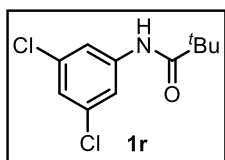

**<sup>13</sup>C NMR 101 MHz**

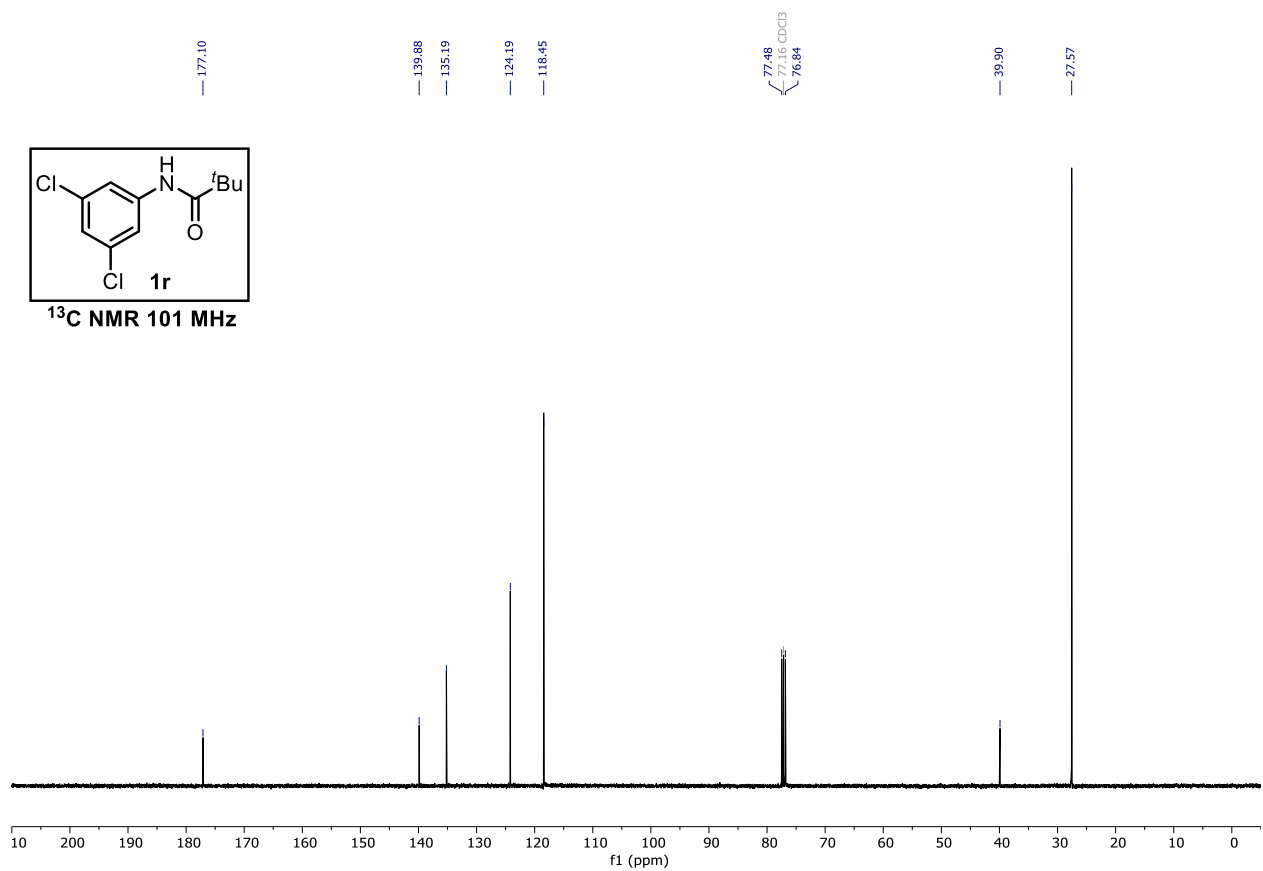

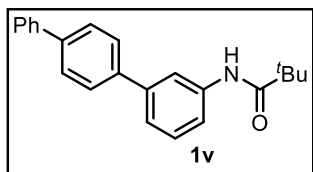

<sup>1</sup>H NMR 400 MHz

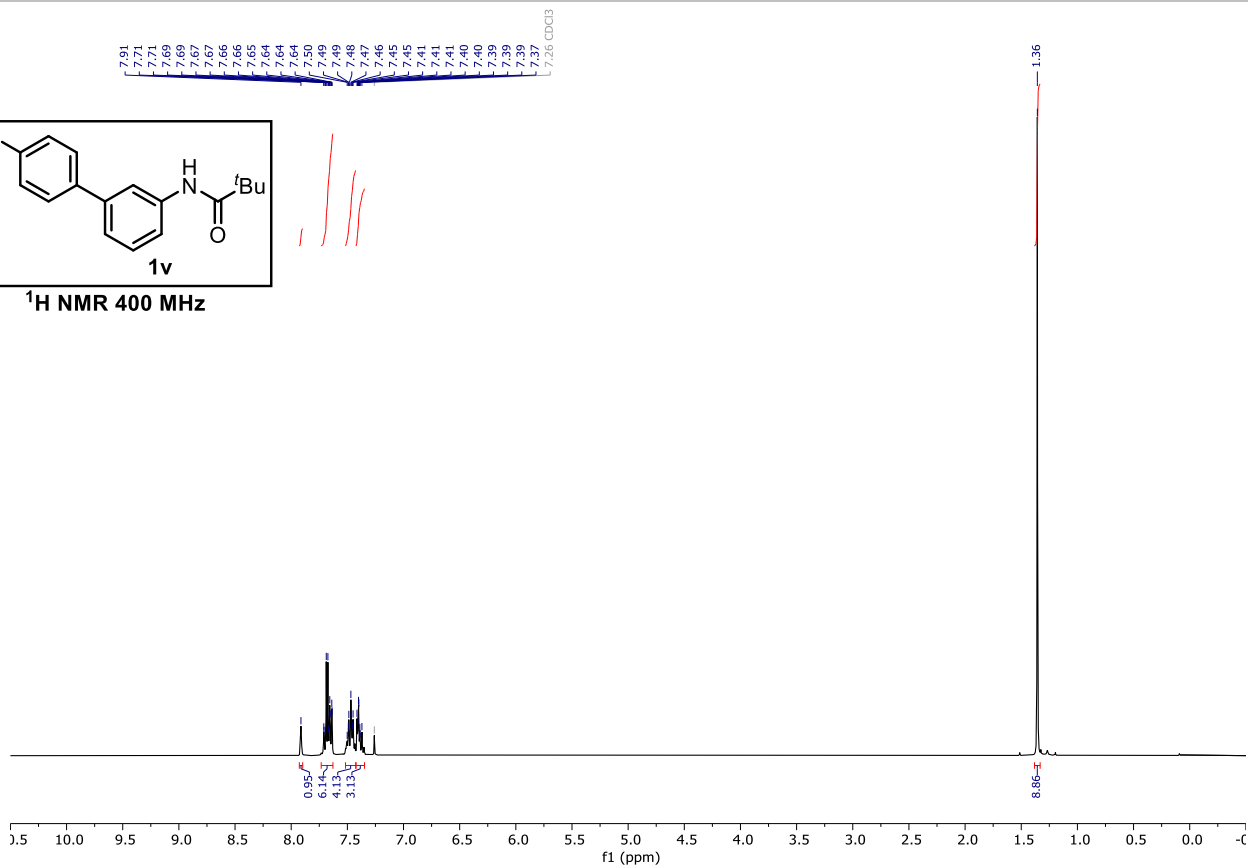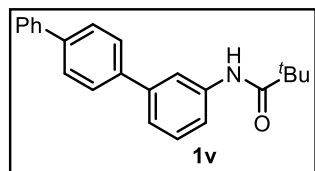

<sup>13</sup>C NMR 101 MHz

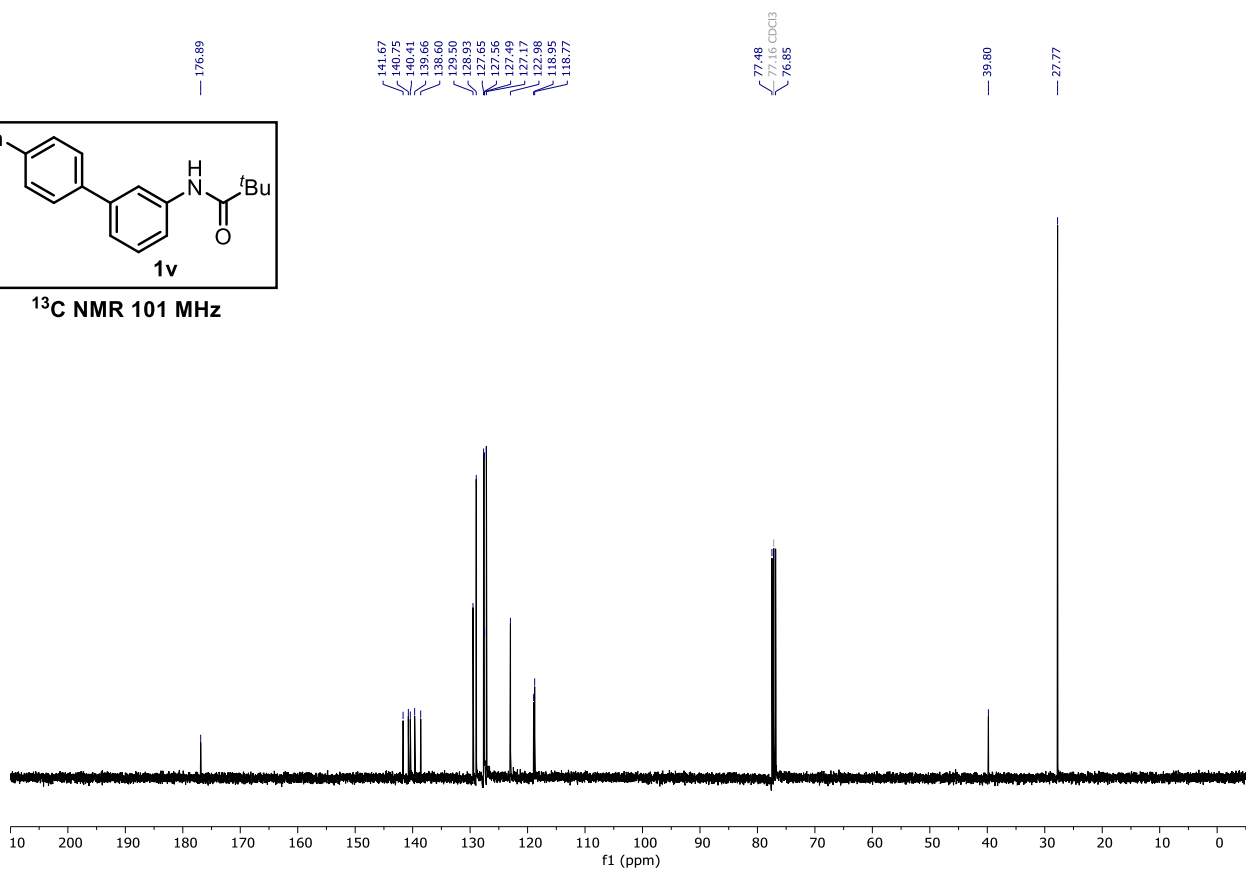

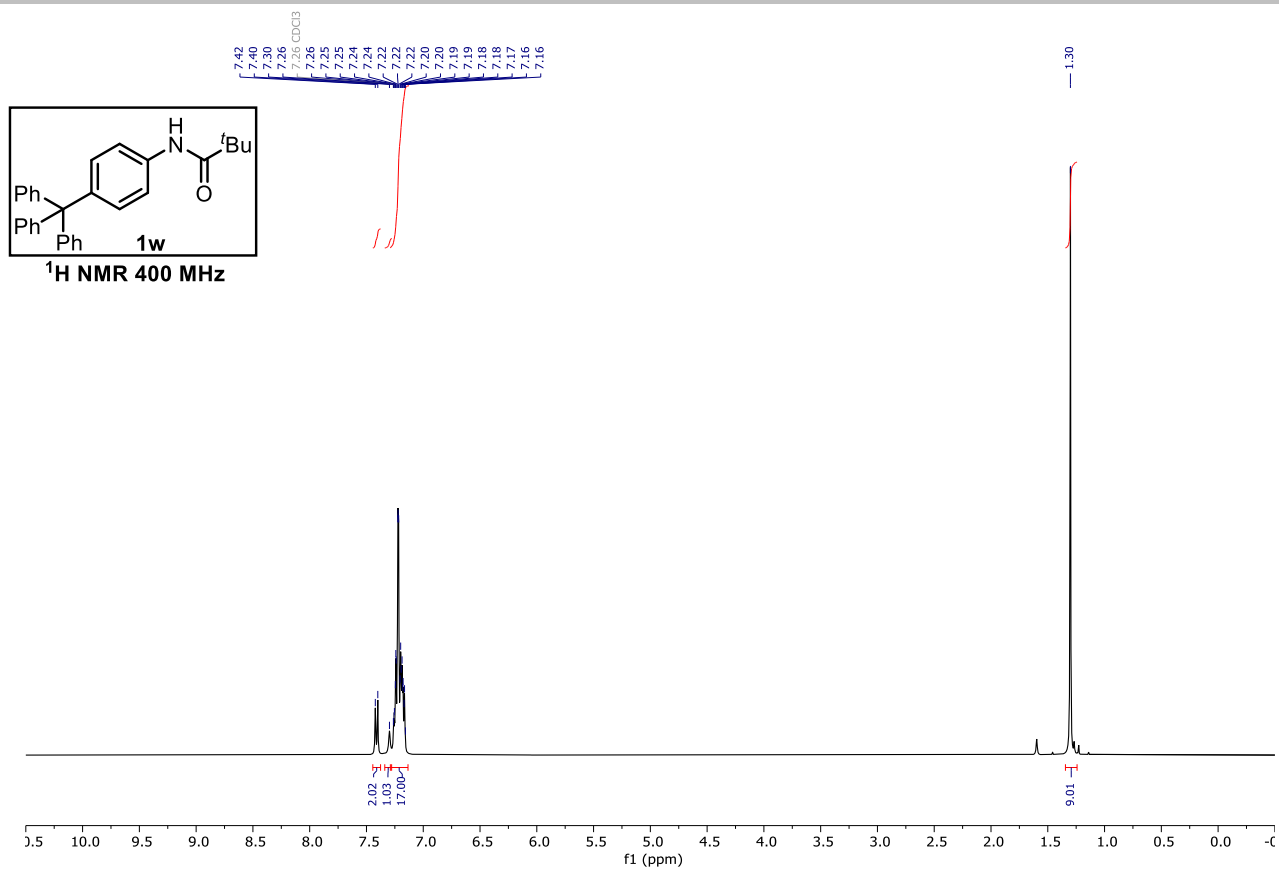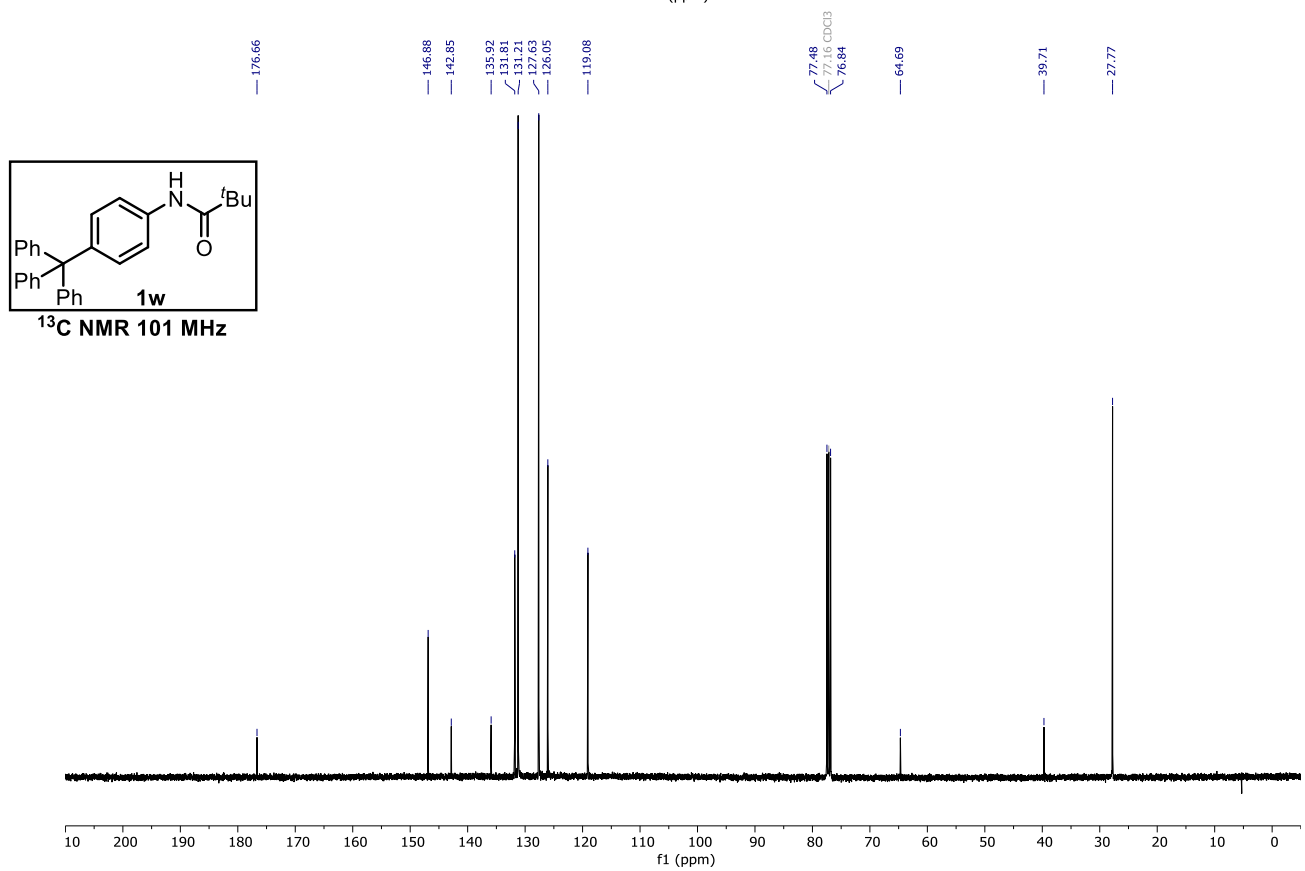



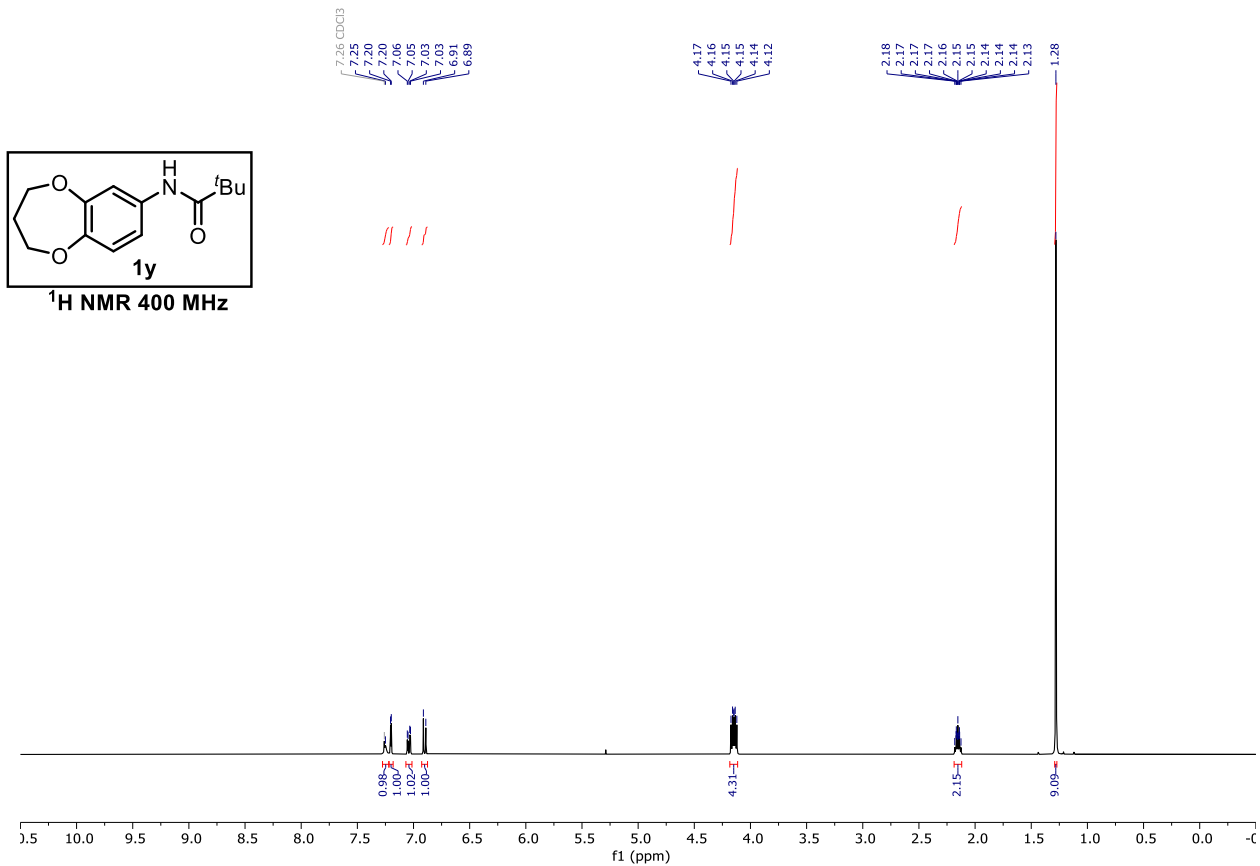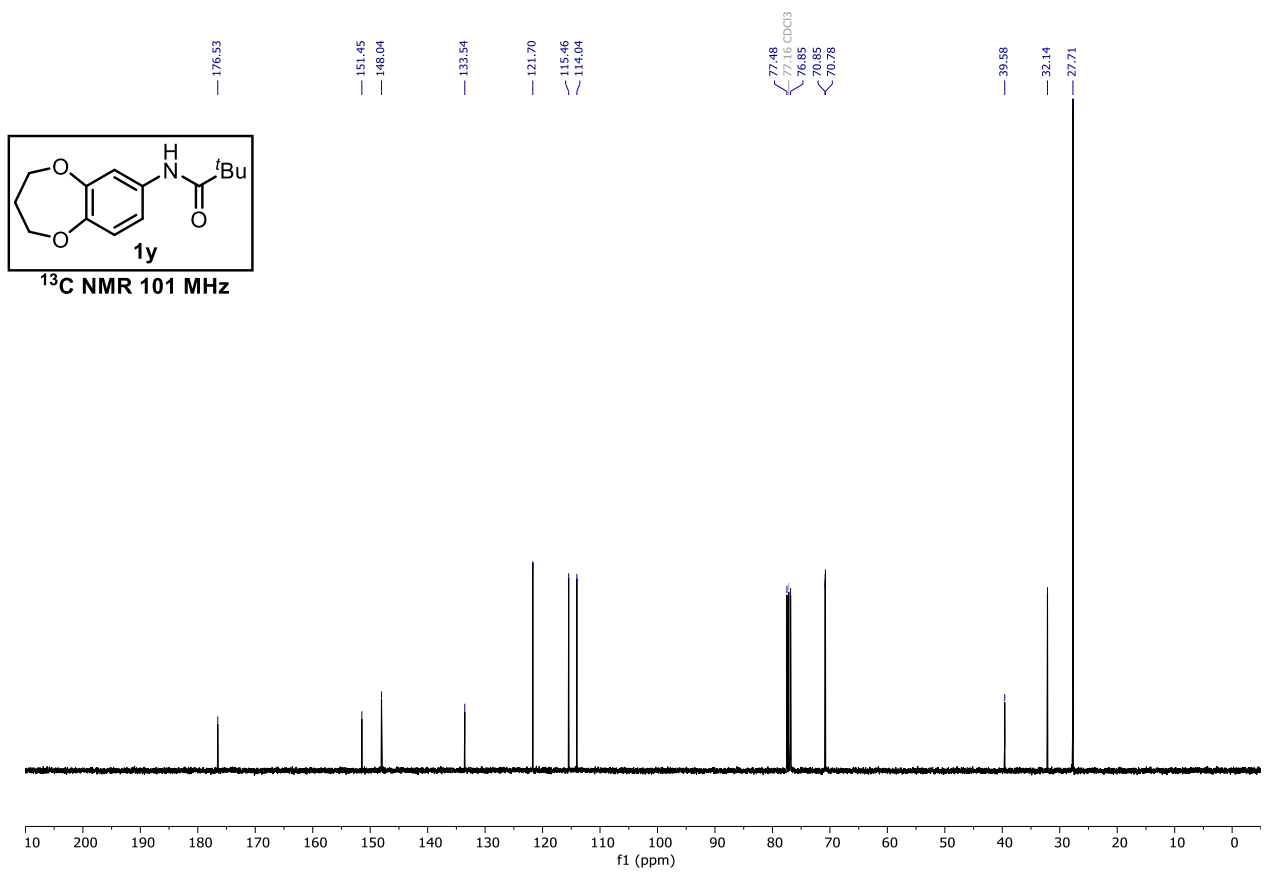

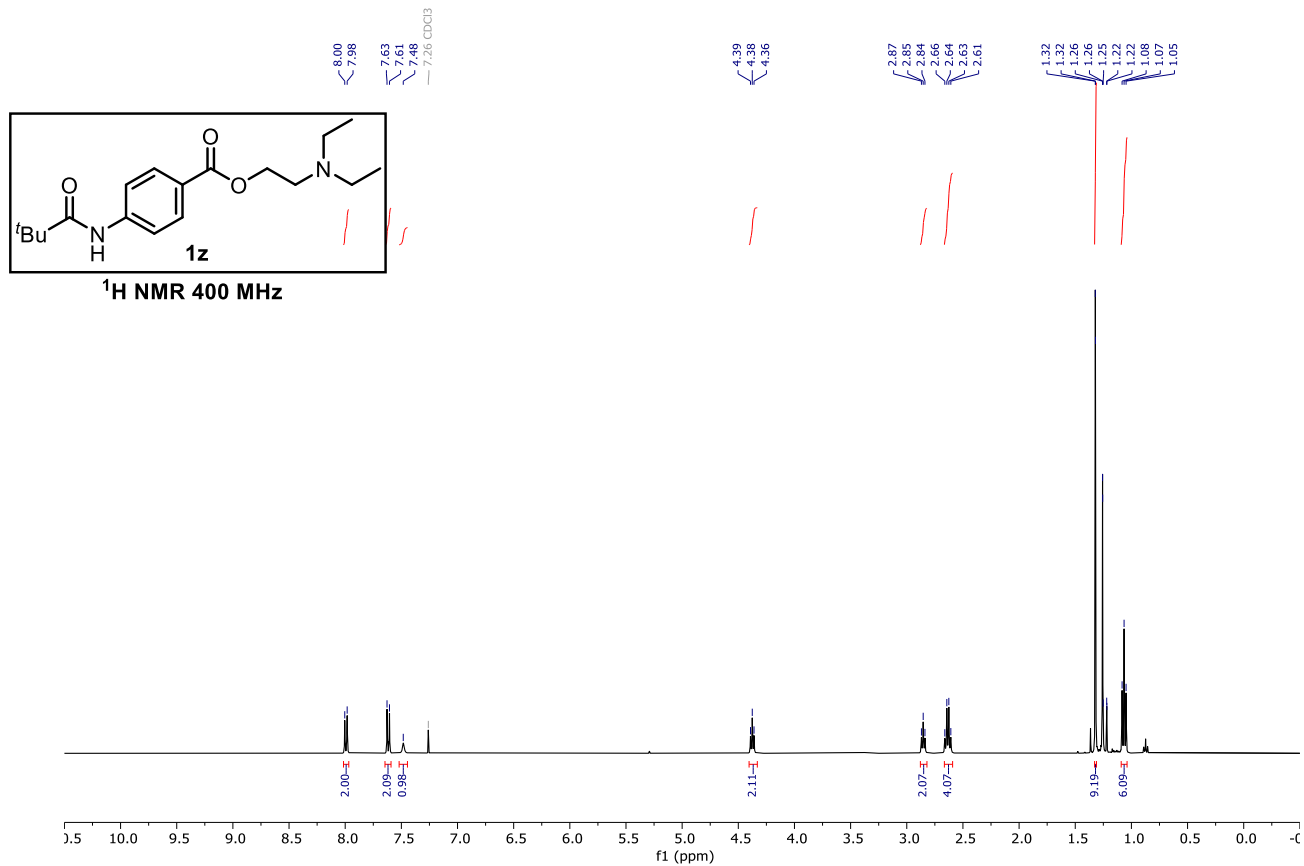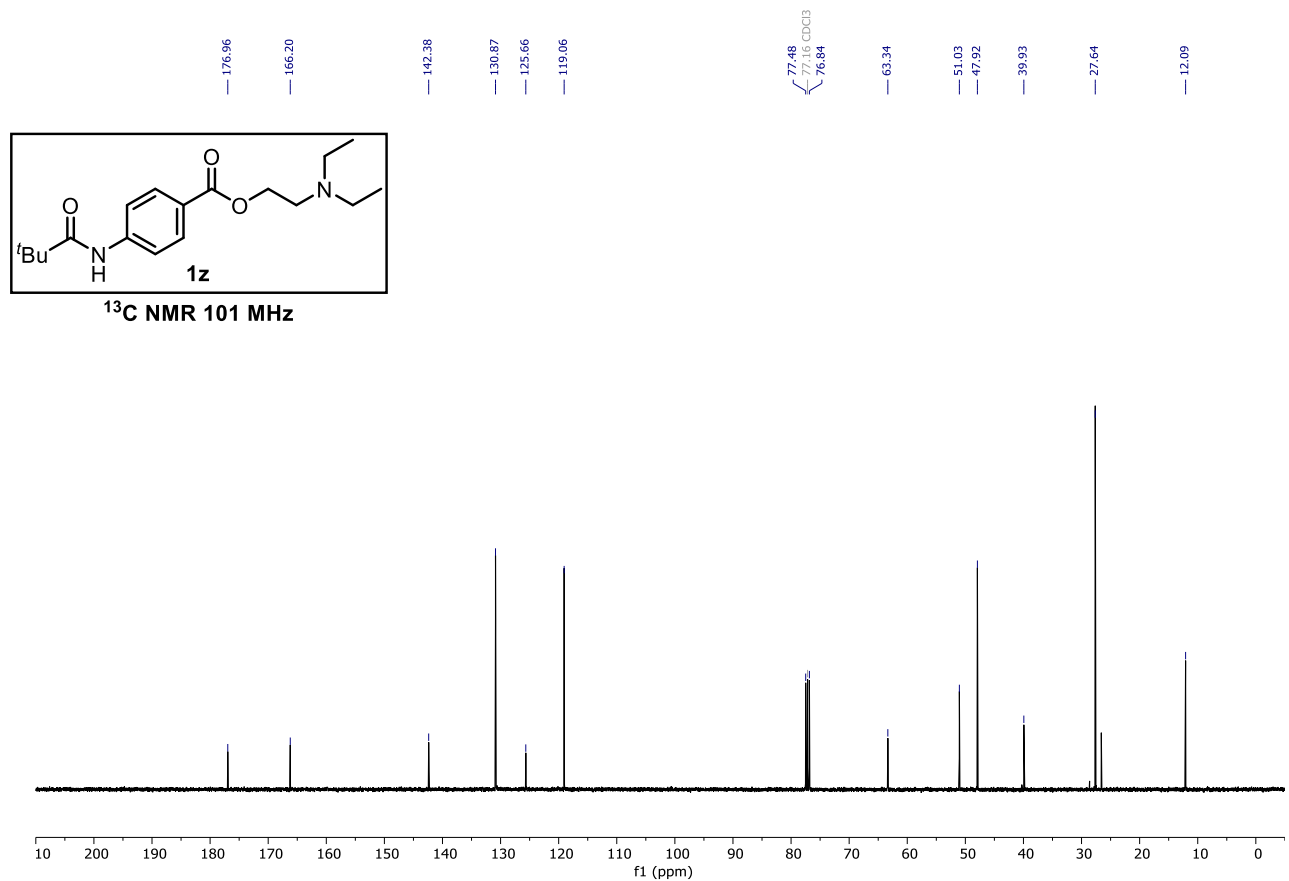

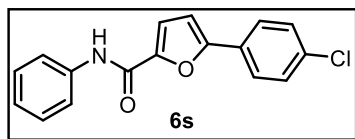

<sup>1</sup>H NMR 400 MHz

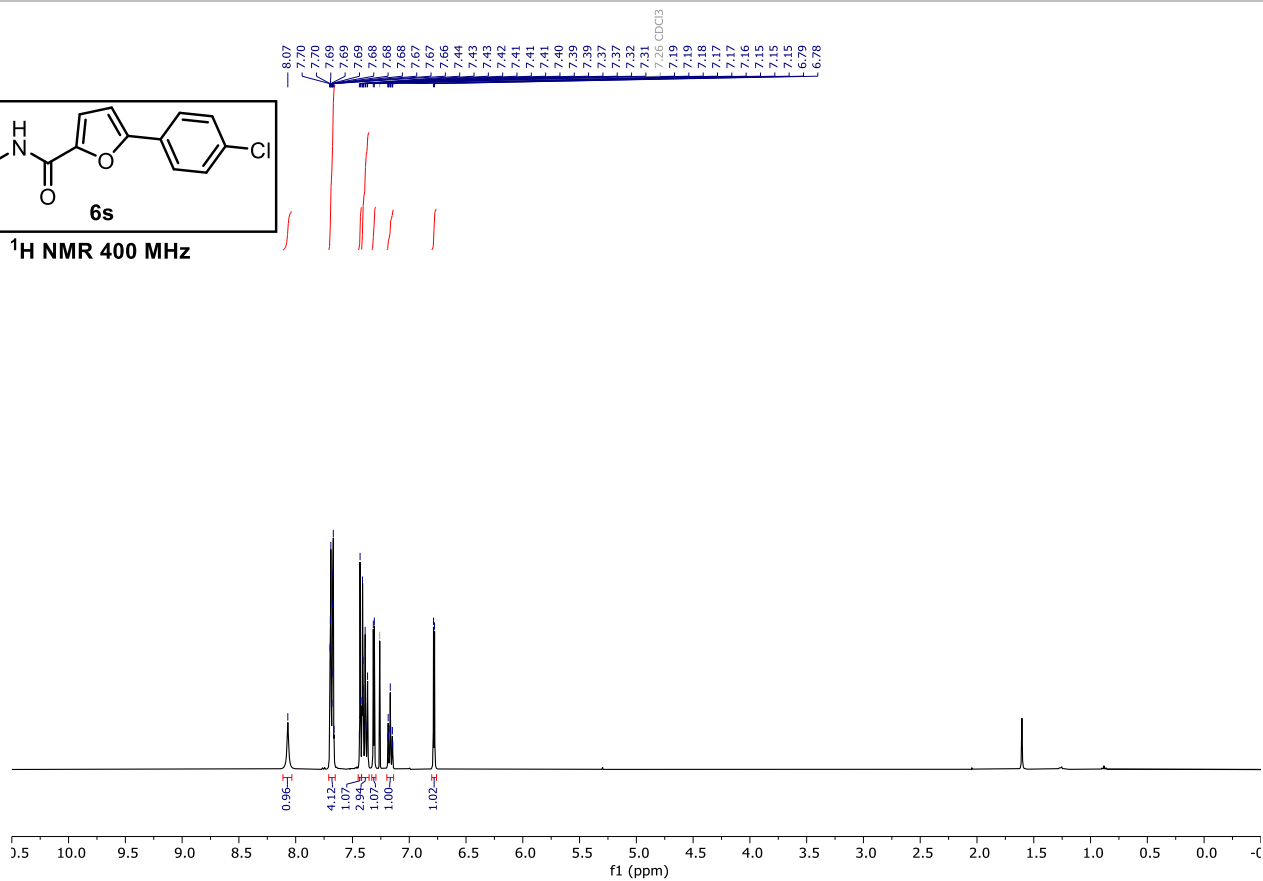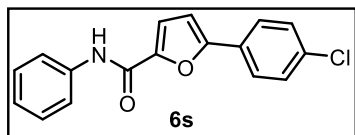

<sup>13</sup>C NMR 101 MHz

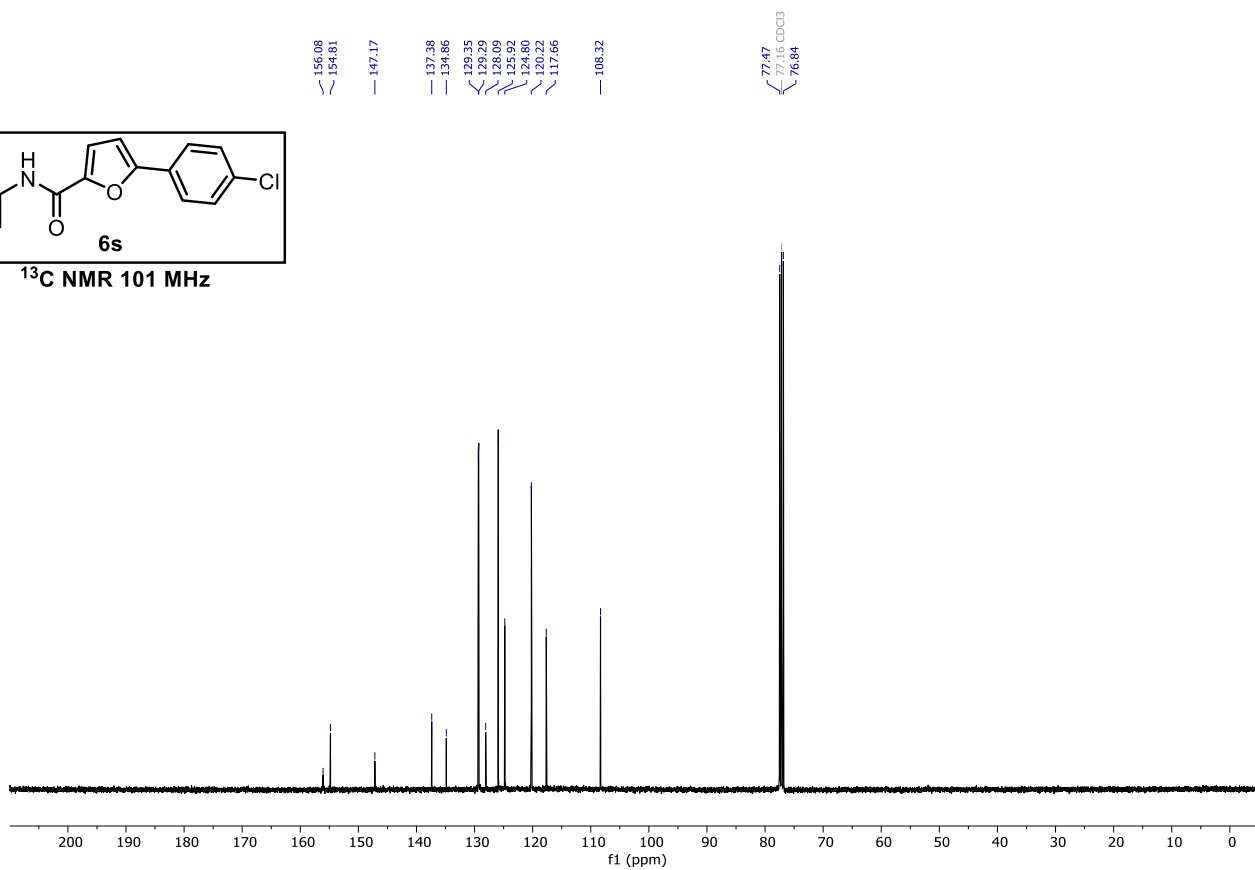

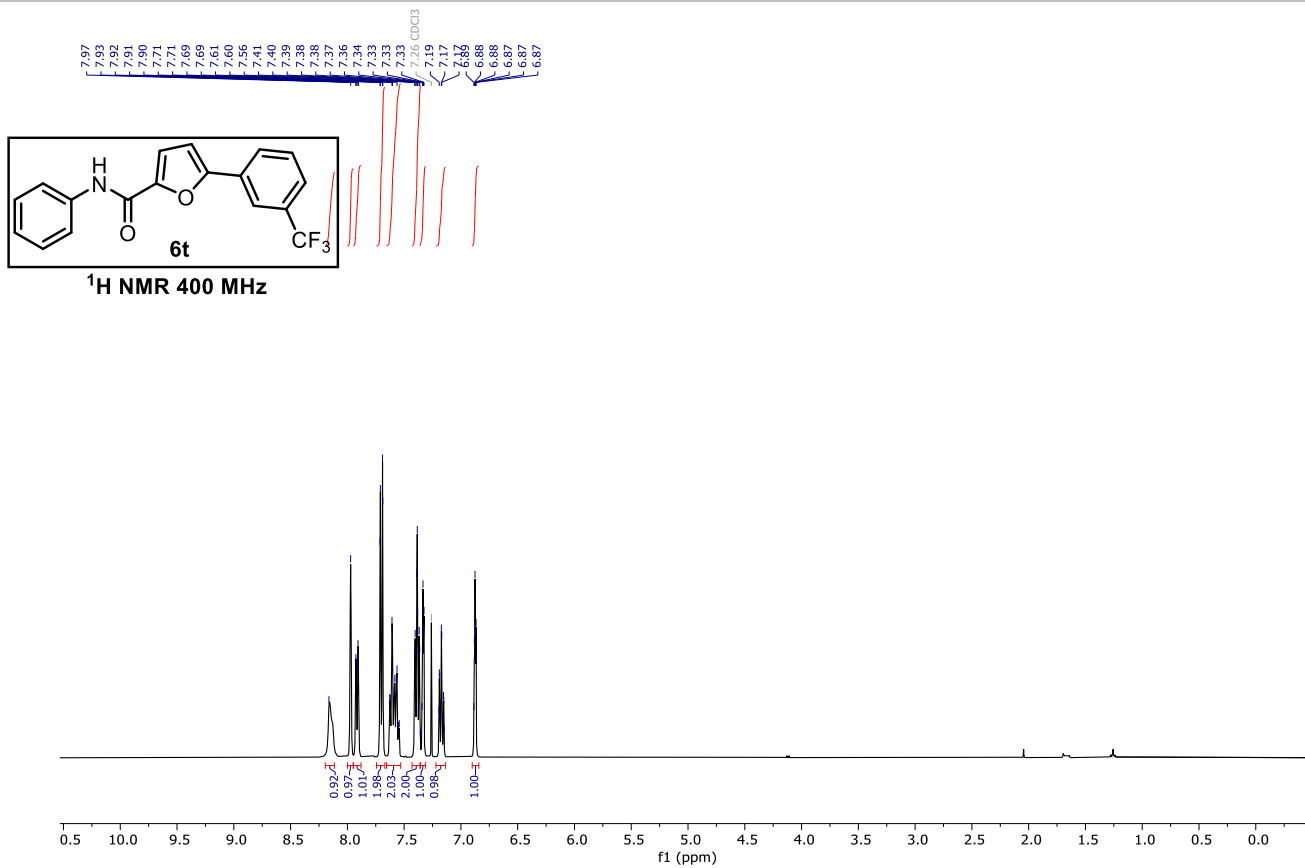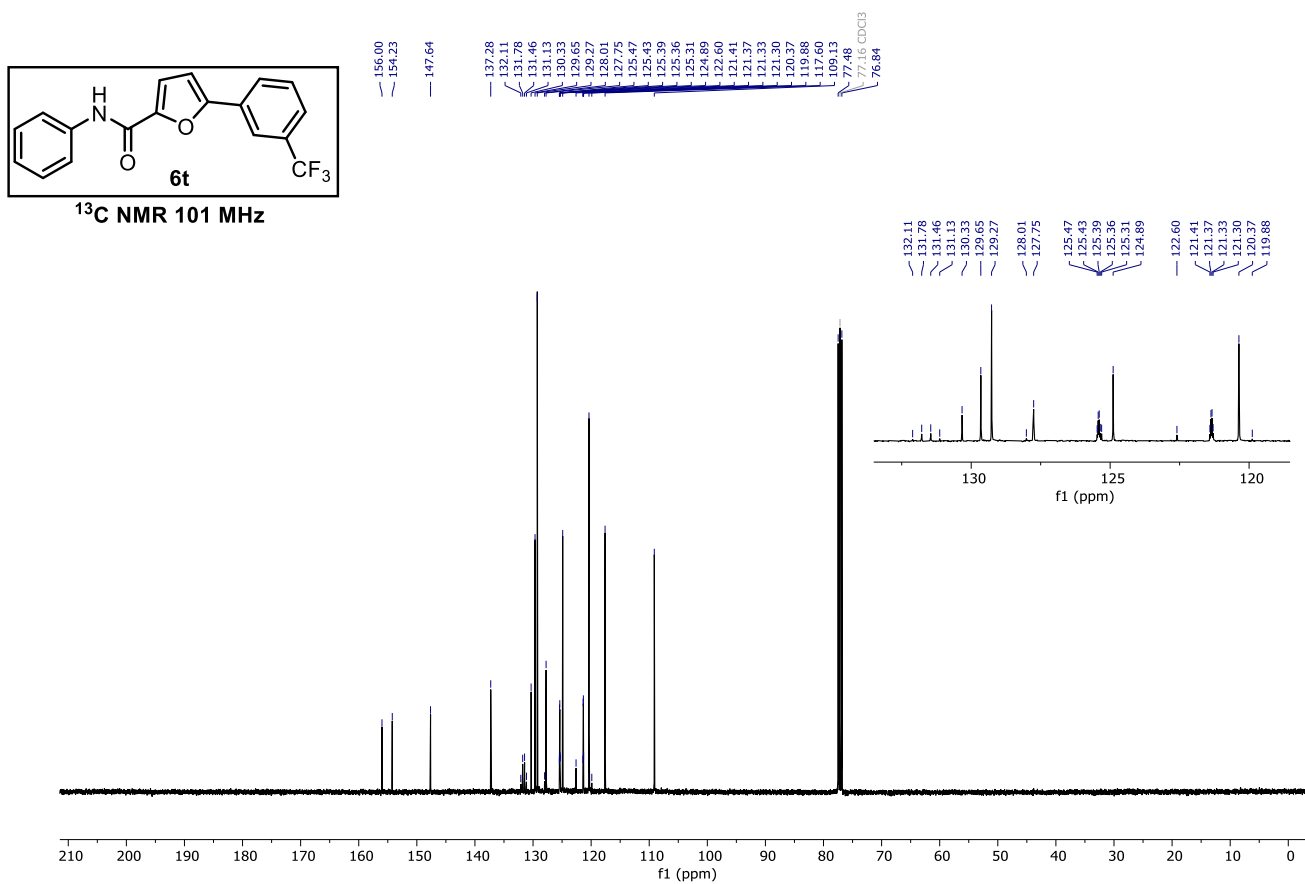

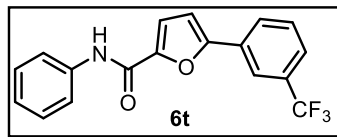

<sup>19</sup>F NMR 470 MHz

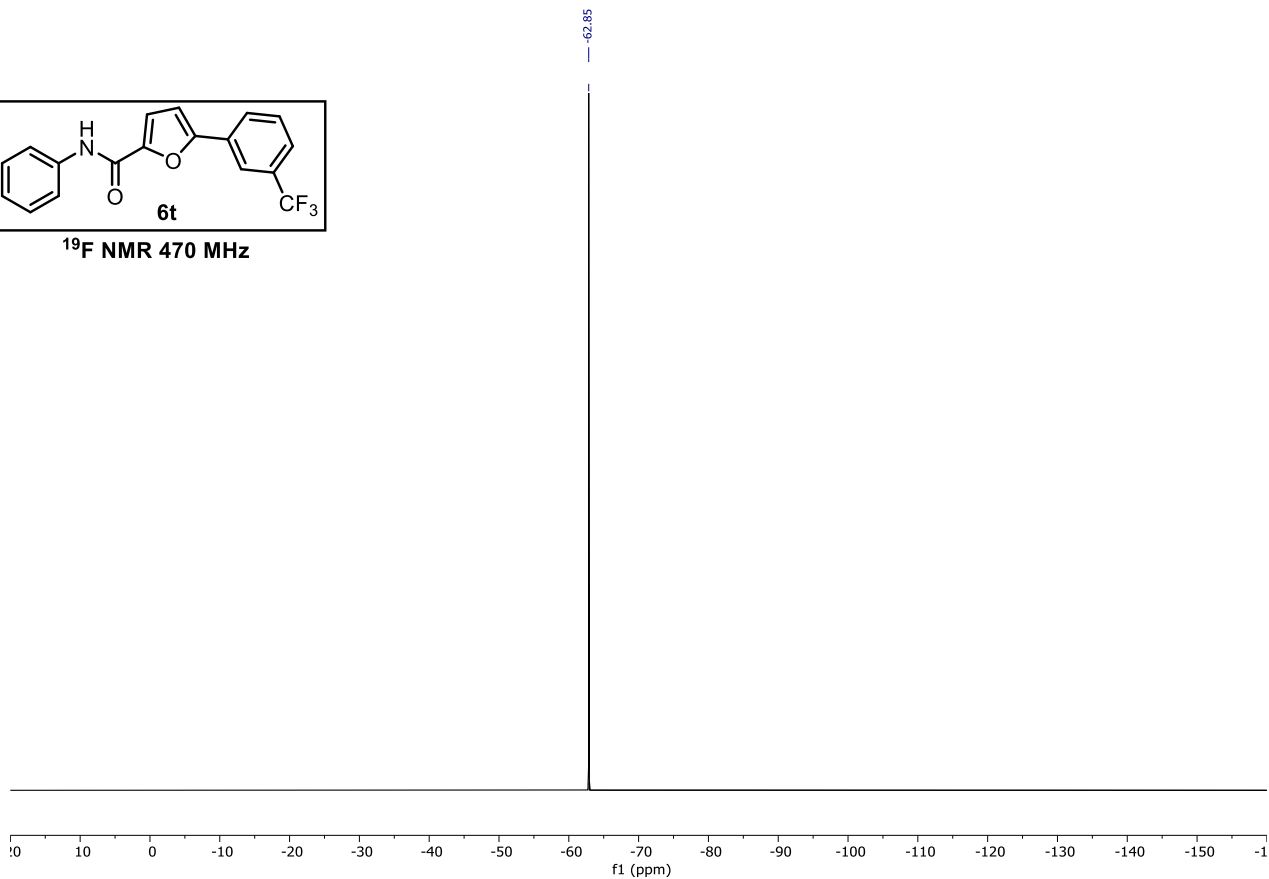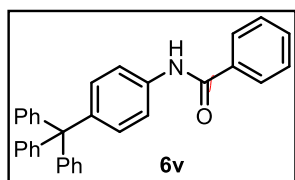

<sup>1</sup>H NMR 400 MHz

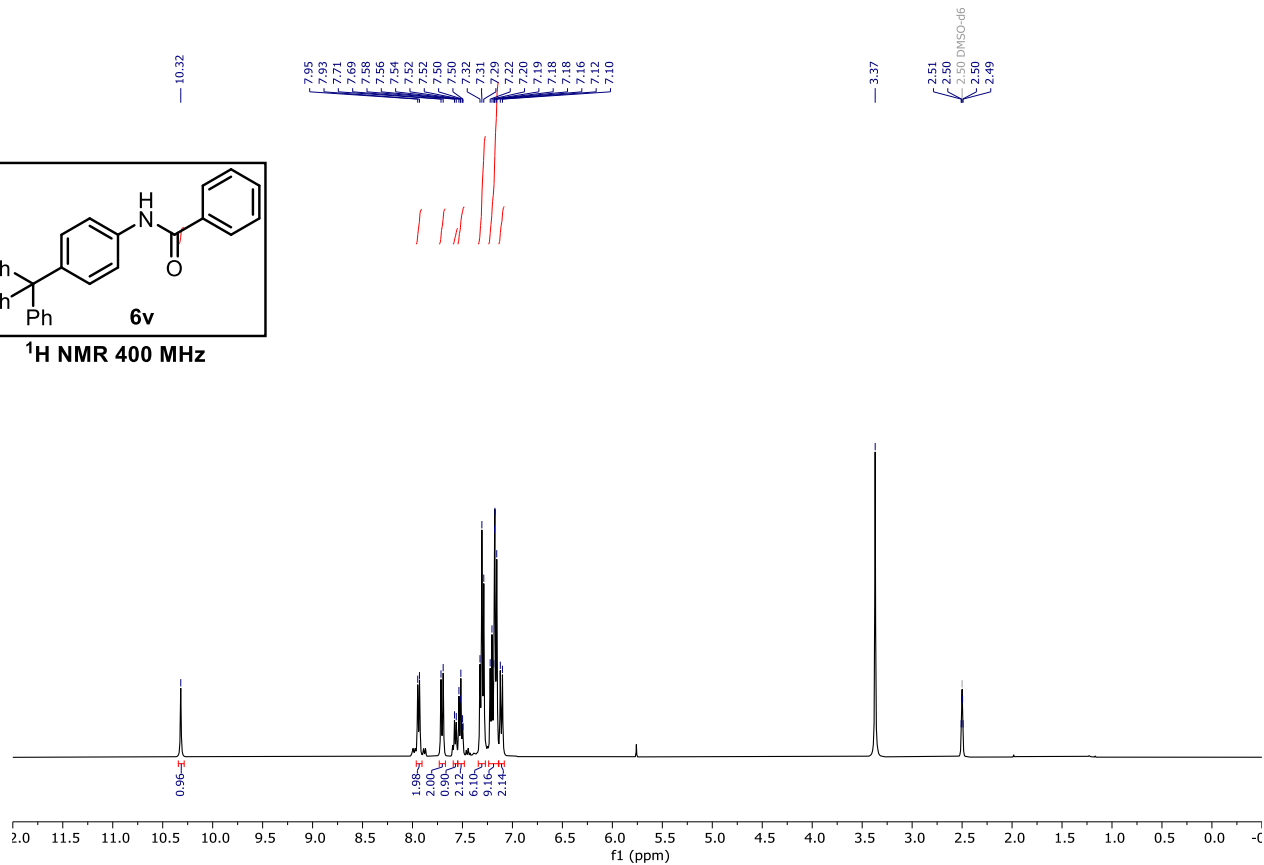

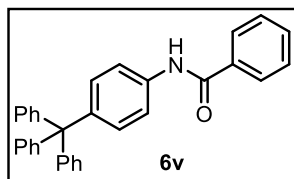

<sup>13</sup>C NMR 101 MHz

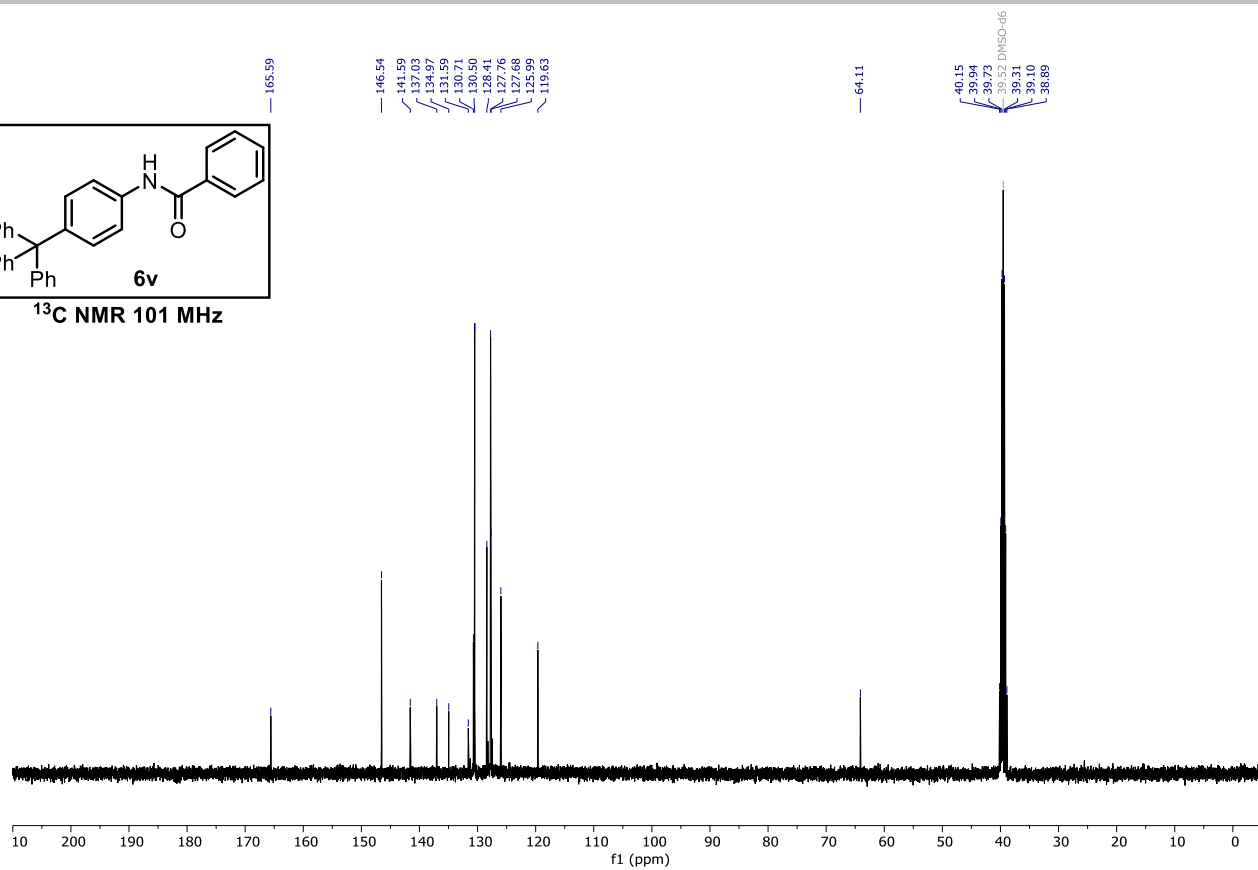

---

## **11.2. NMR spectra of target compounds**

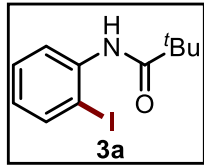

<sup>1</sup>H NMR 400 MHz

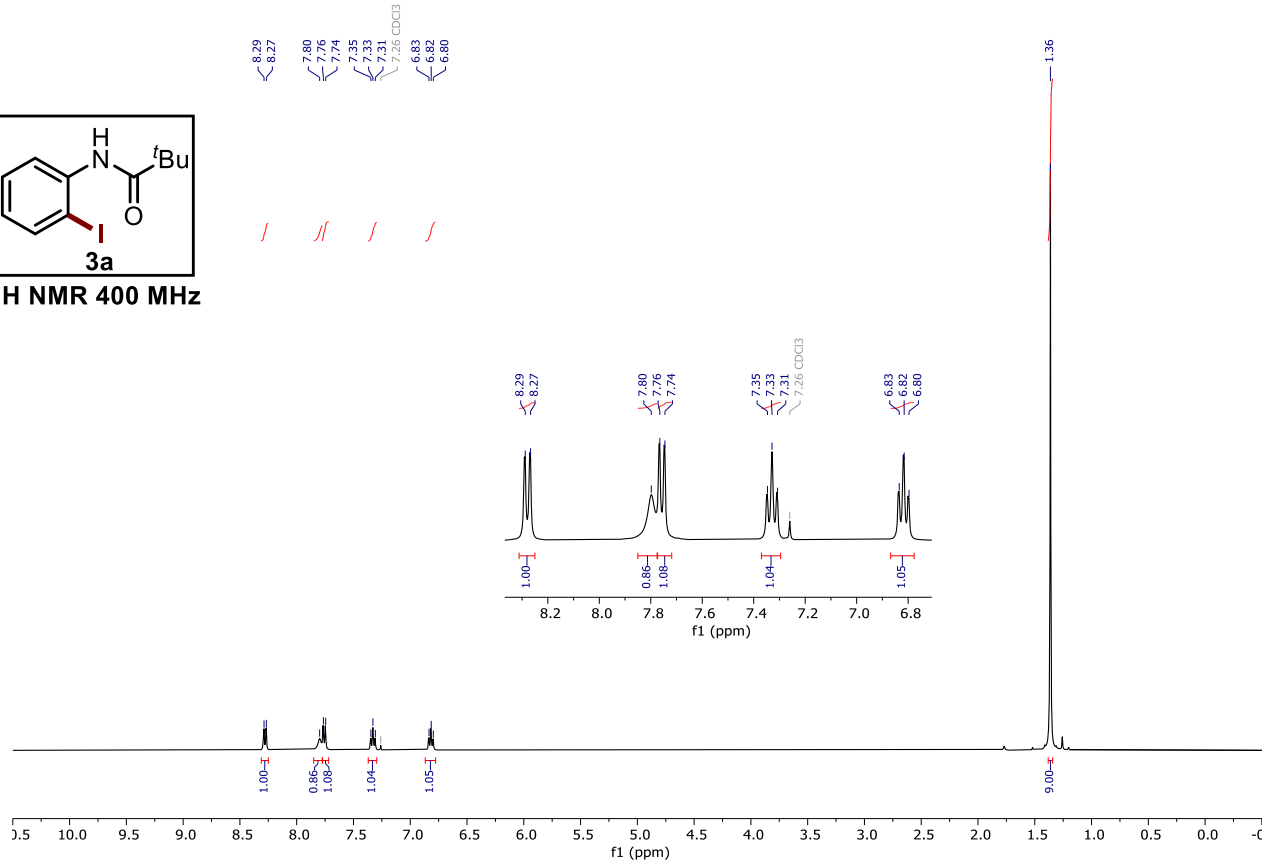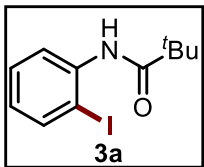

<sup>13</sup>C NMR 101 MHz

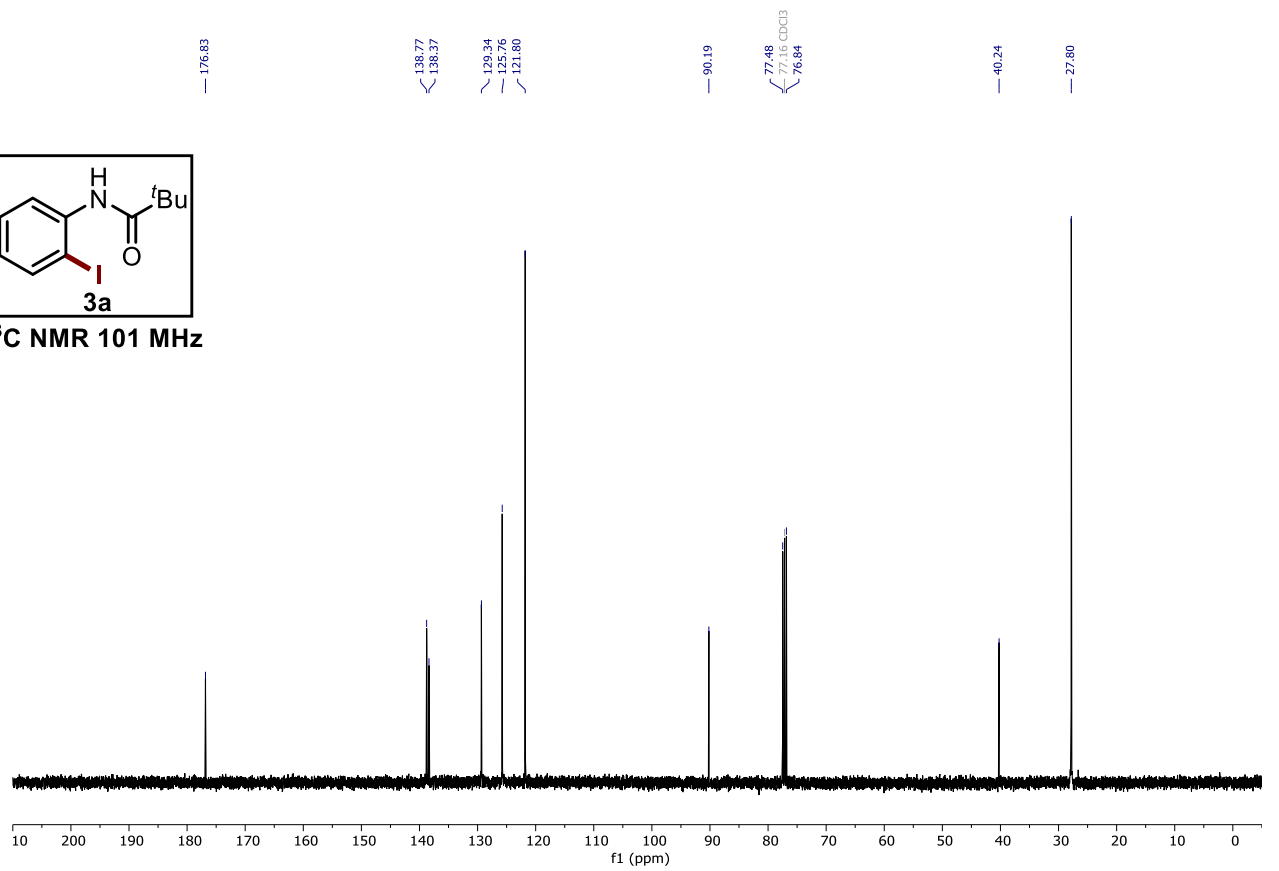



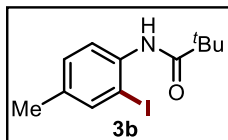

<sup>1</sup>H NMR 400 MHz

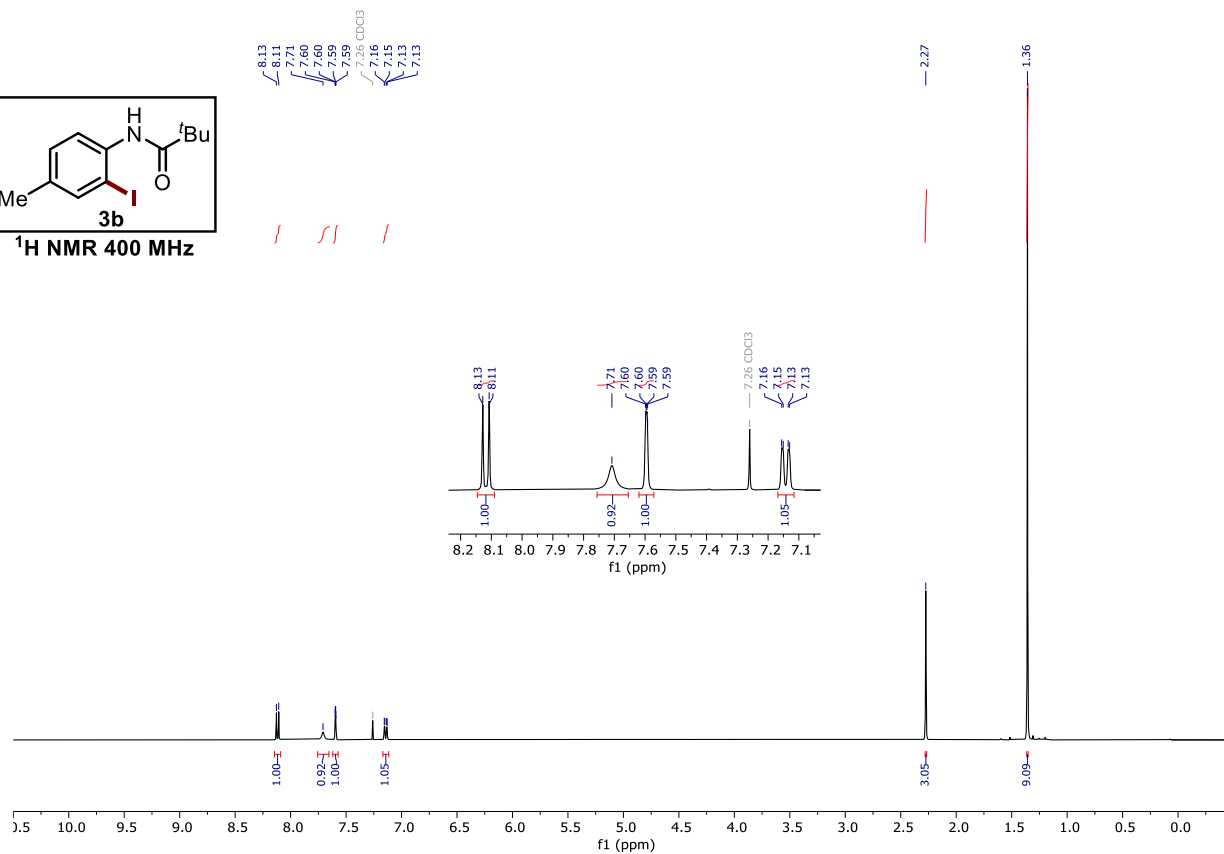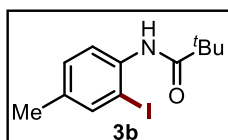

<sup>13</sup>C NMR 101 MHz

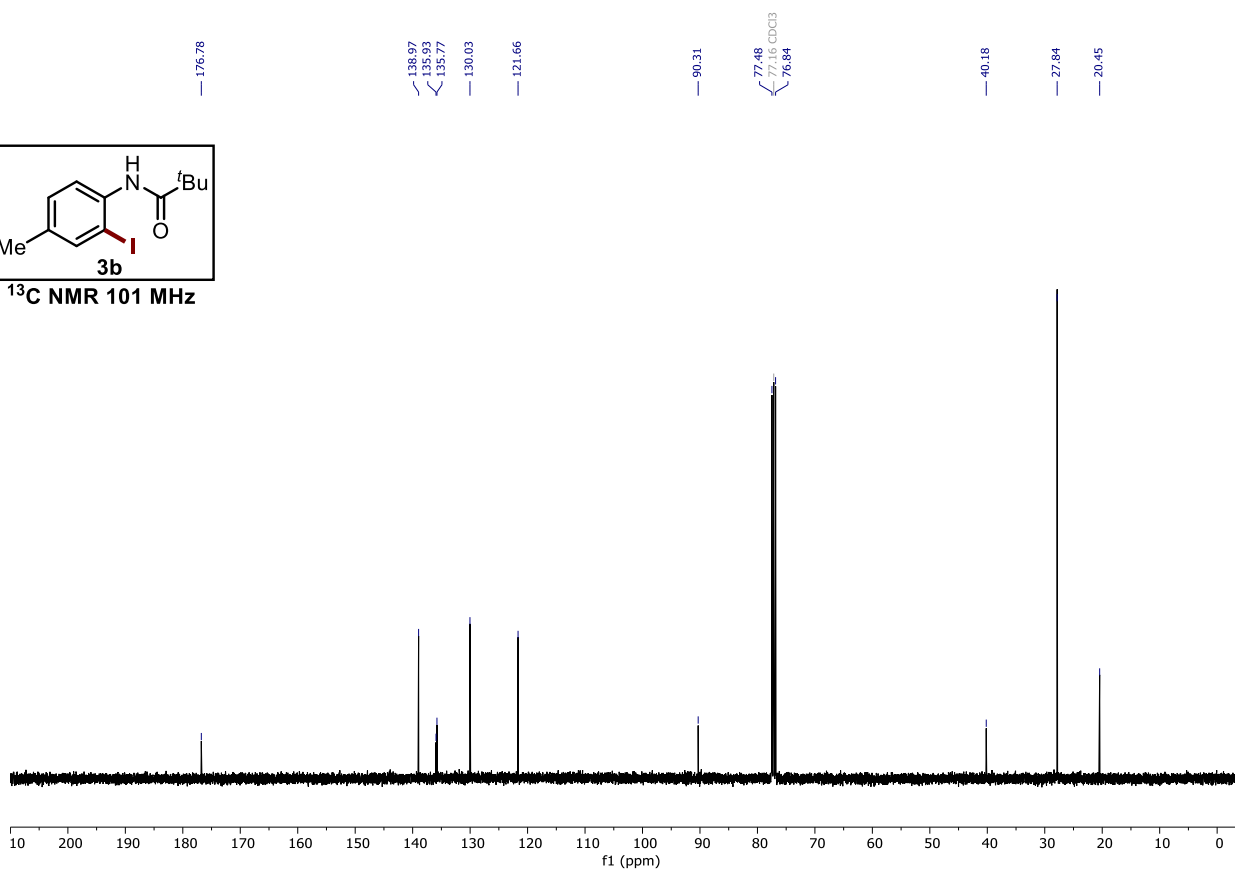

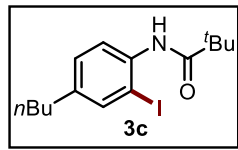

<sup>1</sup>H NMR 400 MHz

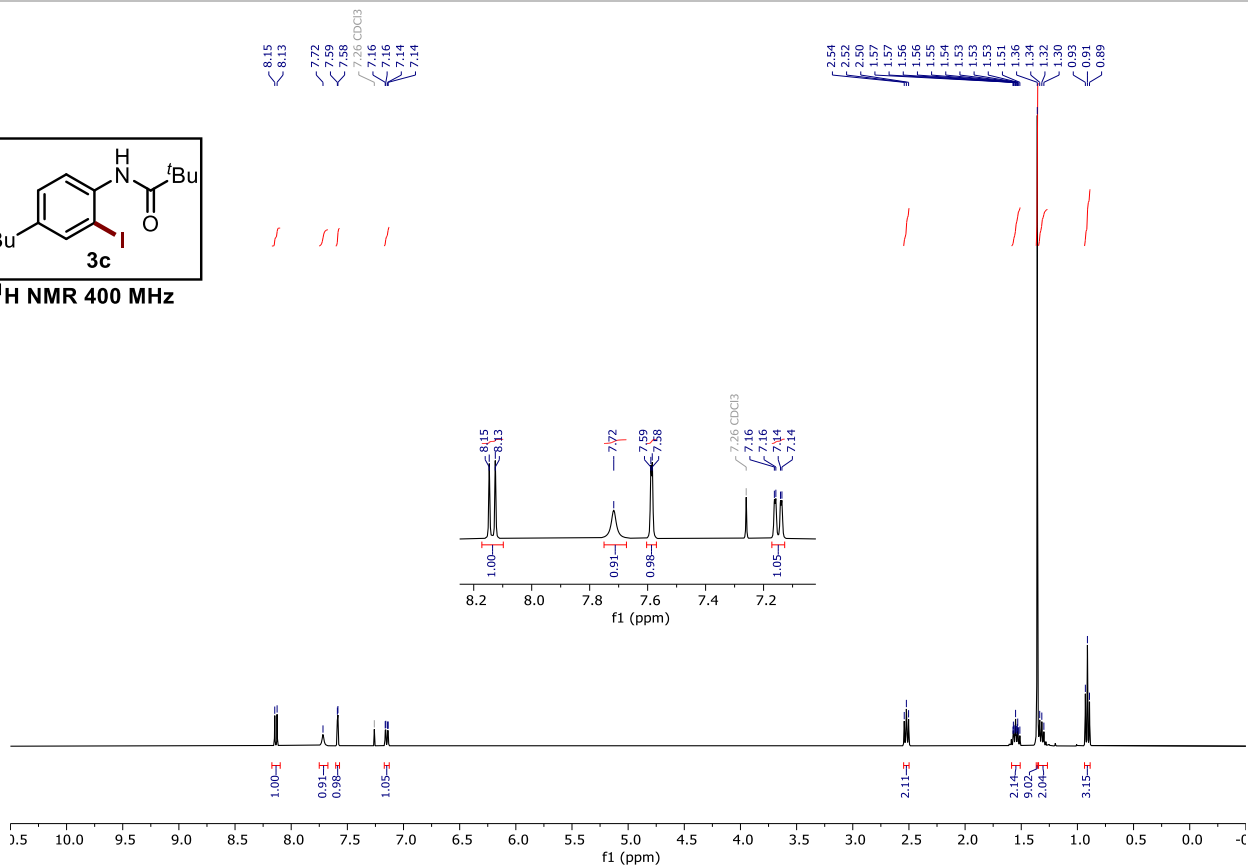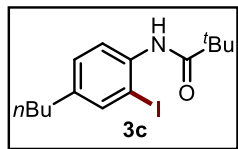

<sup>13</sup>C NMR 101 MHz

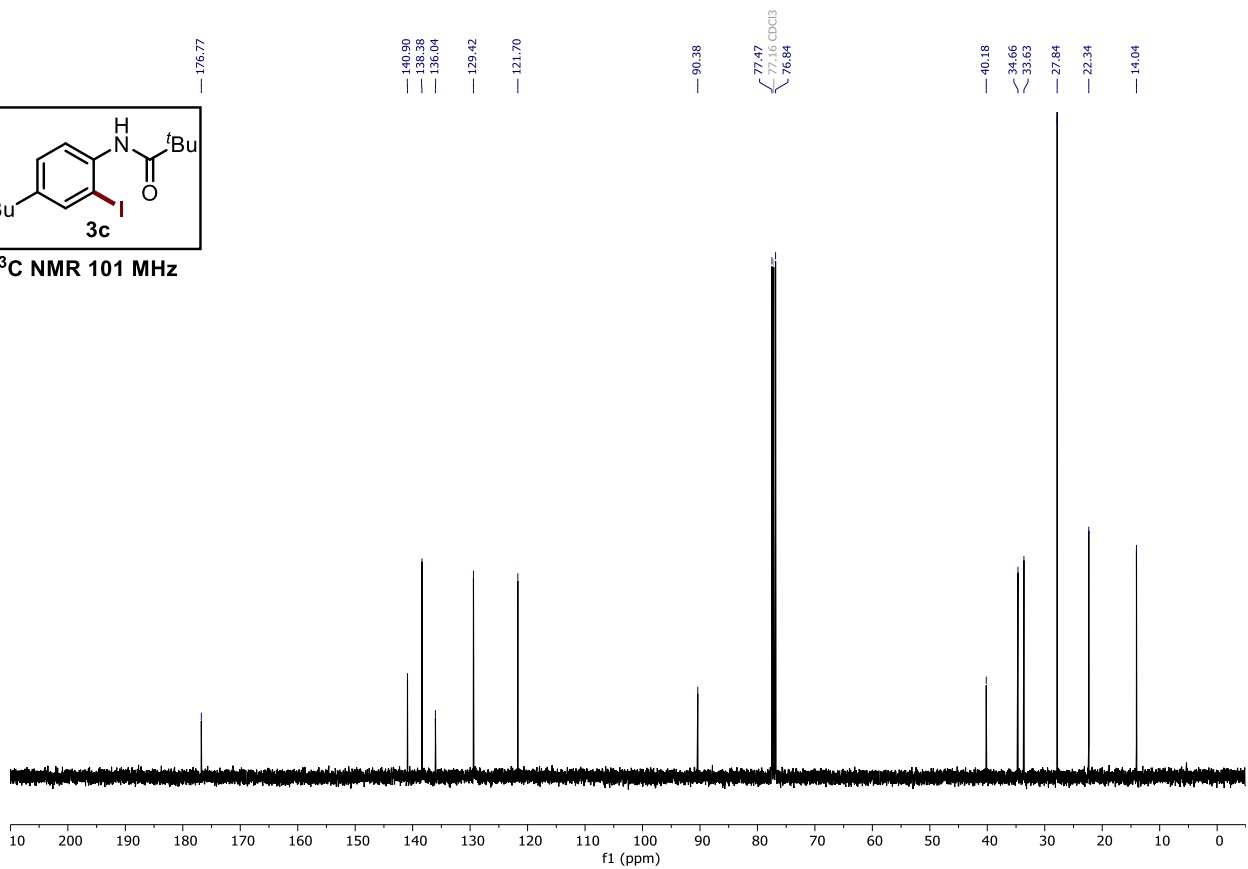

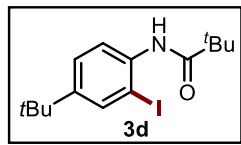

<sup>1</sup>H NMR 400 MHz

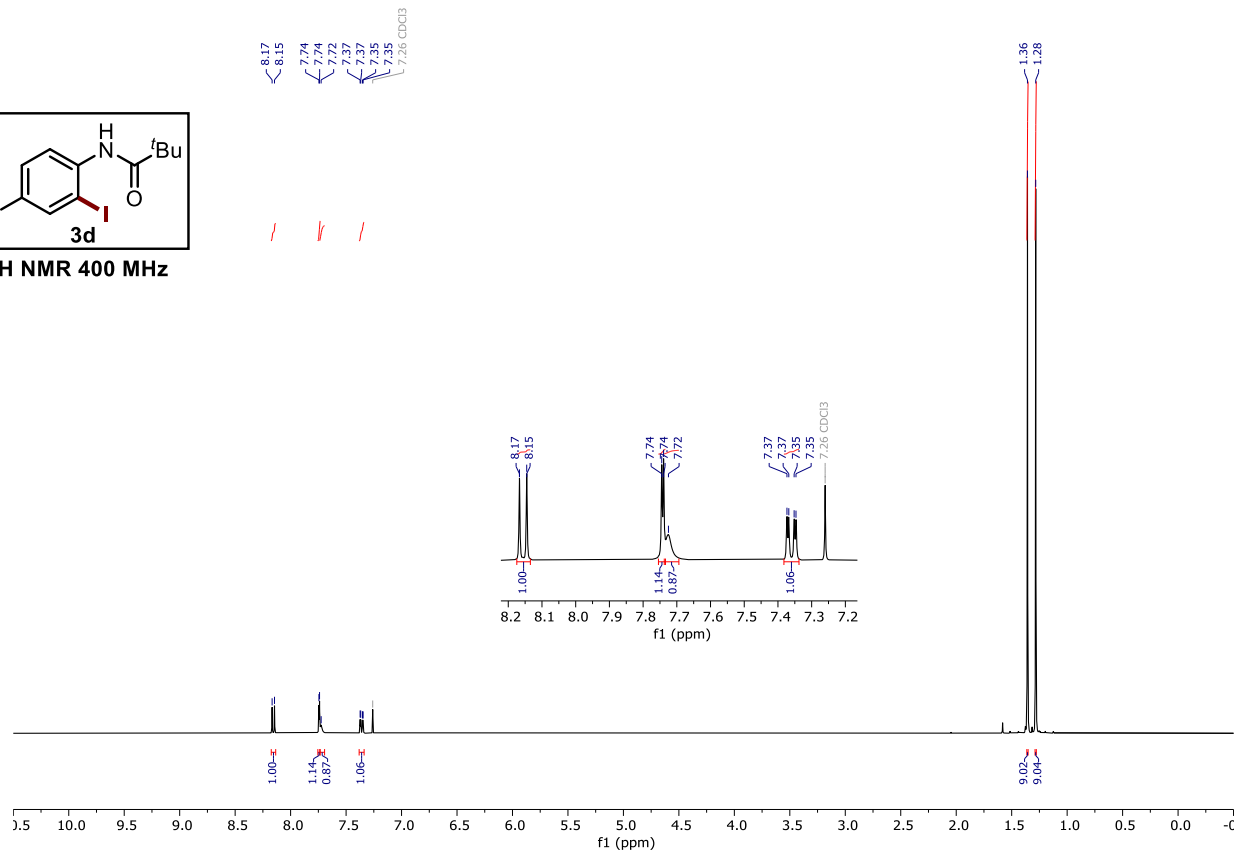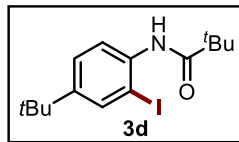

<sup>13</sup>C NMR 101 MHz

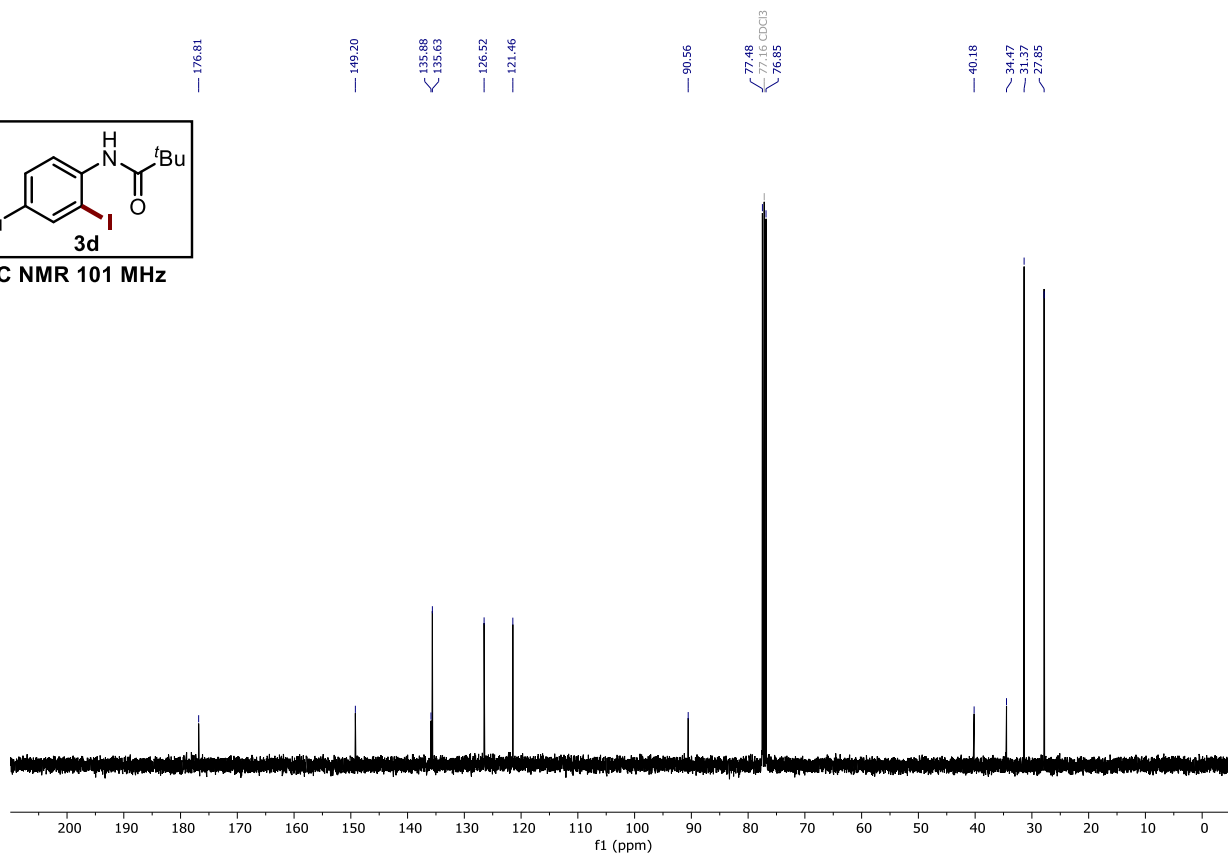

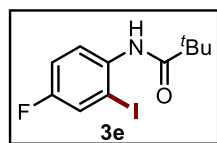

<sup>1</sup>H NMR 400 MHz

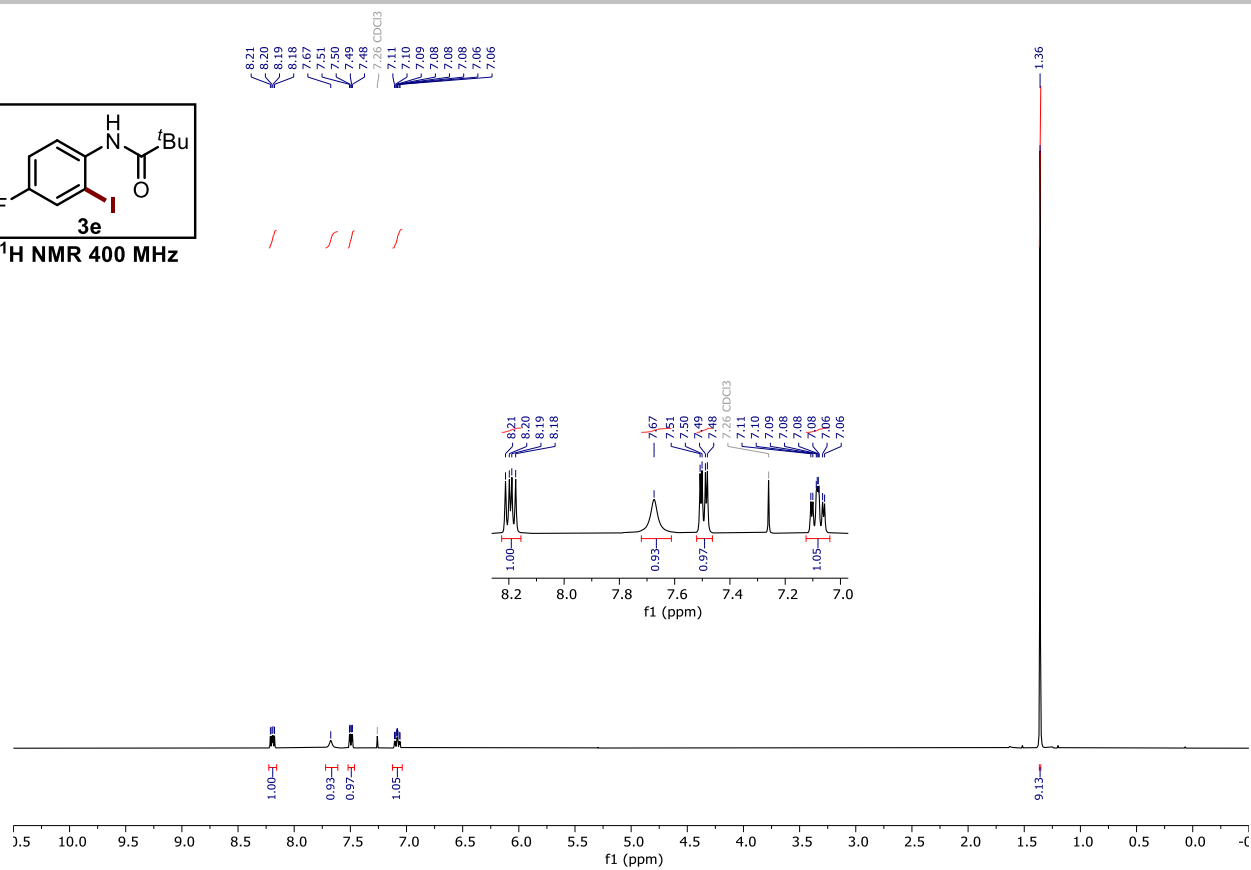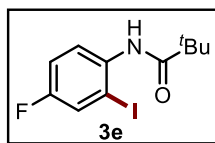

<sup>13</sup>C NMR 101 MHz

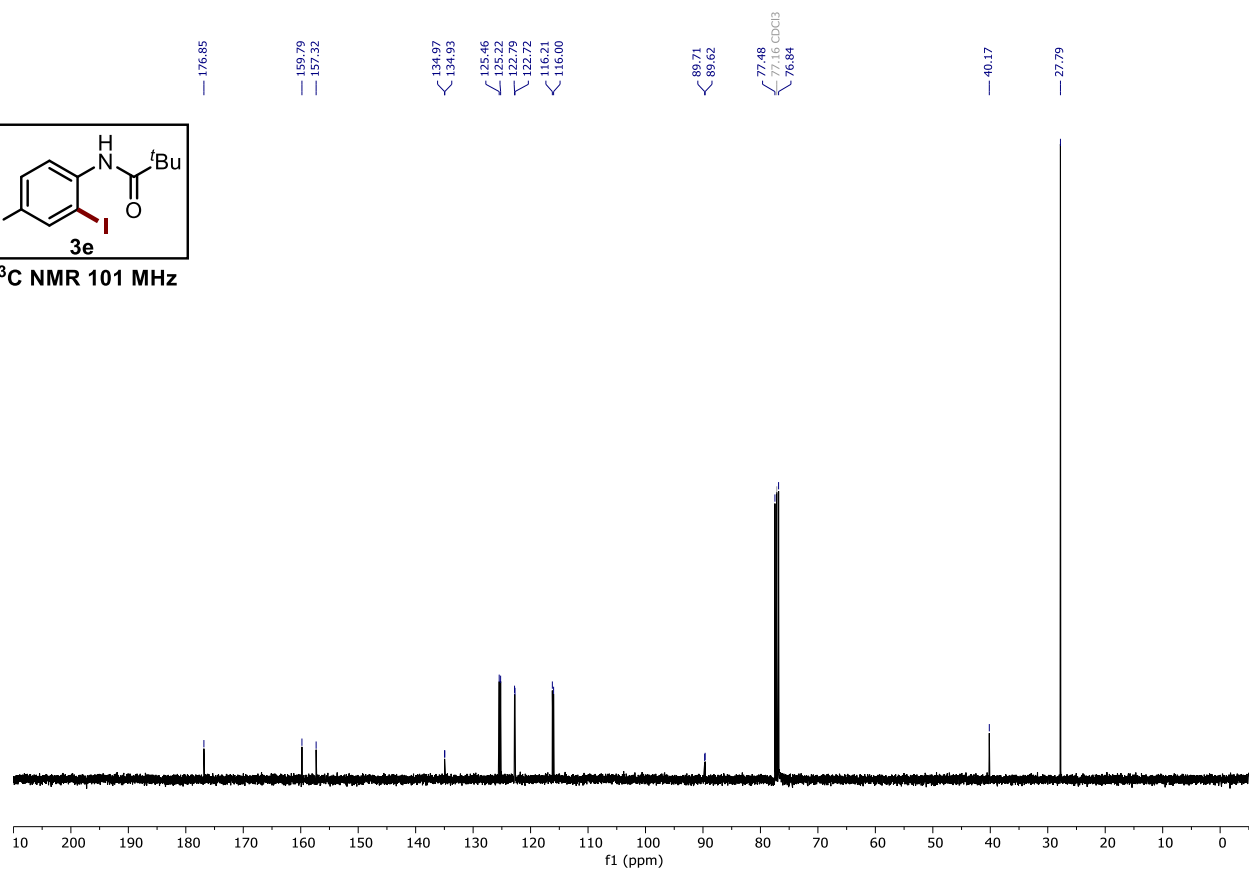

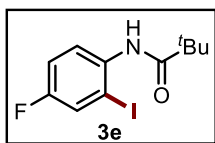

<sup>19</sup>F NMR 470 MHz

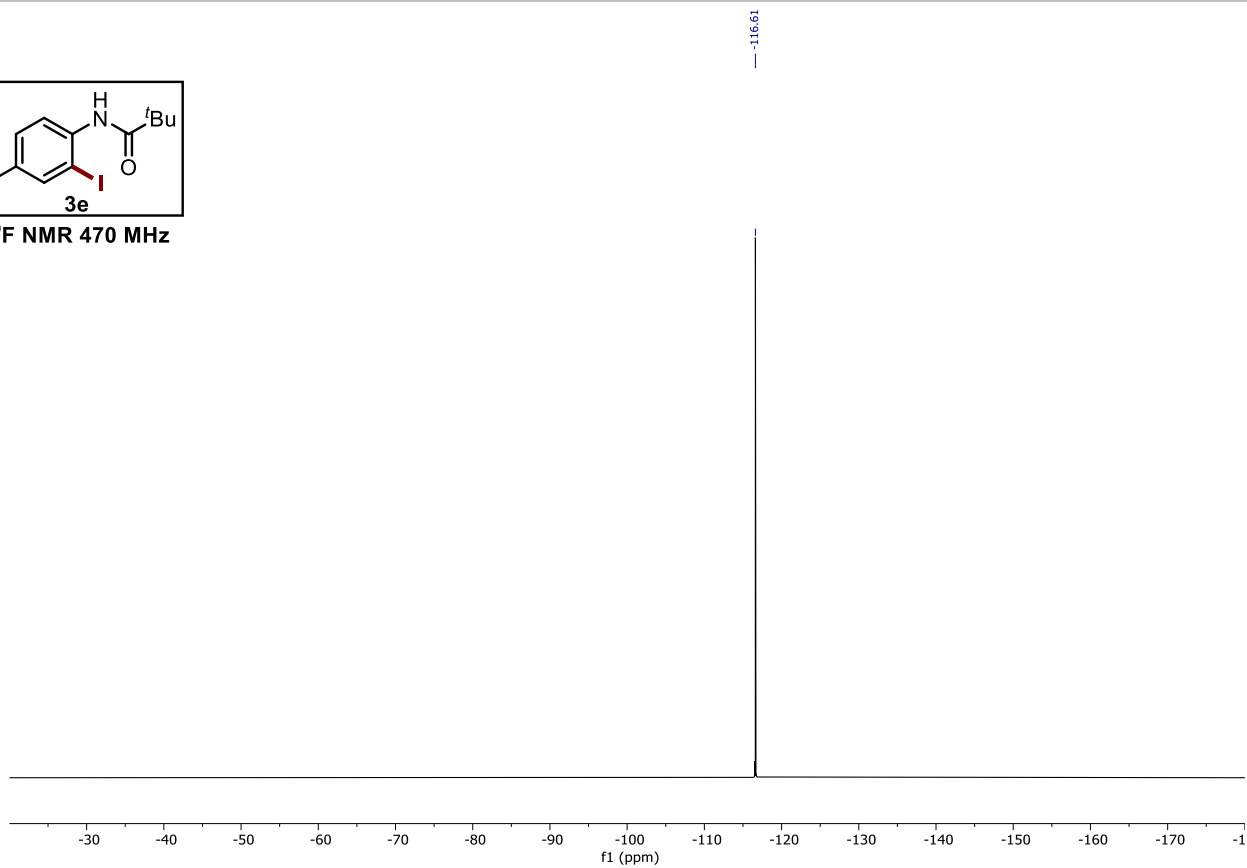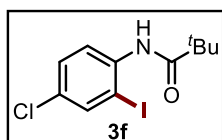

<sup>1</sup>H NMR 400 MHz

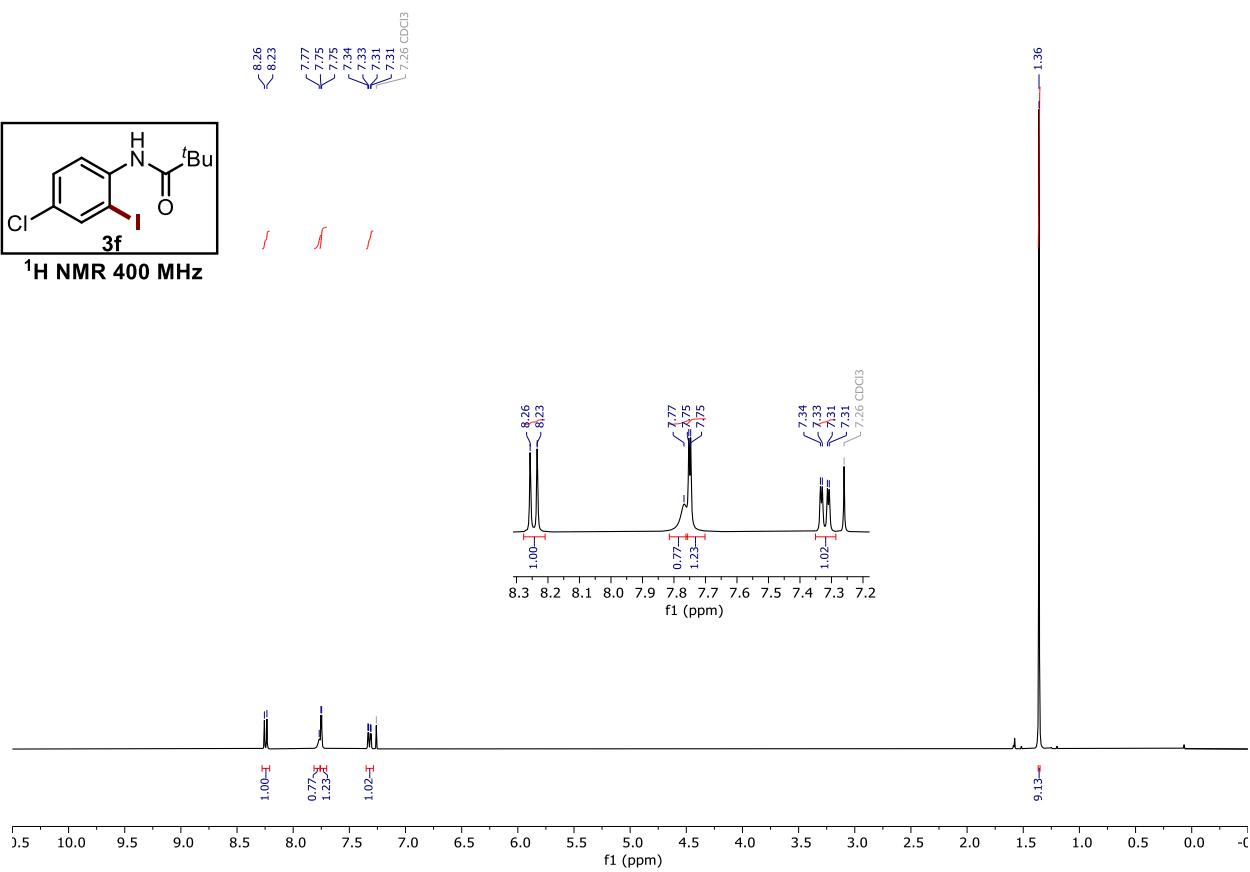

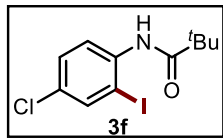

<sup>13</sup>C NMR 101 MHz

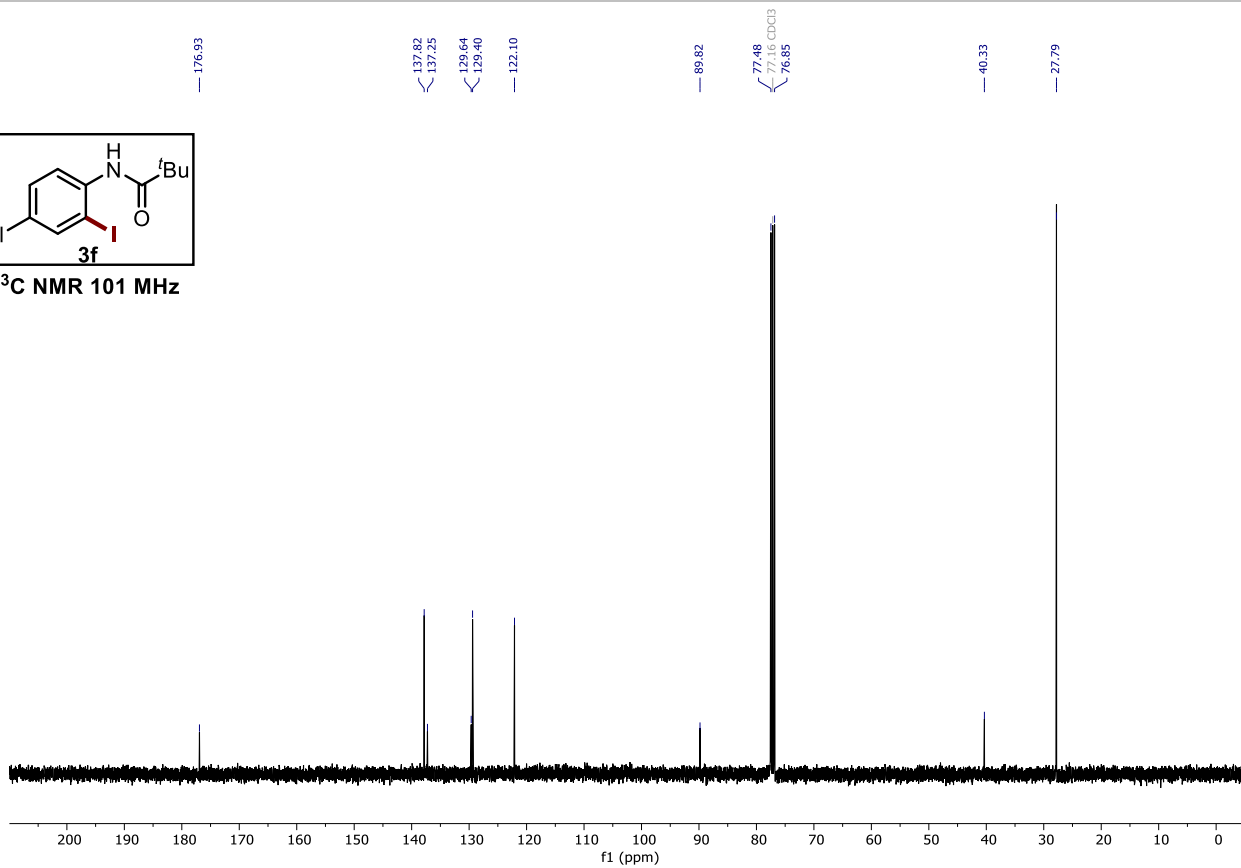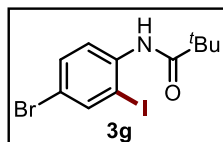

<sup>1</sup>H NMR 400 MHz

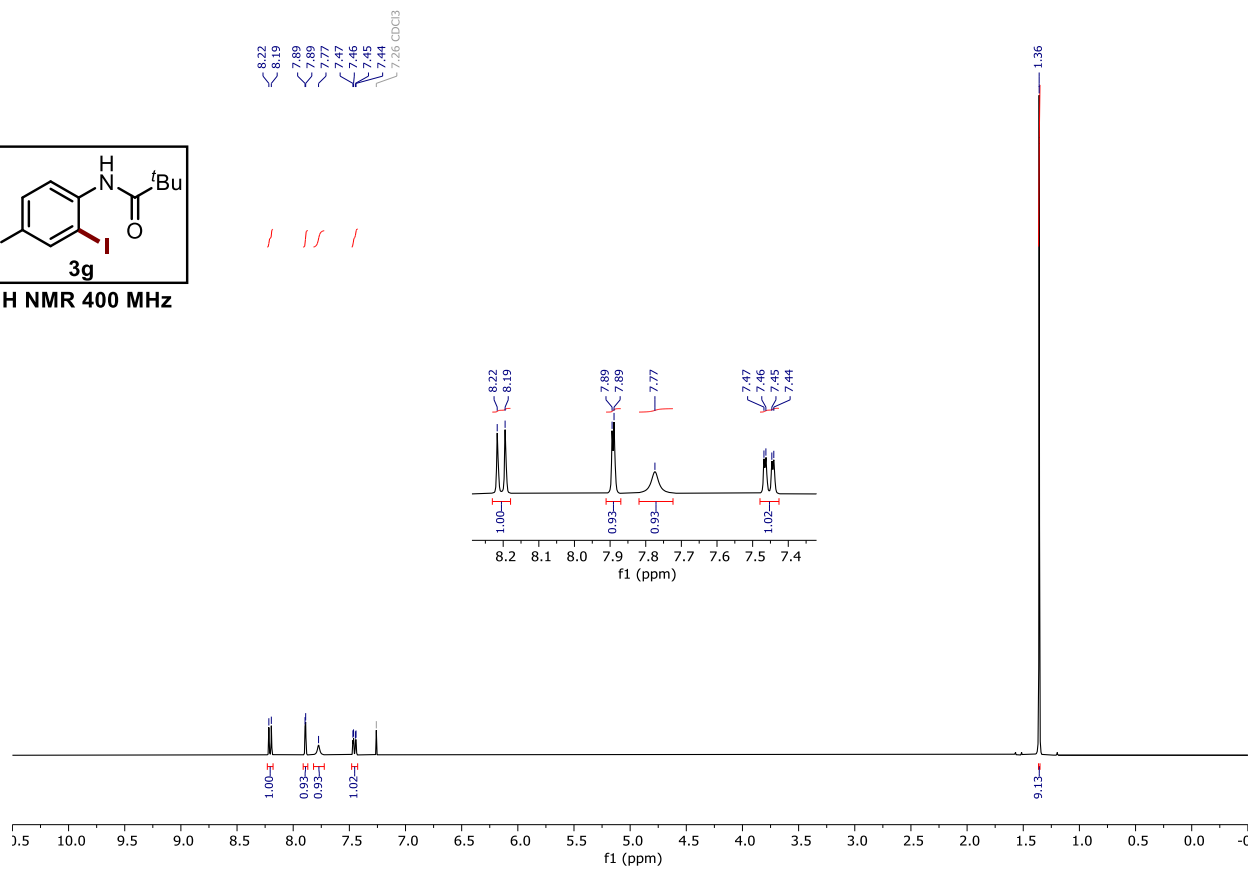

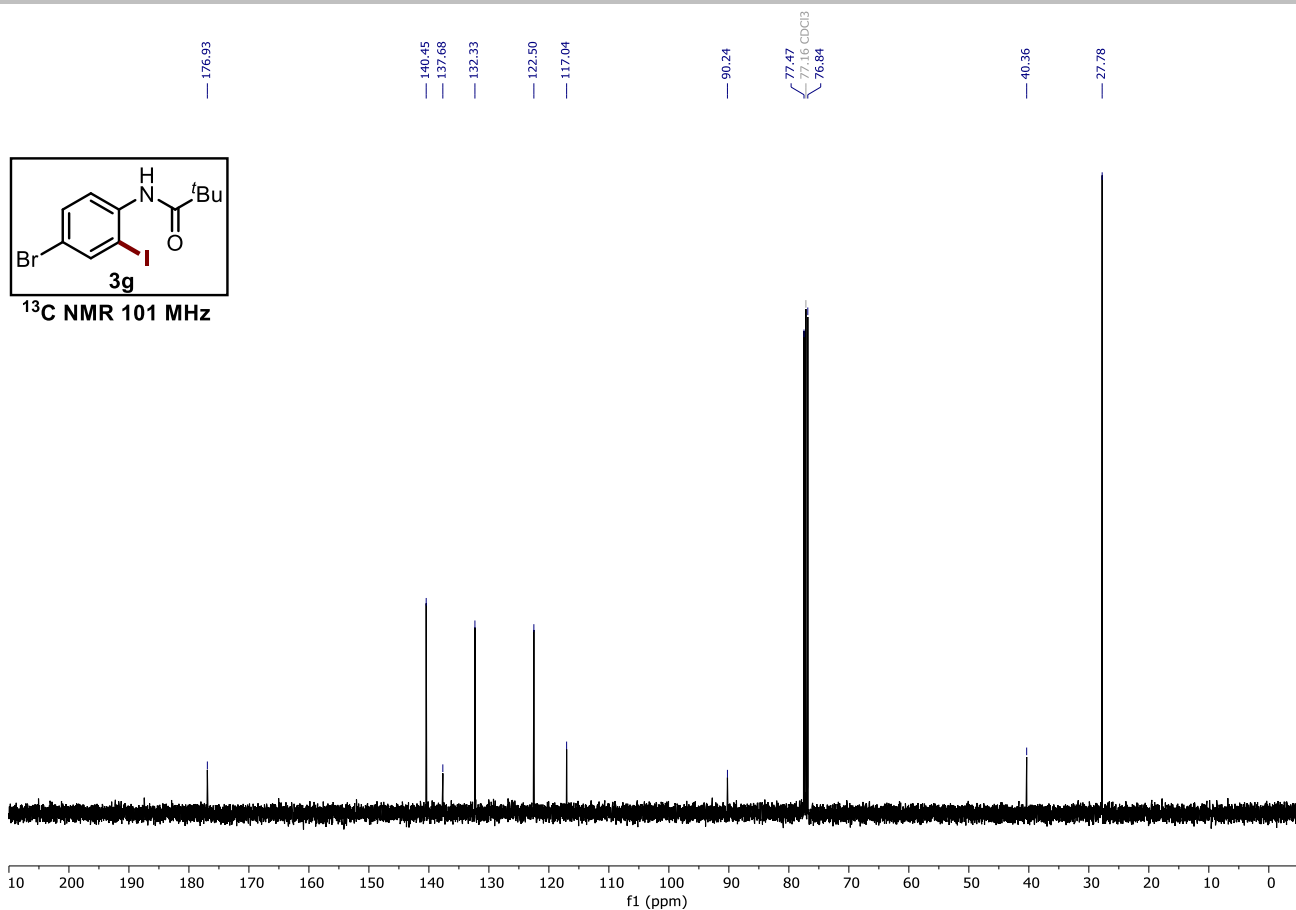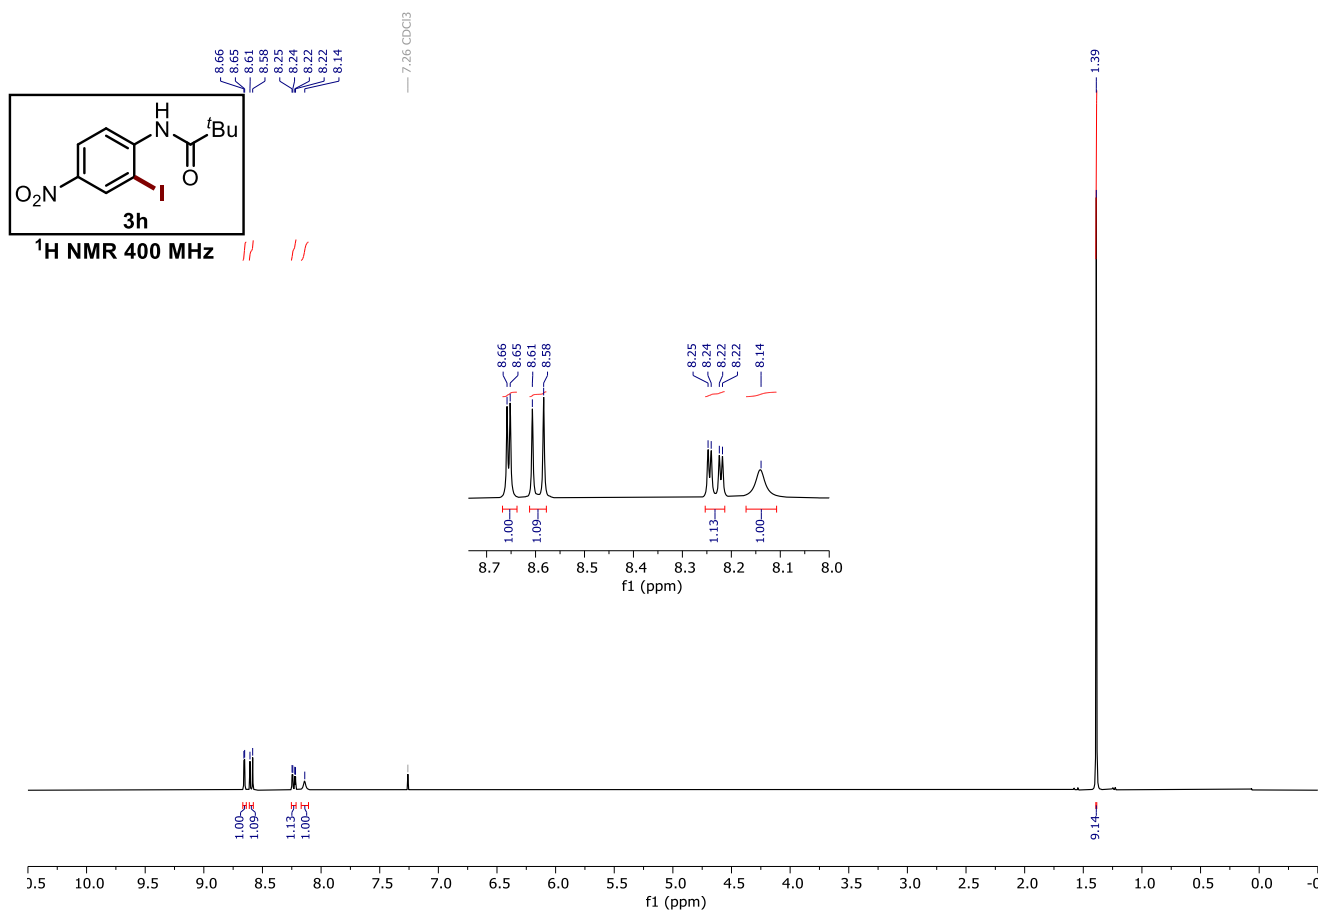

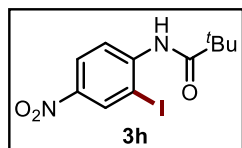

<sup>13</sup>C NMR 101 MHz

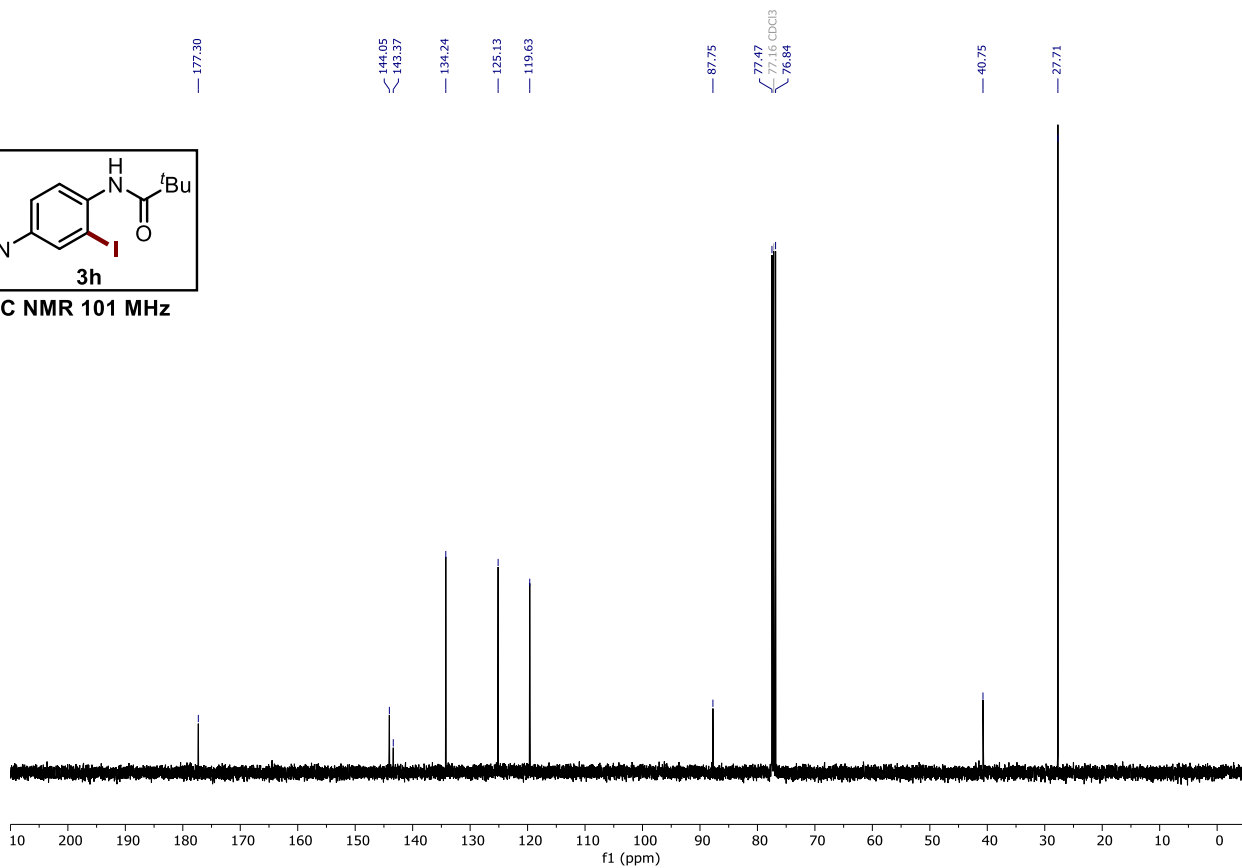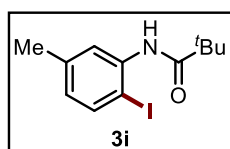

<sup>1</sup>H NMR 400 MHz

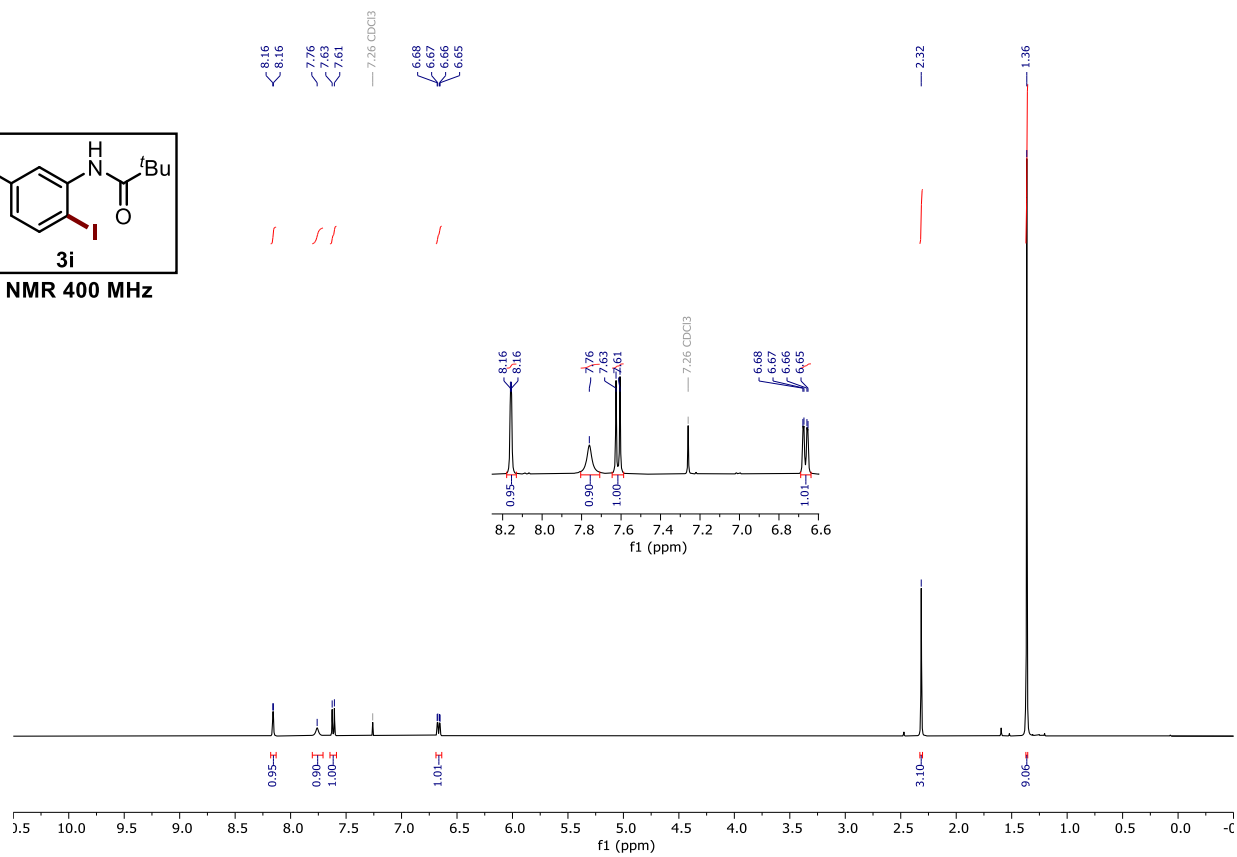



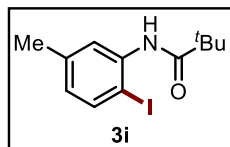

<sup>13</sup>C NMR 101 MHz

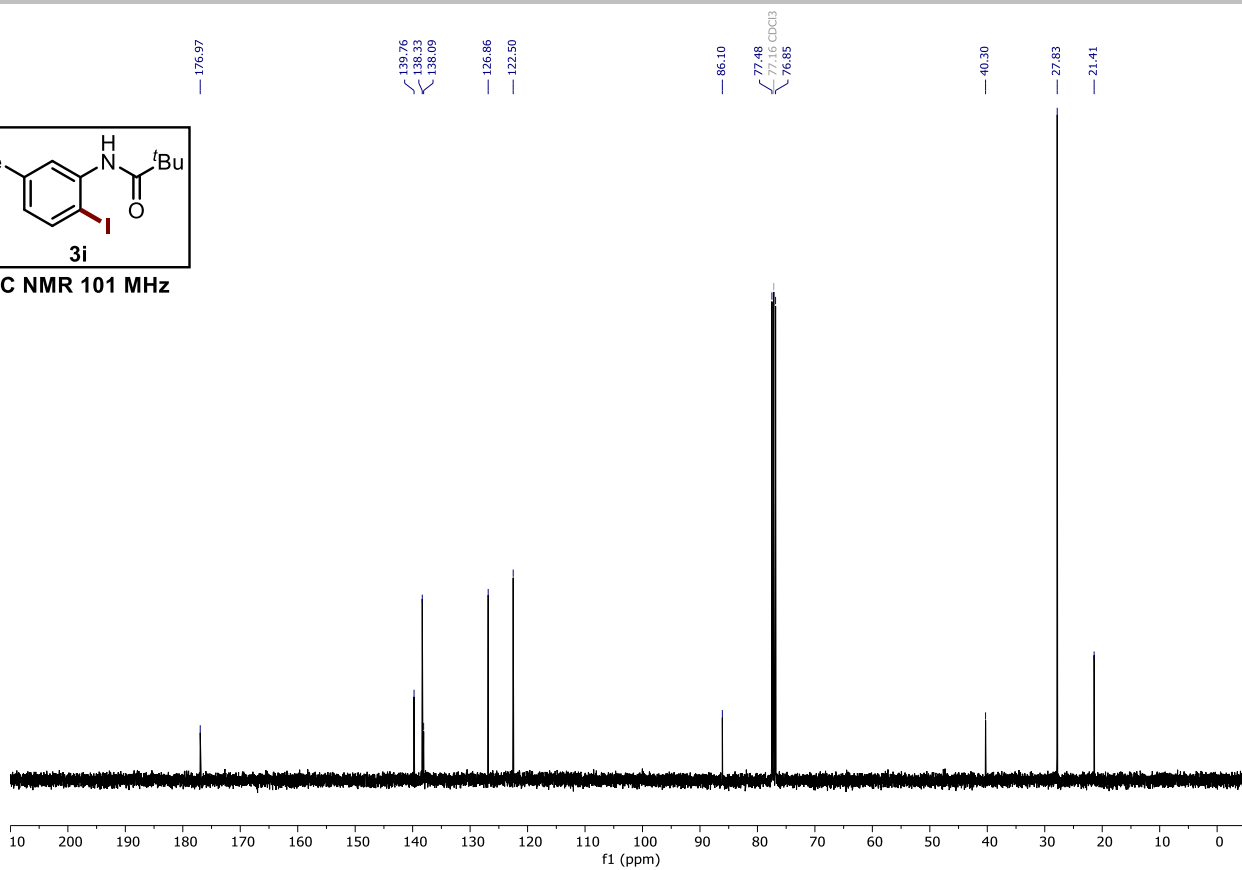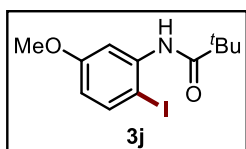

<sup>1</sup>H NMR 400 MHz

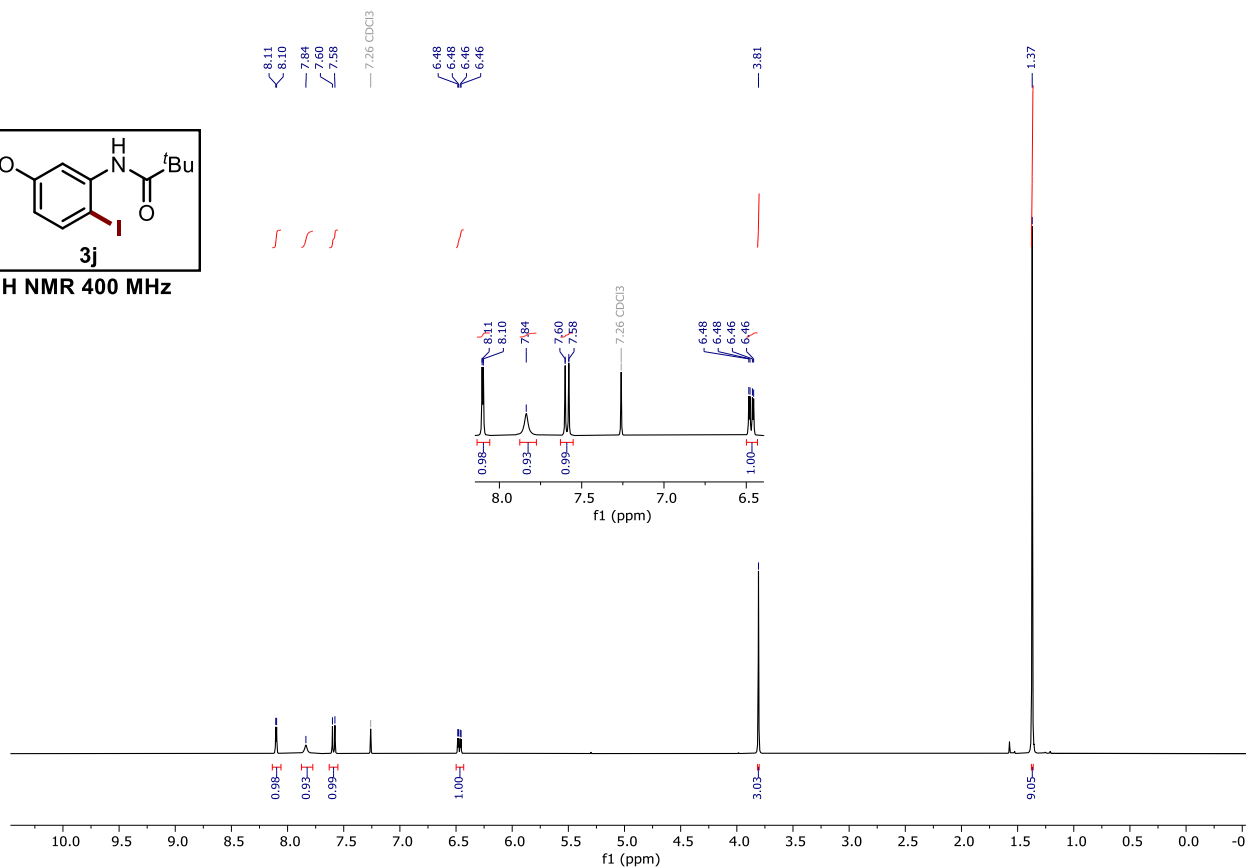

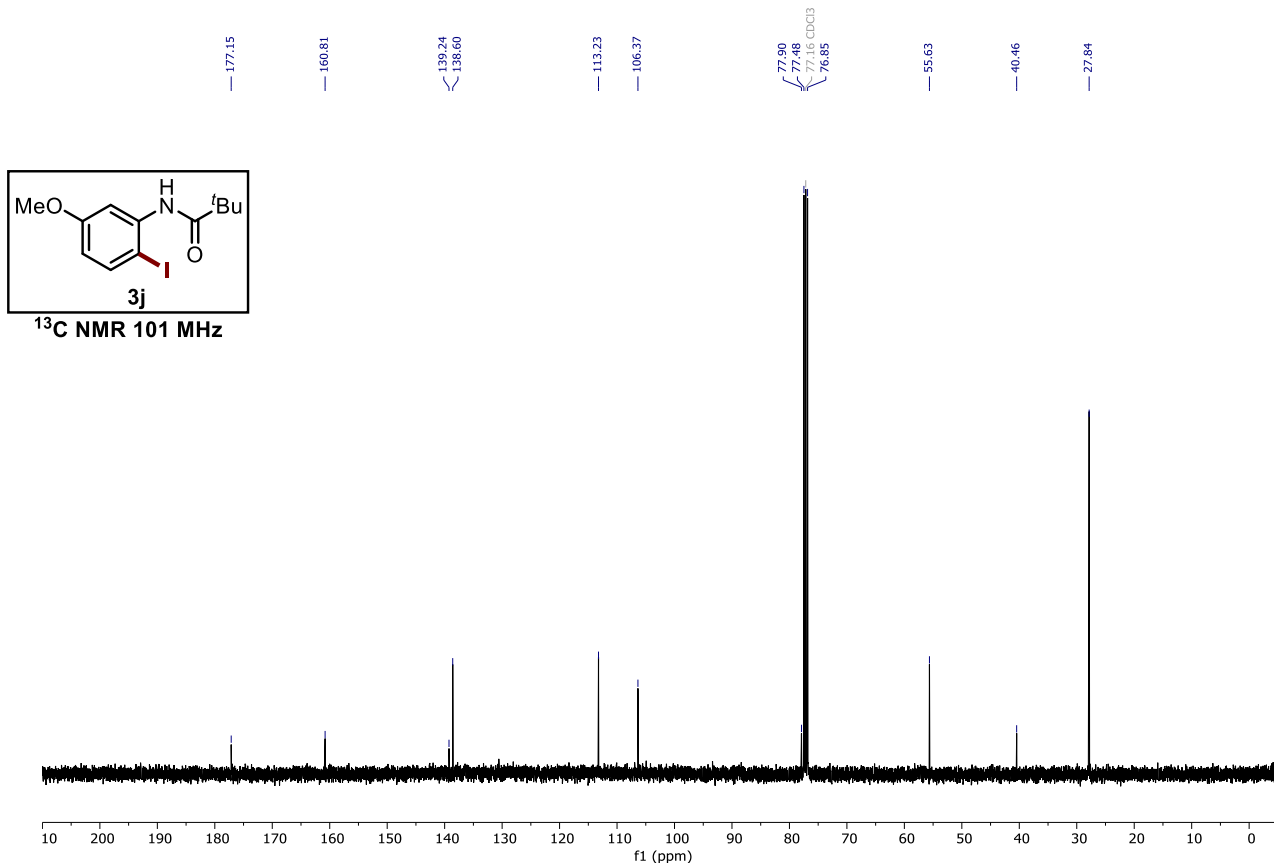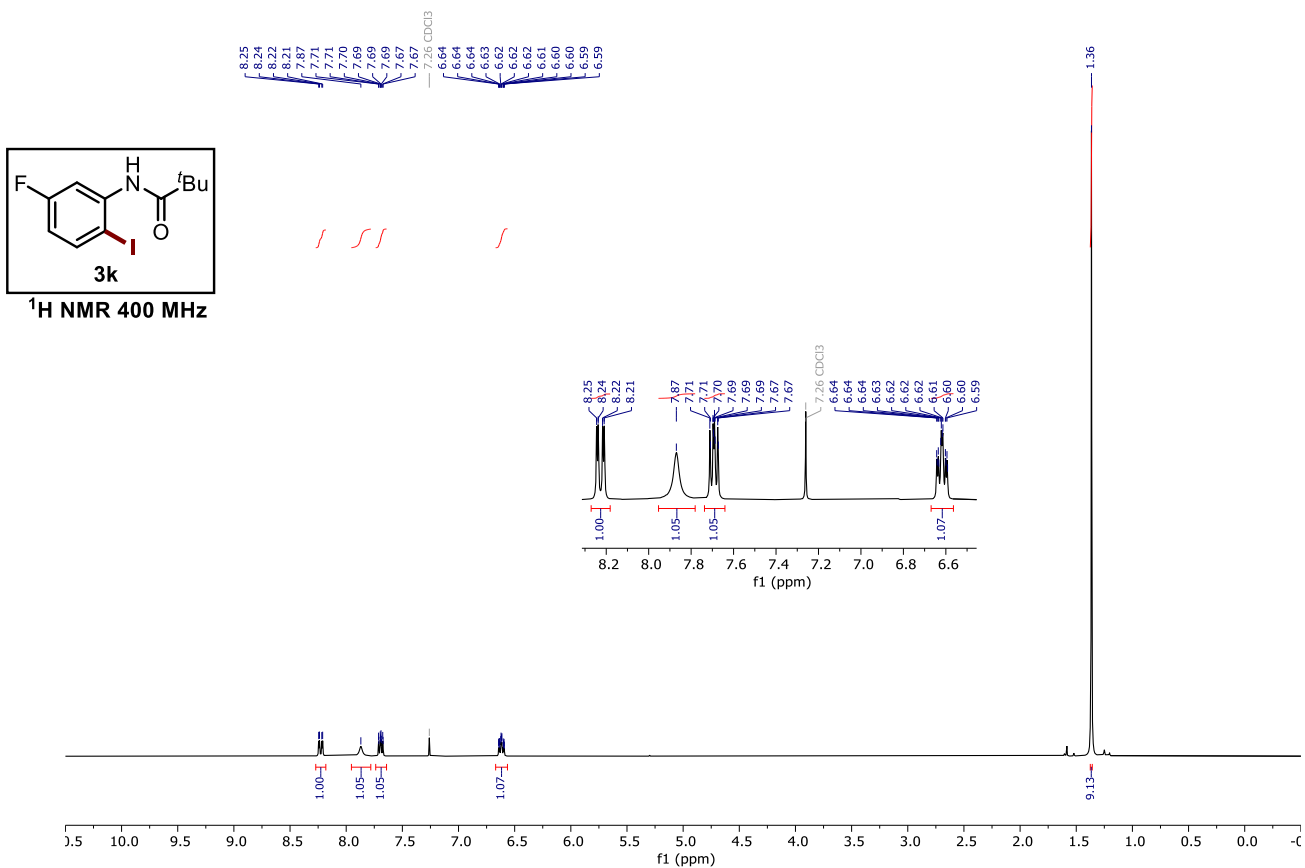

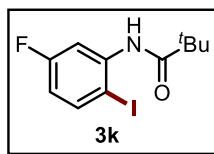

<sup>13</sup>C NMR 101 MHz

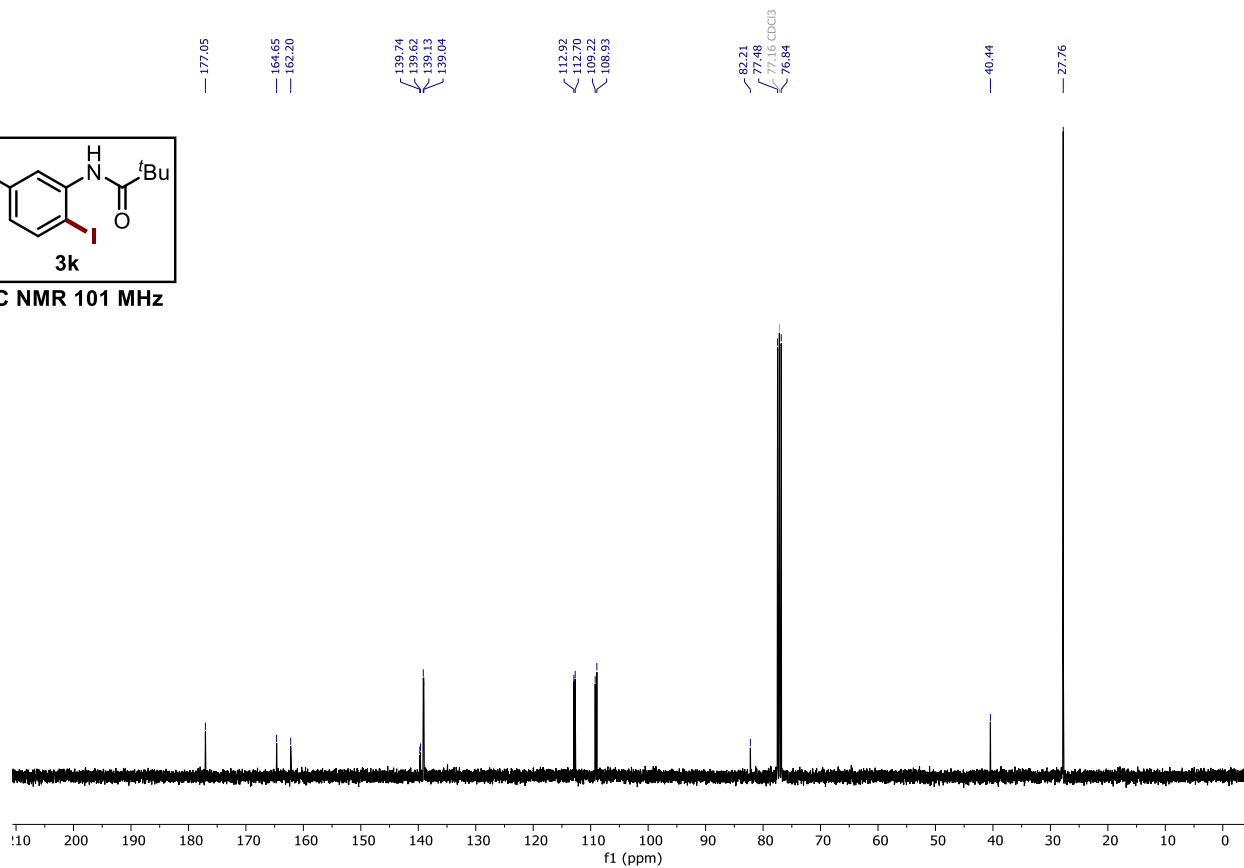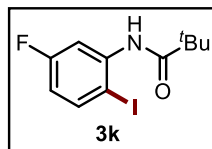

<sup>19</sup>F NMR 470 MHz

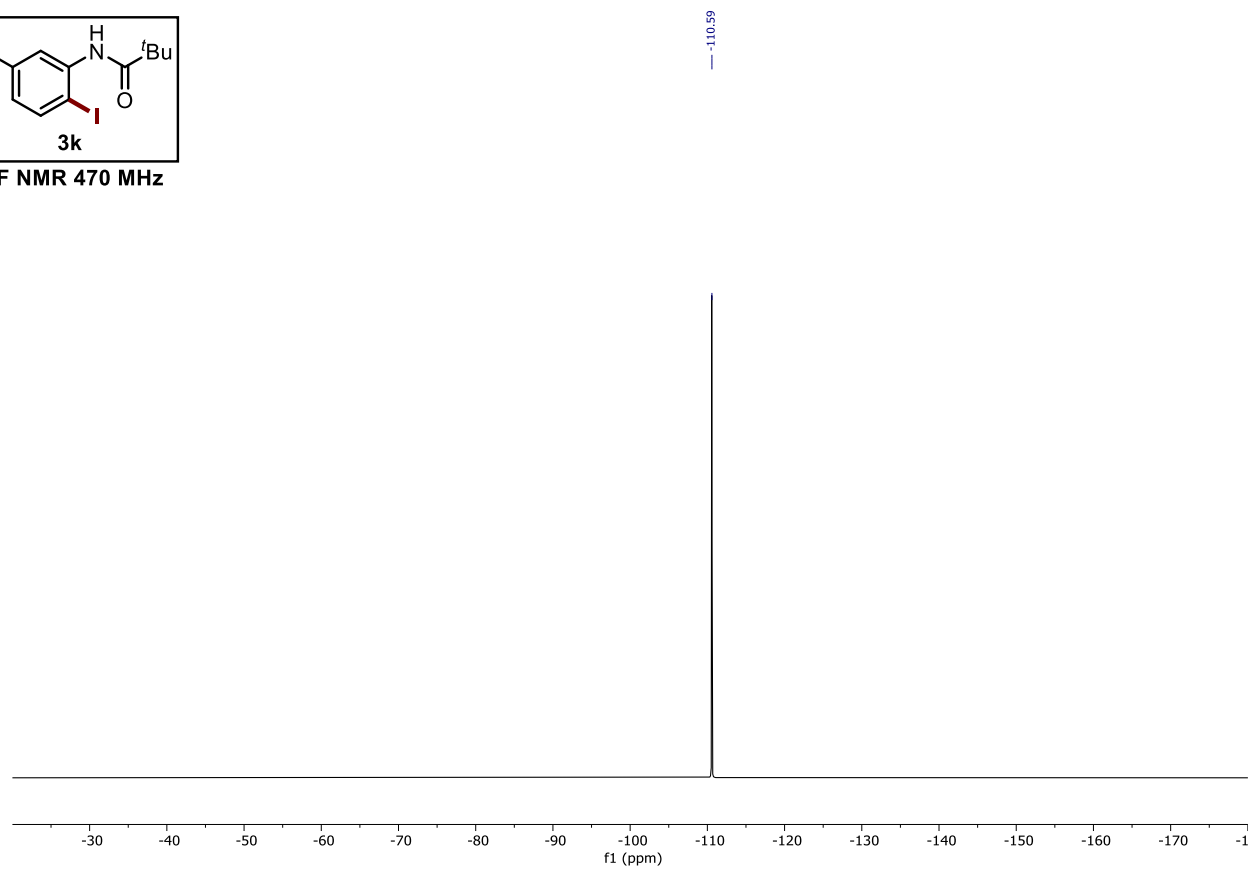

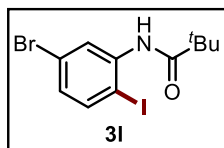

<sup>1</sup>H NMR 400 MHz

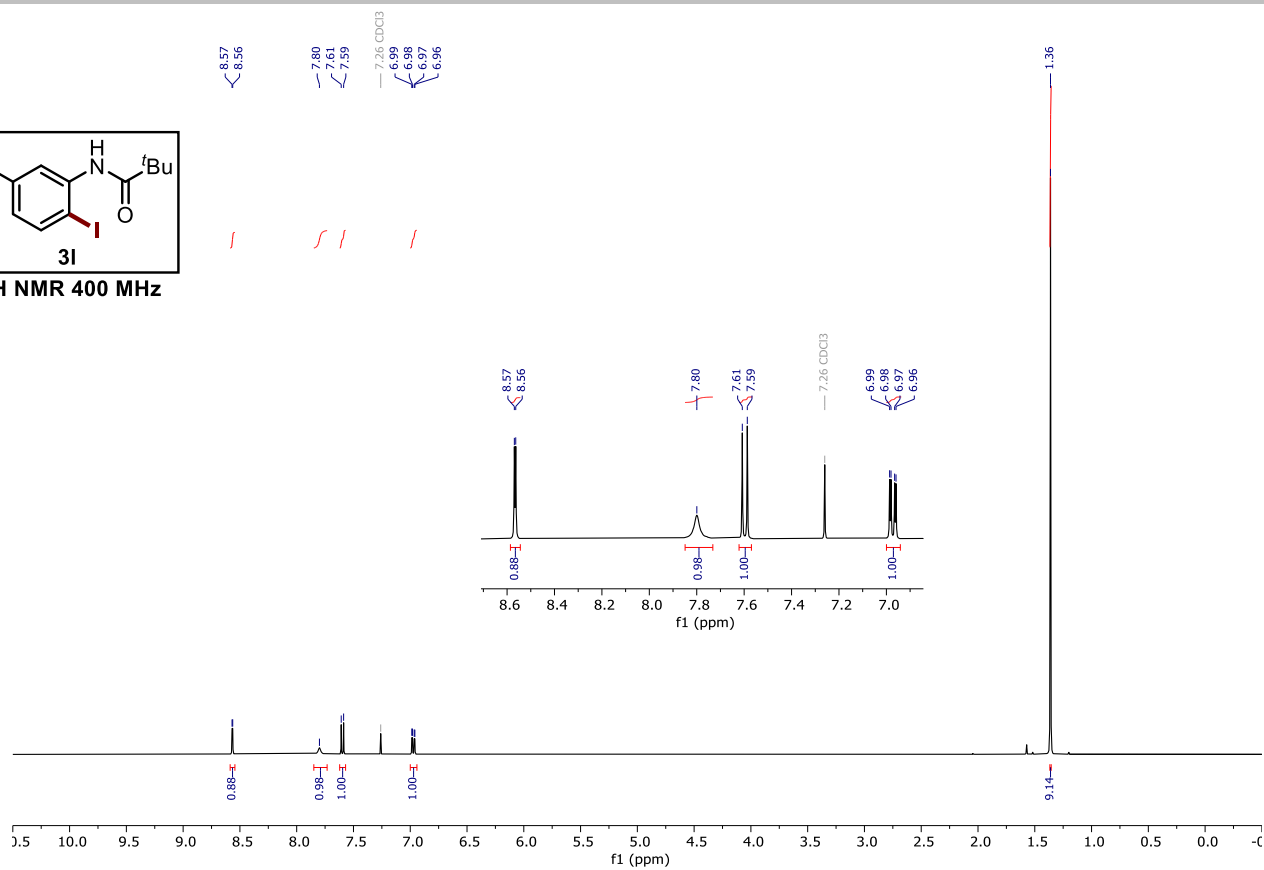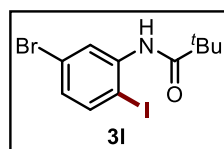

<sup>13</sup>C NMR 101 MHz

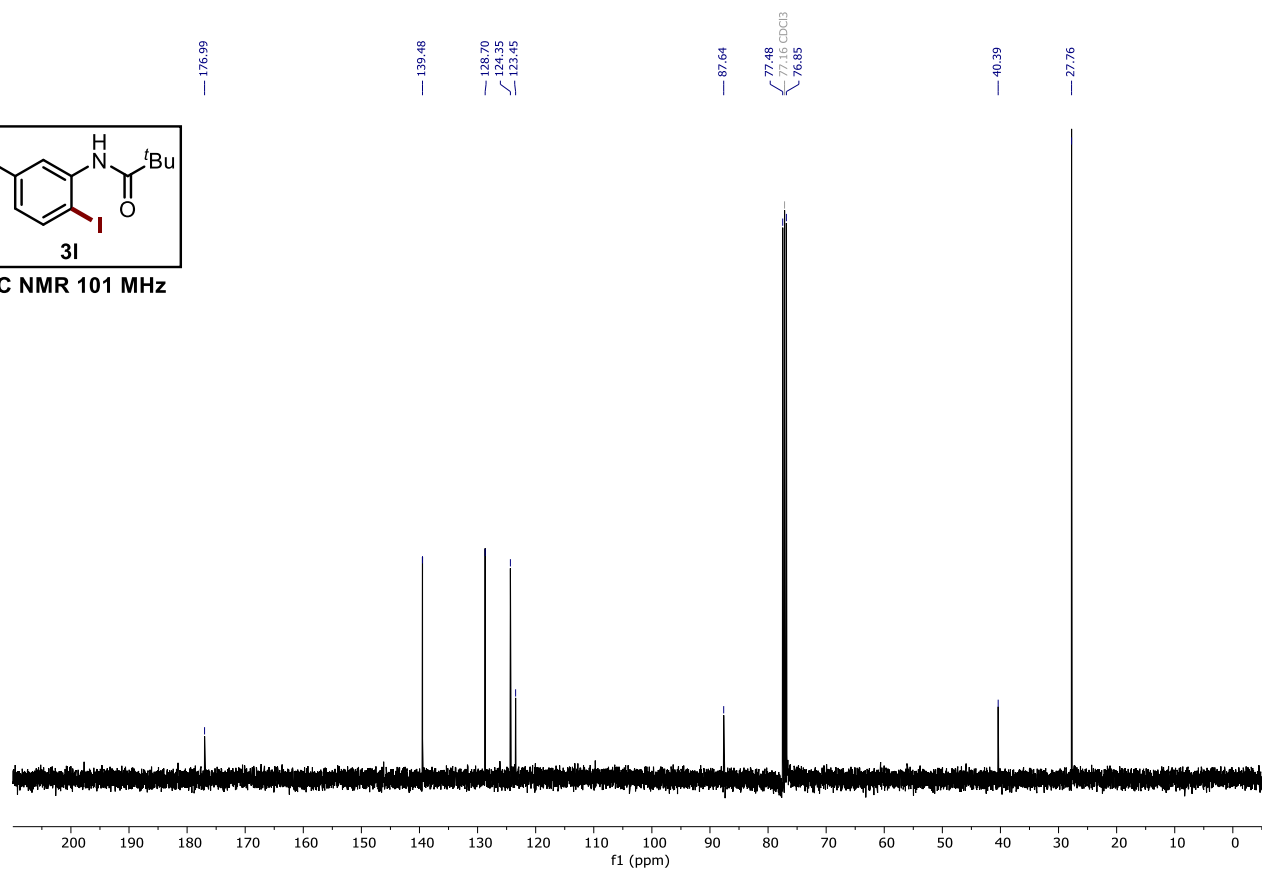

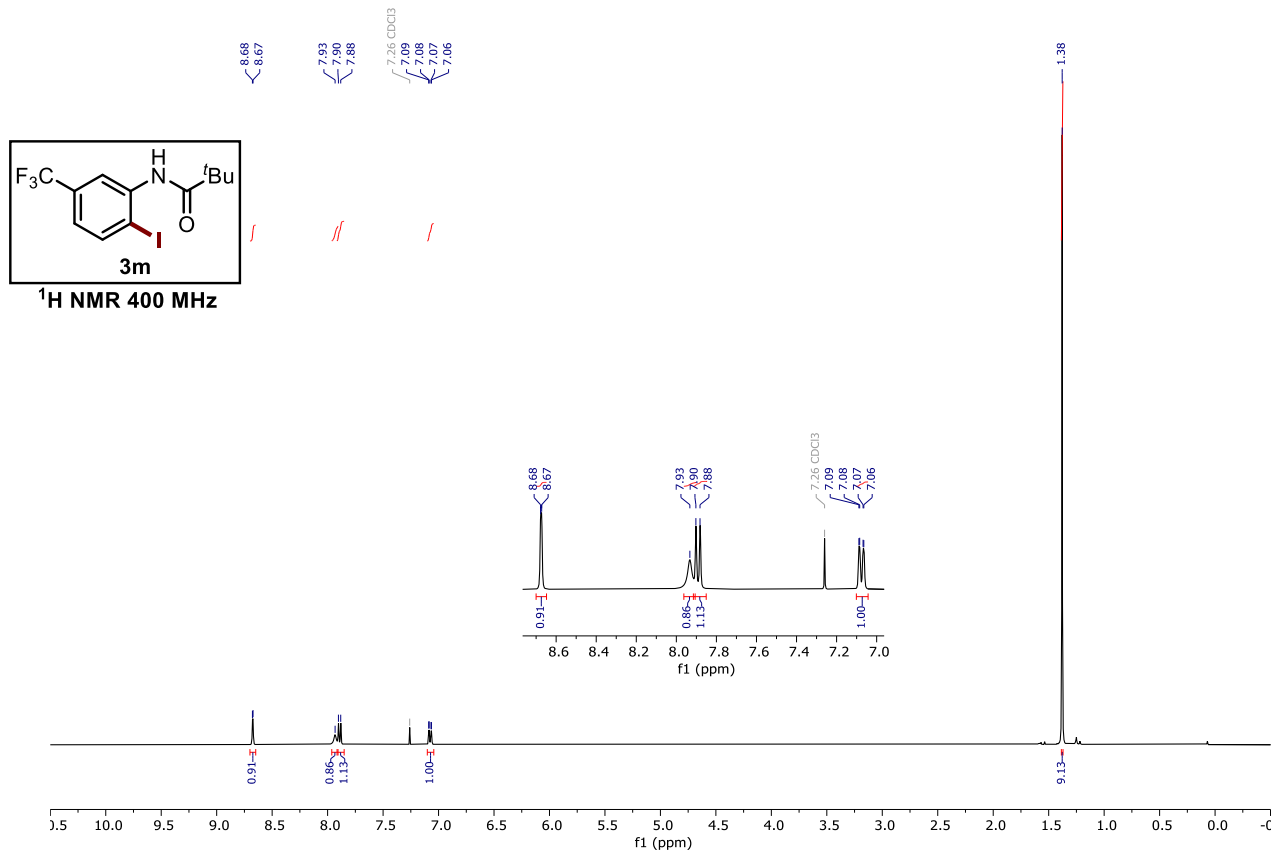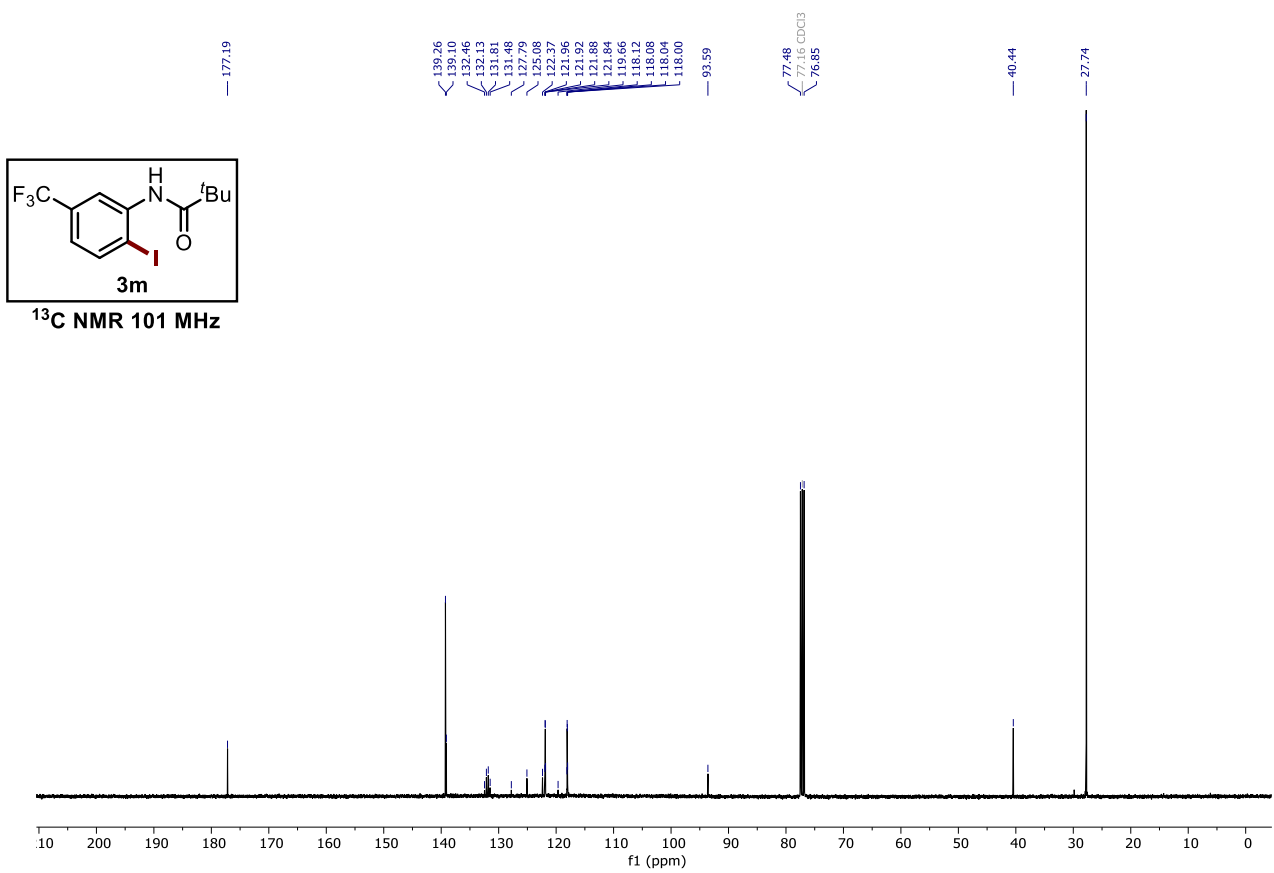

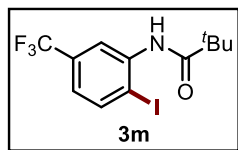

<sup>19</sup>F NMR 470 MHz

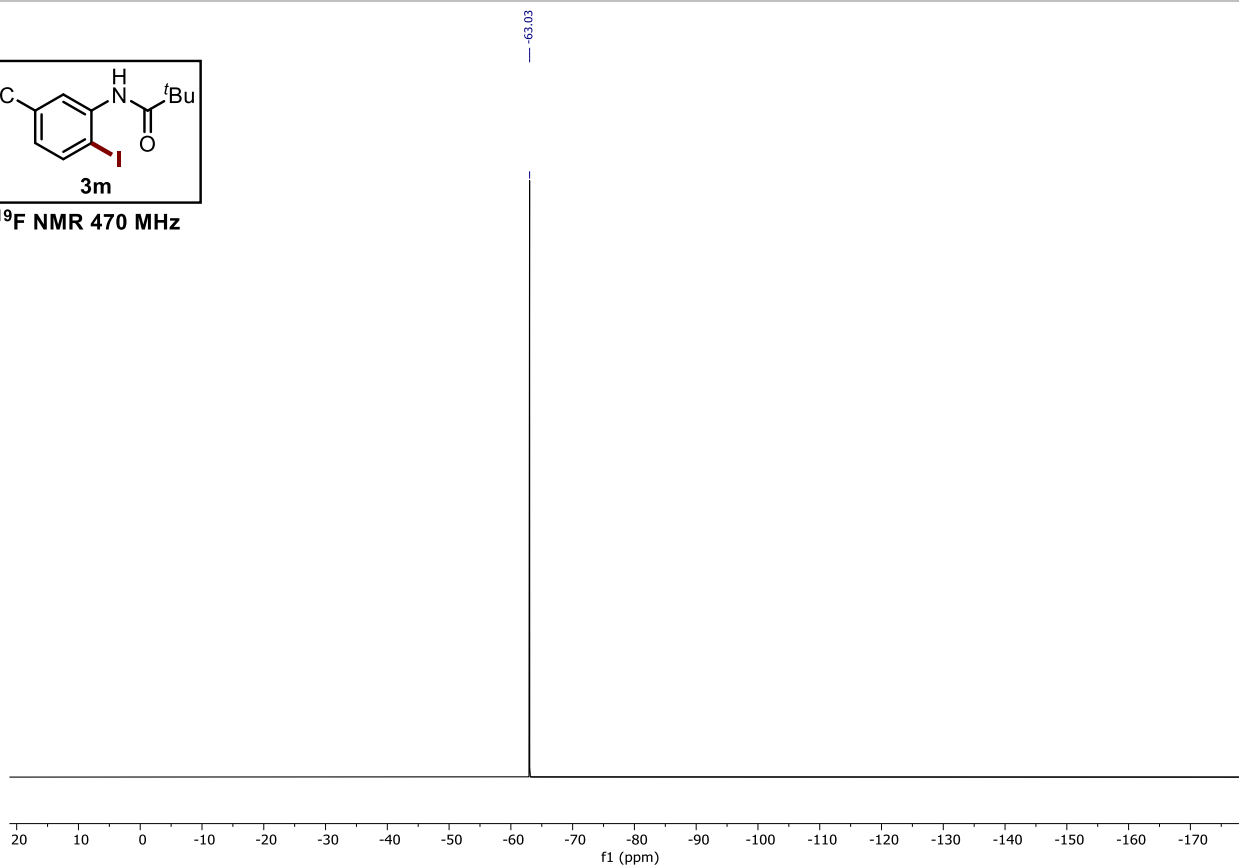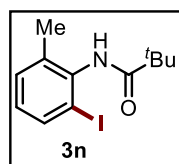

<sup>1</sup>H NMR 400 MHz

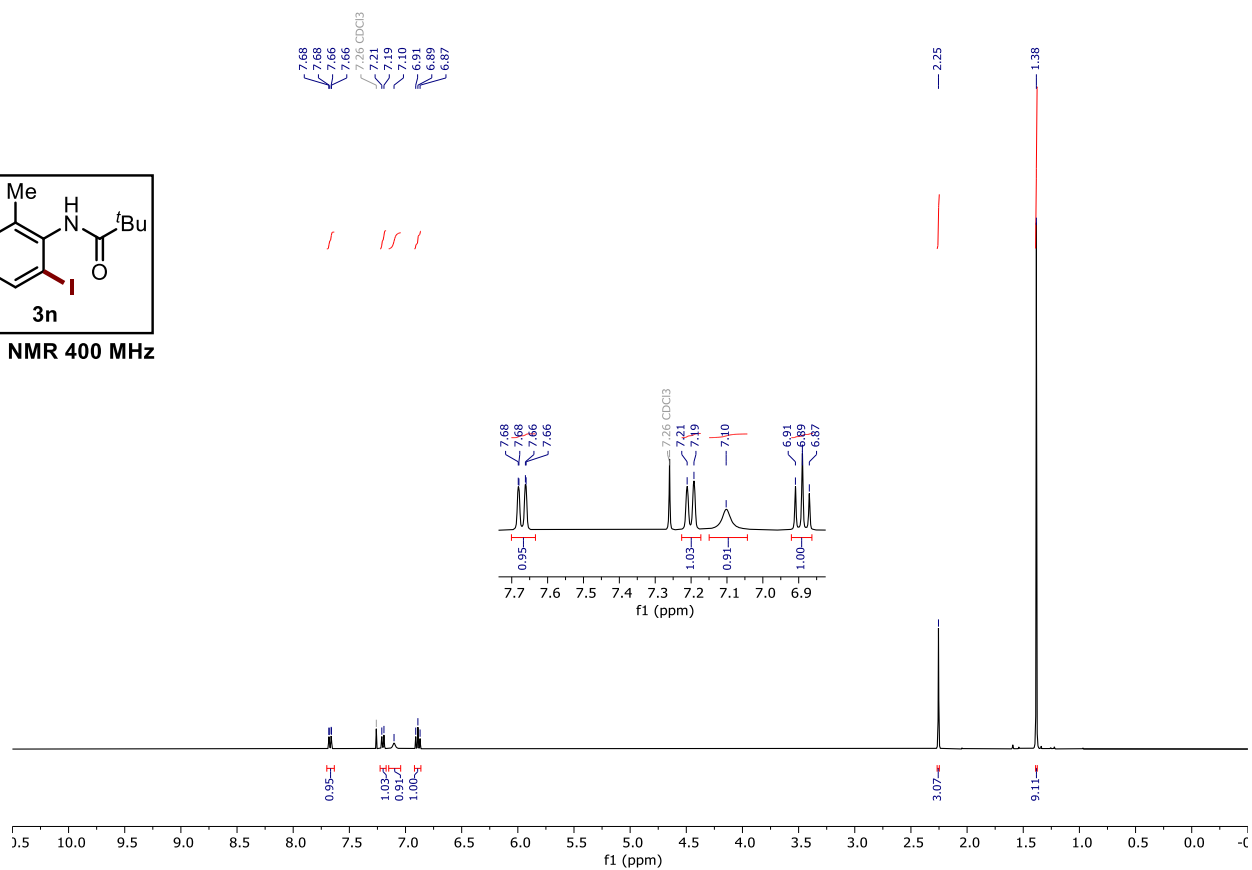

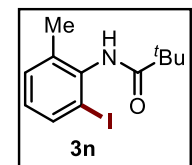

<sup>13</sup>C NMR 101 MHz

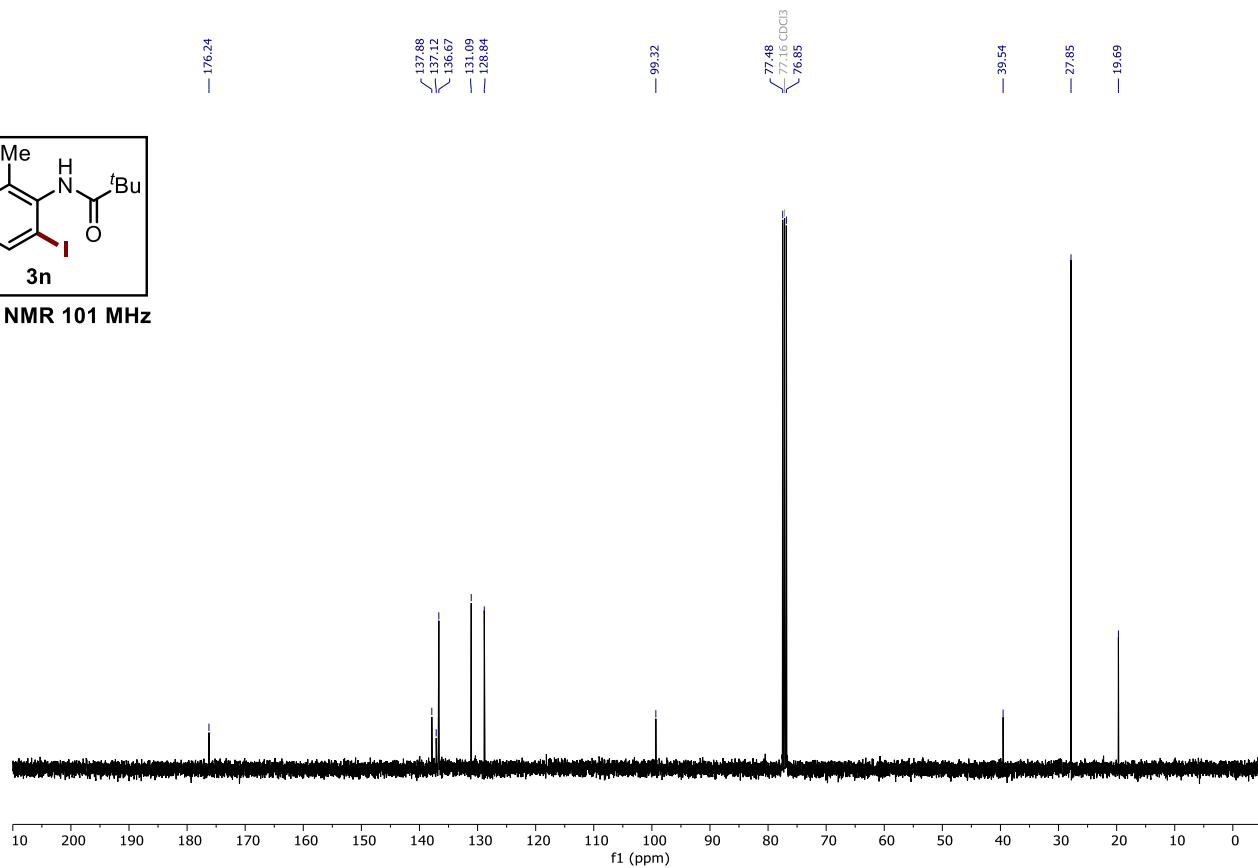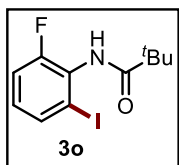

<sup>1</sup>H NMR 400 MHz

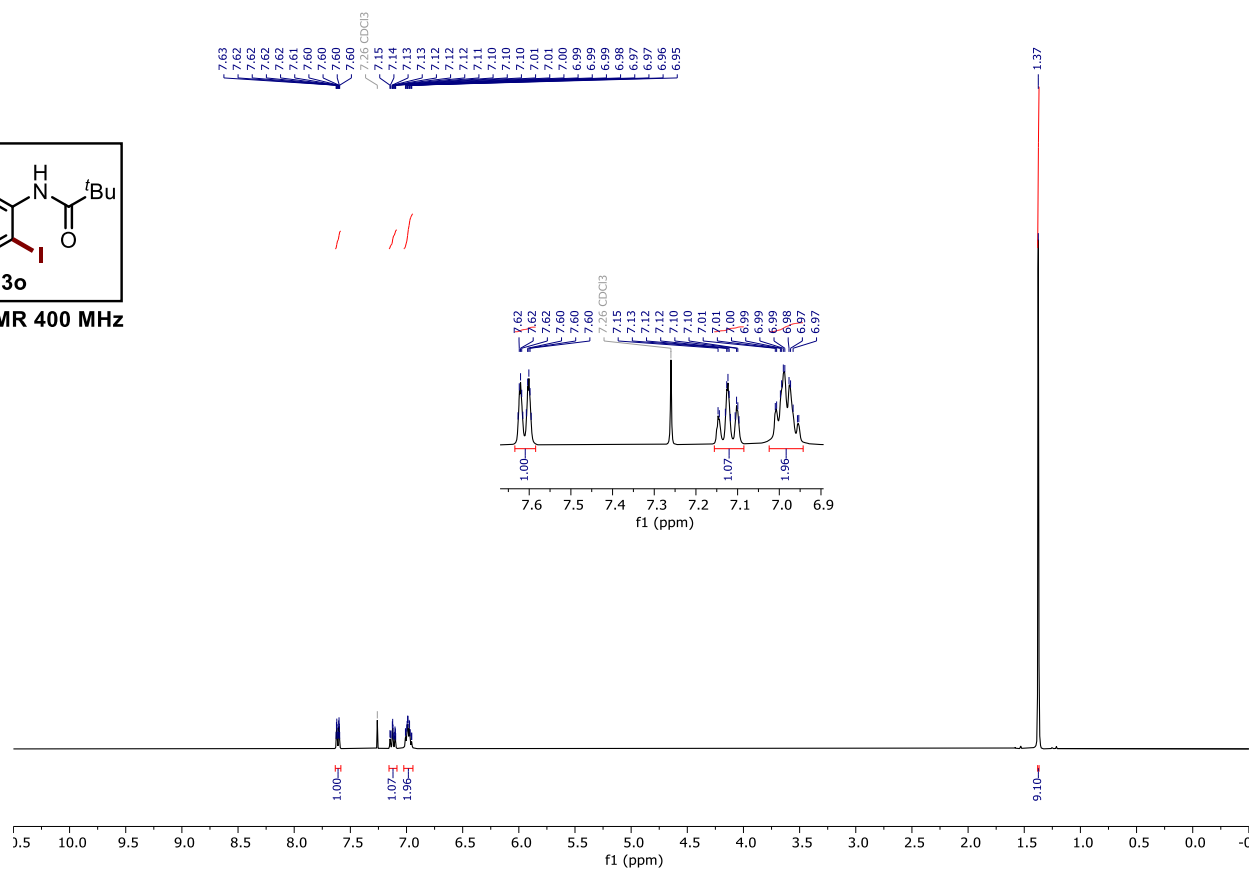

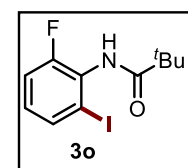

<sup>13</sup>C NMR 101 MHz

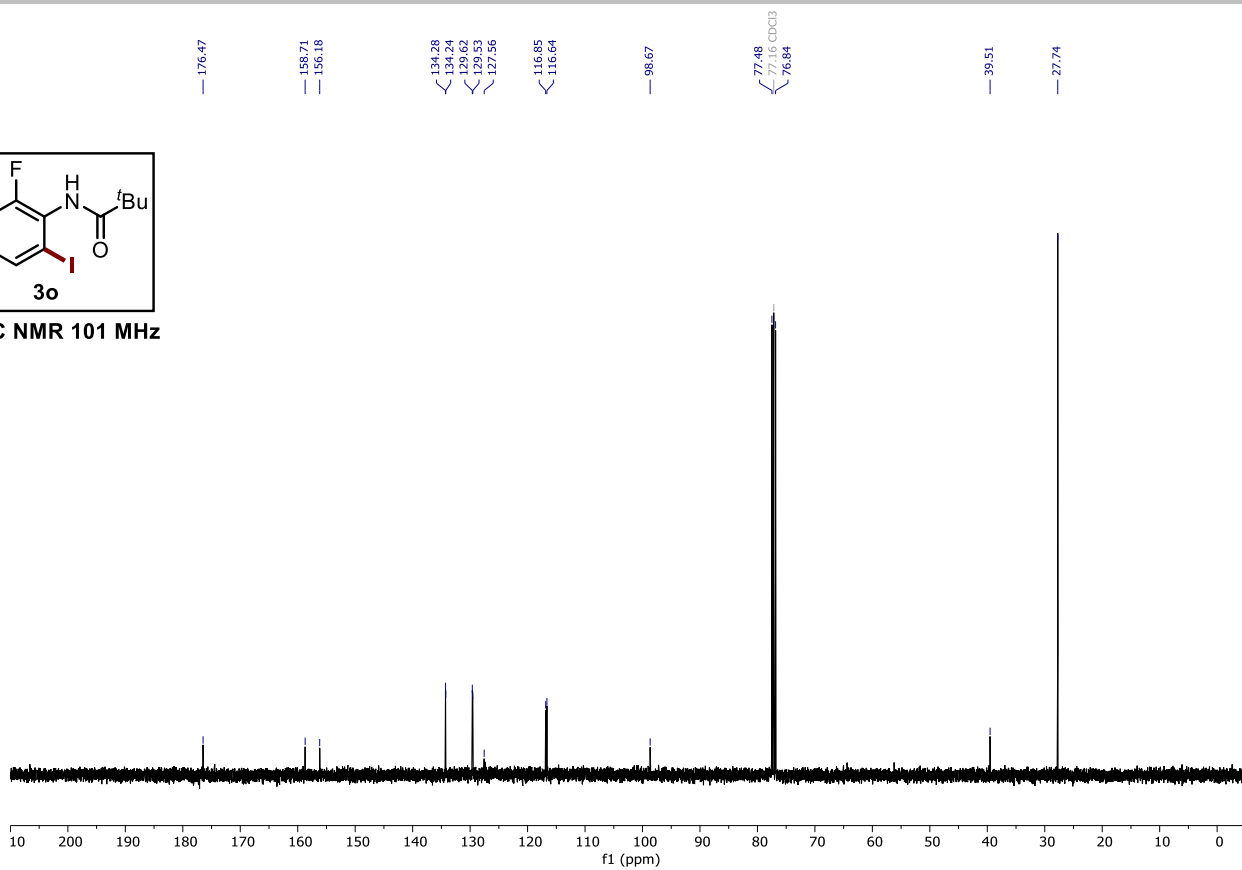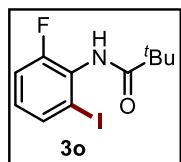

<sup>19</sup>F NMR 470 MHz

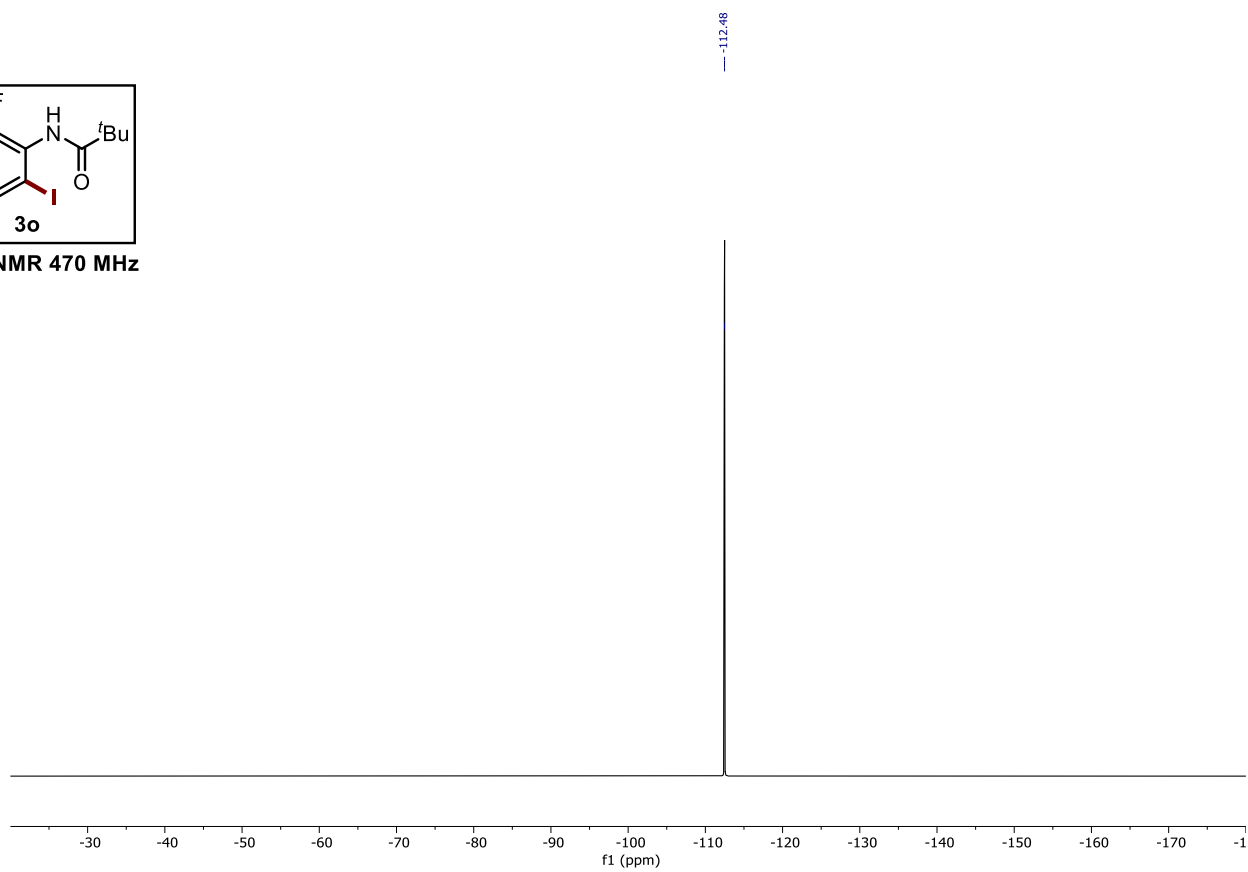



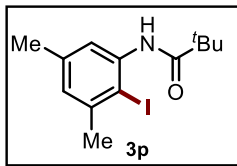

<sup>1</sup>H NMR 400 MHz

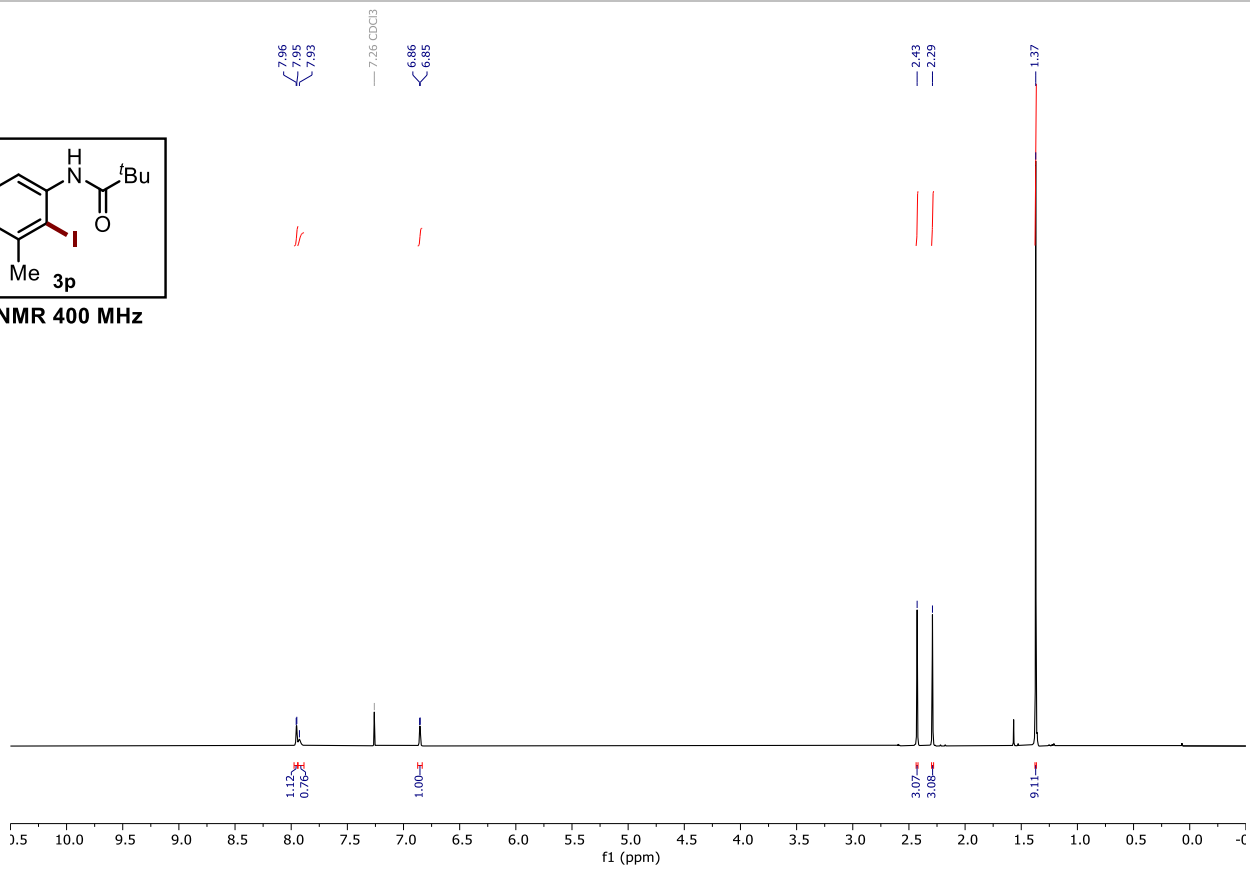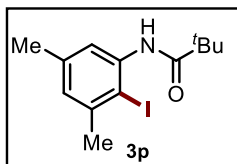

<sup>13</sup>C NMR 101 MHz

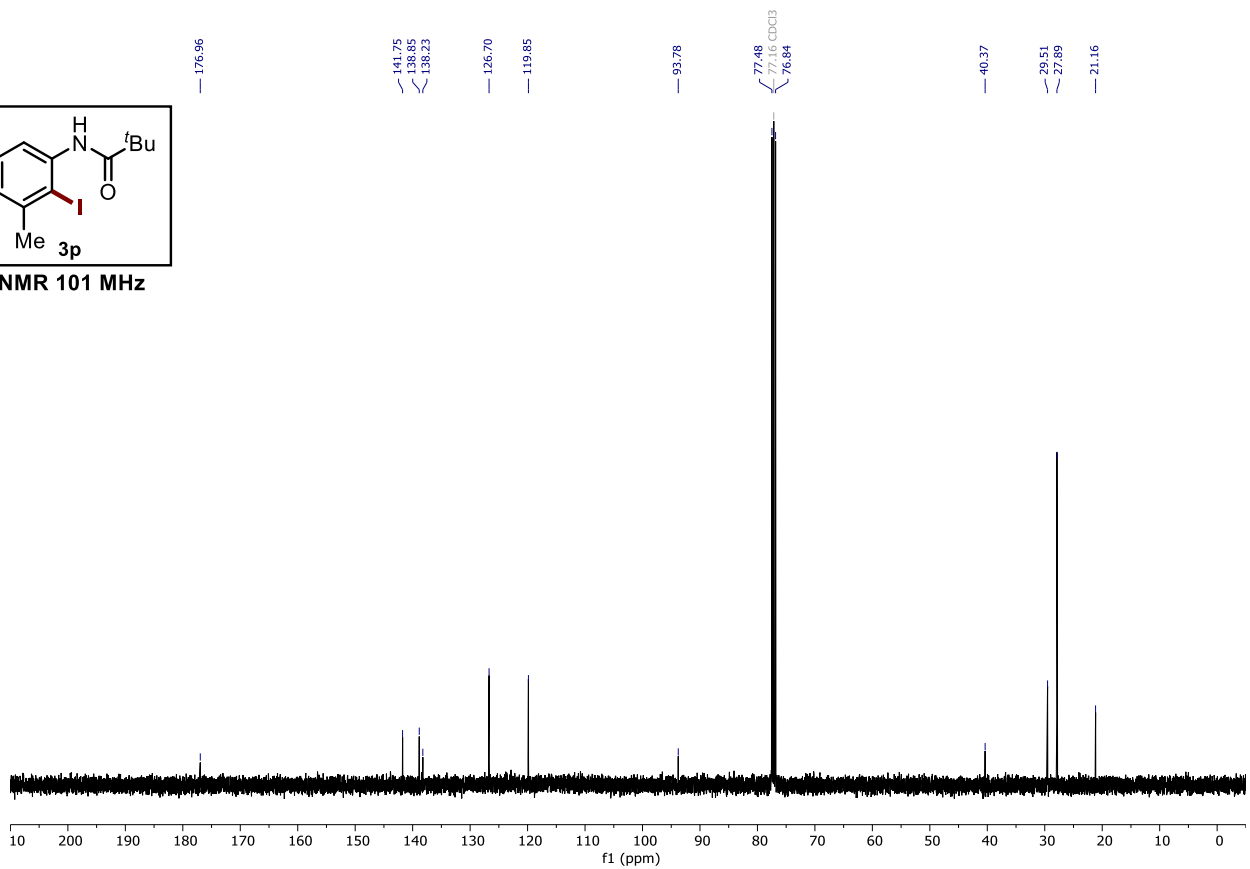

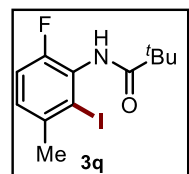

<sup>1</sup>H NMR 400 MHz

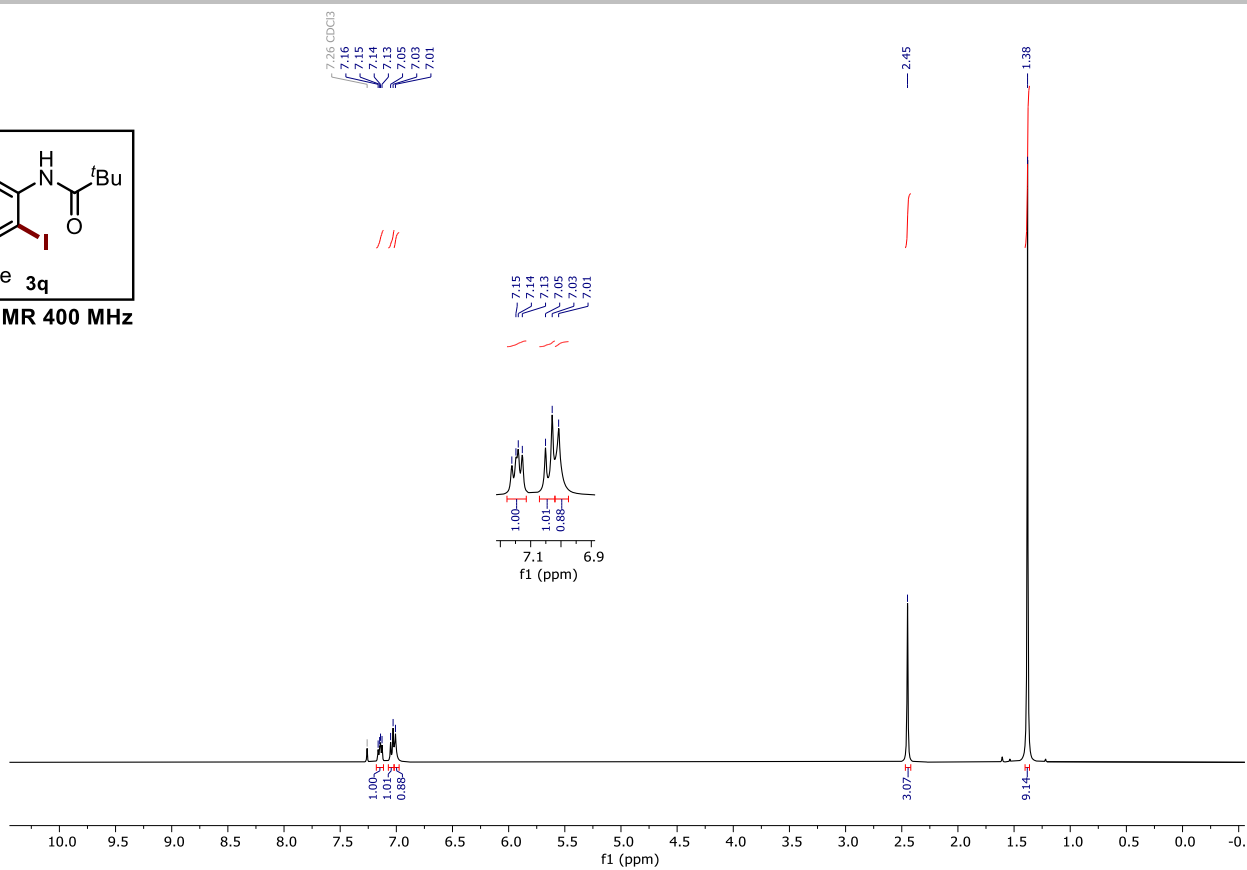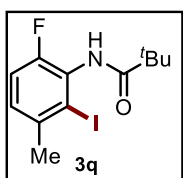

<sup>13</sup>C NMR 101 MHz

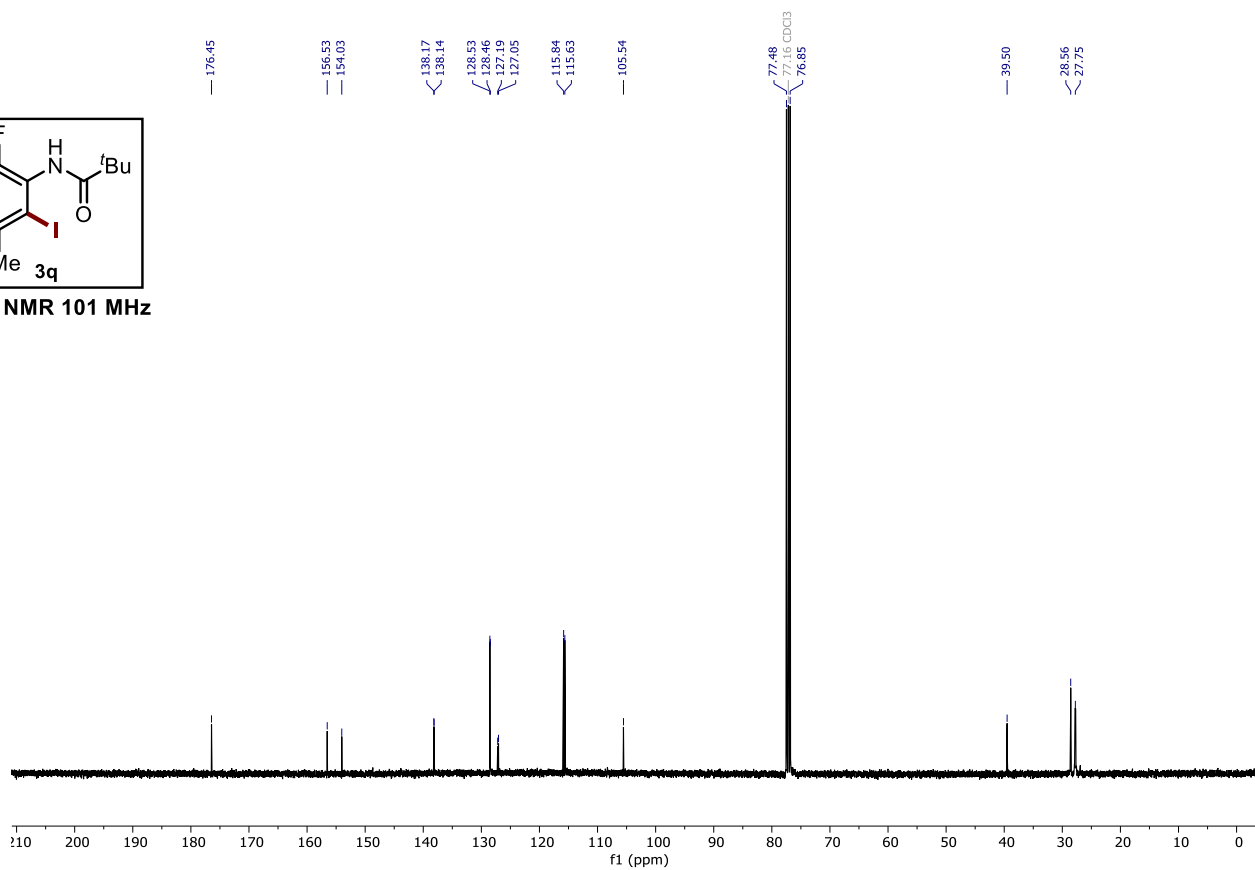

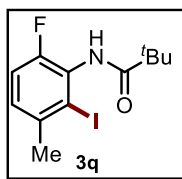

<sup>19</sup>F NMR 470 MHz

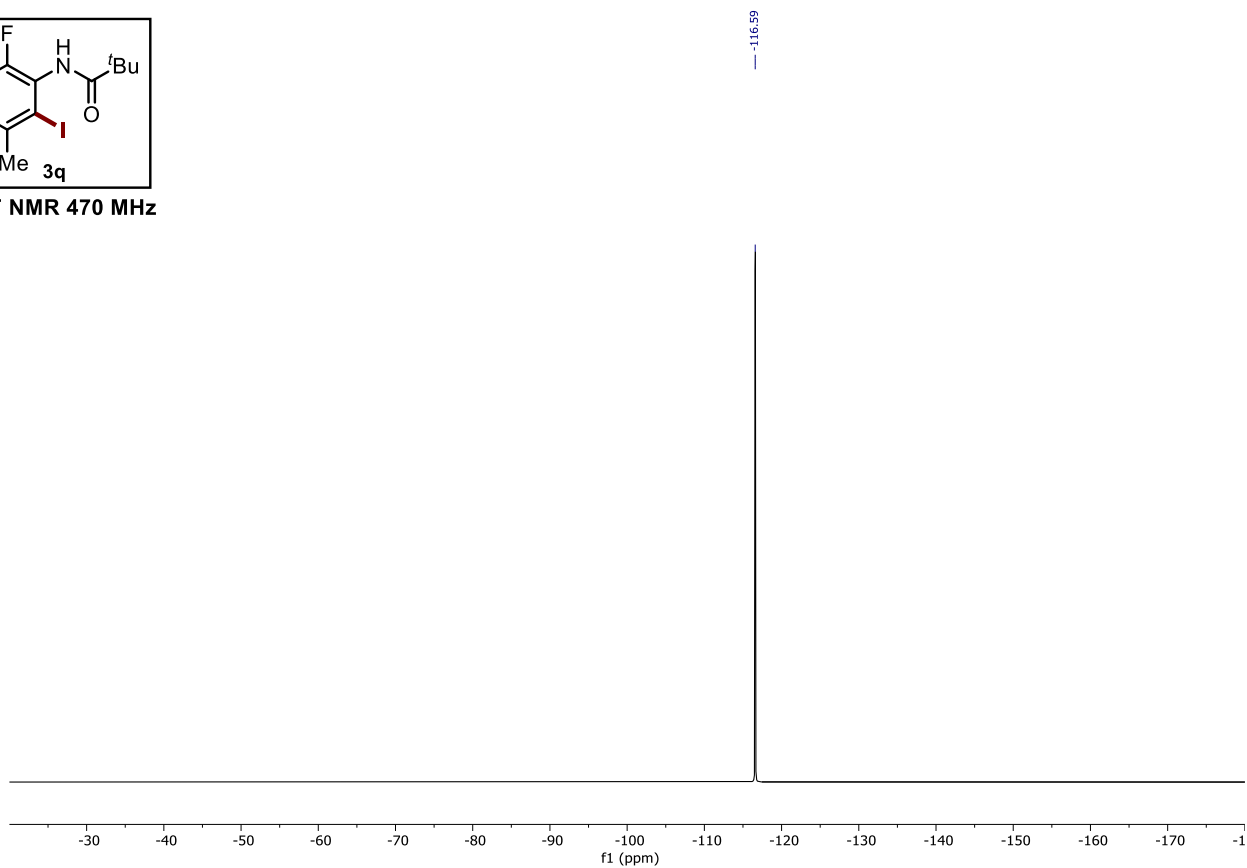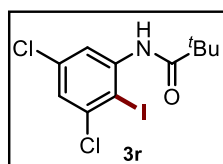

<sup>1</sup>H NMR 400 MHz

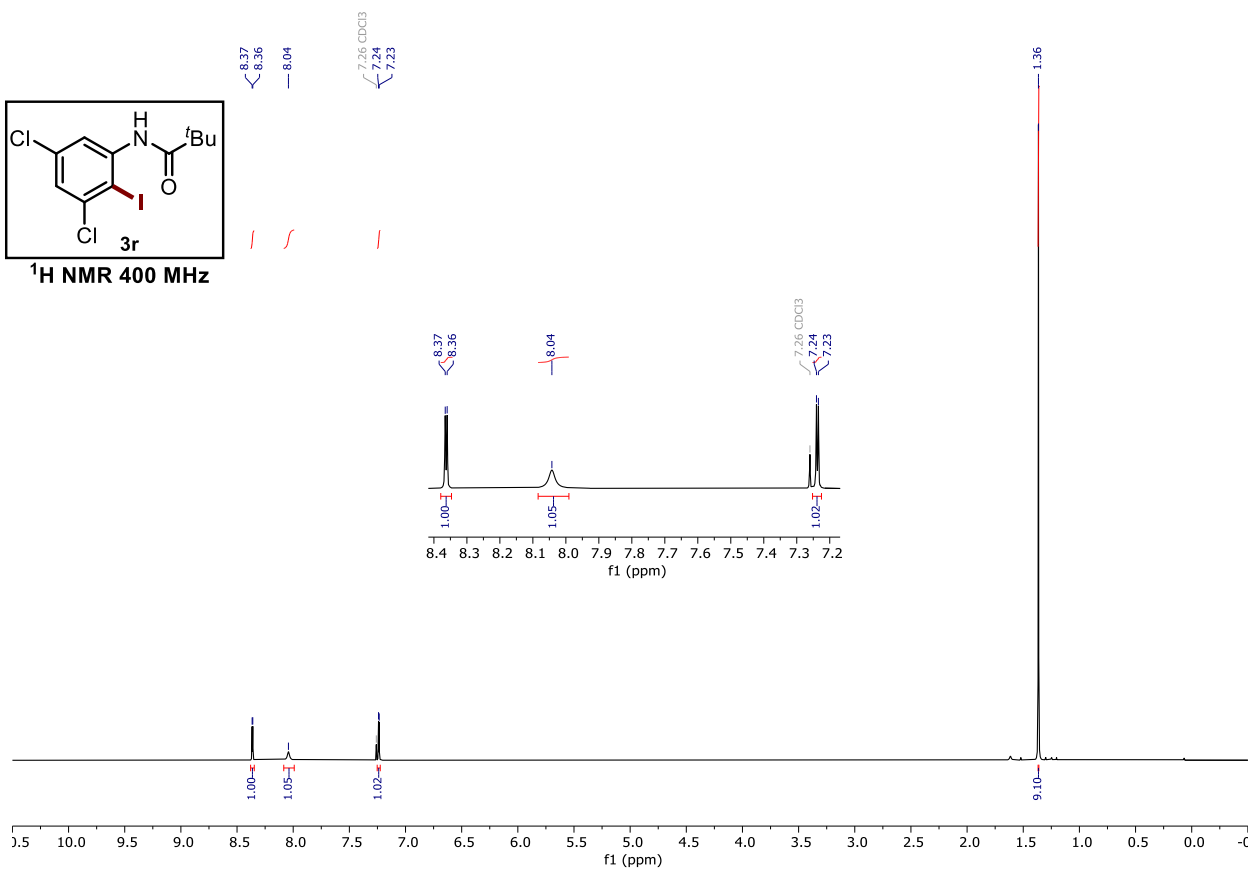

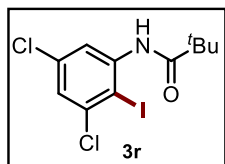

**<sup>13</sup>C NMR 101 MHz**

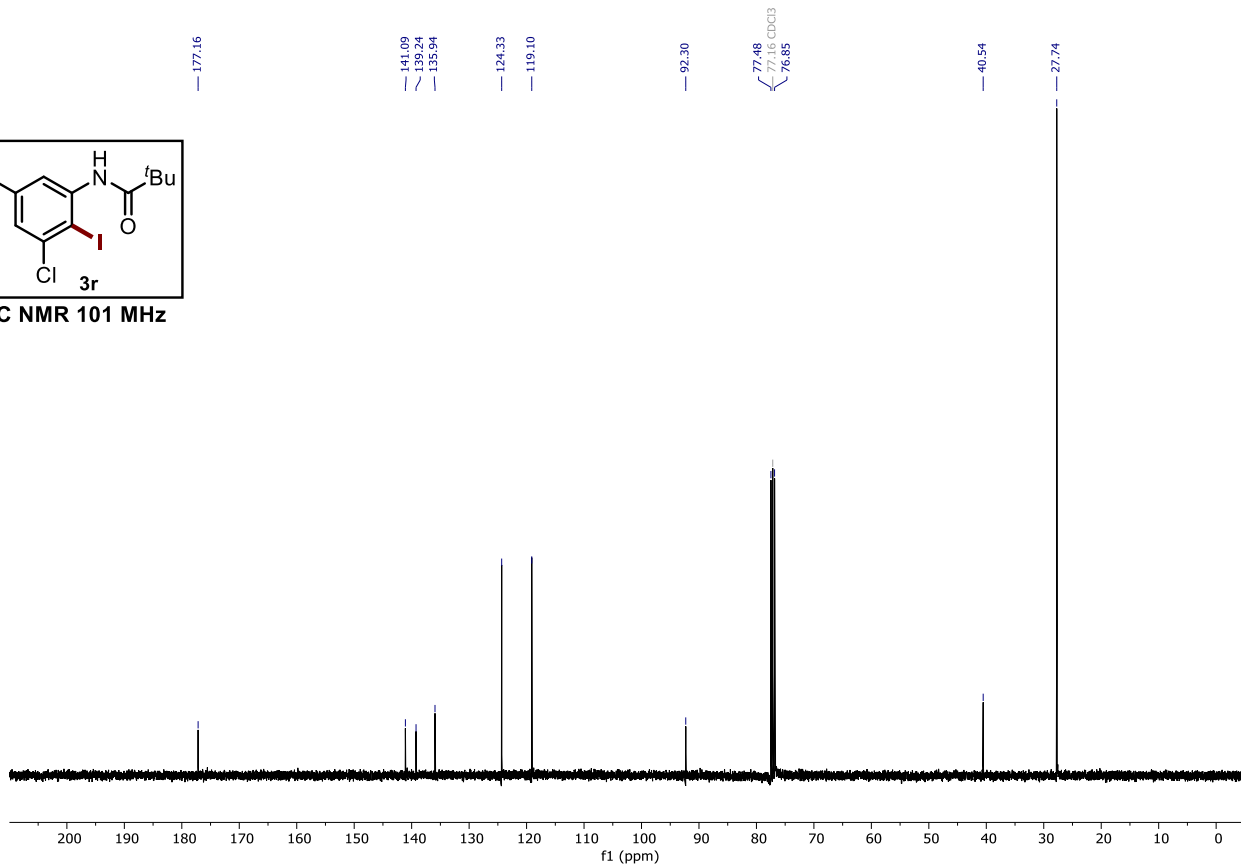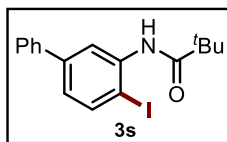

**<sup>1</sup>H NMR 400 MHz**

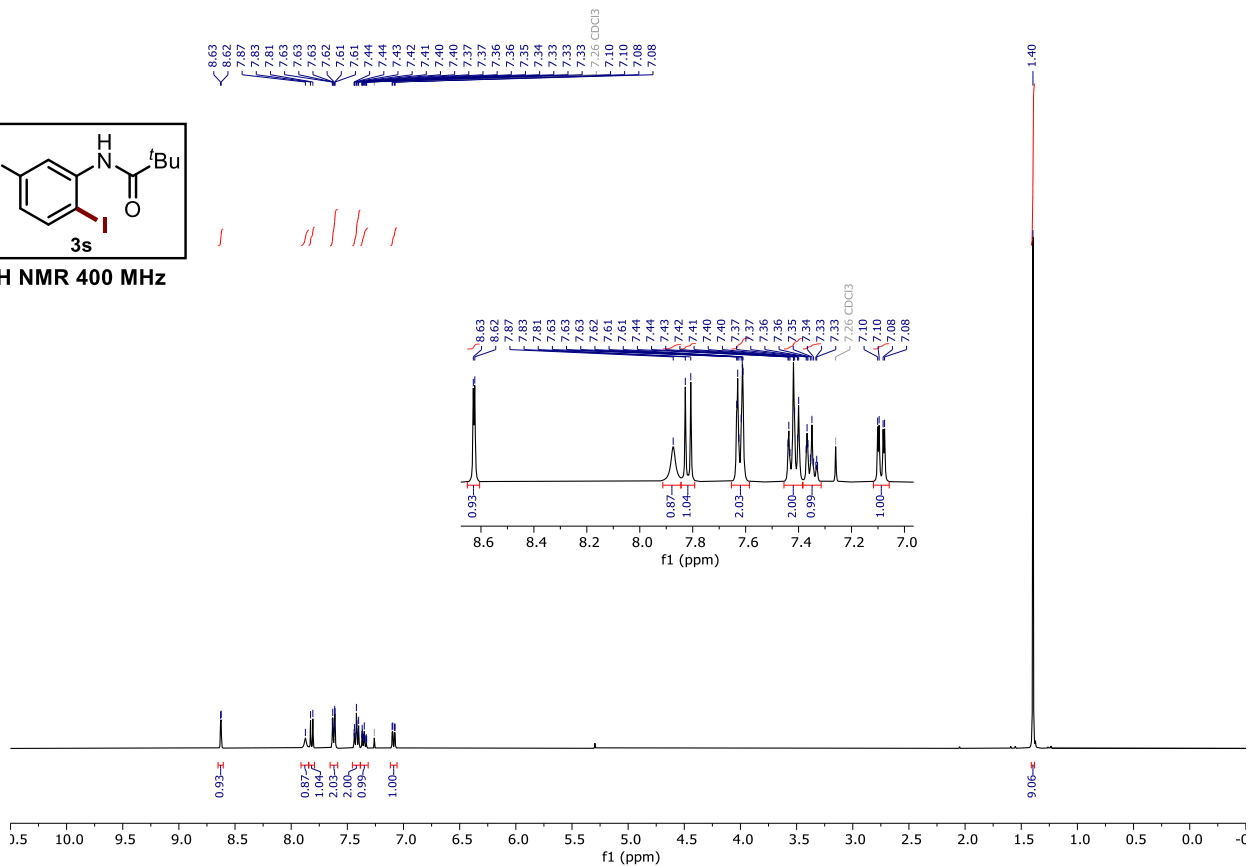





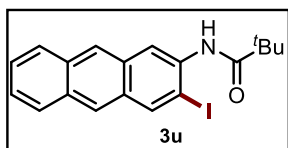

<sup>13</sup>C NMR 101 MHz

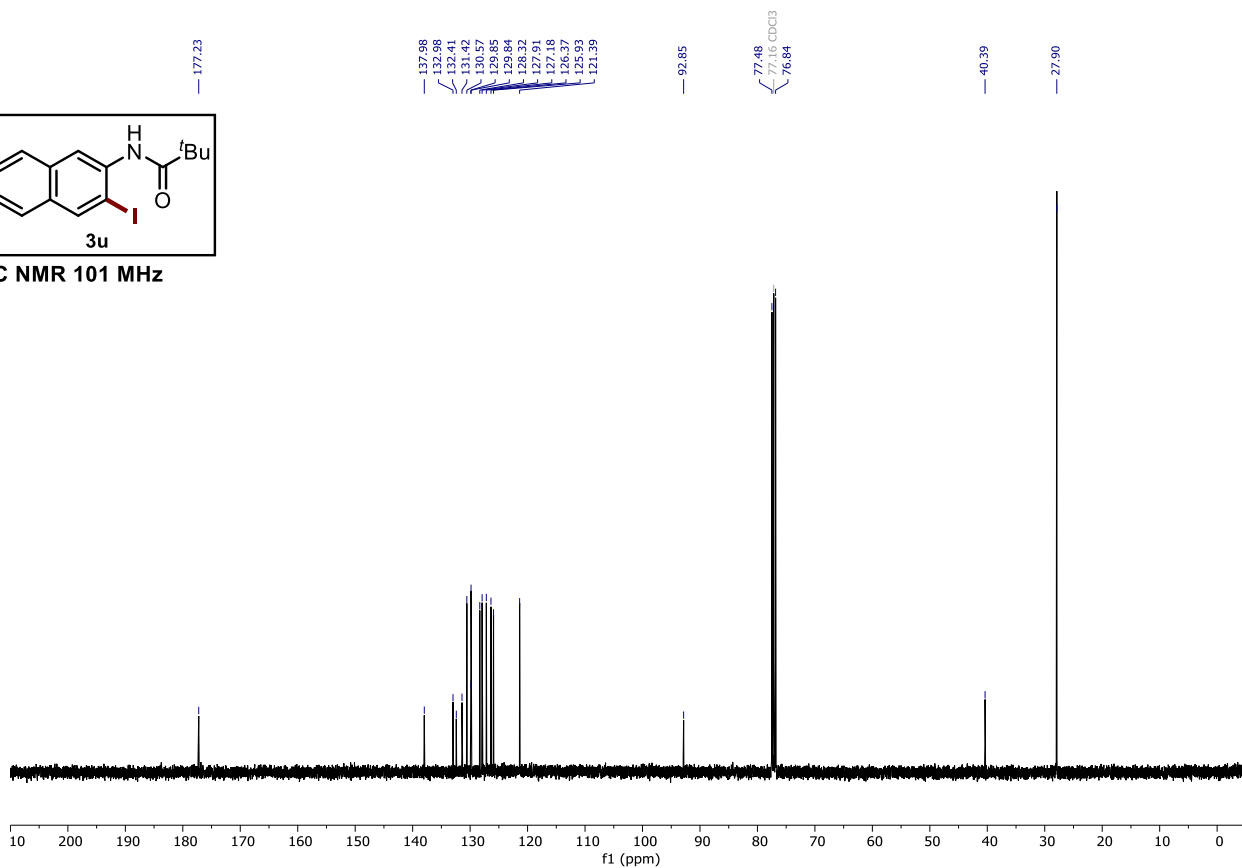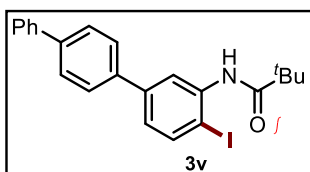

<sup>1</sup>H NMR 400 MHz

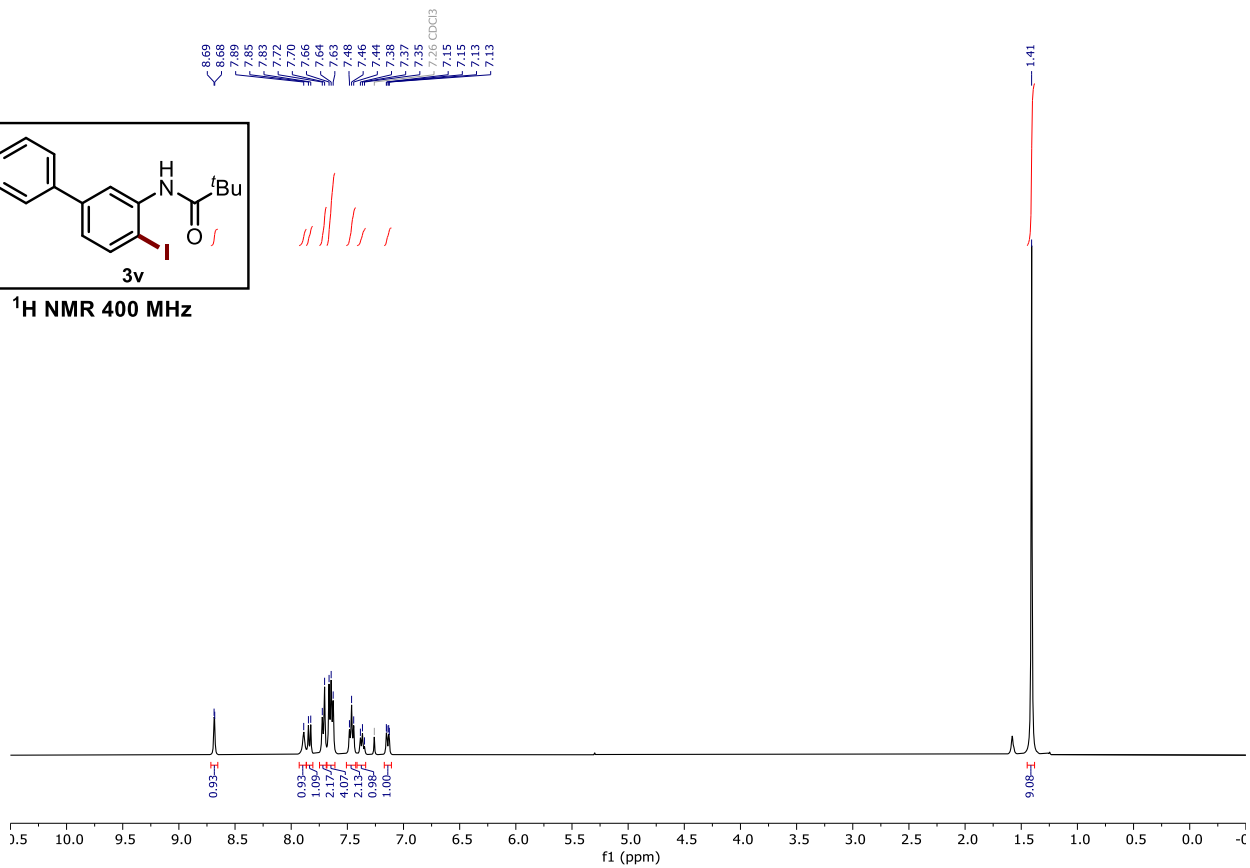

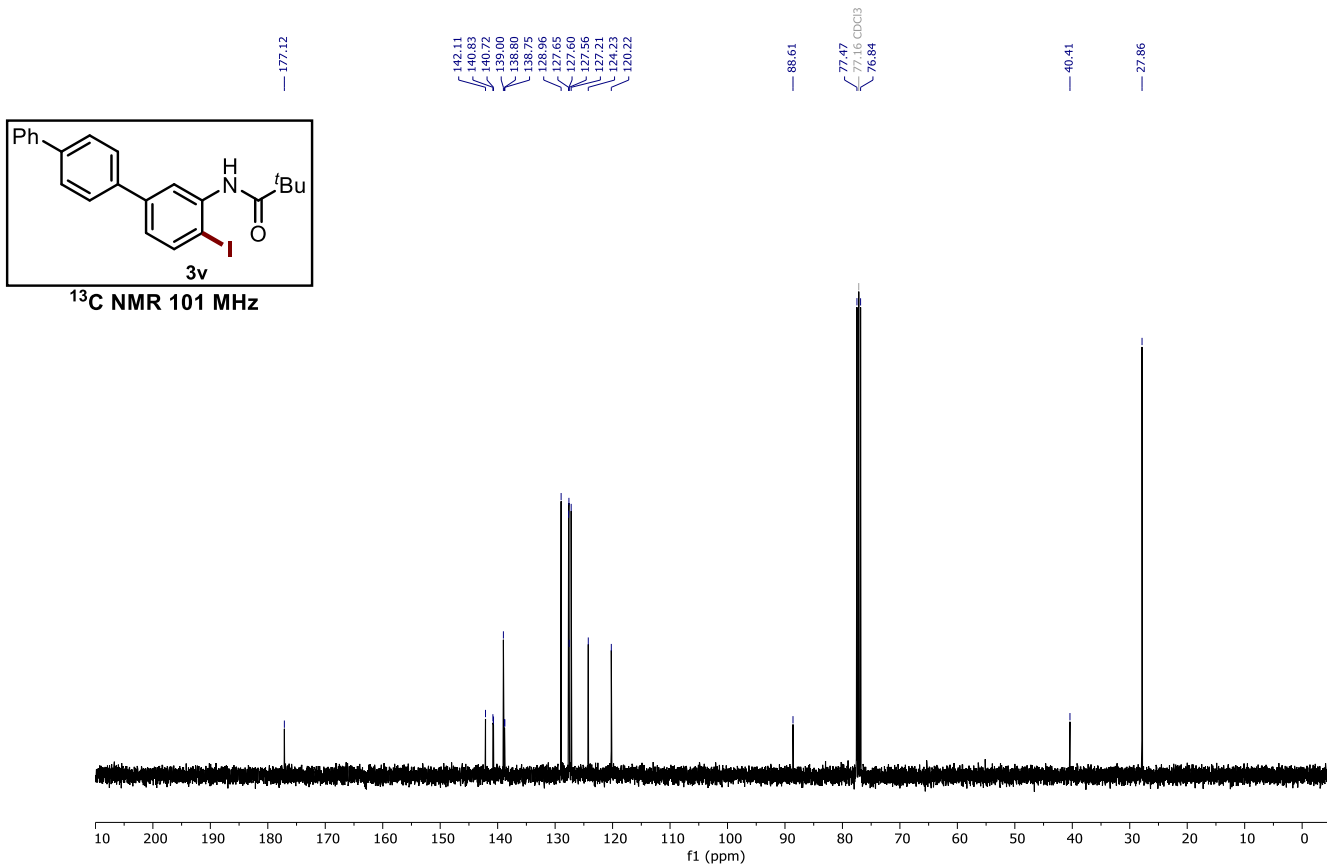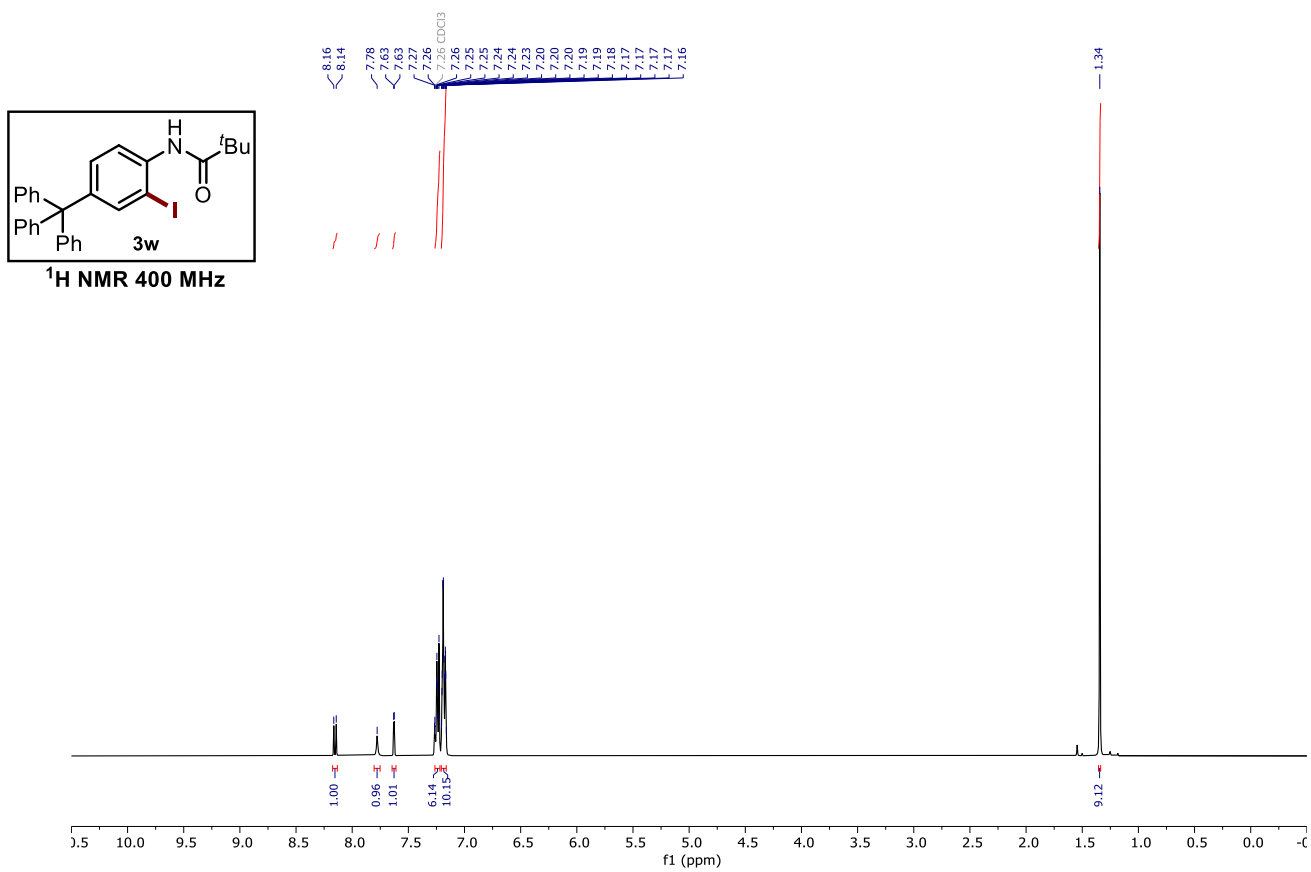





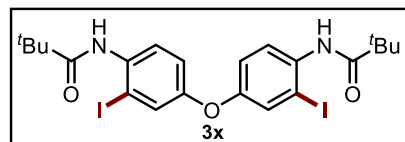

<sup>13</sup>C NMR 101 MHz

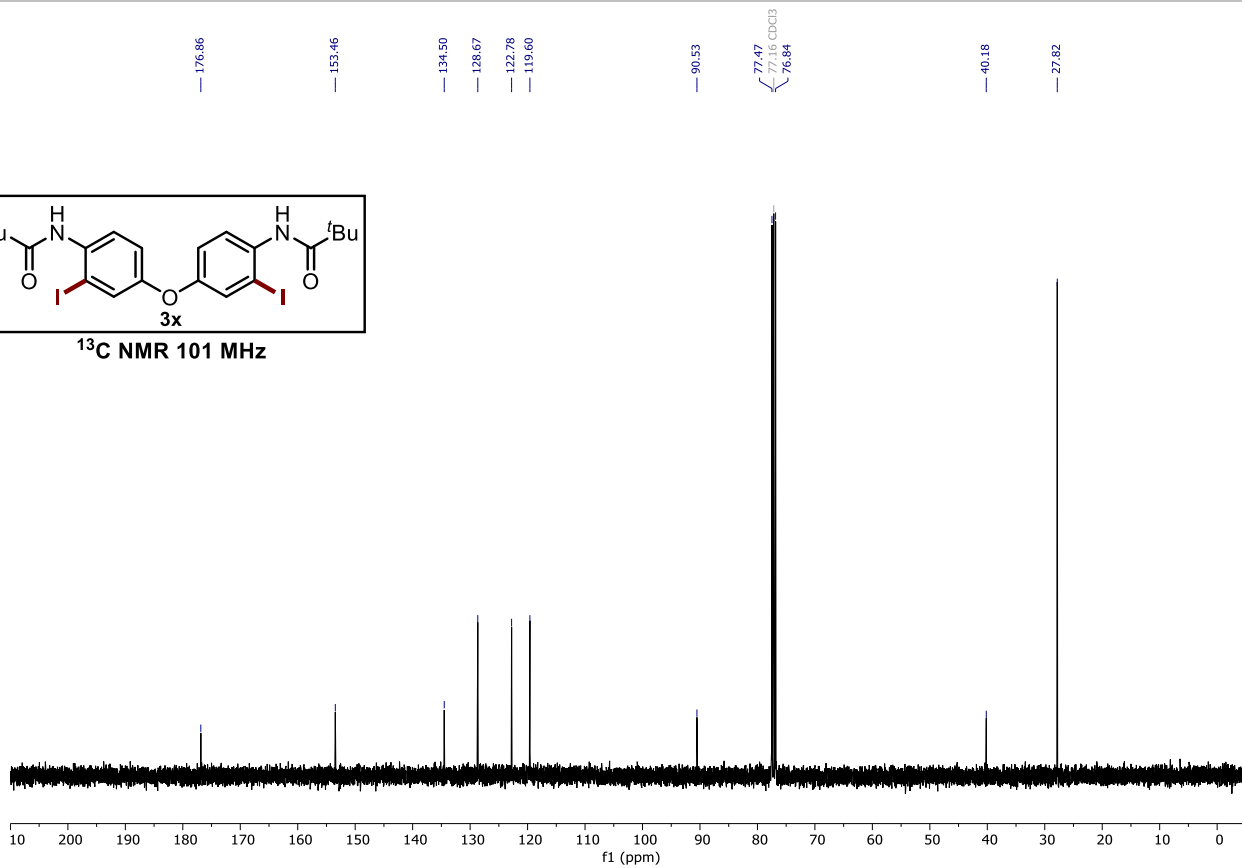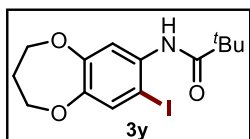

<sup>1</sup>H NMR 400 MHz

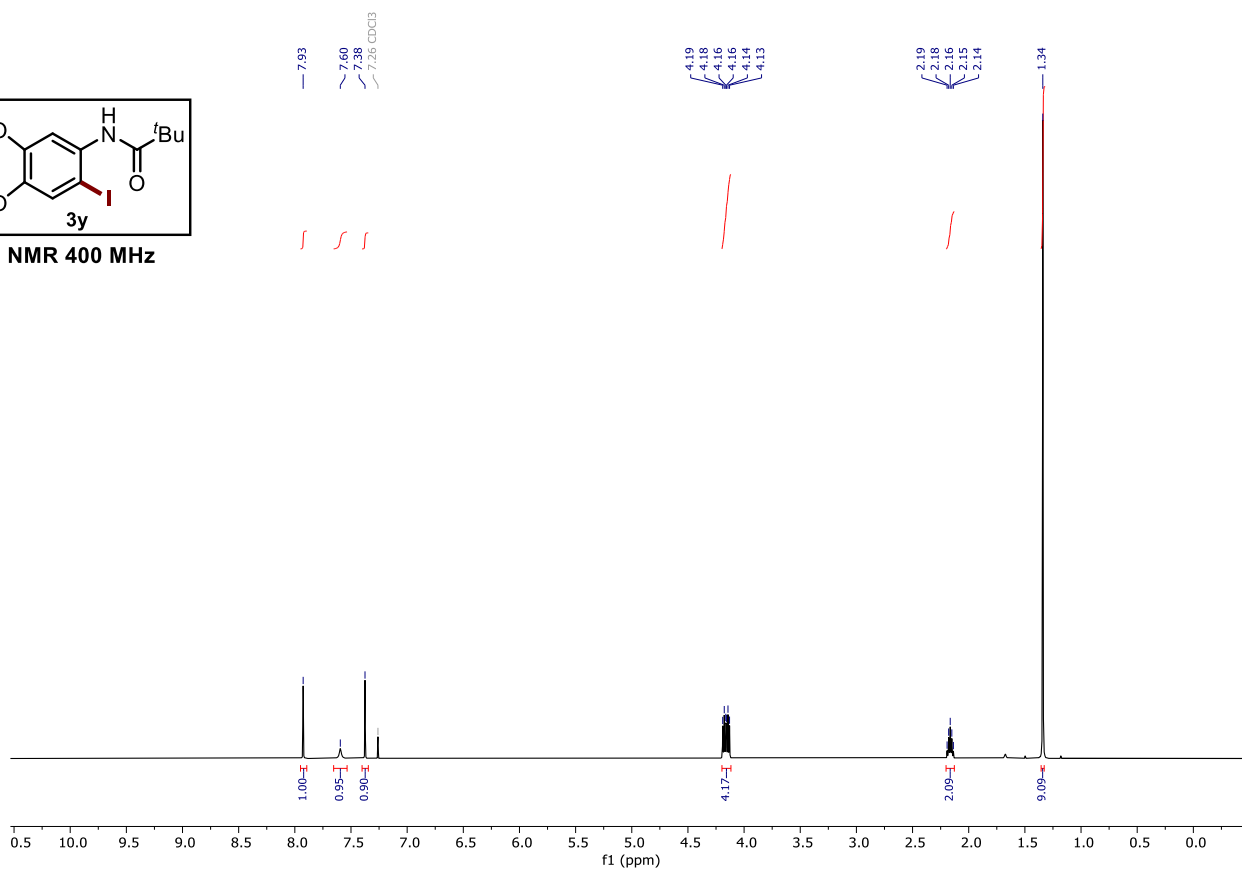

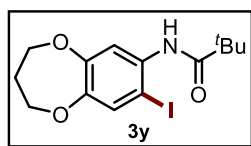

<sup>13</sup>C NMR 101 MHz

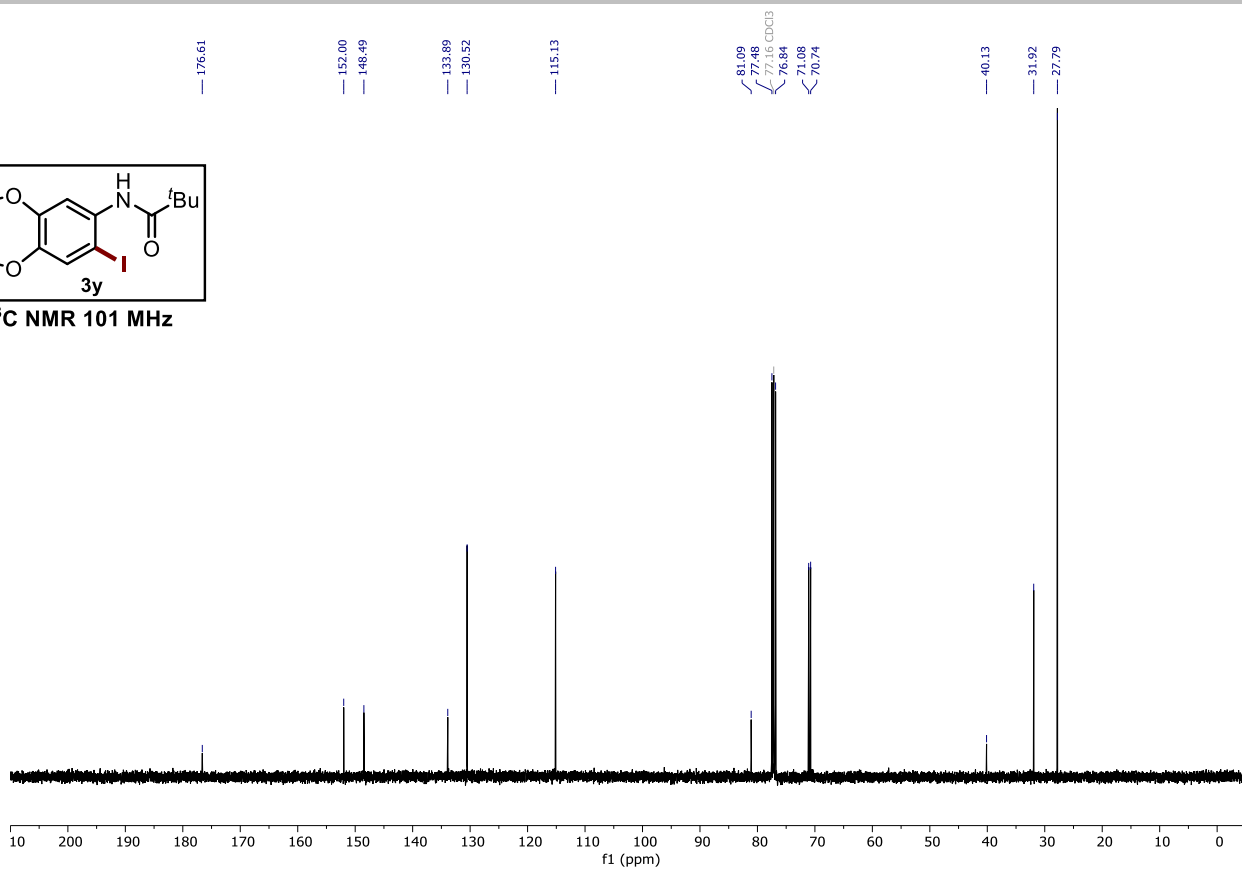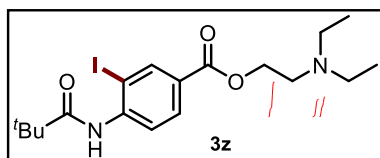

<sup>1</sup>H NMR 400 MHz

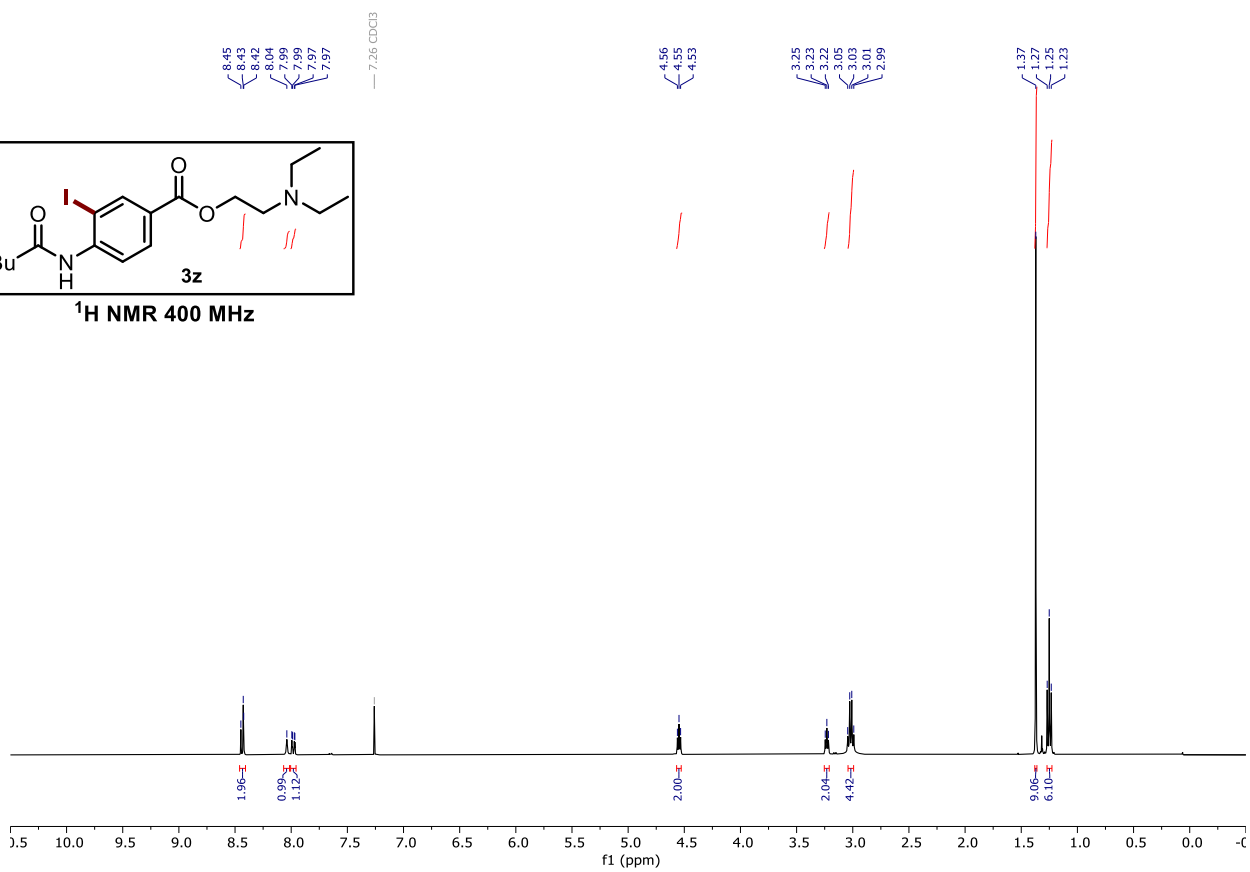

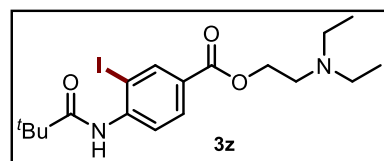

**3z**  
<sup>13</sup>C NMR 101 MHz

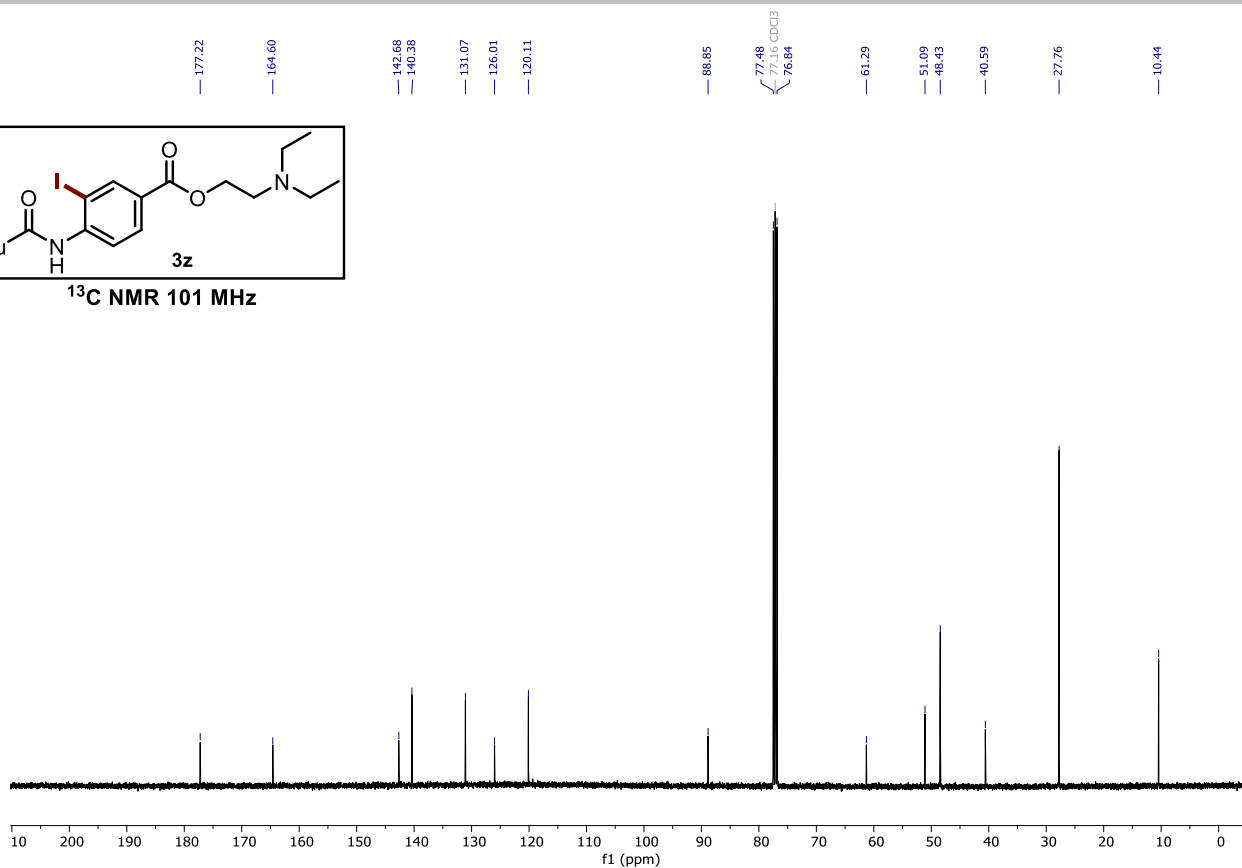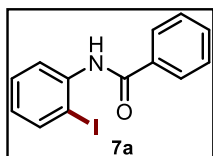

**7a**  
<sup>1</sup>H NMR 400 MHz

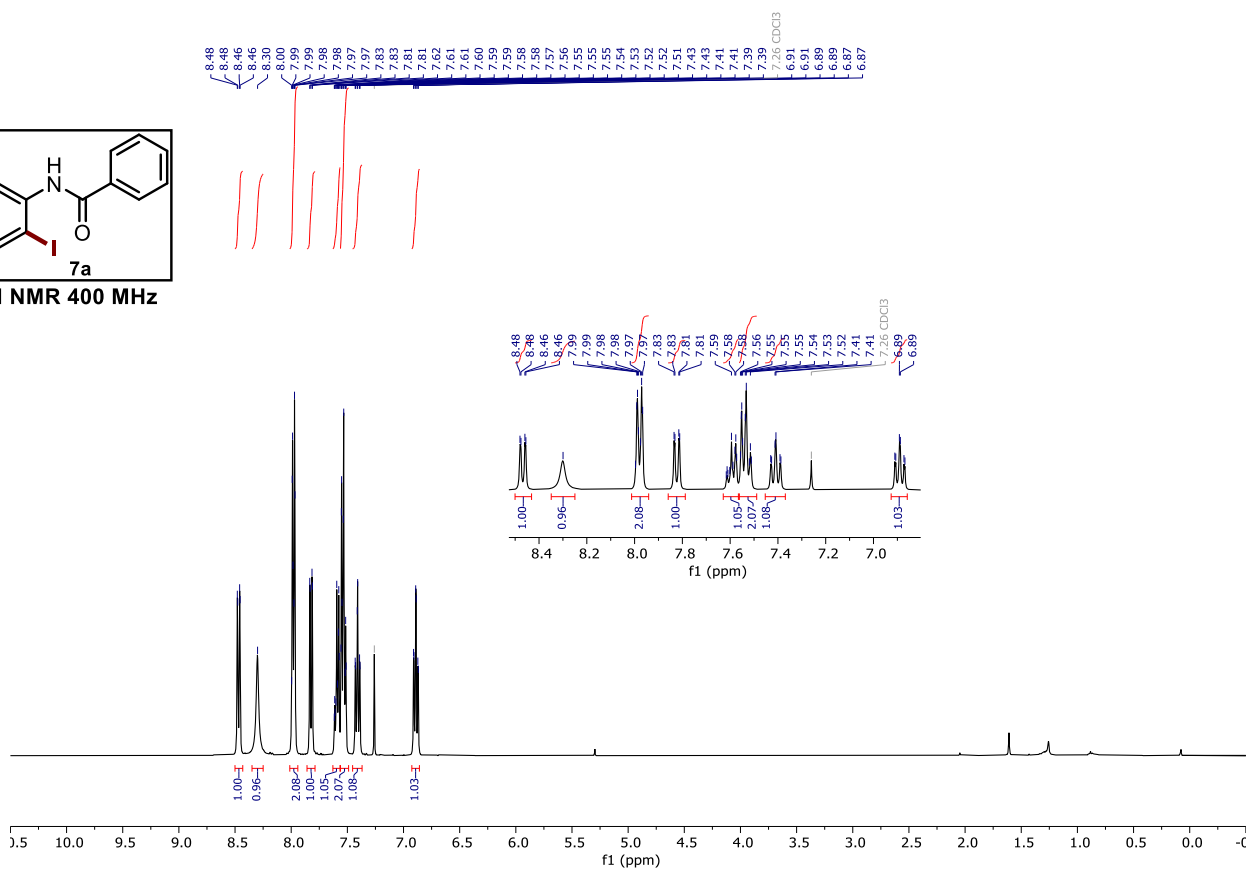

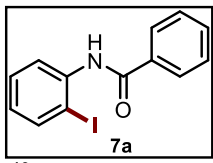

<sup>13</sup>C NMR 101 MHz

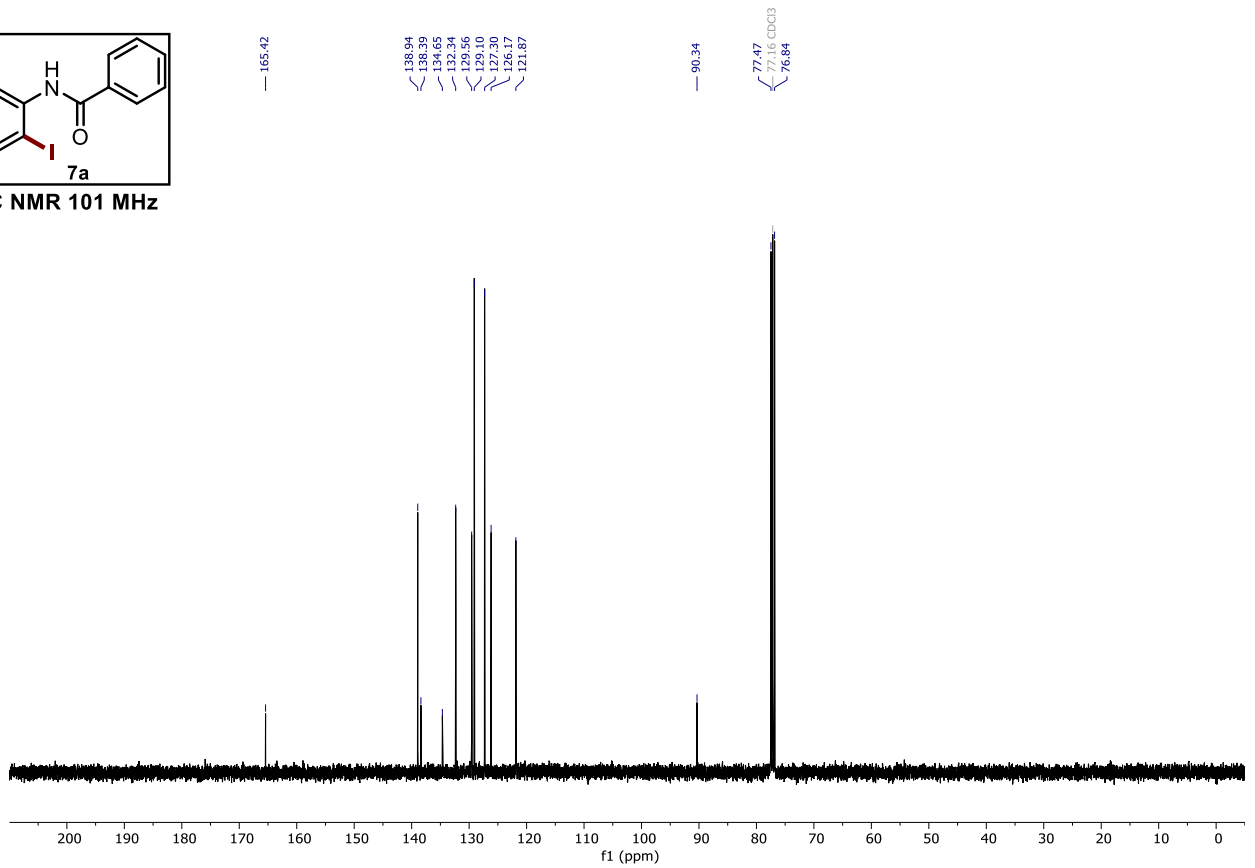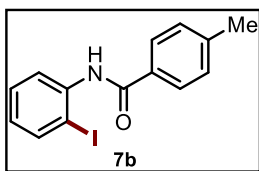

<sup>1</sup>H NMR 400 MHz

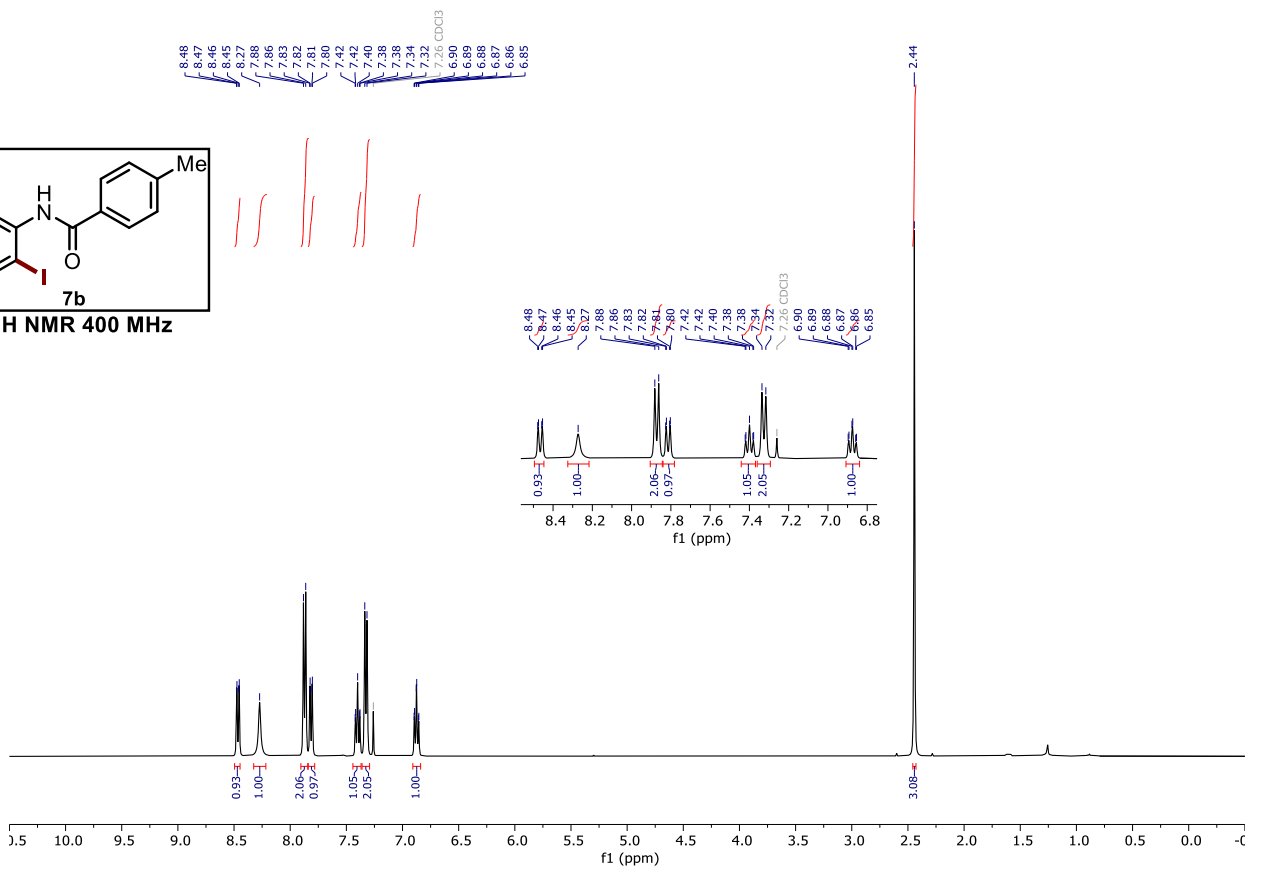

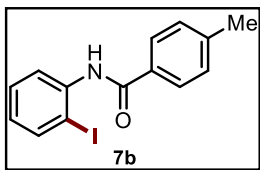

<sup>13</sup>C NMR 101 MHz

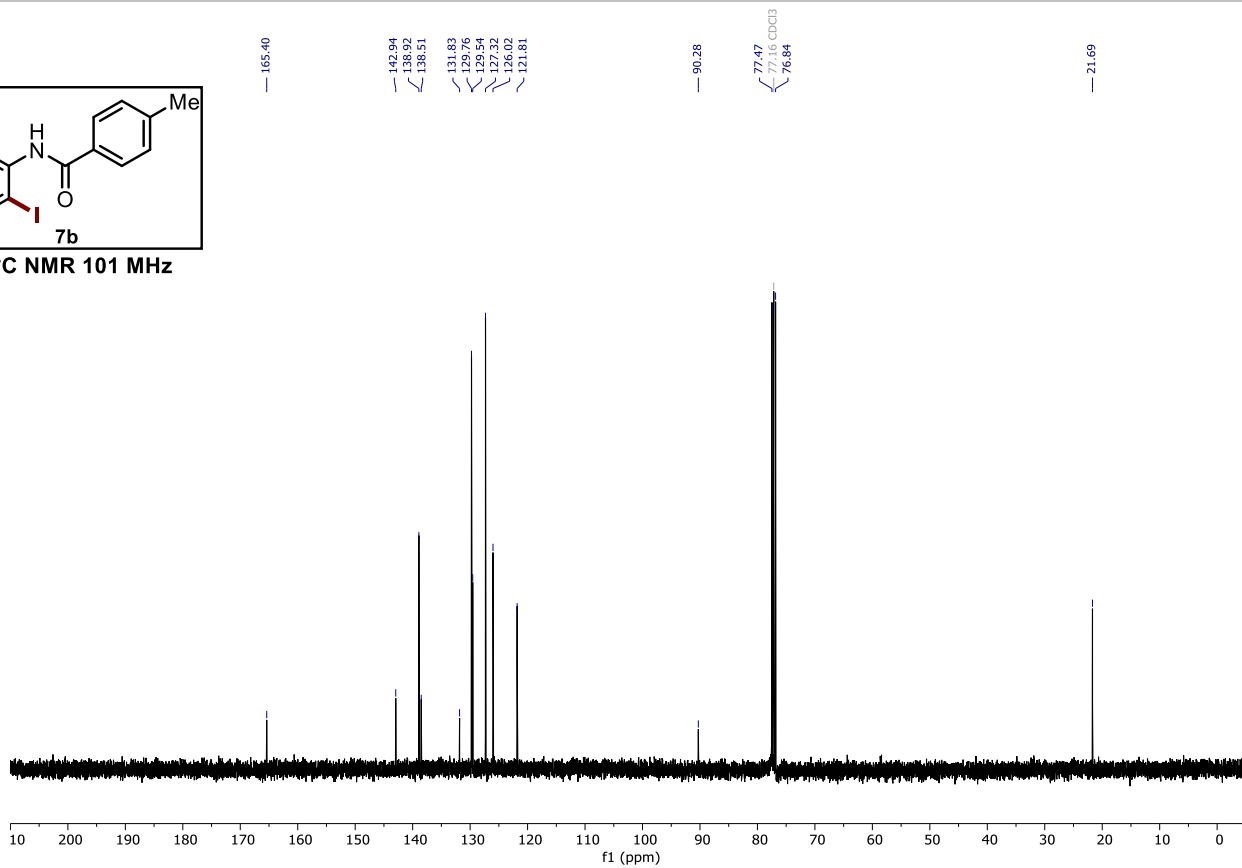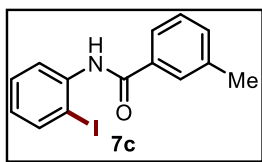

<sup>1</sup>H NMR 400 MHz

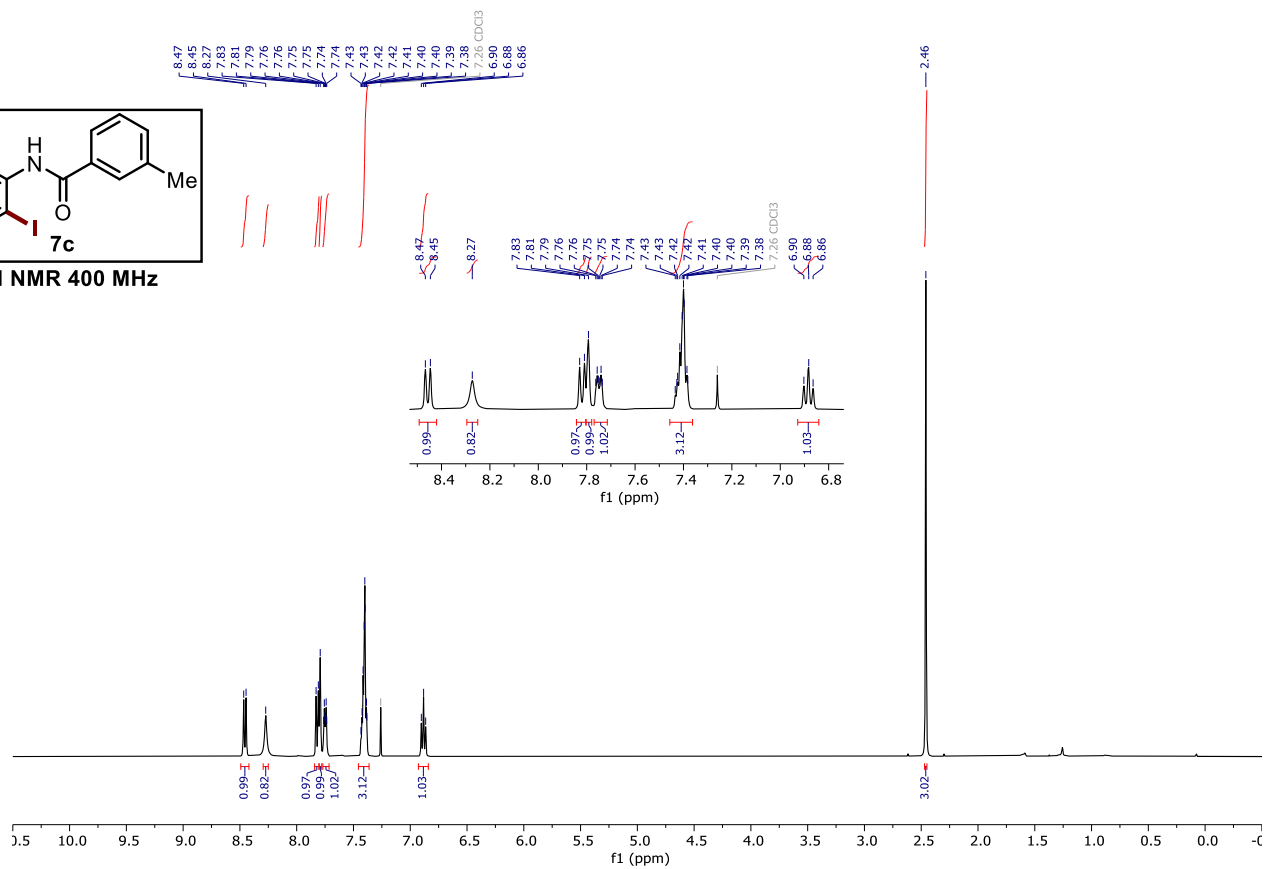

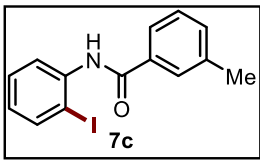

<sup>13</sup>C NMR 101 MHz

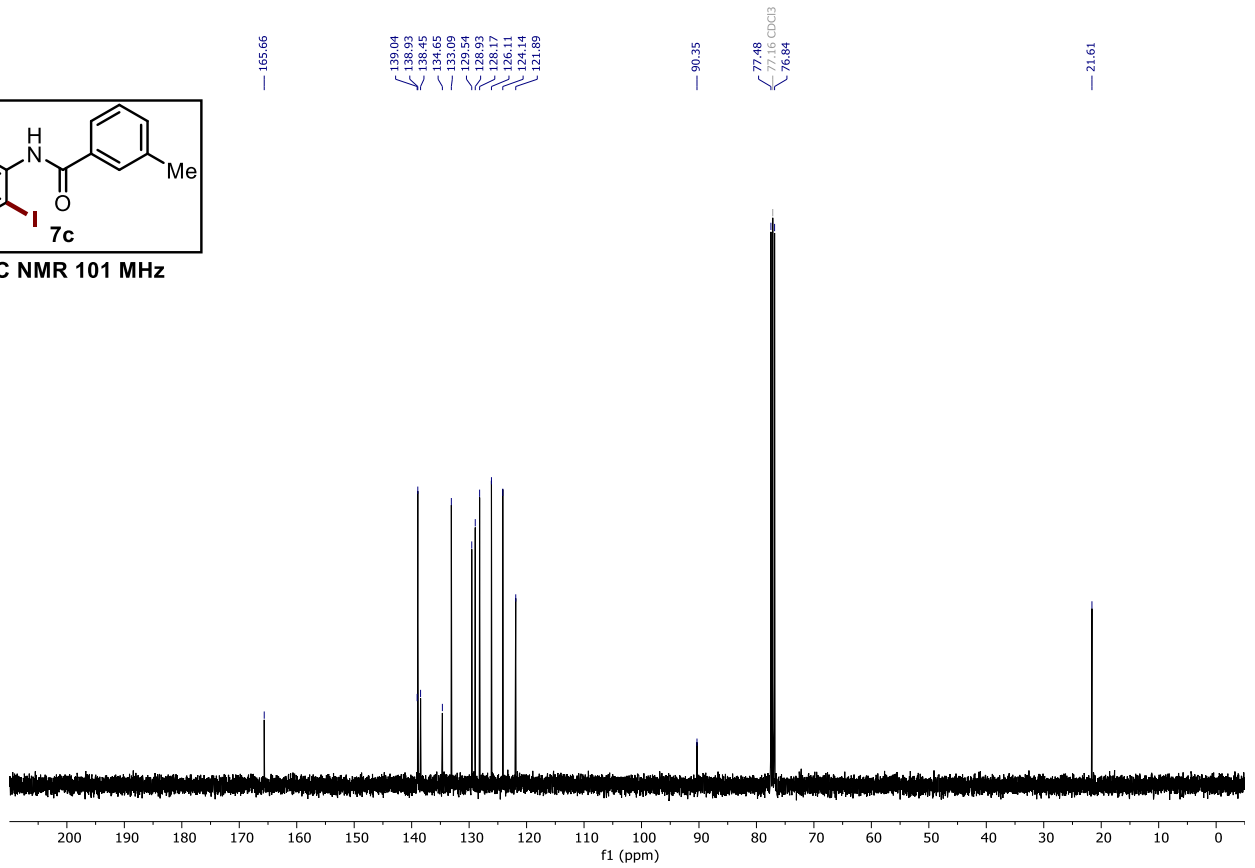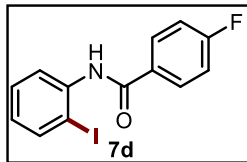

<sup>1</sup>H NMR 400 MHz

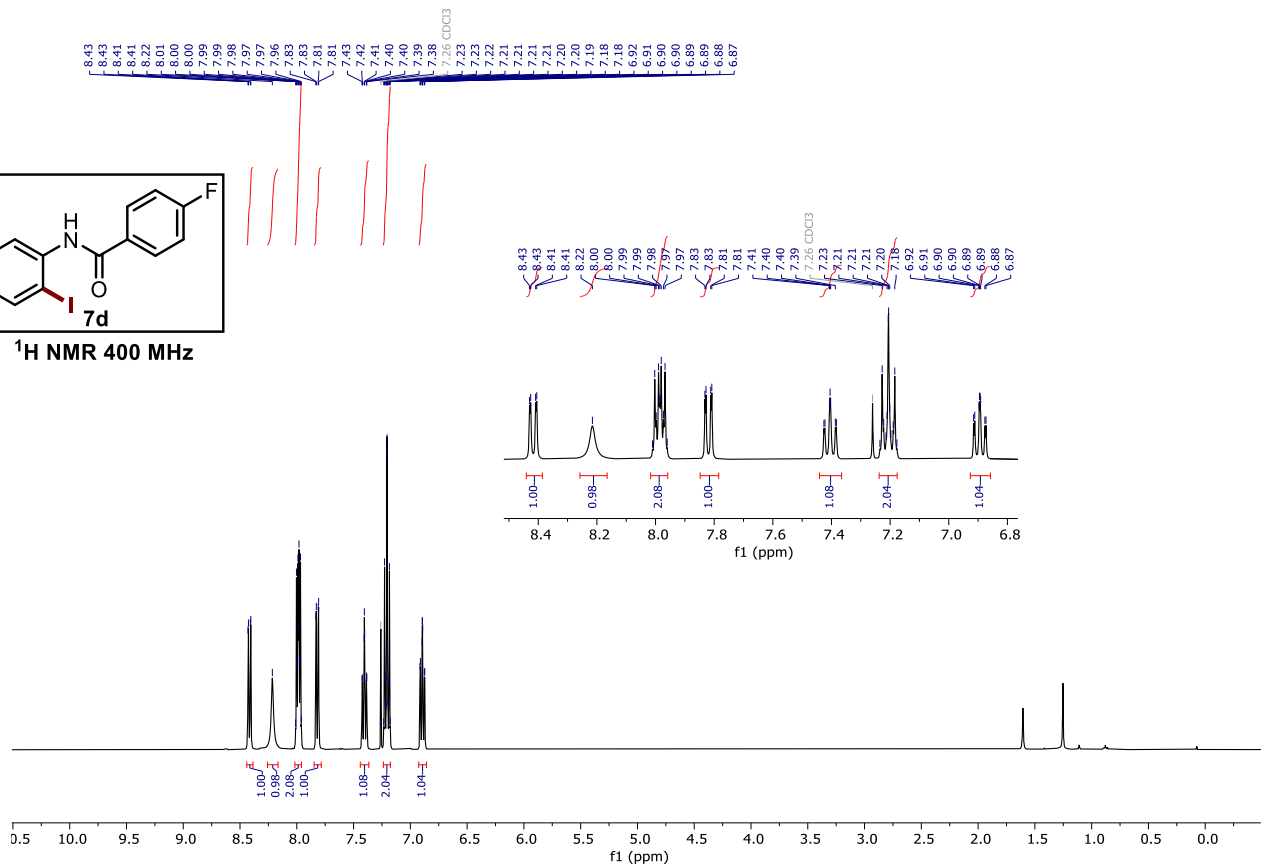

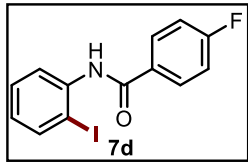

<sup>13</sup>C NMR 101 MHz

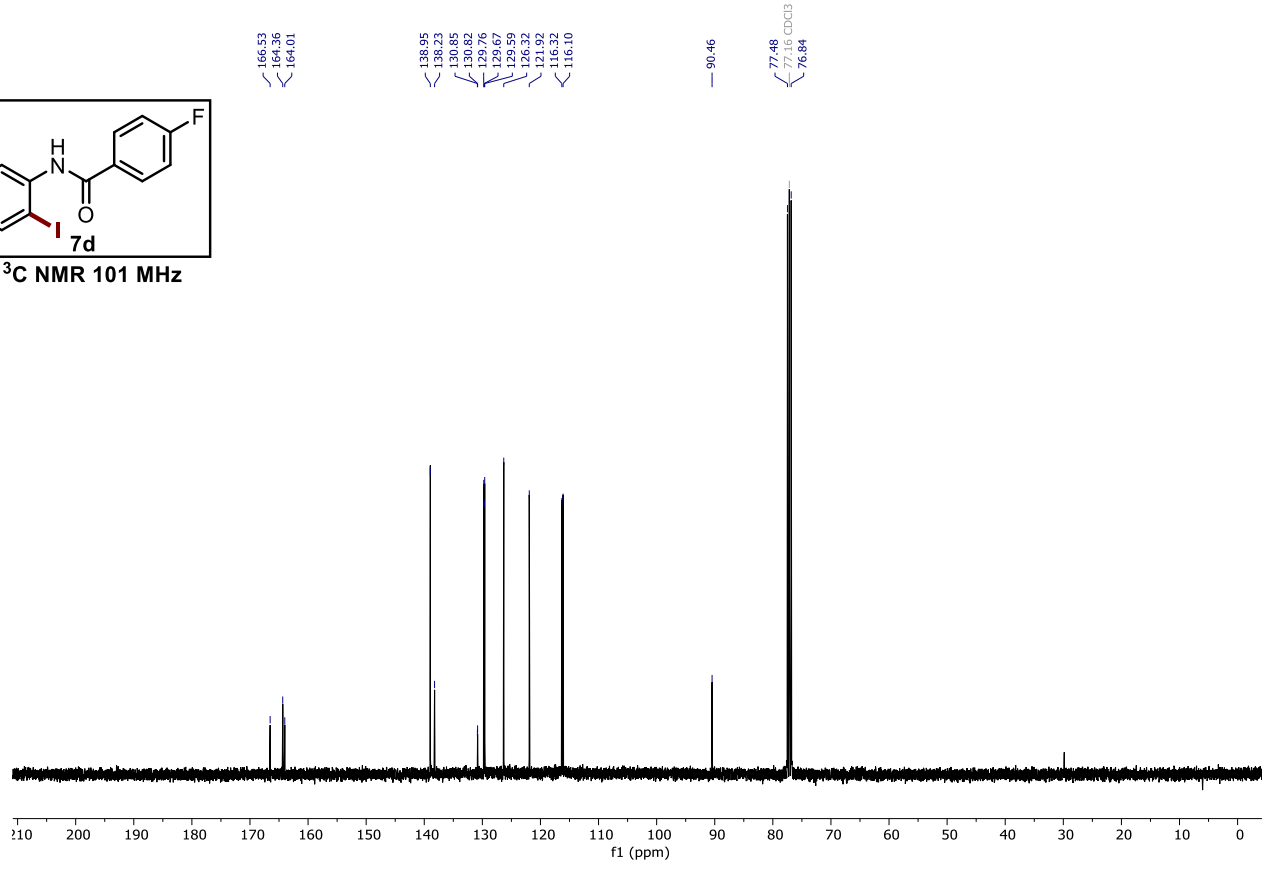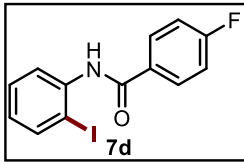

<sup>19</sup>F NMR 470 MHz

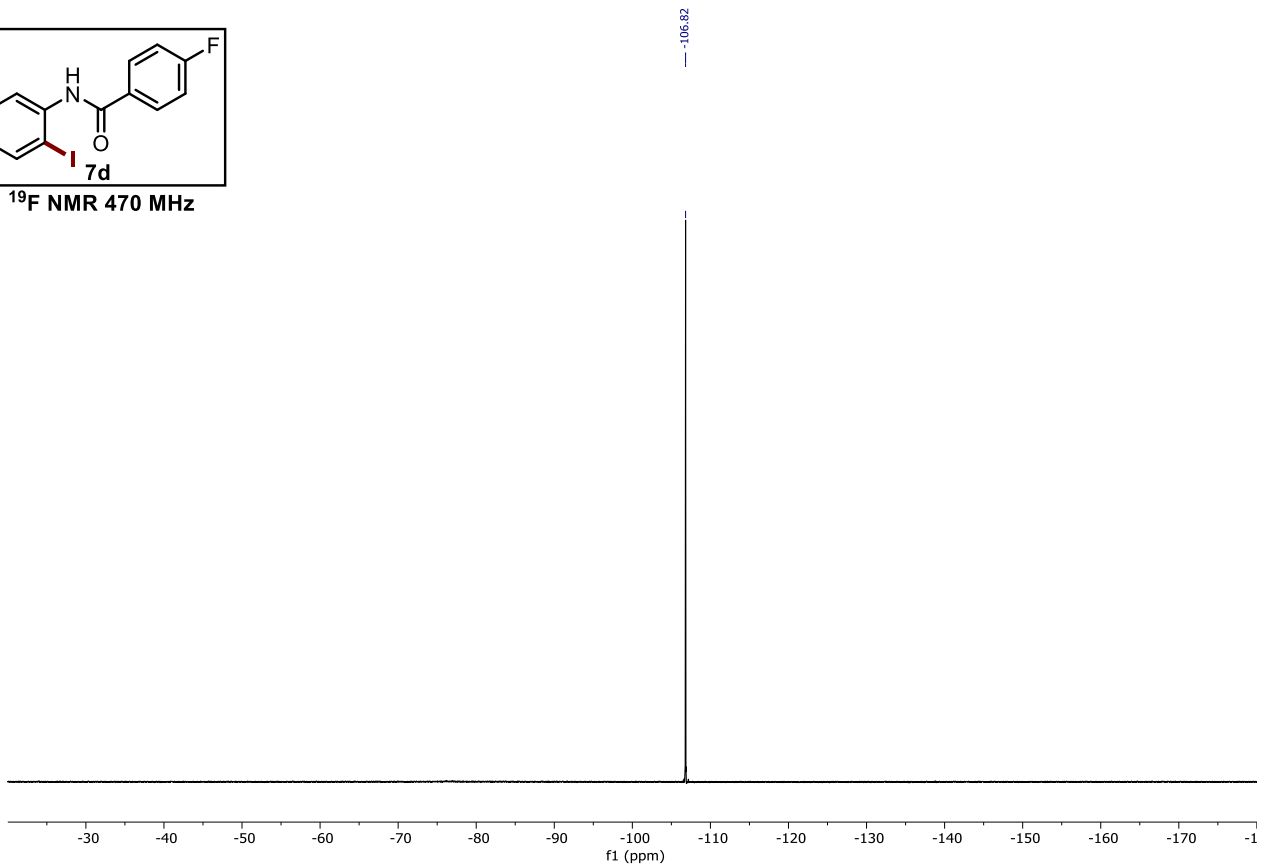



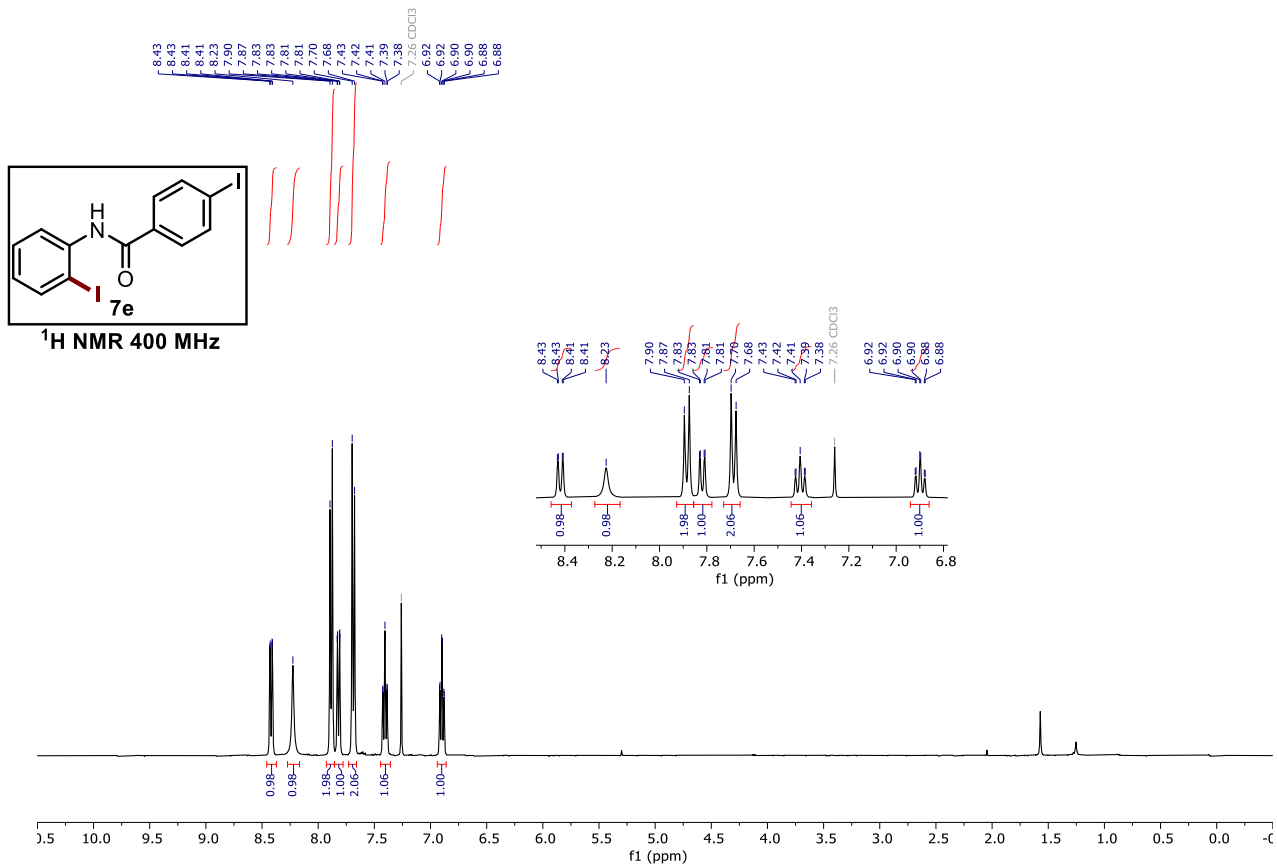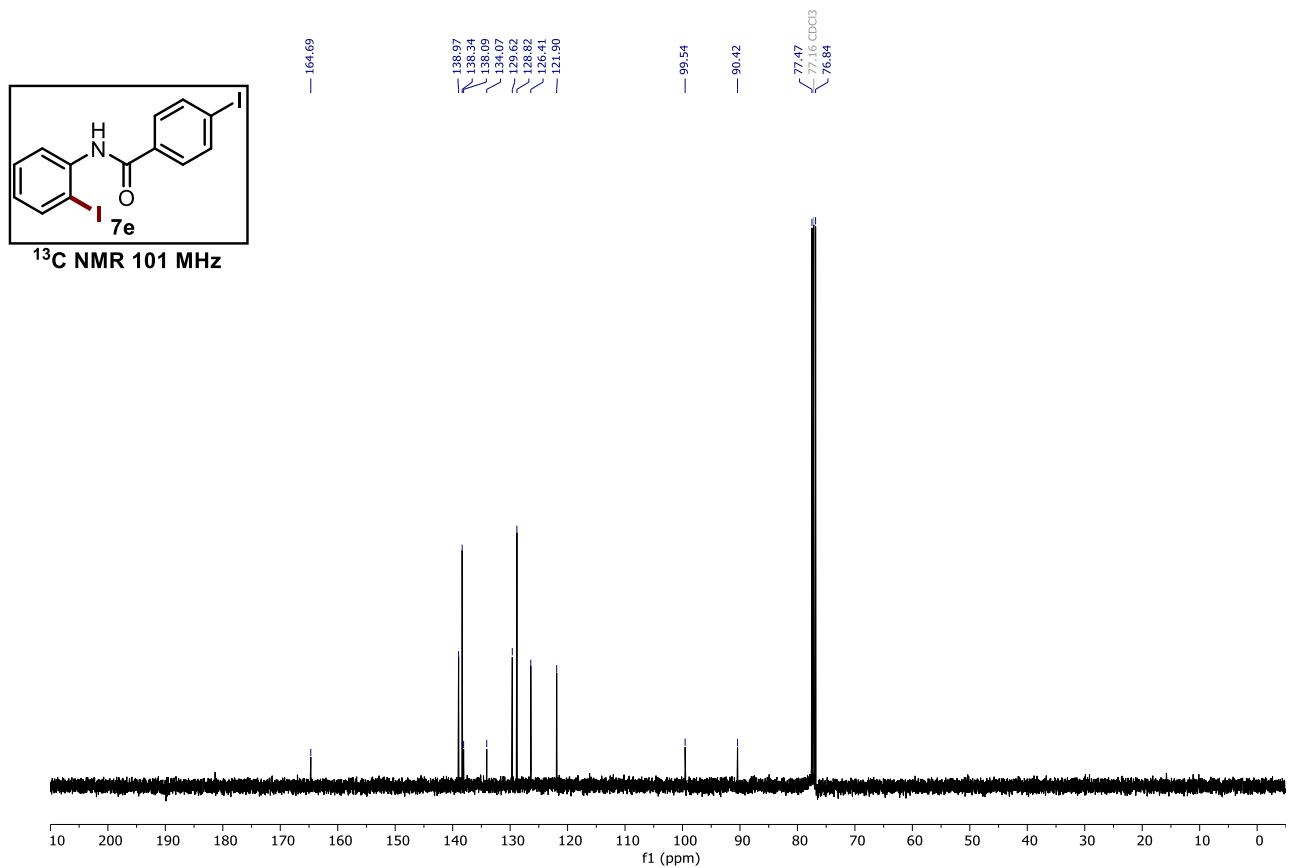

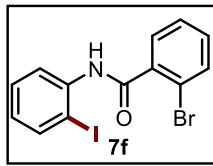

**<sup>1</sup>H NMR 400 MHz**

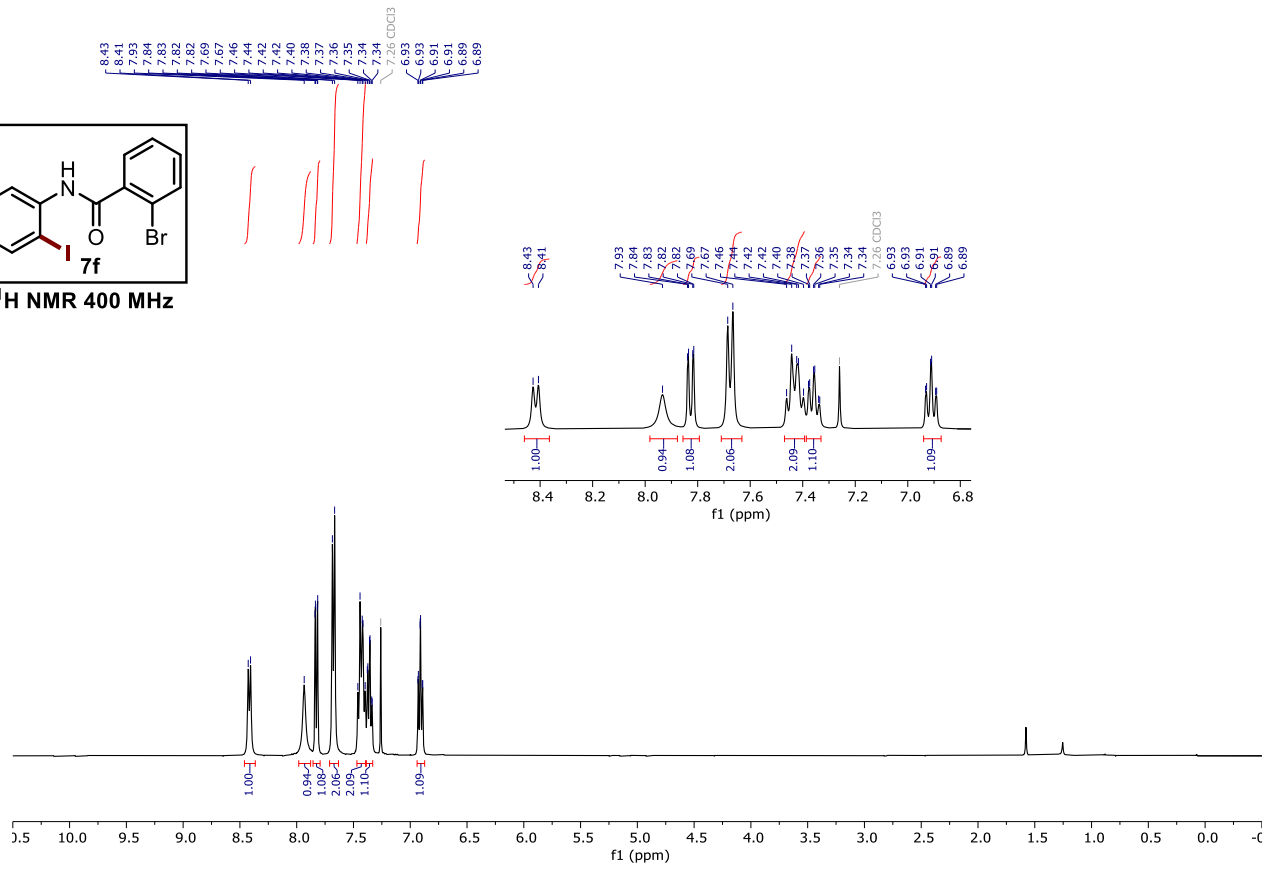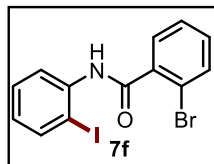

**<sup>13</sup>C NMR 101 MHz**

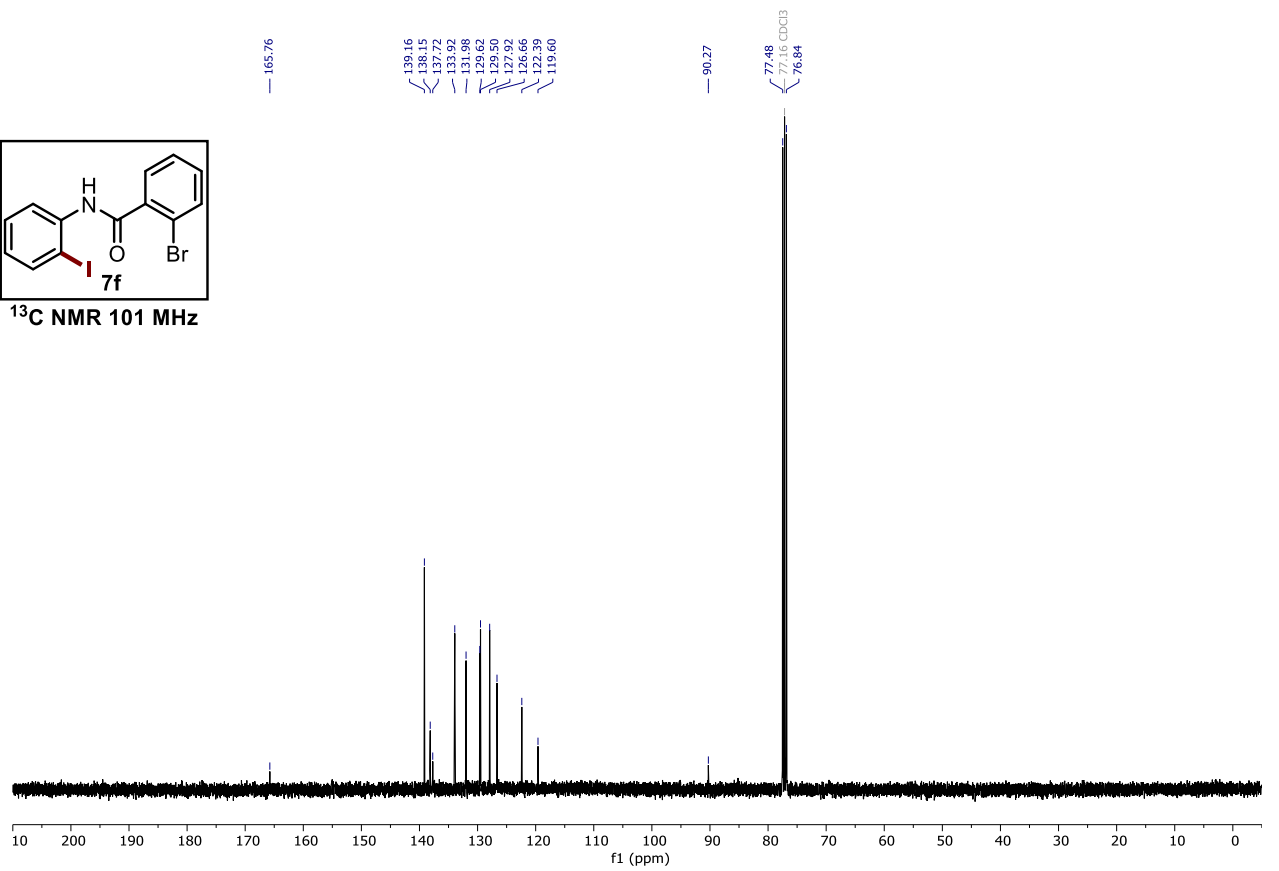

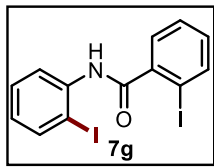

<sup>1</sup>H NMR 400 MHz

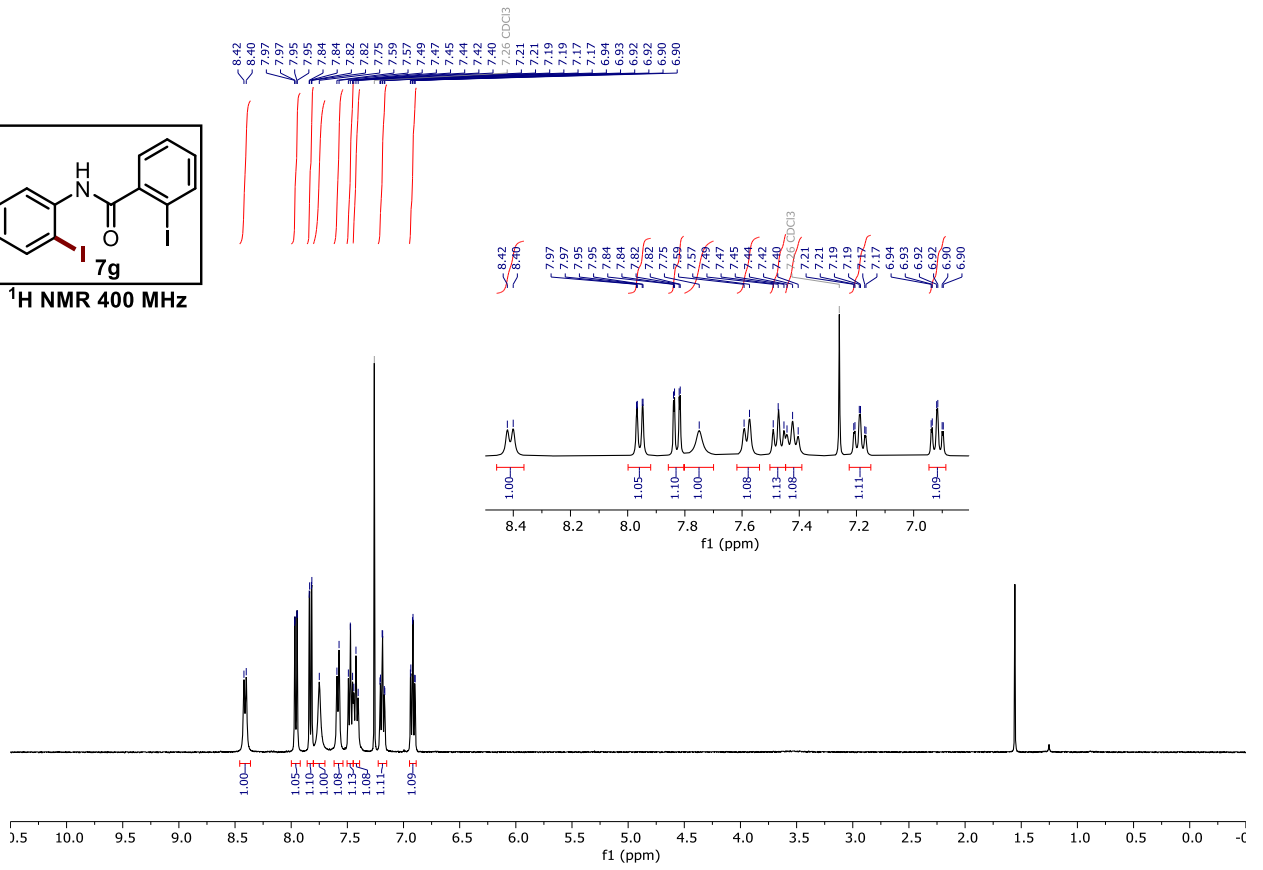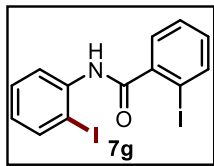

<sup>13</sup>C NMR 101 MHz

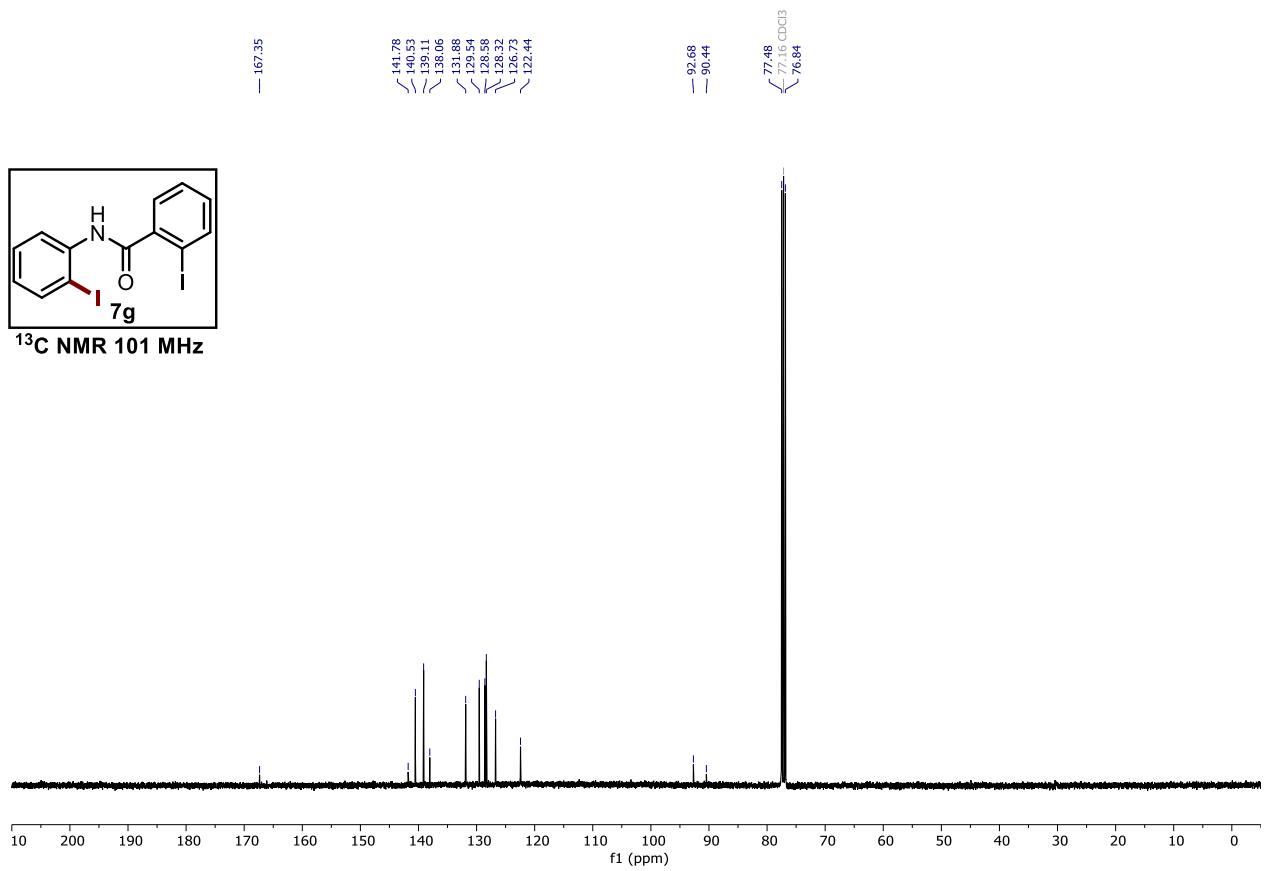

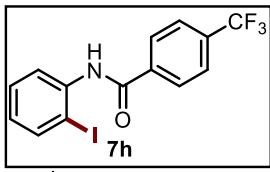

**<sup>1</sup>H NMR 400 MHz**

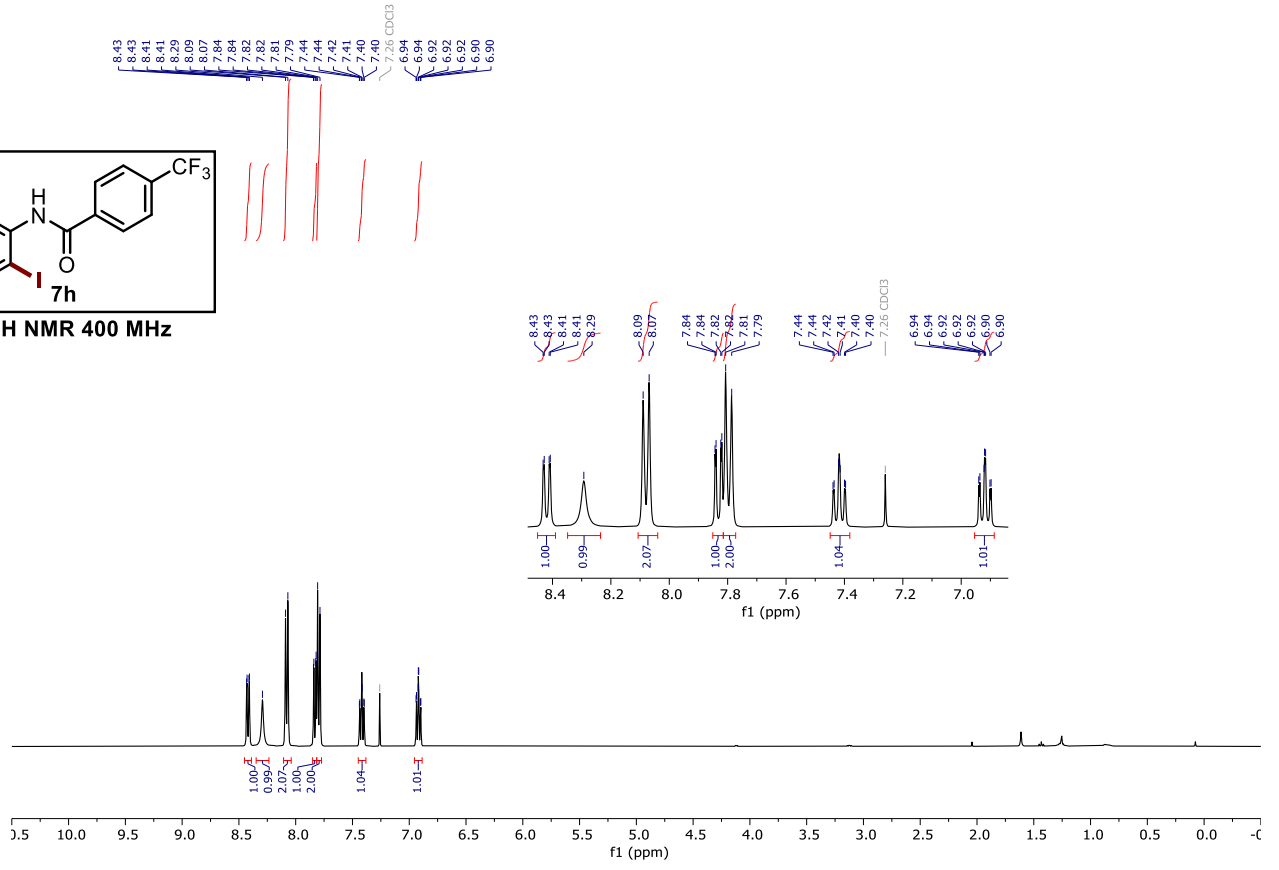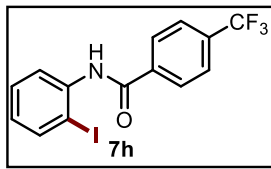

**<sup>13</sup>C NMR 101 MHz**

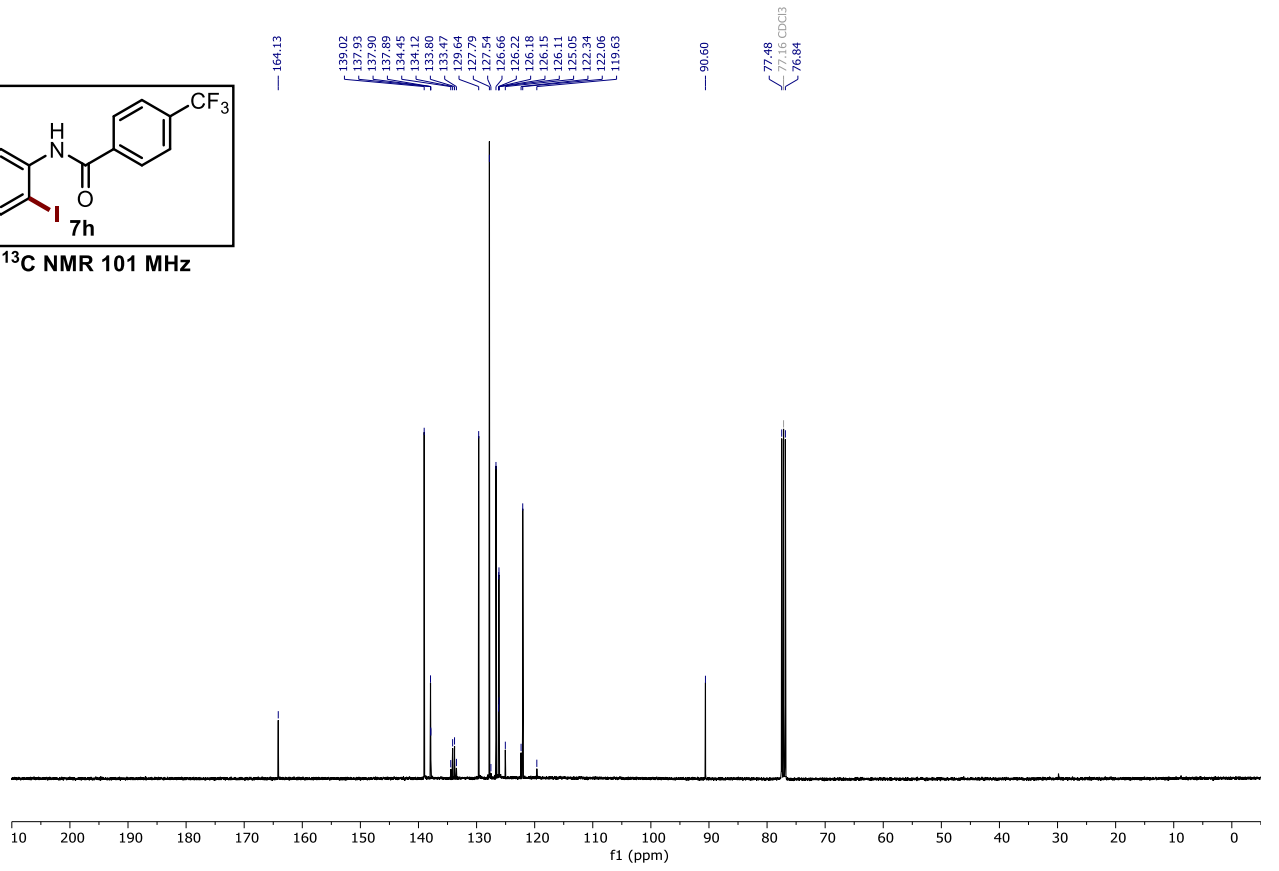

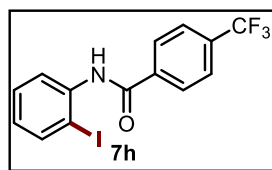

**<sup>19</sup>F NMR 470 MHz**

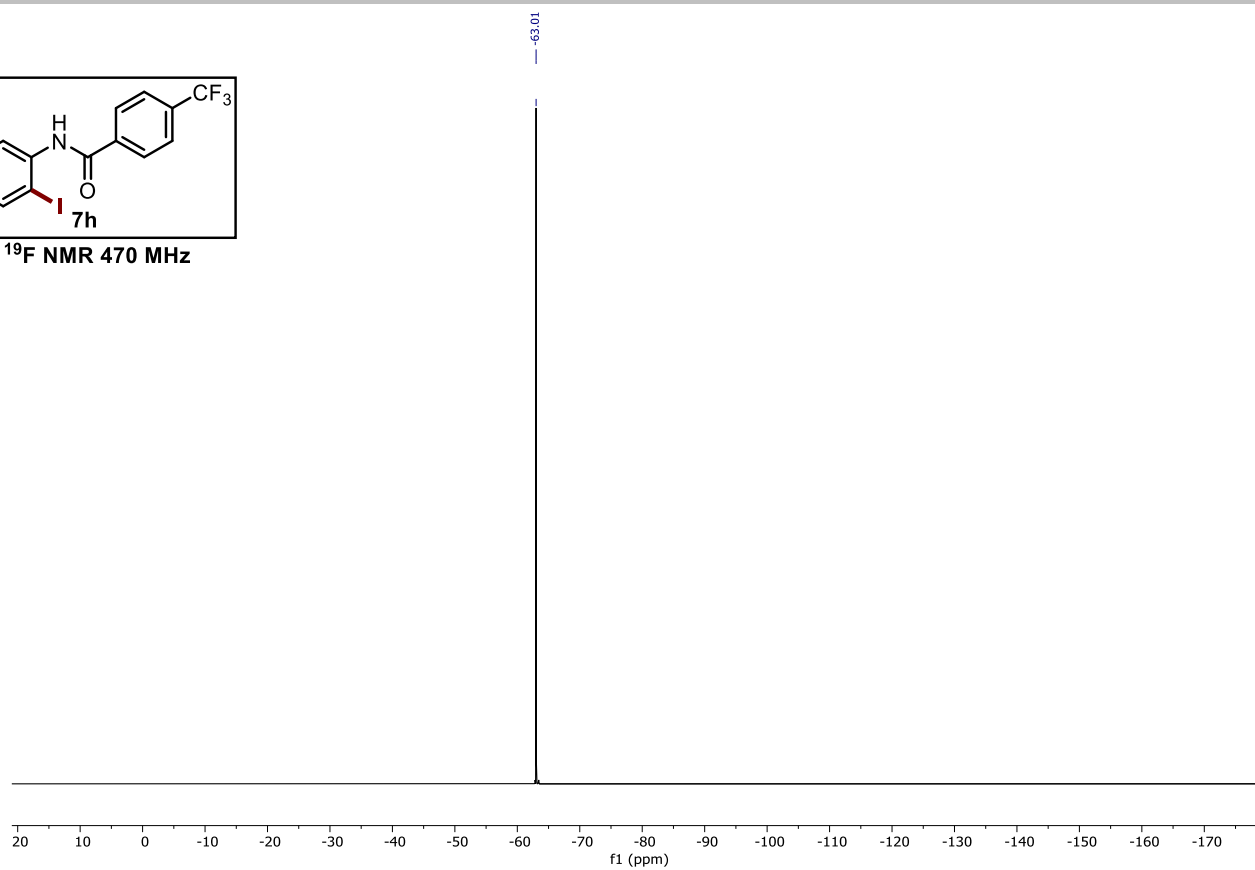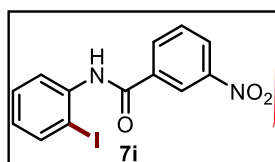

**<sup>1</sup>H NMR 400 MHz**

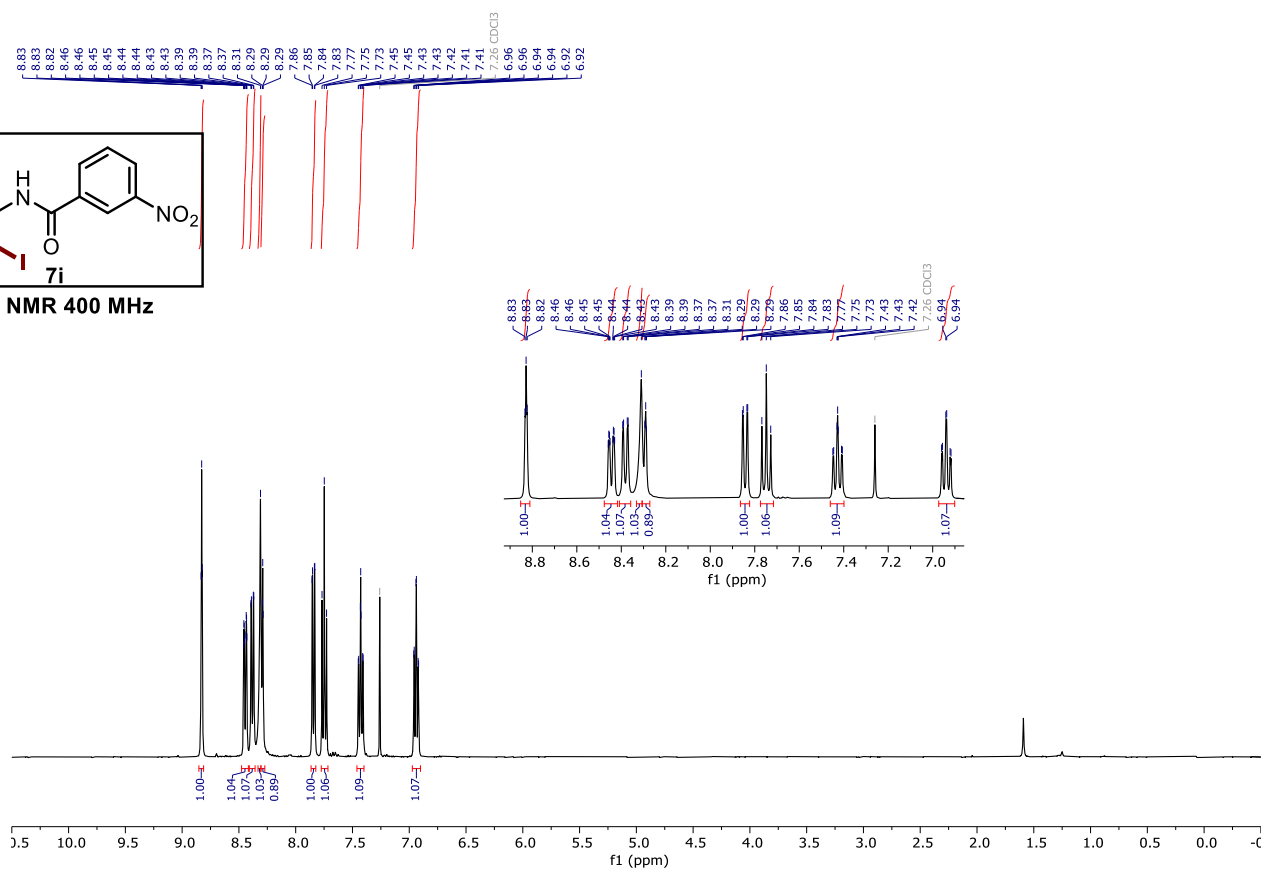

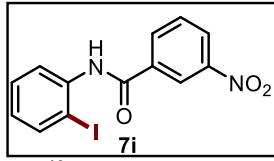

<sup>13</sup>C NMR 101 MHz

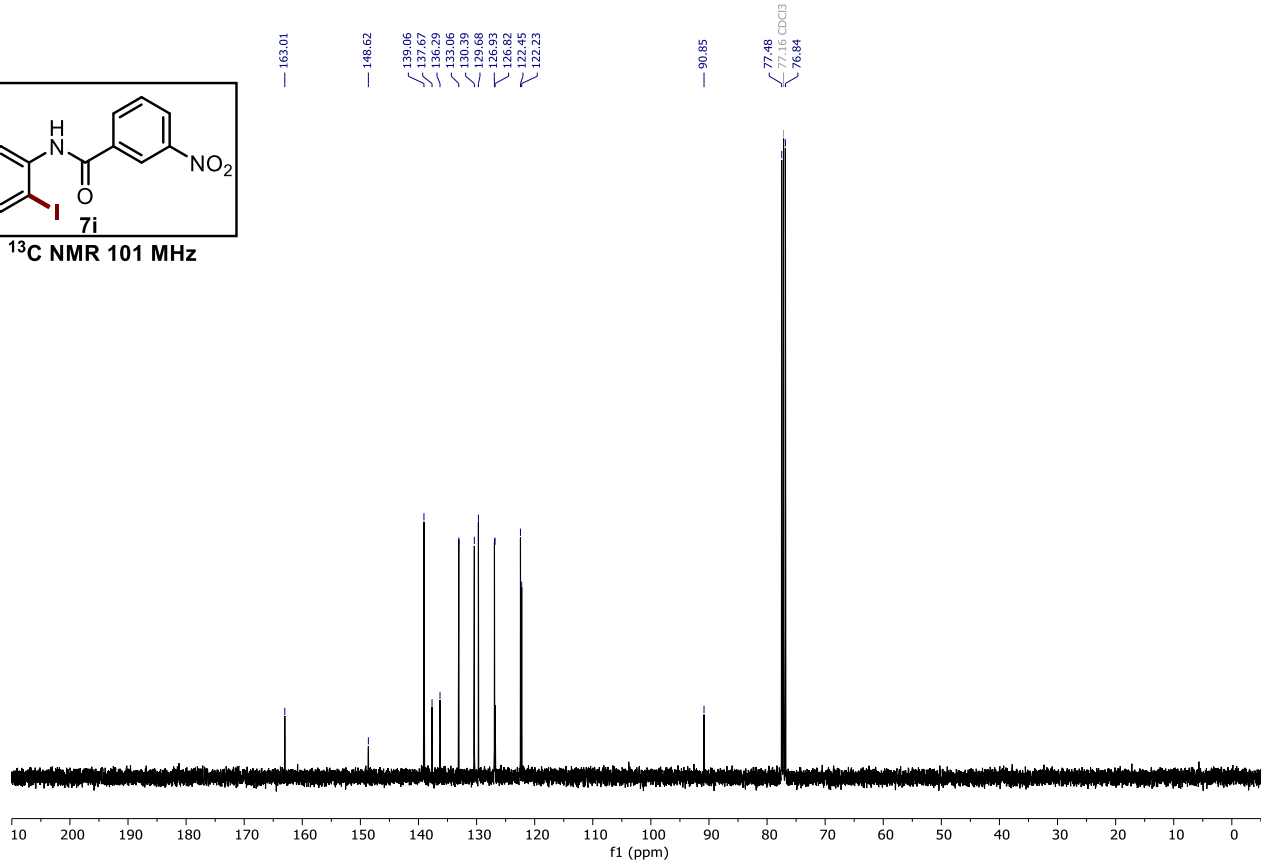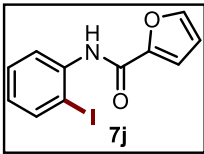

<sup>1</sup>H NMR 400 MHz

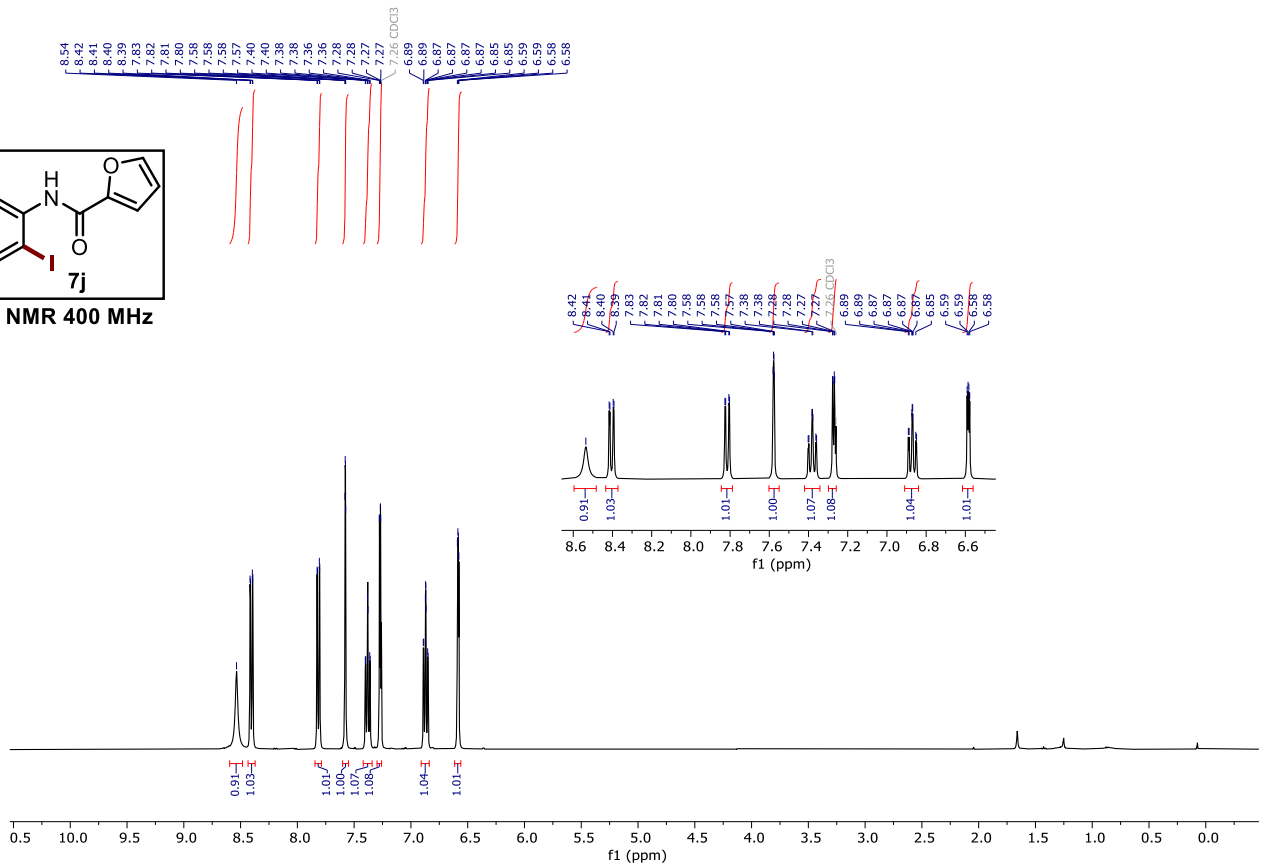

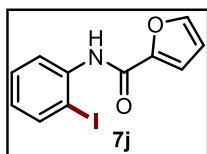

**7j**  
<sup>13</sup>C NMR 101 MHz

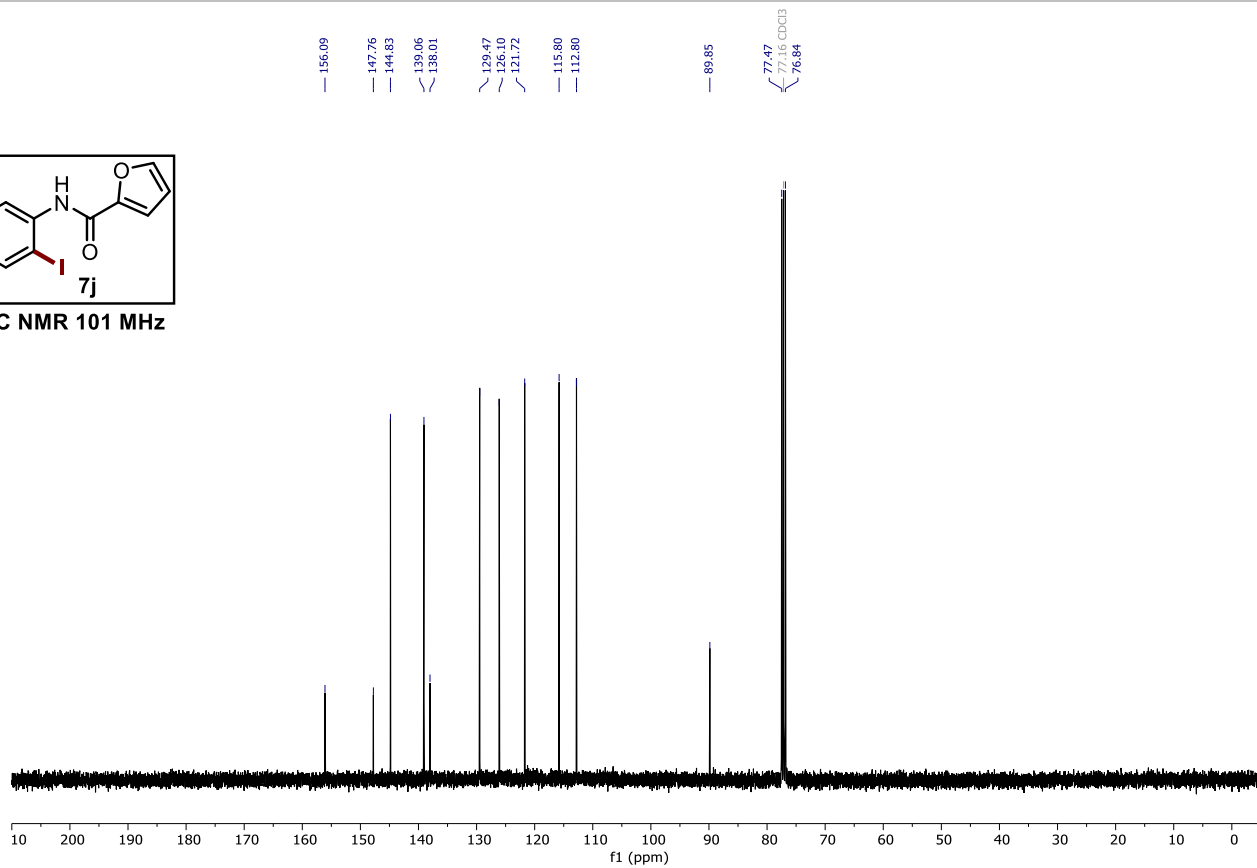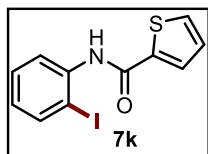

**7k**  
<sup>1</sup>H NMR 400 MHz

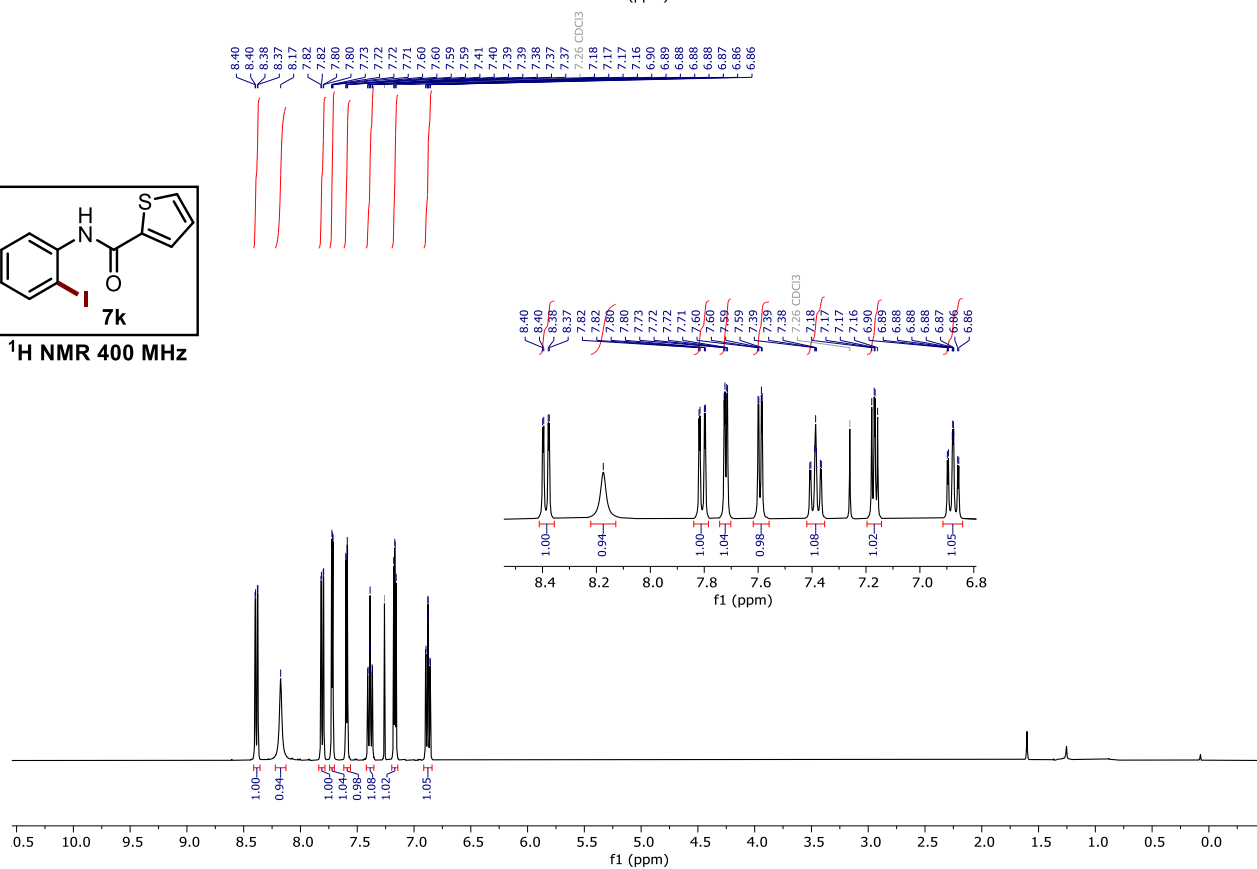

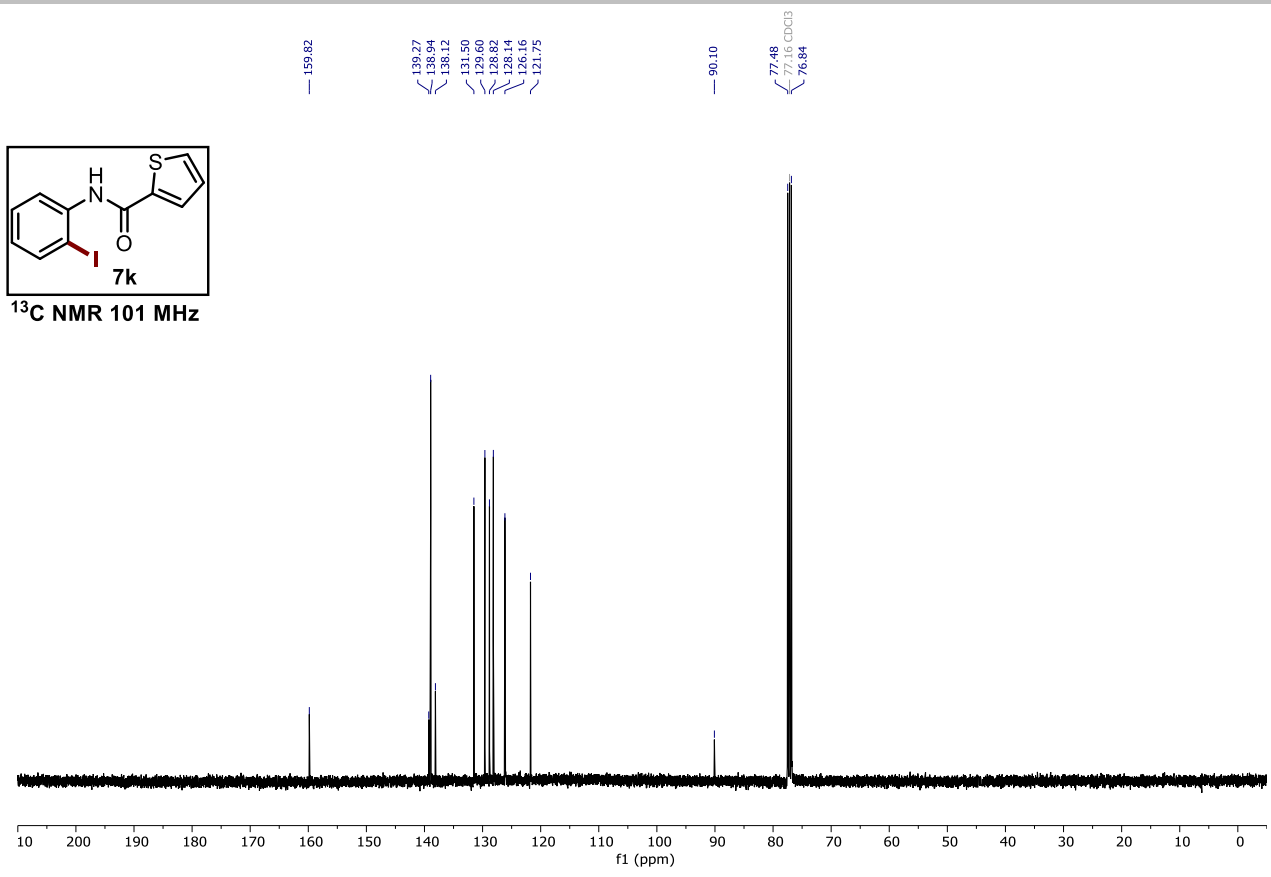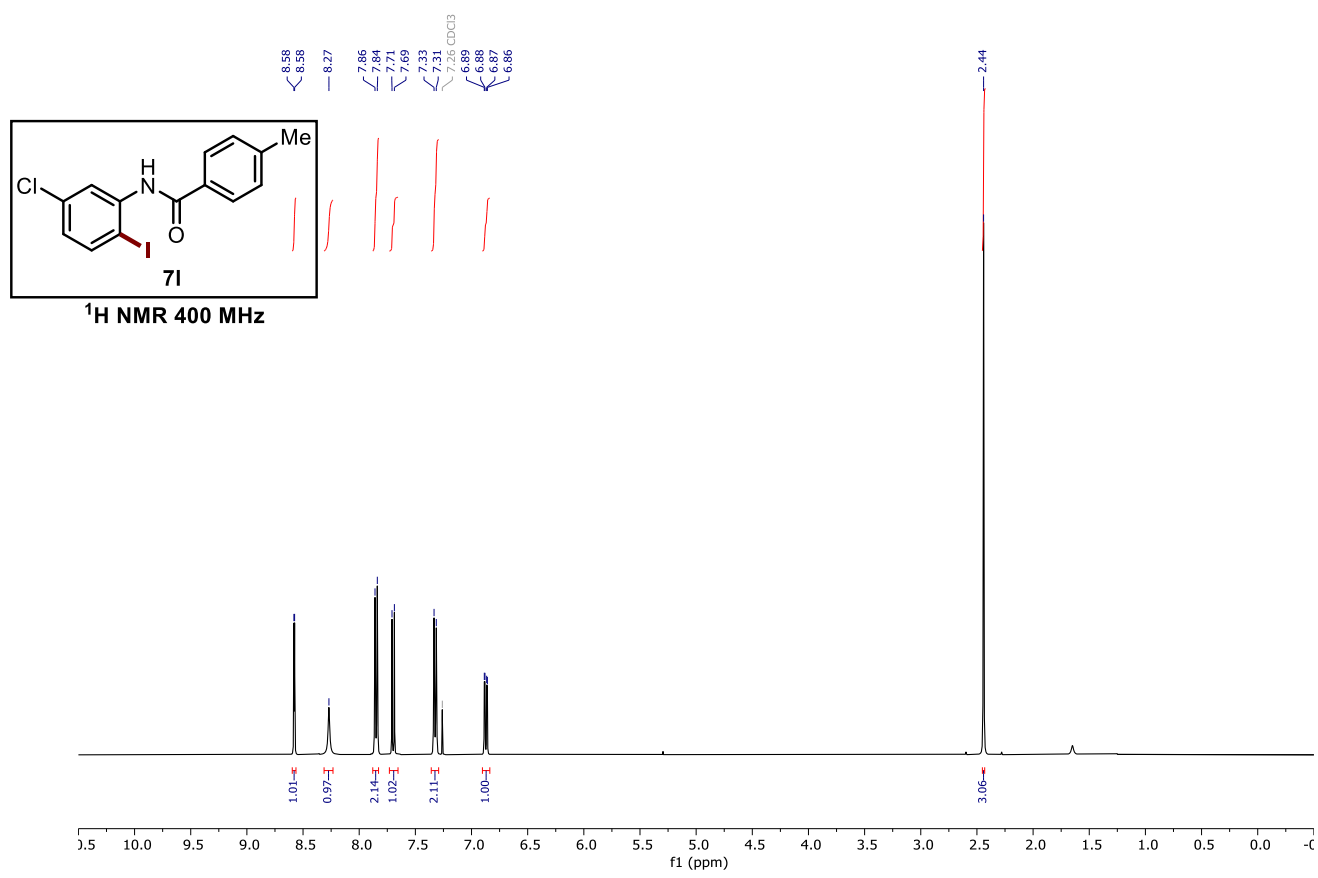



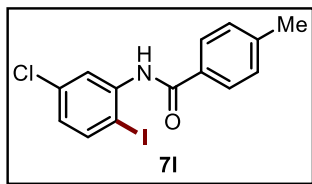

<sup>13</sup>C NMR 101 MHz

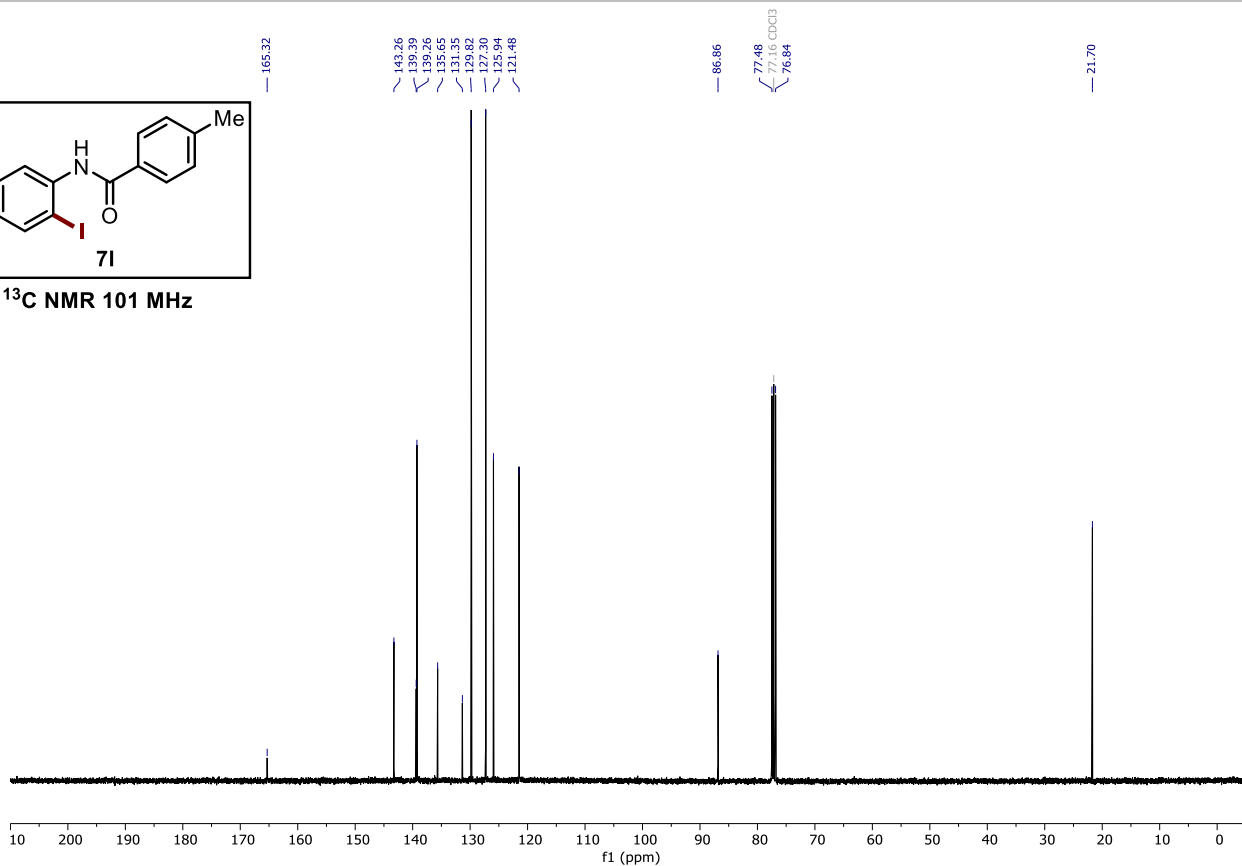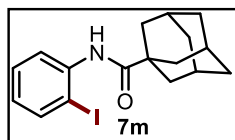

<sup>1</sup>H NMR 400 MHz

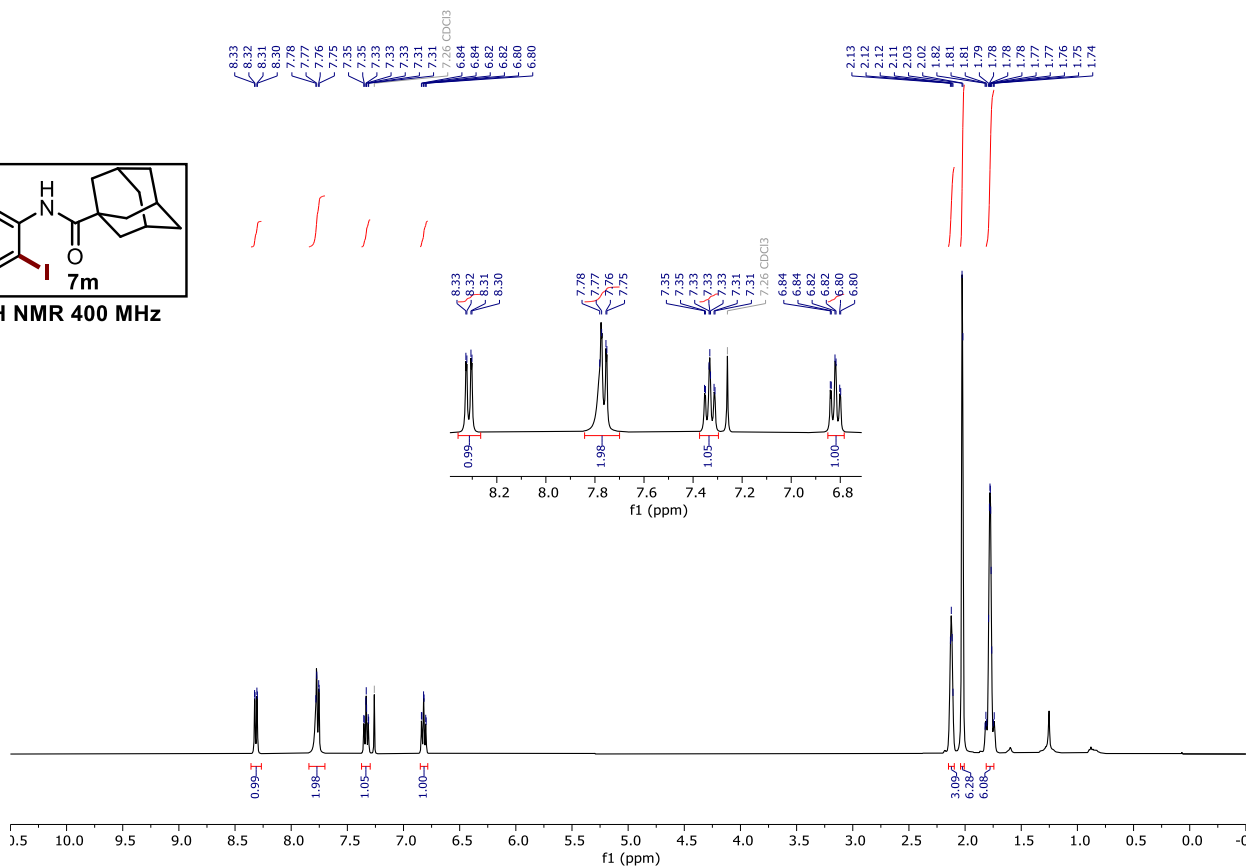

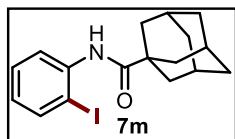

<sup>13</sup>C NMR 101 MHz

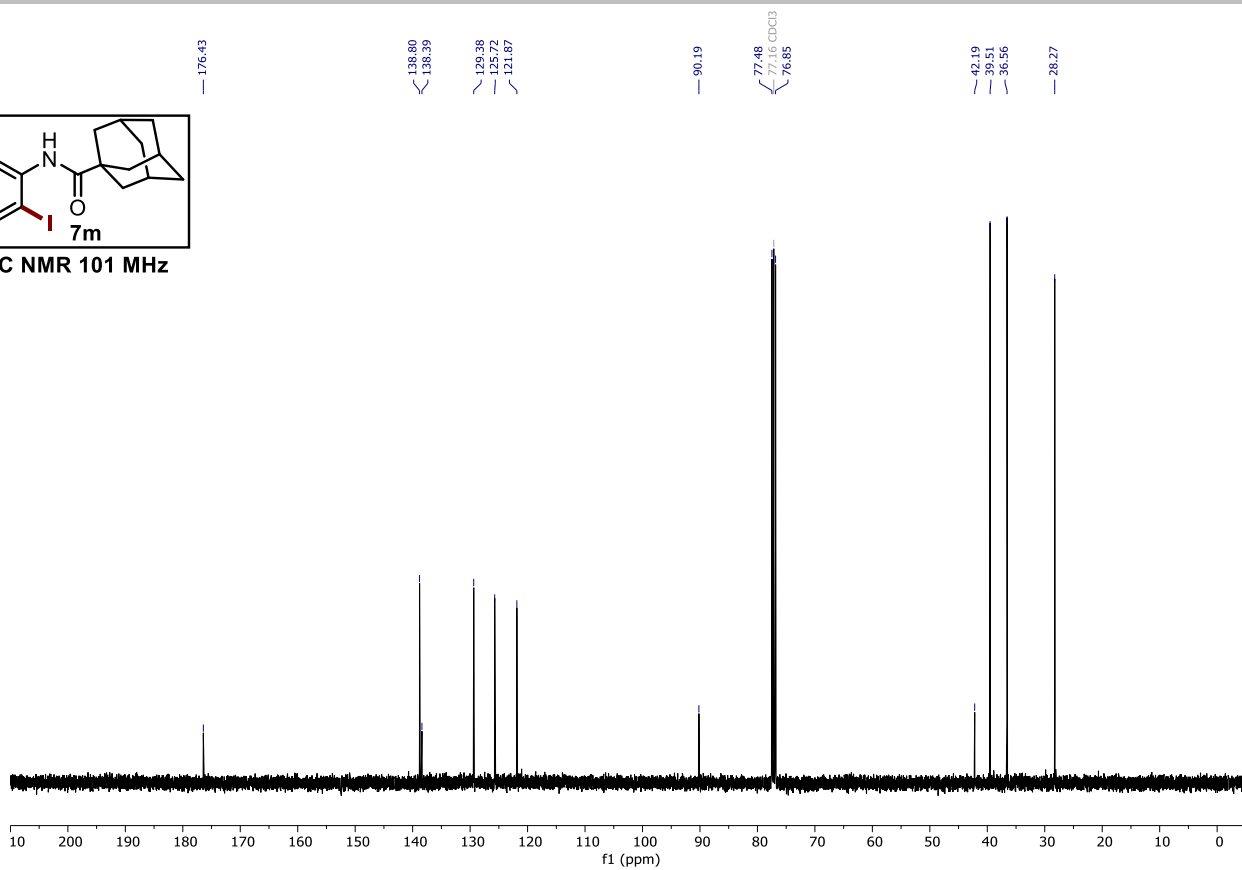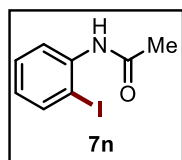

<sup>1</sup>H NMR 400 MHz

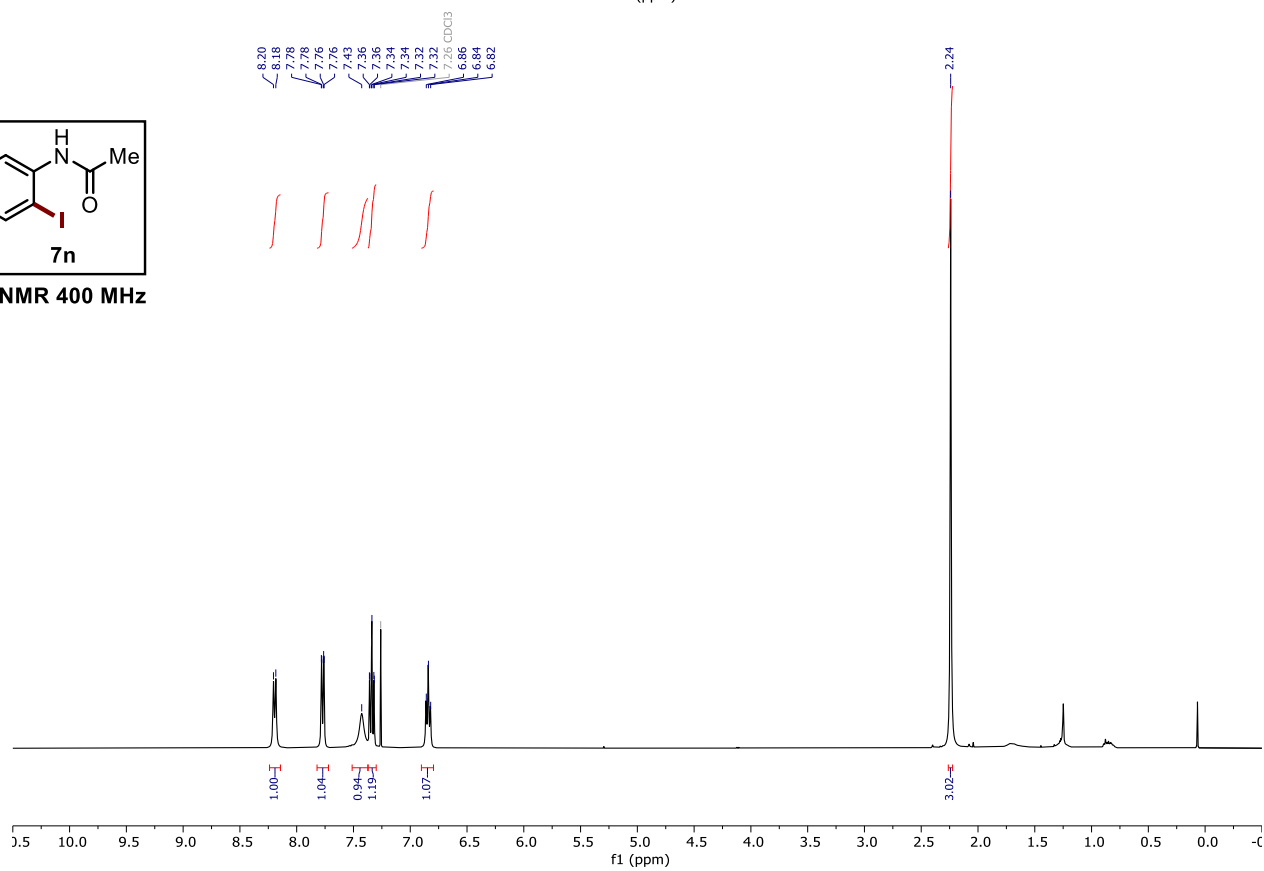

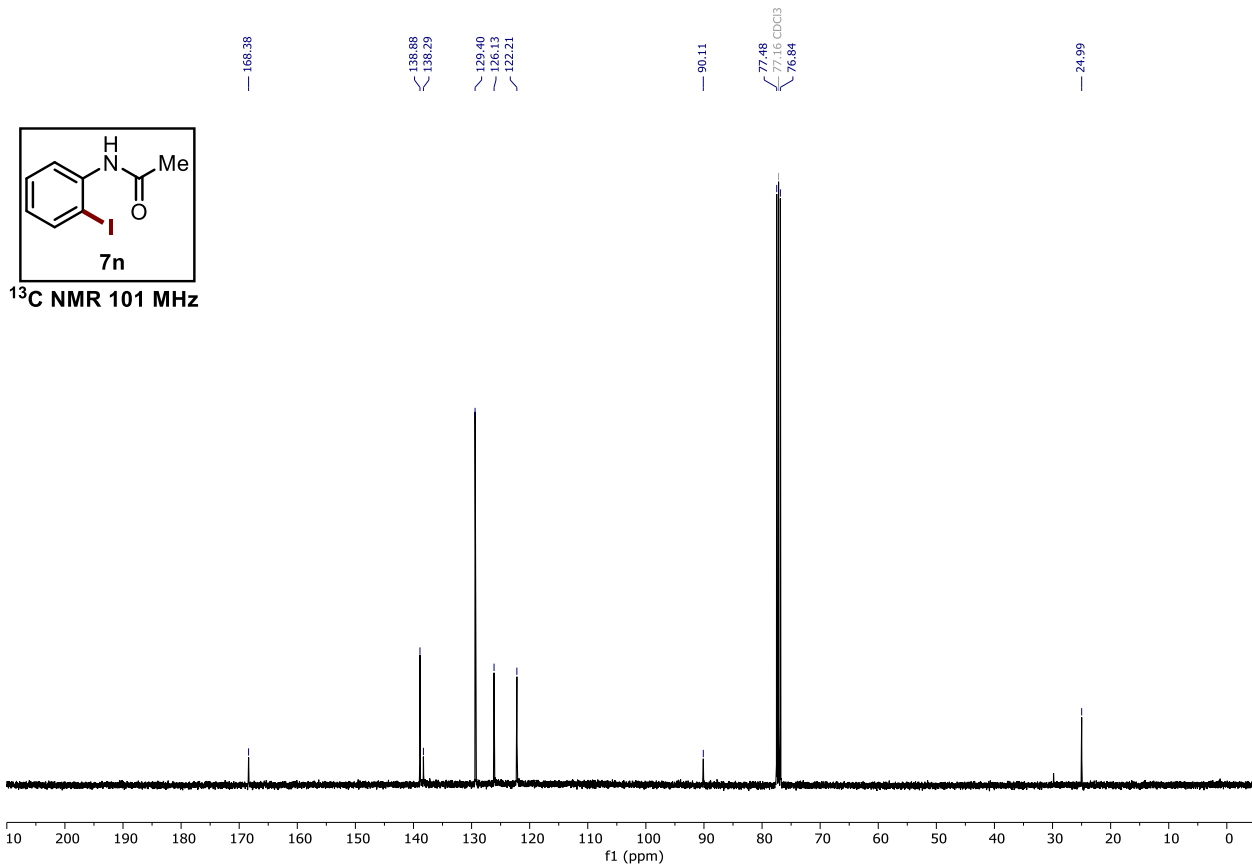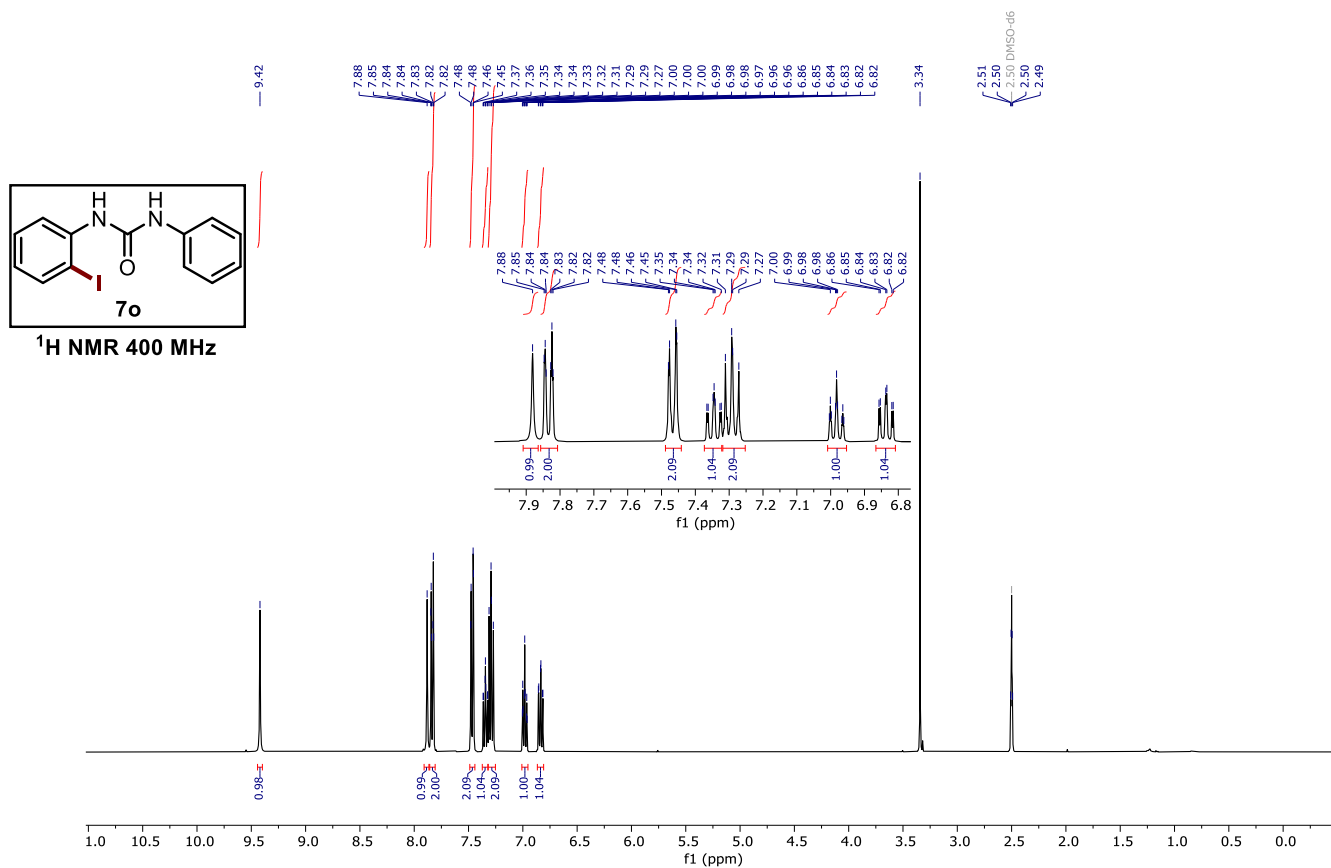

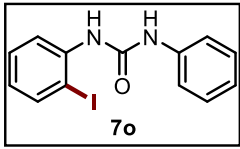

<sup>13</sup>C NMR 101 MHz

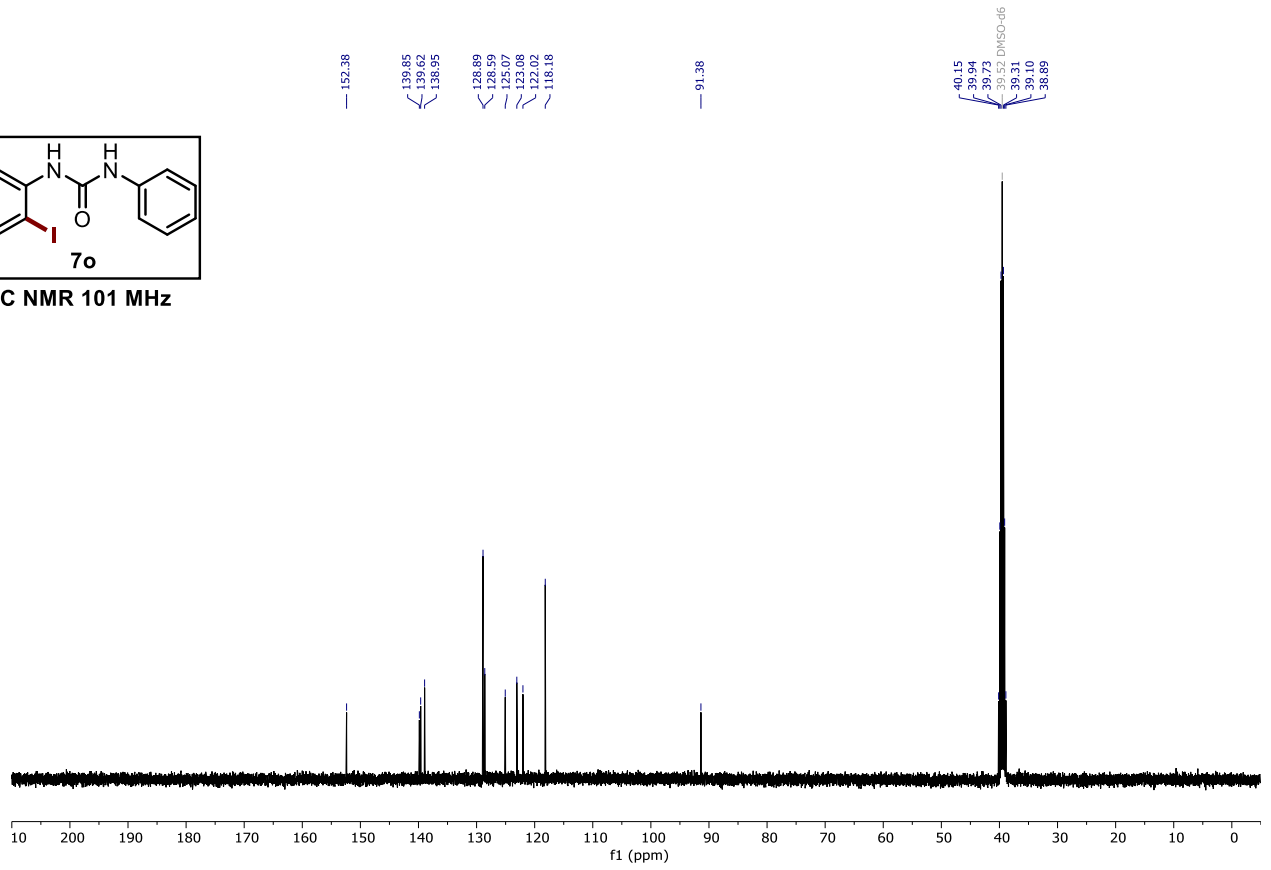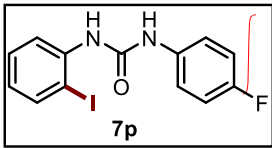

<sup>1</sup>H NMR 400 MHz

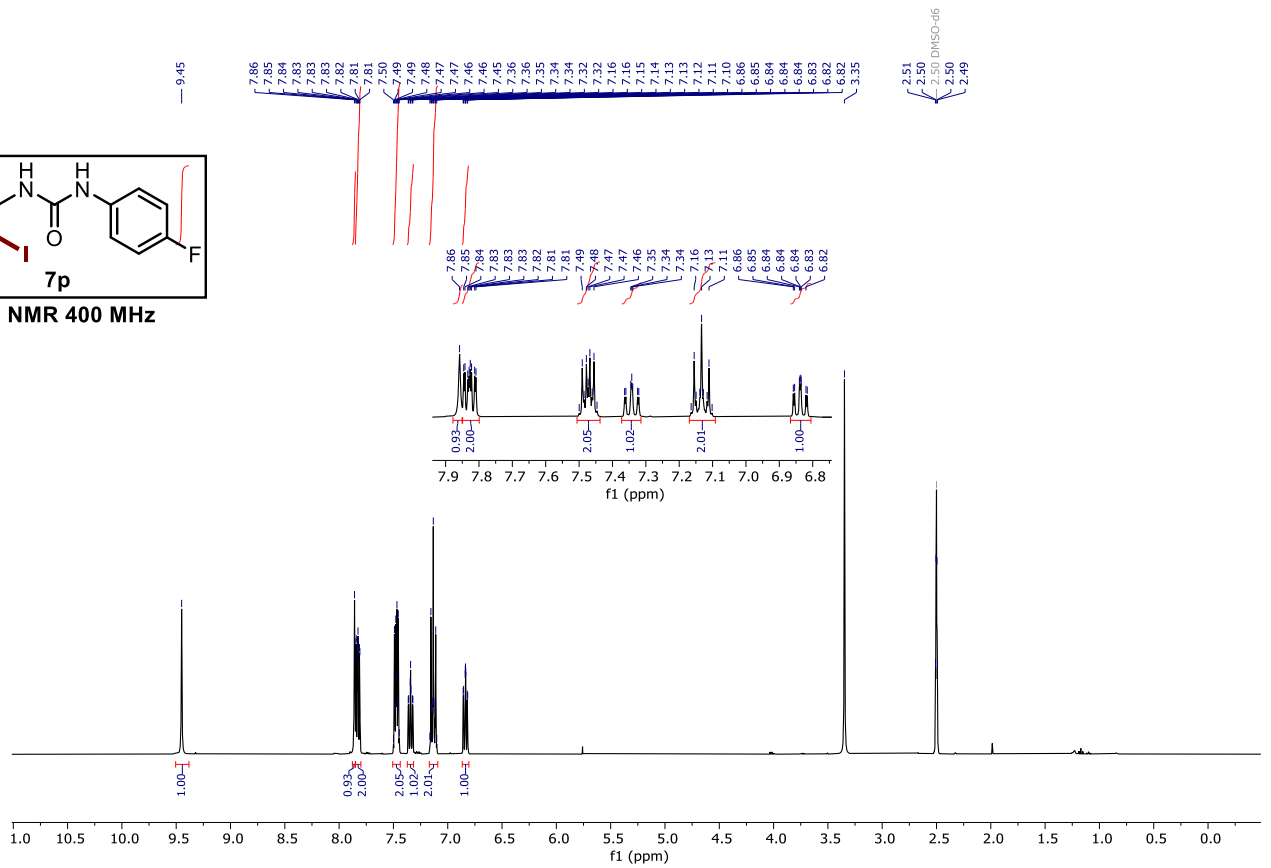

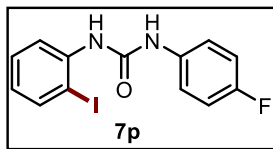

<sup>13</sup>C NMR 101 MHz

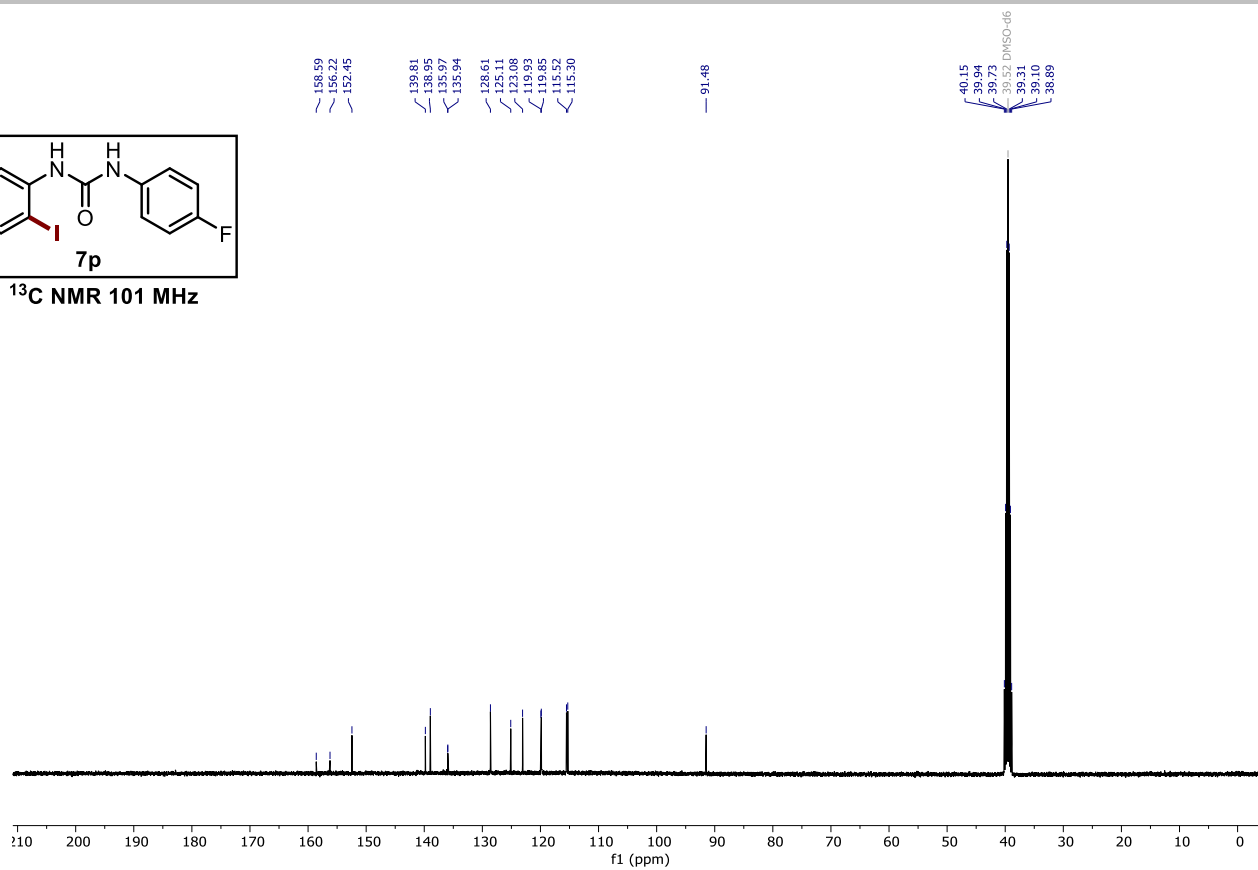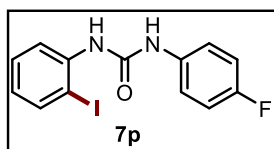

<sup>19</sup>F NMR 470 MHz

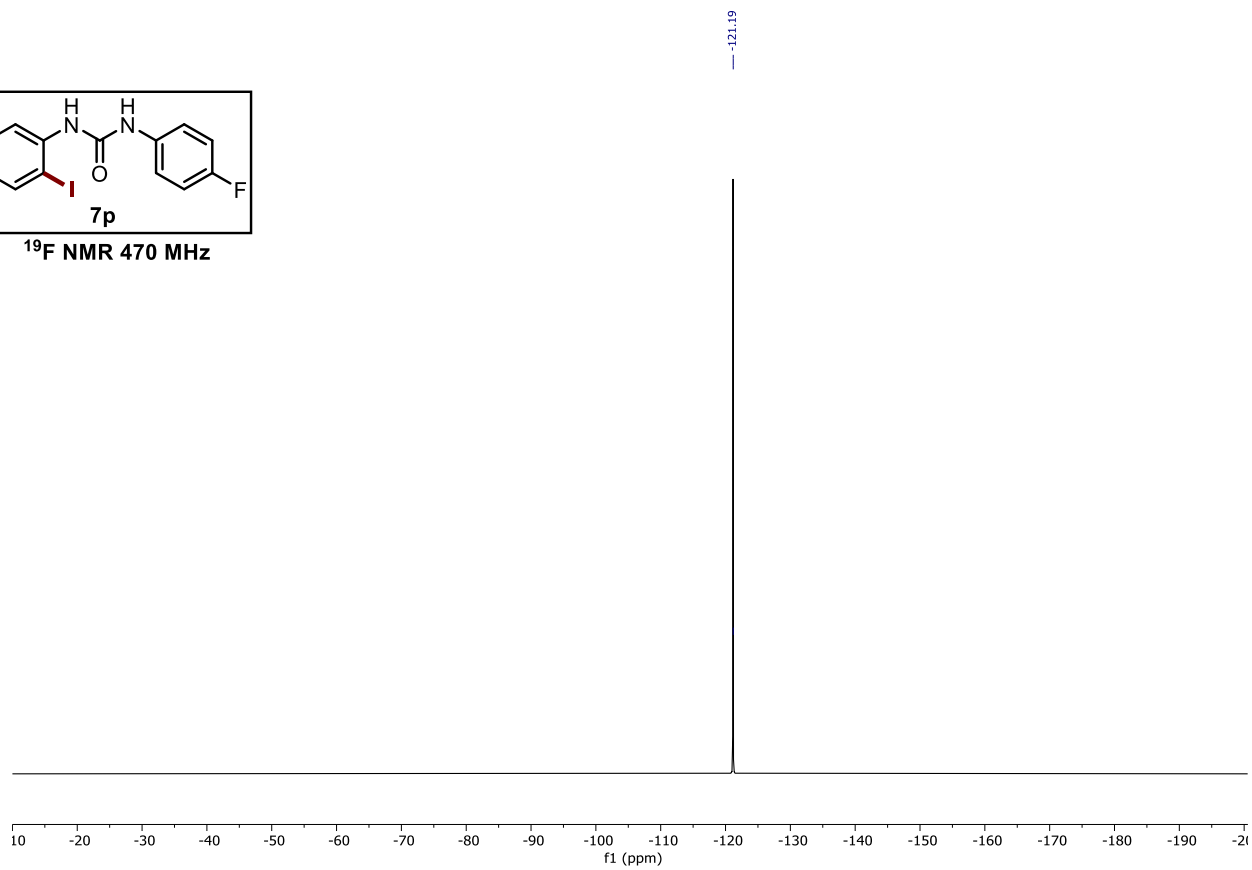

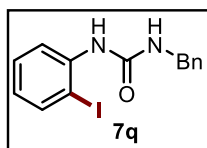

<sup>1</sup>H NMR 400 MHz

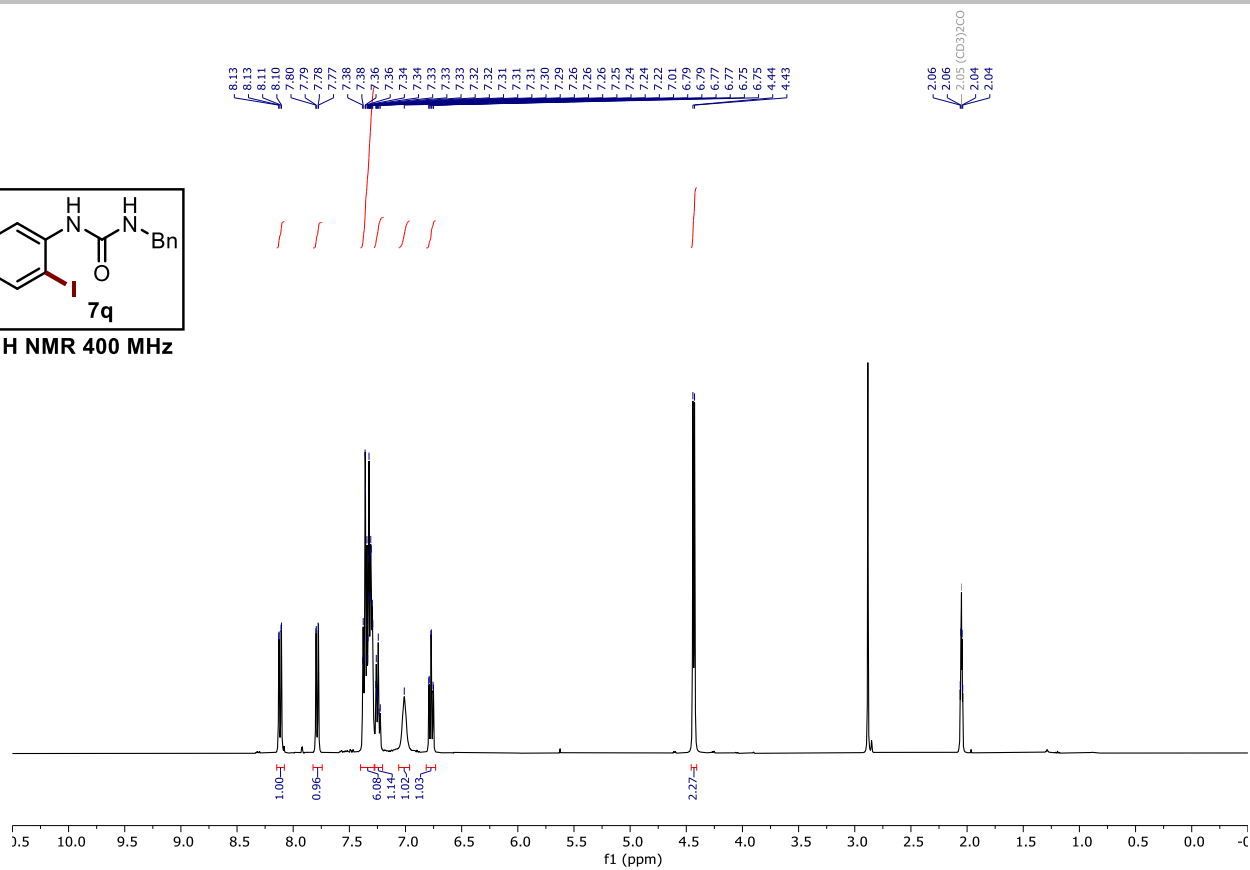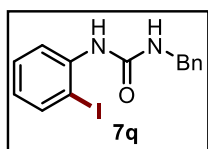

<sup>13</sup>C NMR 101 MHz

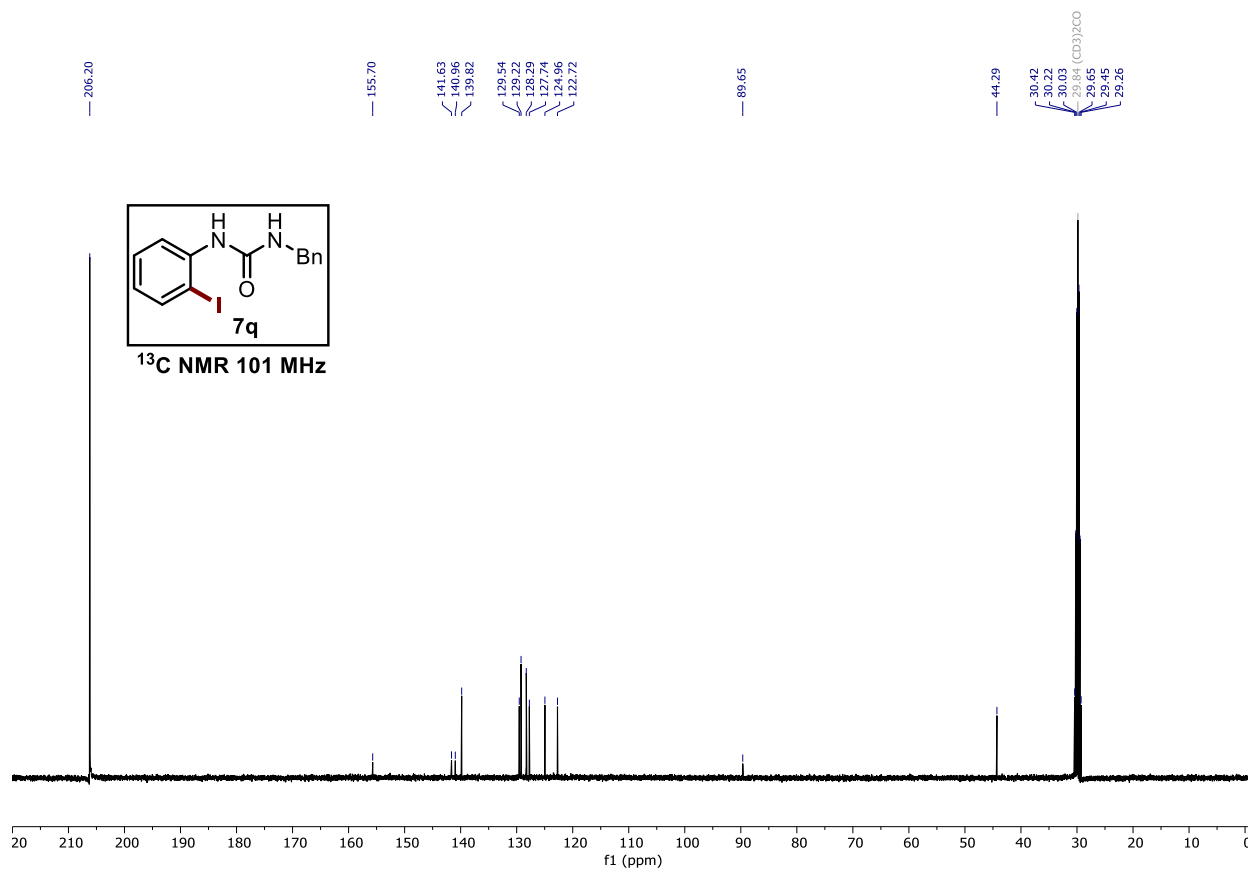

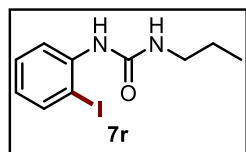

**<sup>1</sup>H NMR 400 MHz**

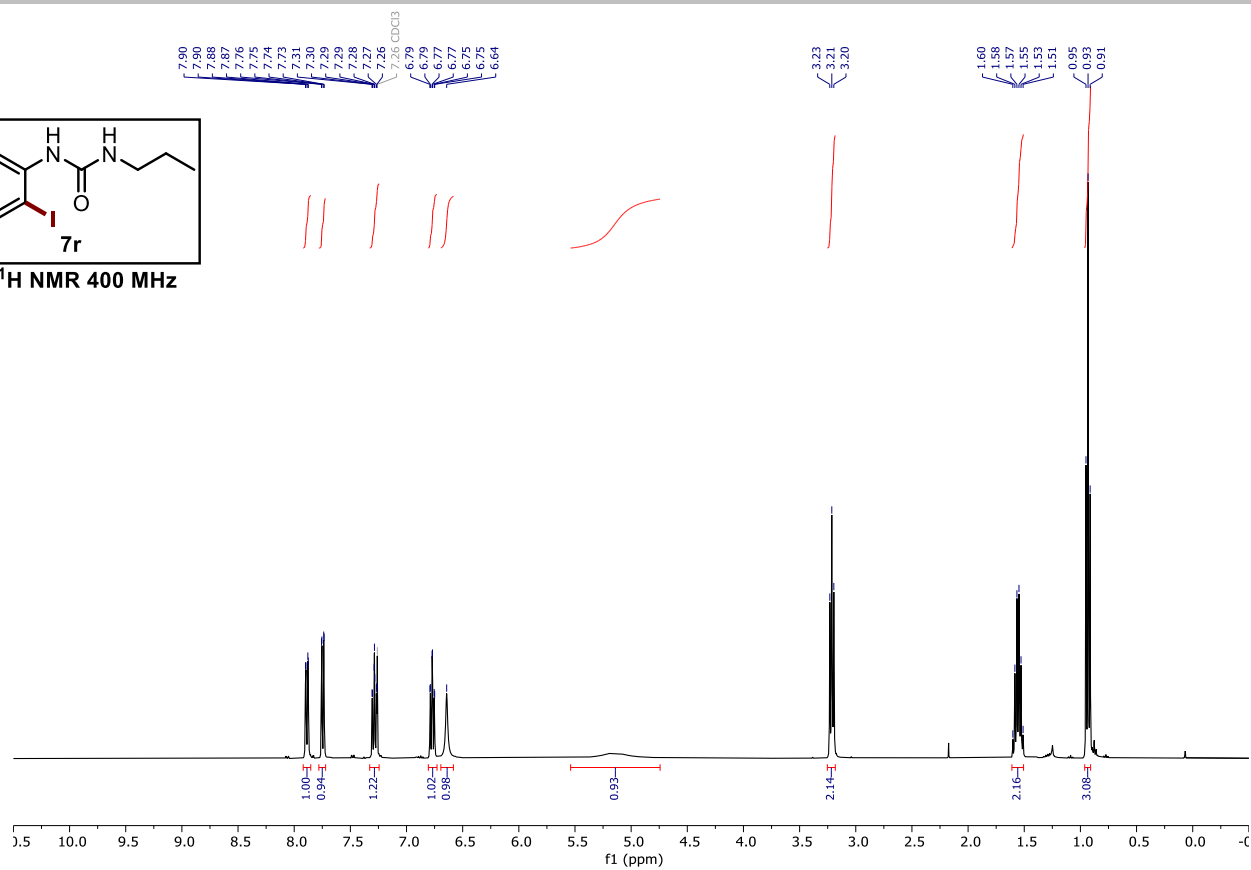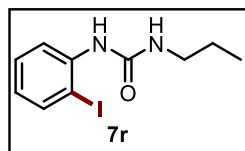

**<sup>13</sup>C NMR 101 MHz**

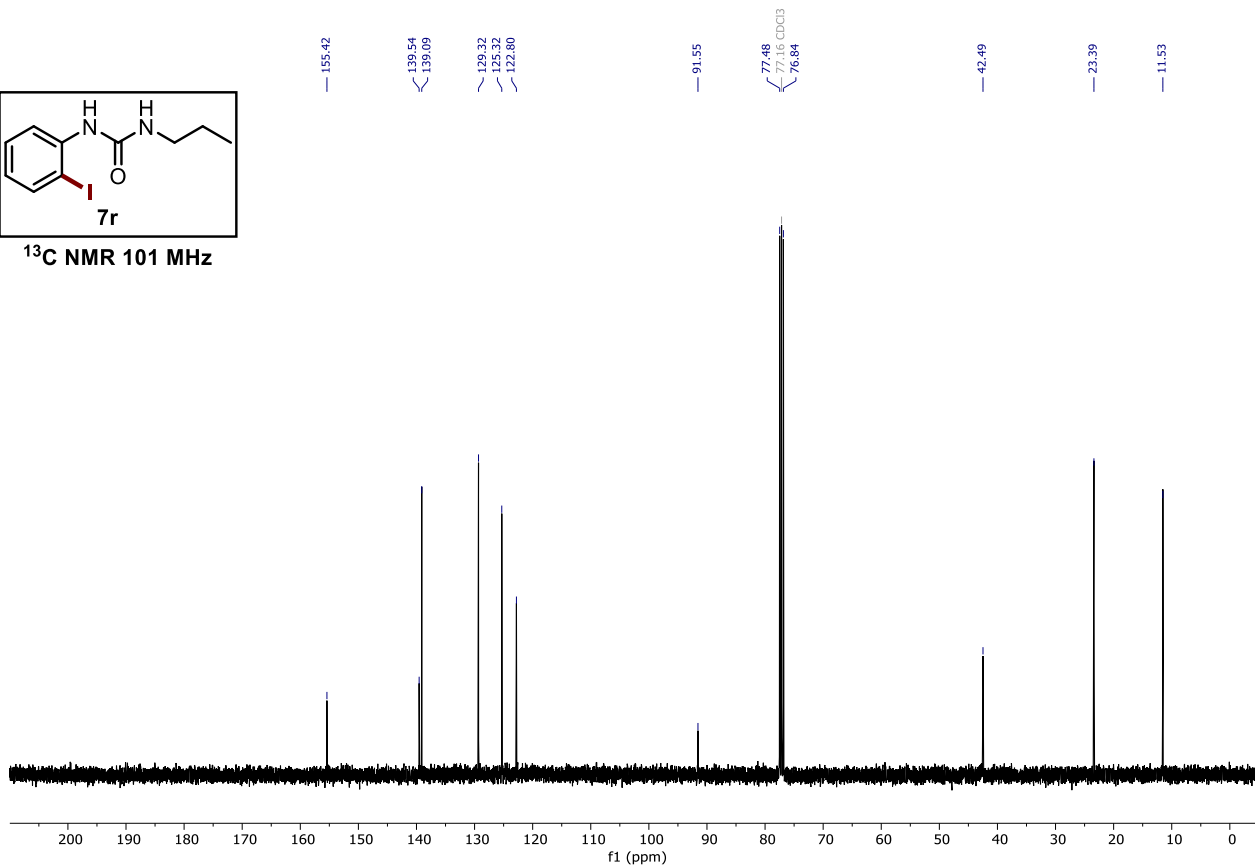

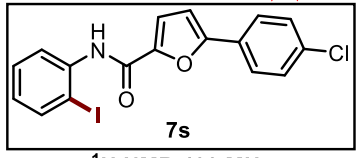

<sup>1</sup>H NMR 400 MHz

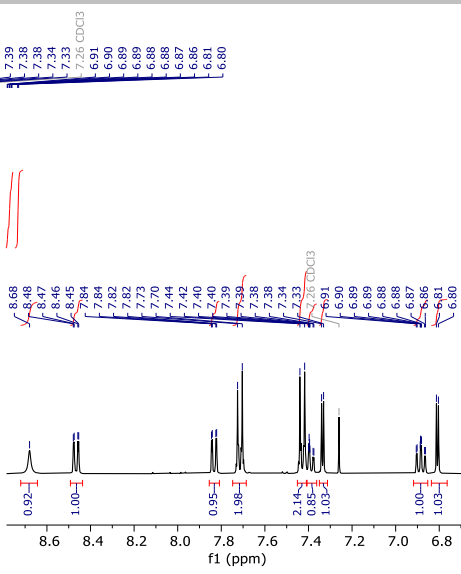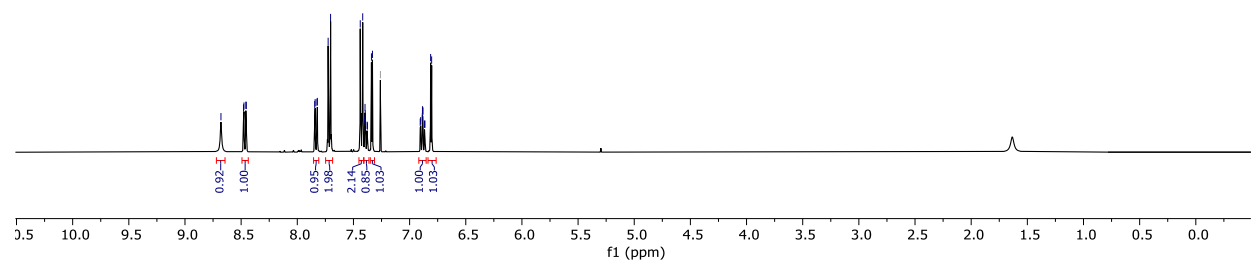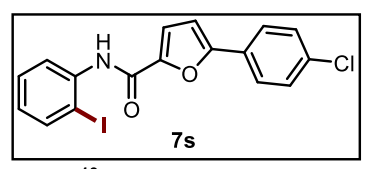

<sup>13</sup>C NMR 101 MHz

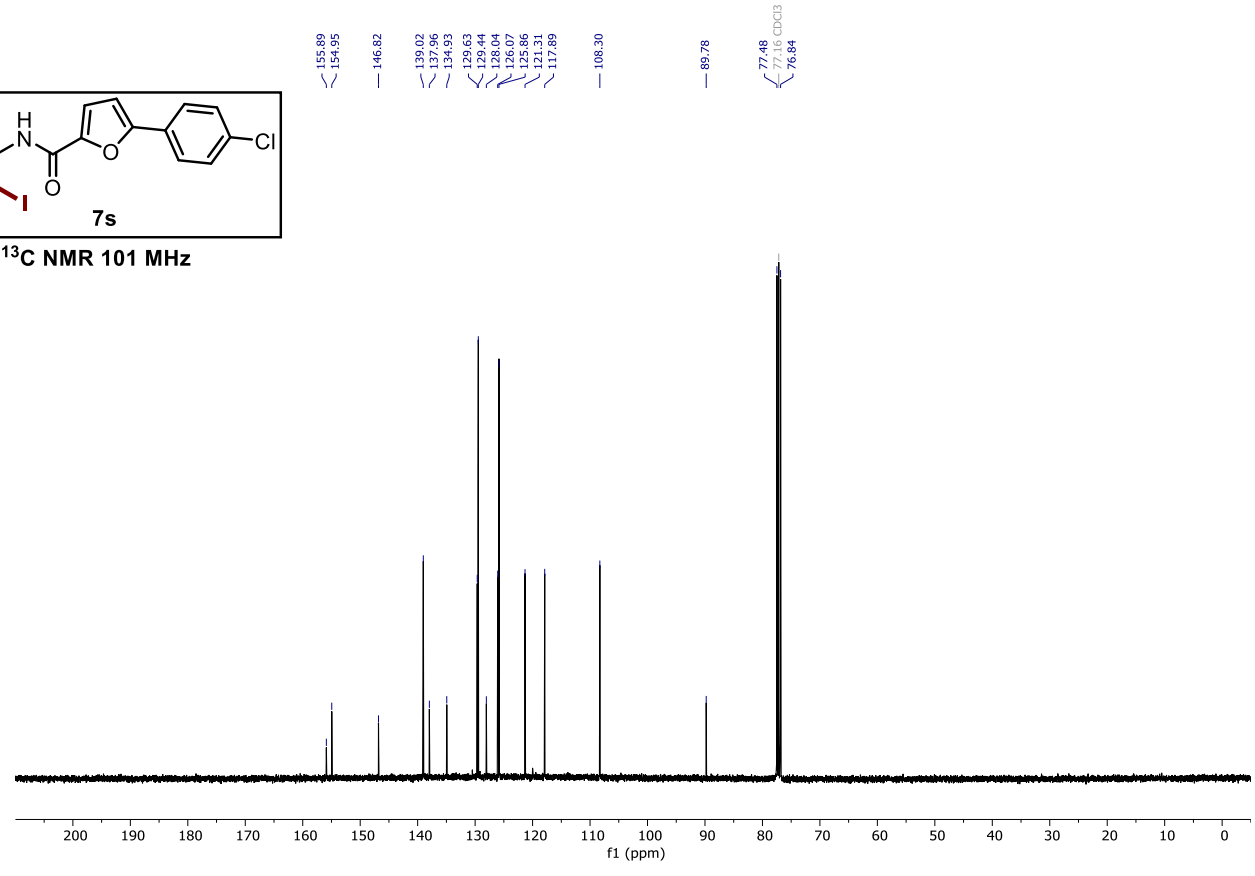



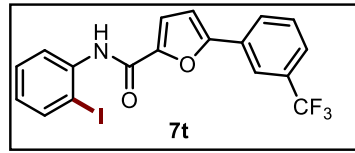

<sup>1</sup>H NMR 400 MHz

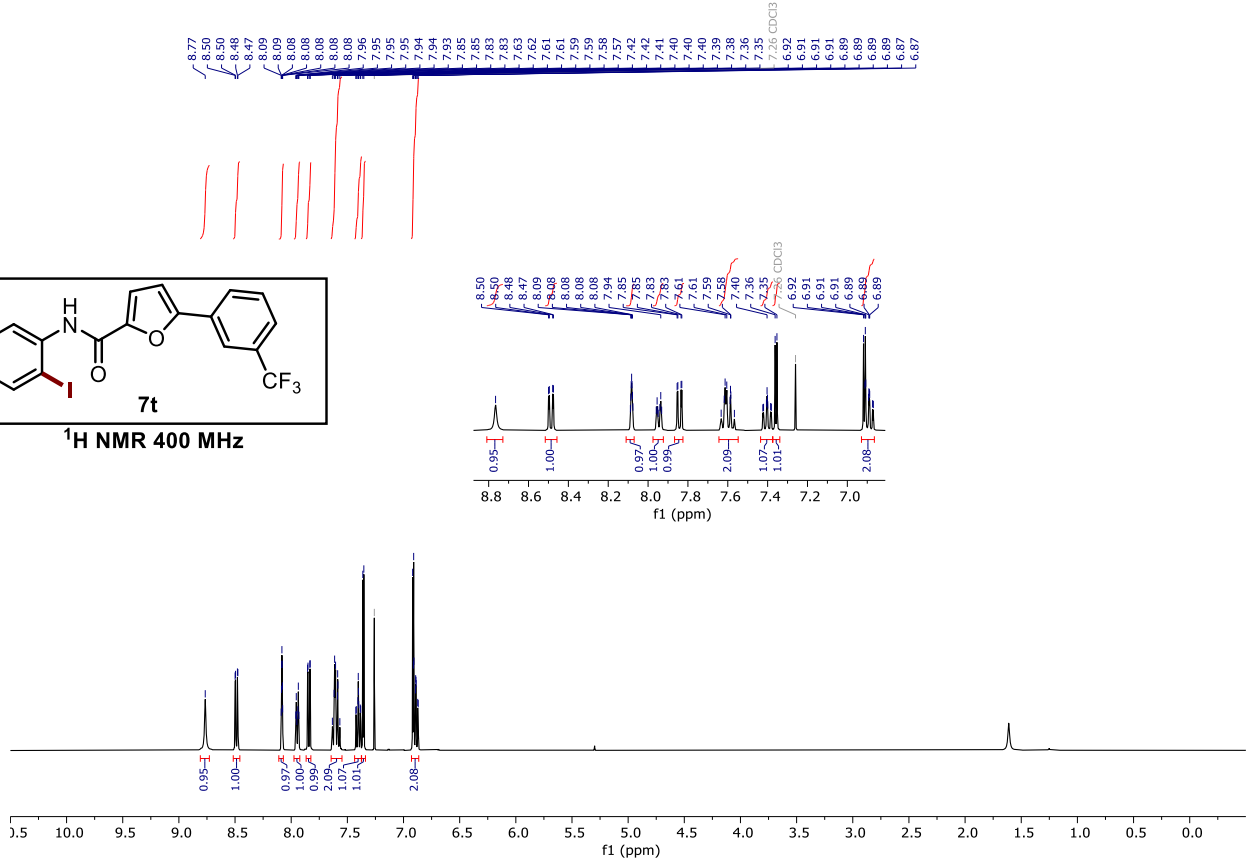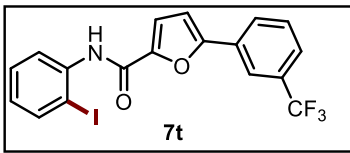

<sup>13</sup>C NMR 101 MHz

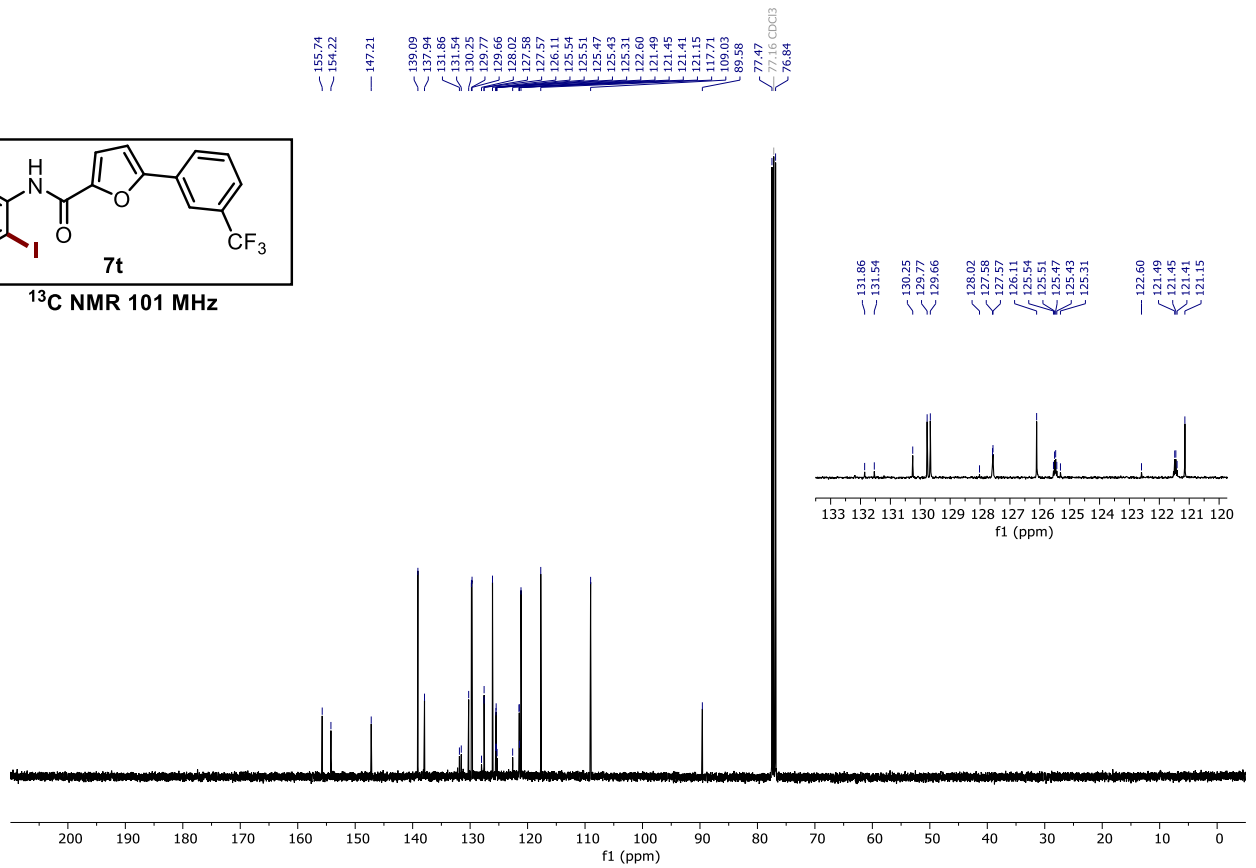

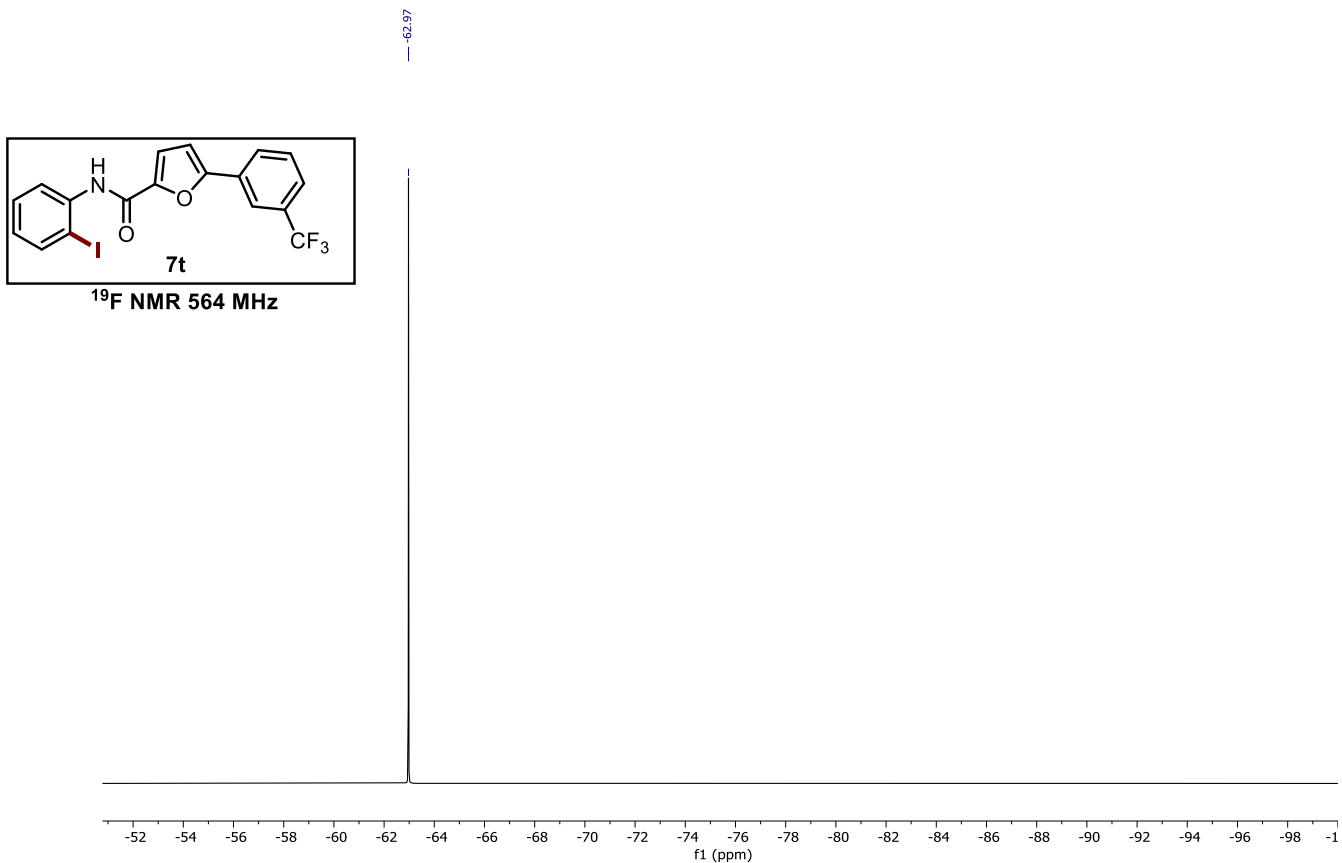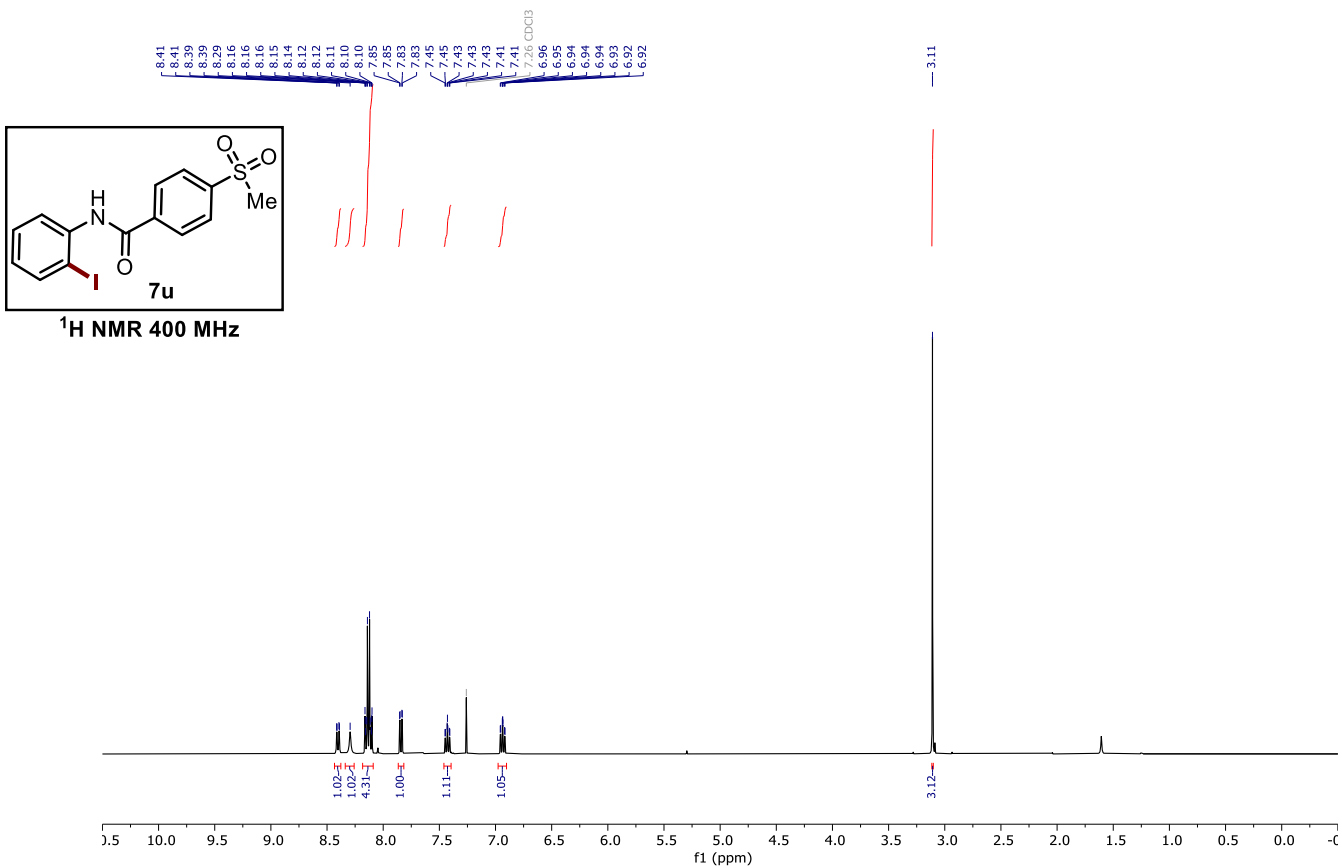

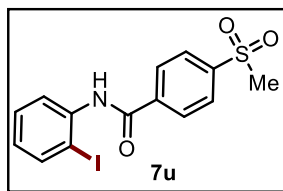

<sup>13</sup>C NMR 101 MHz

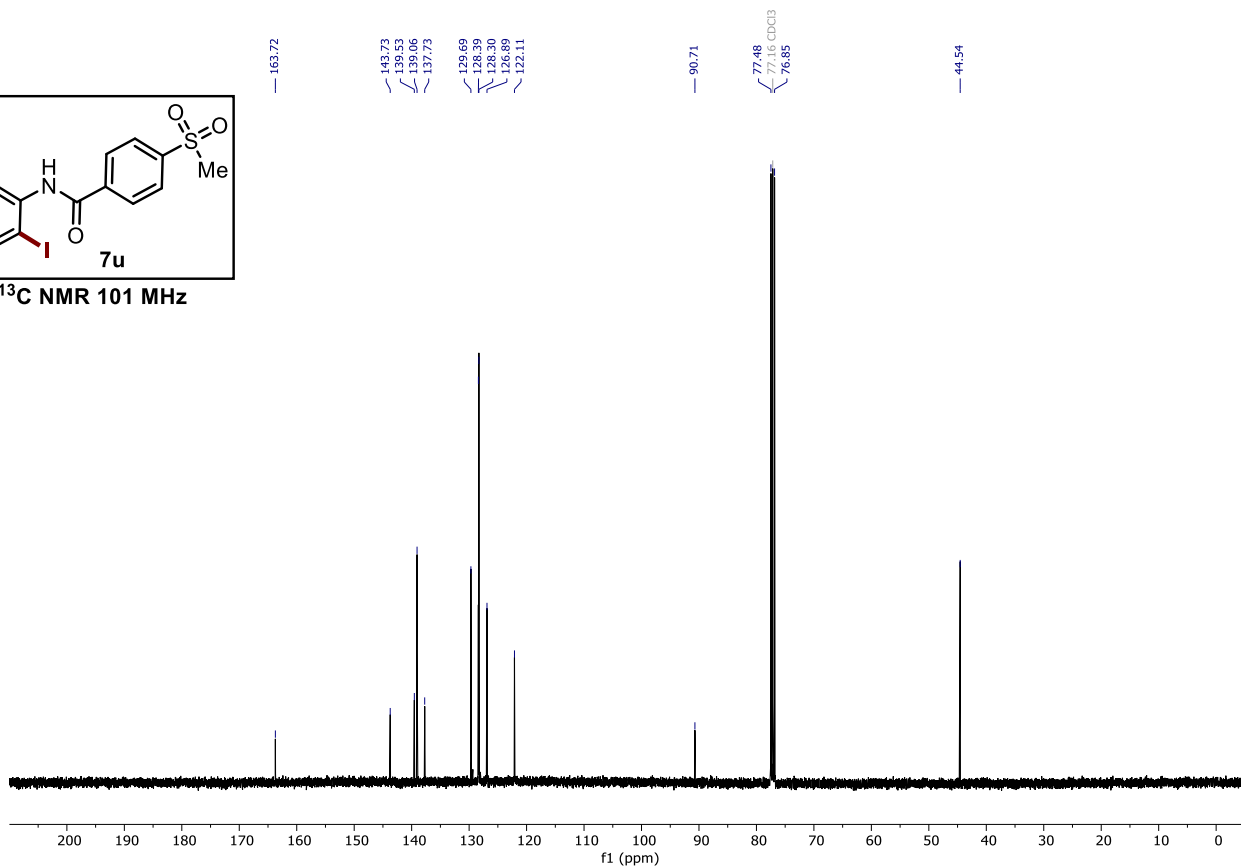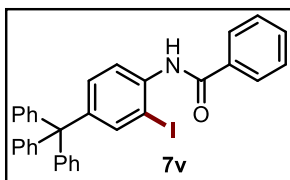

<sup>1</sup>H NMR 400 MHz

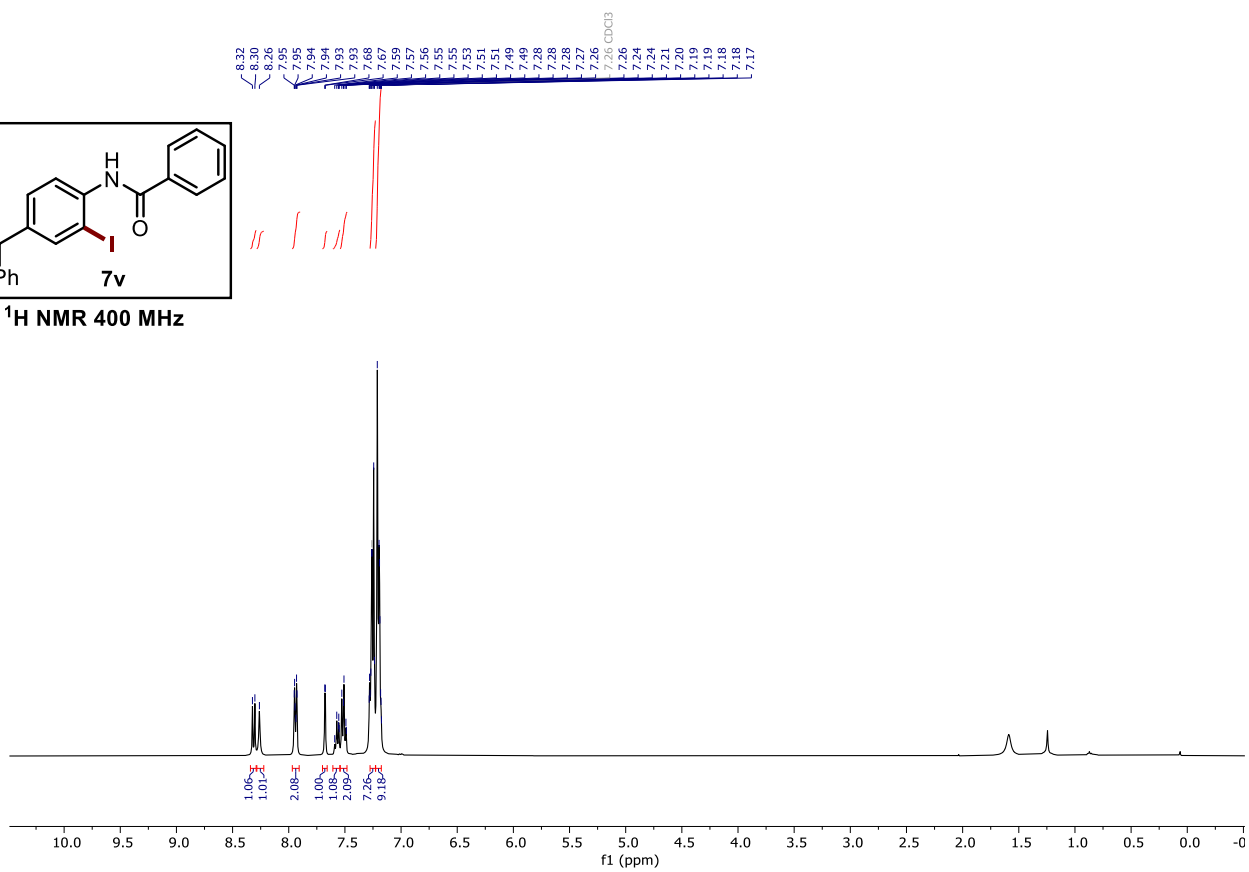

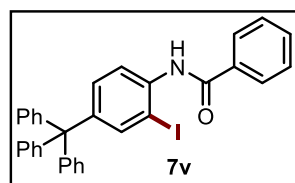

<sup>13</sup>C NMR 101 MHz

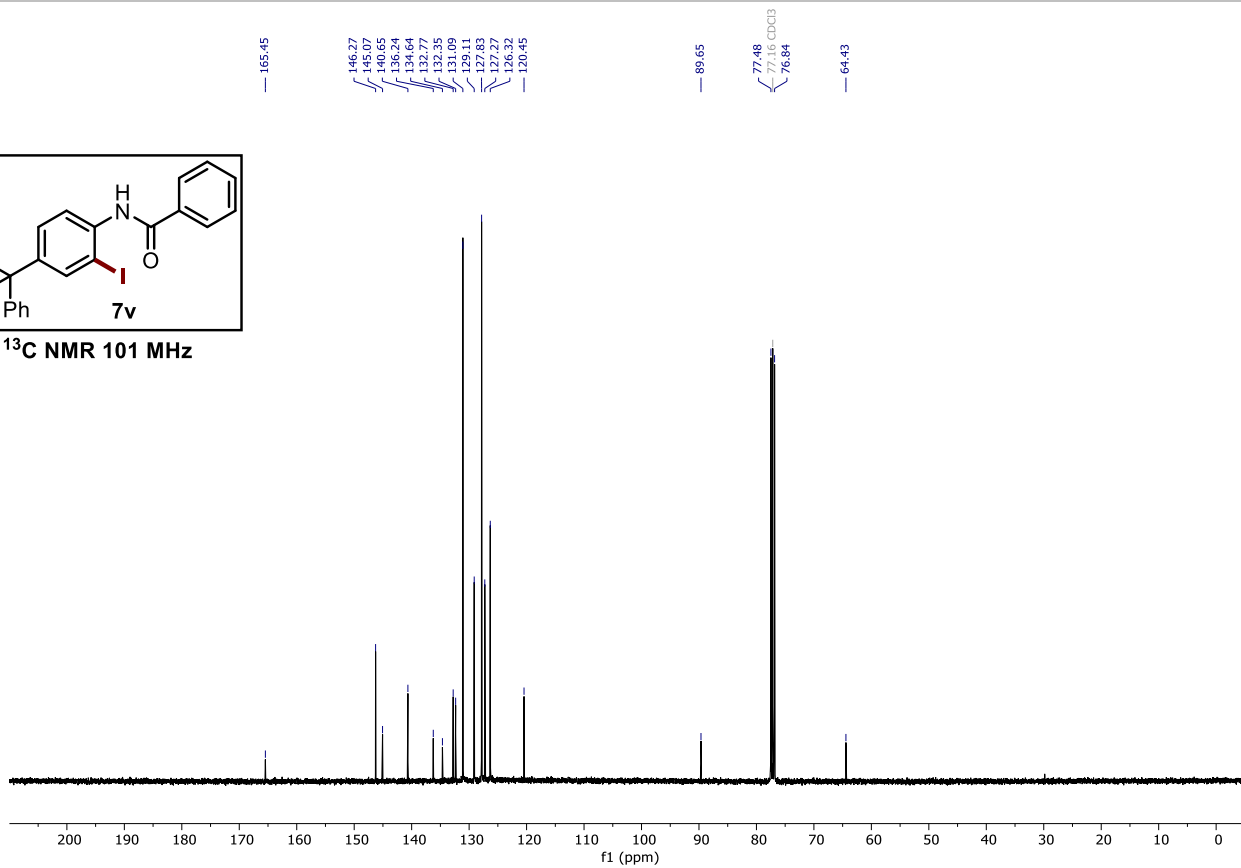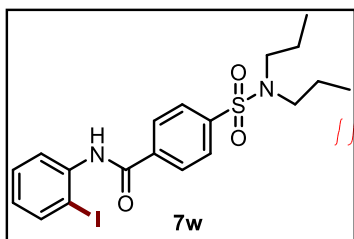

<sup>1</sup>H NMR 400 MHz

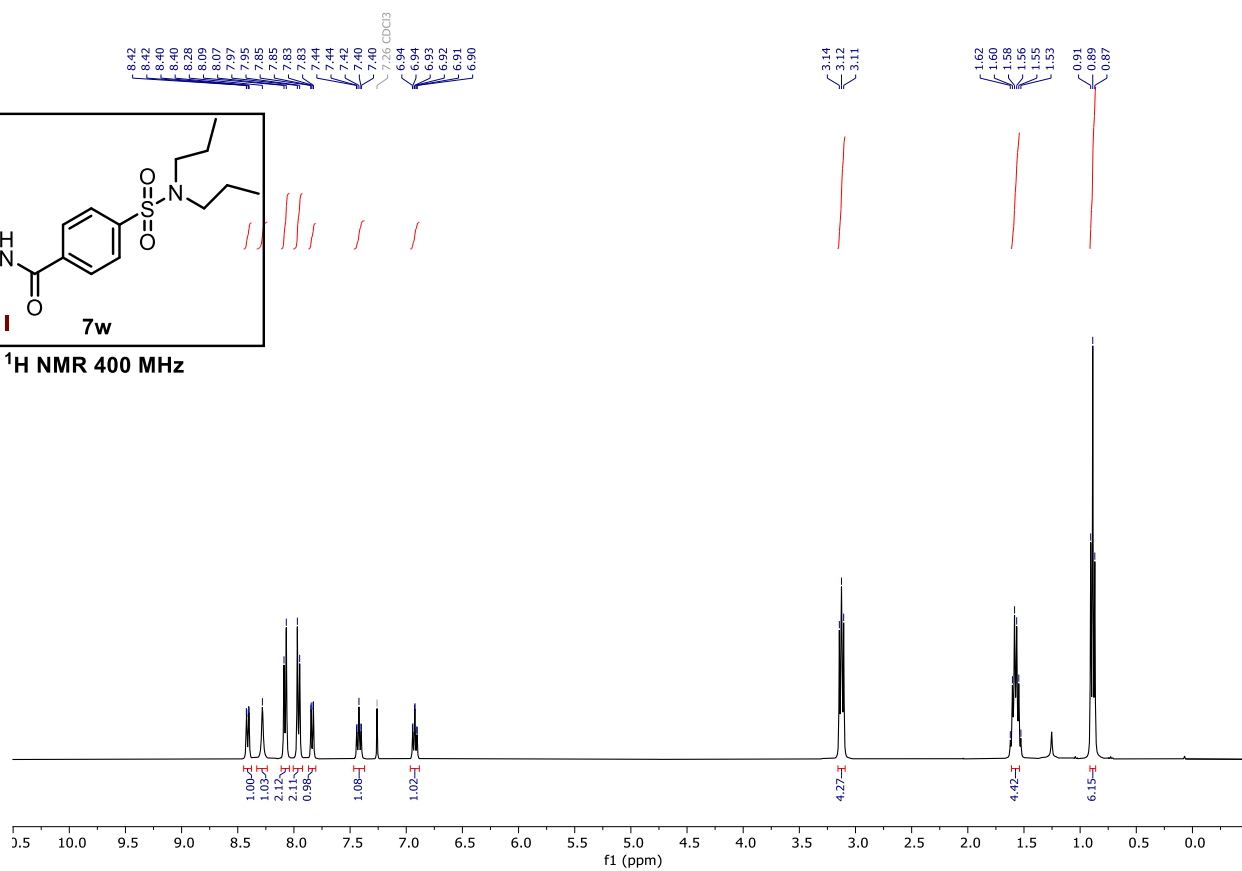



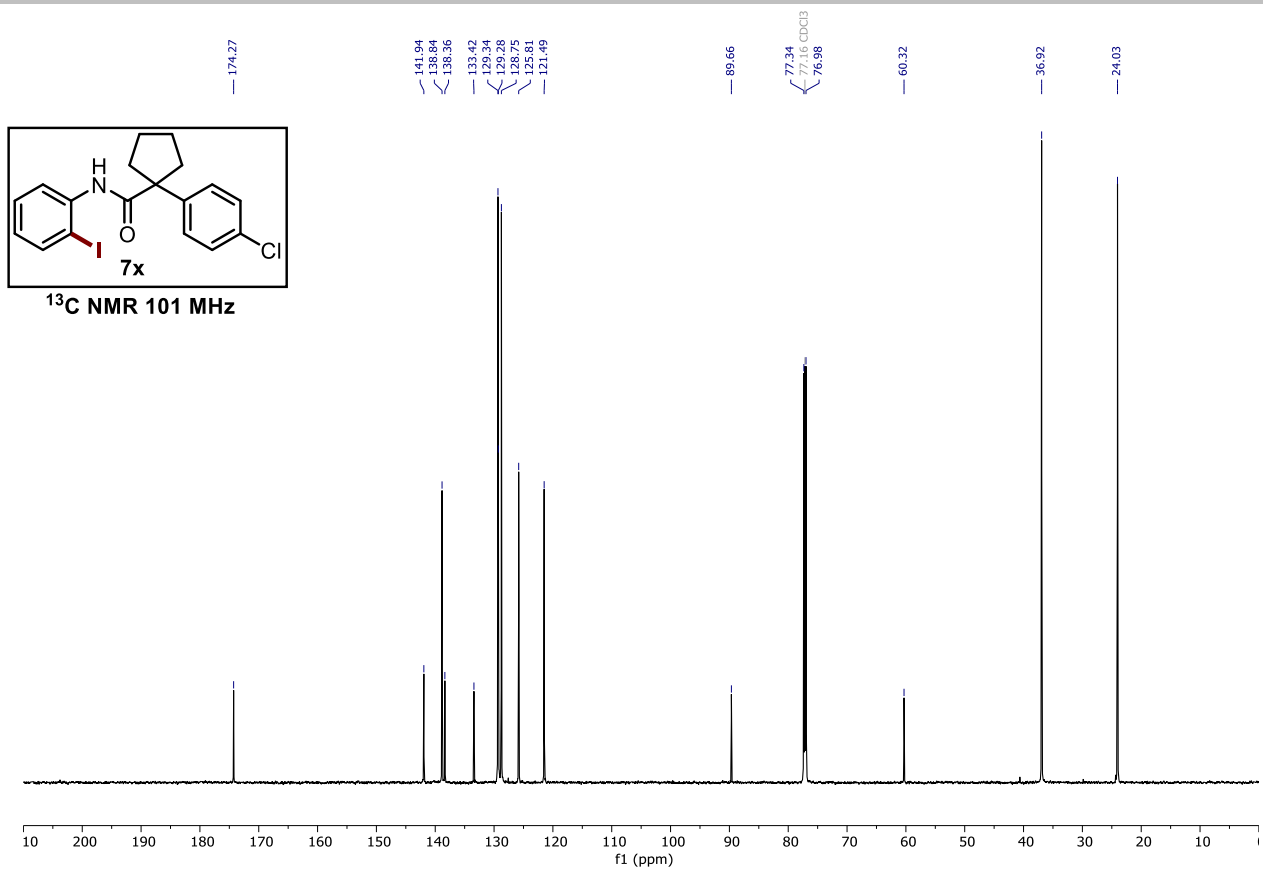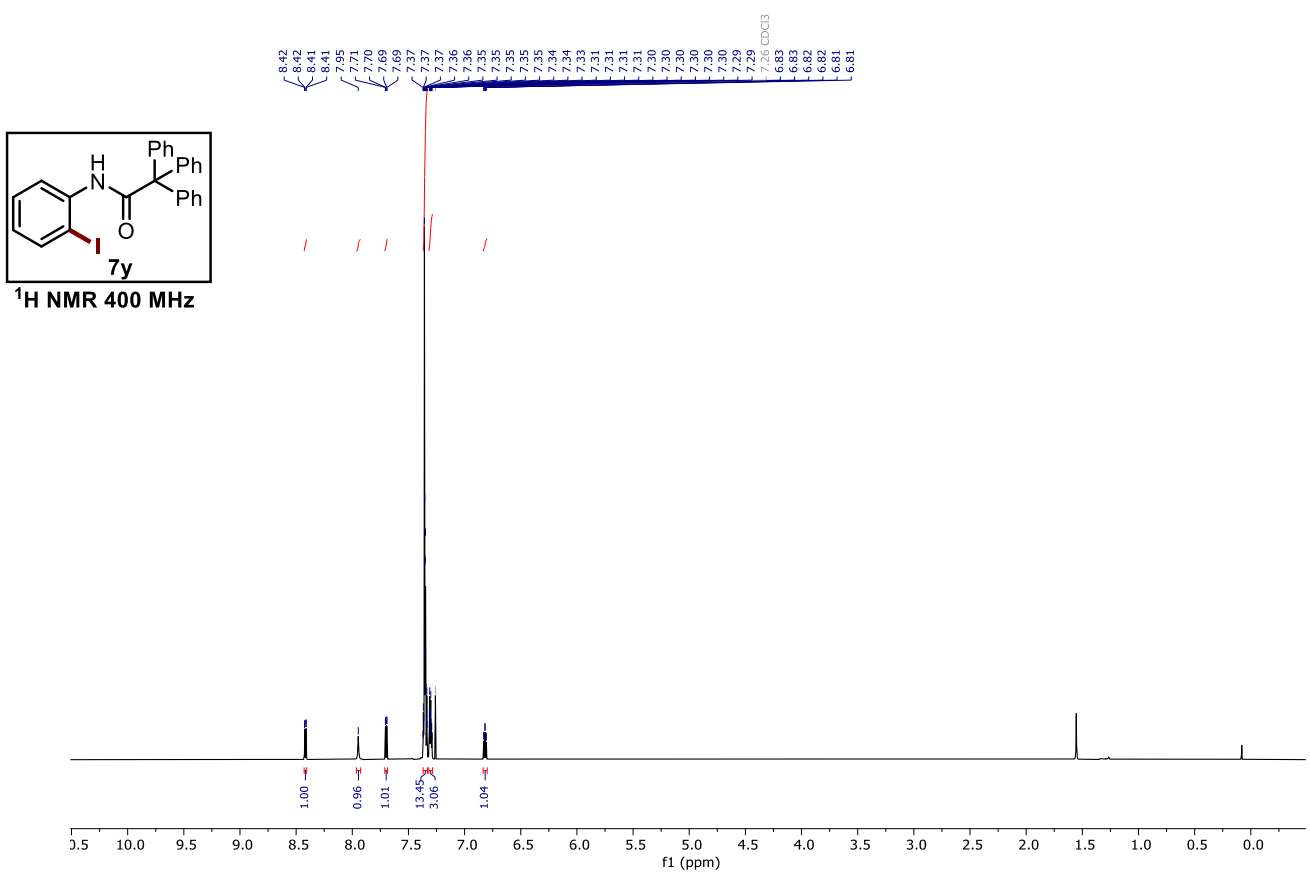

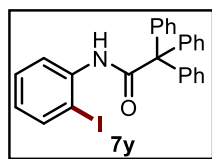

<sup>13</sup>C NMR 101 MHz

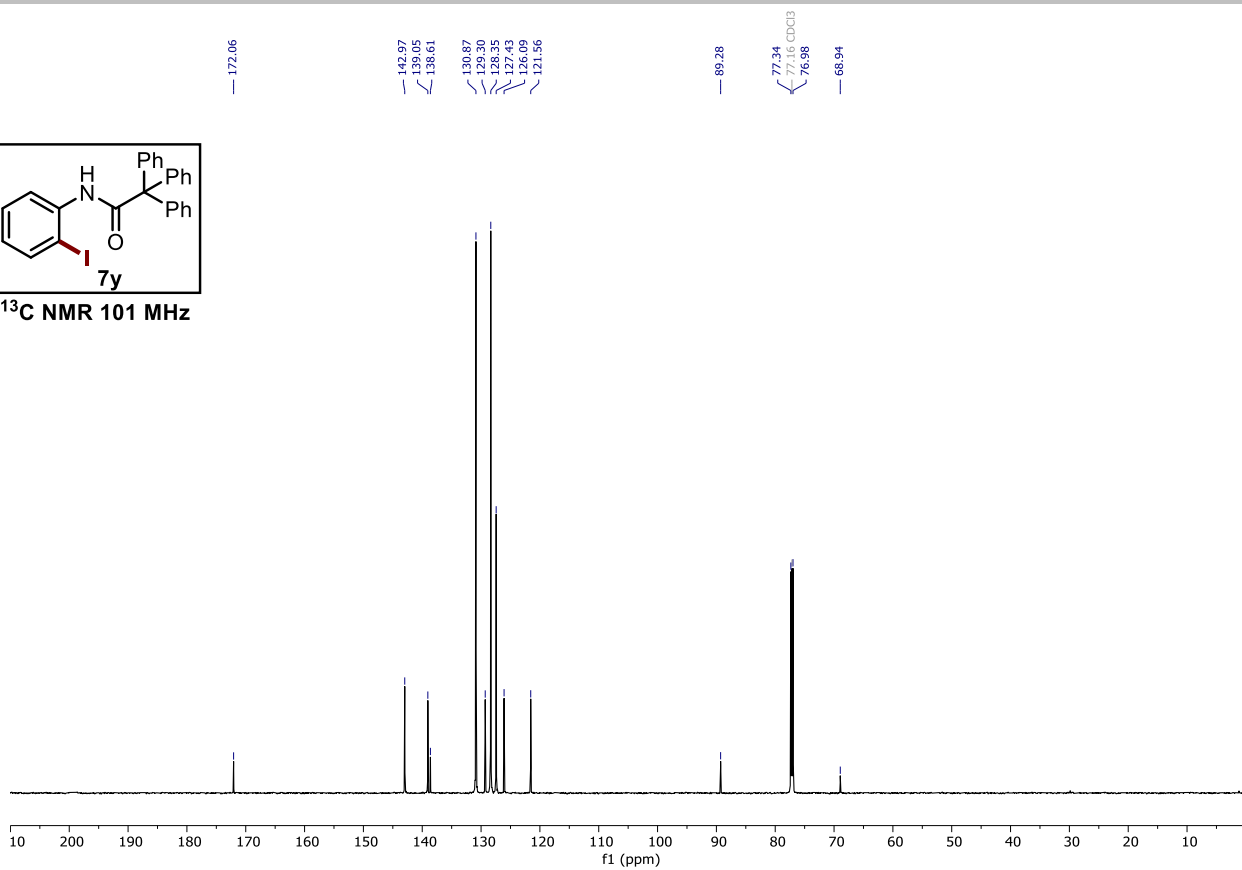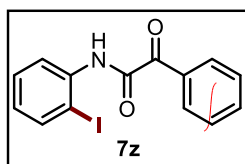

<sup>1</sup>H NMR 400 MHz

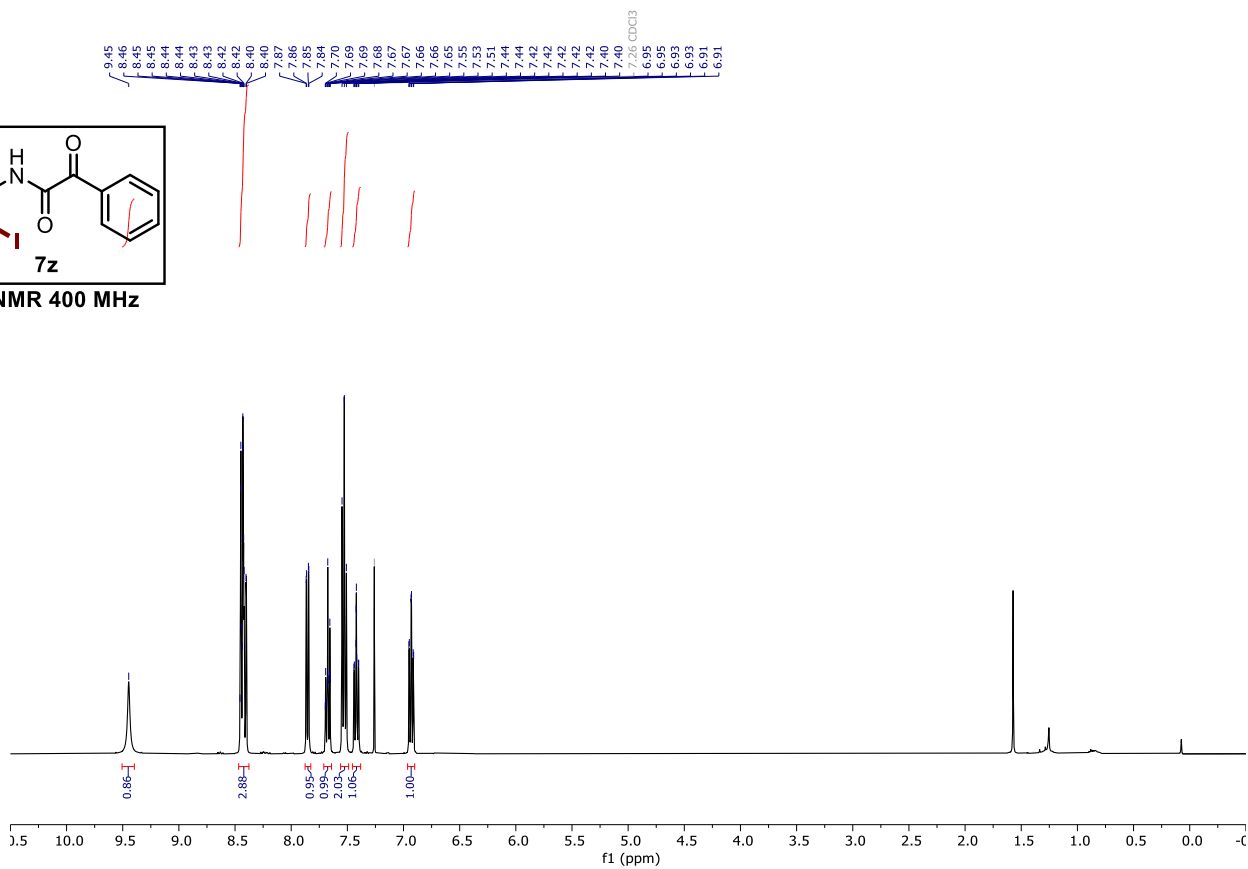

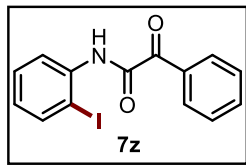

<sup>13</sup>C NMR 101 MHz

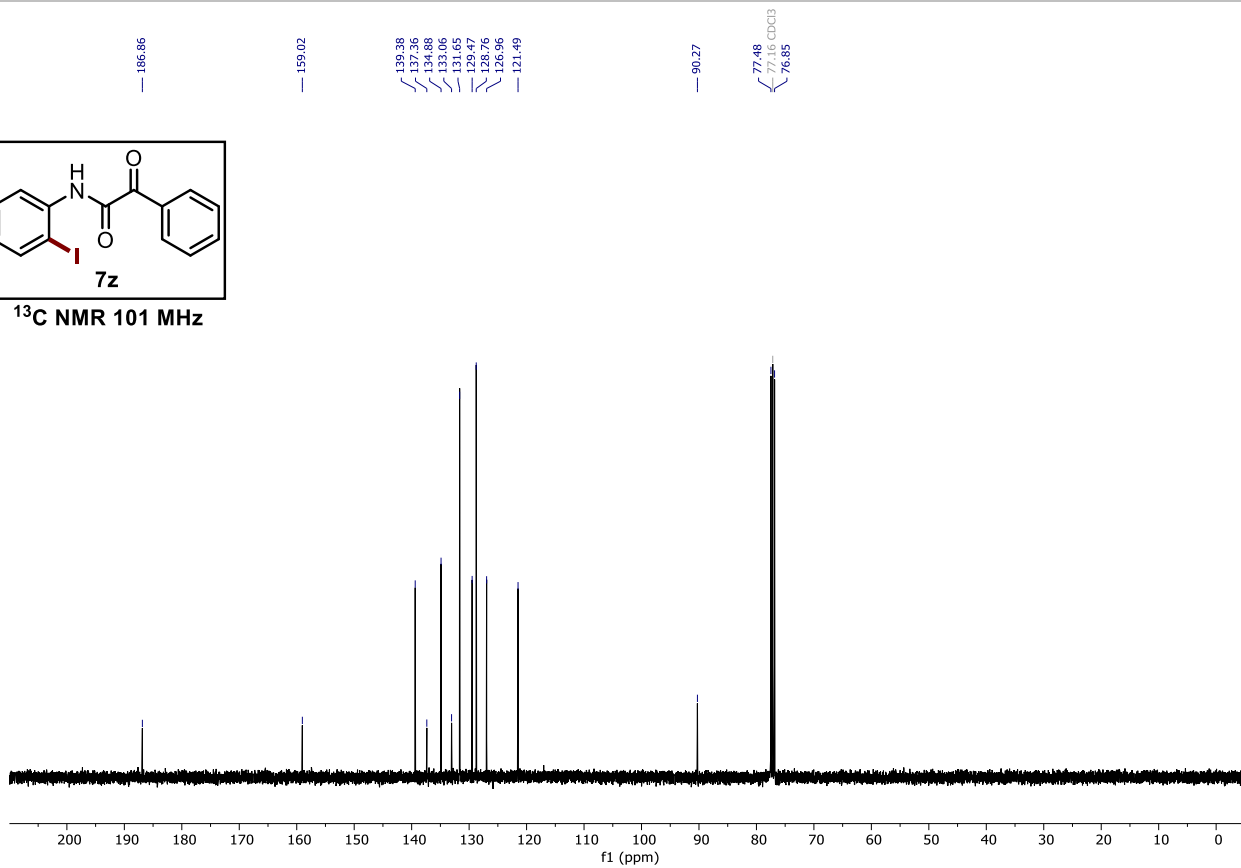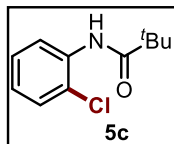

<sup>1</sup>H NMR 600 MHz

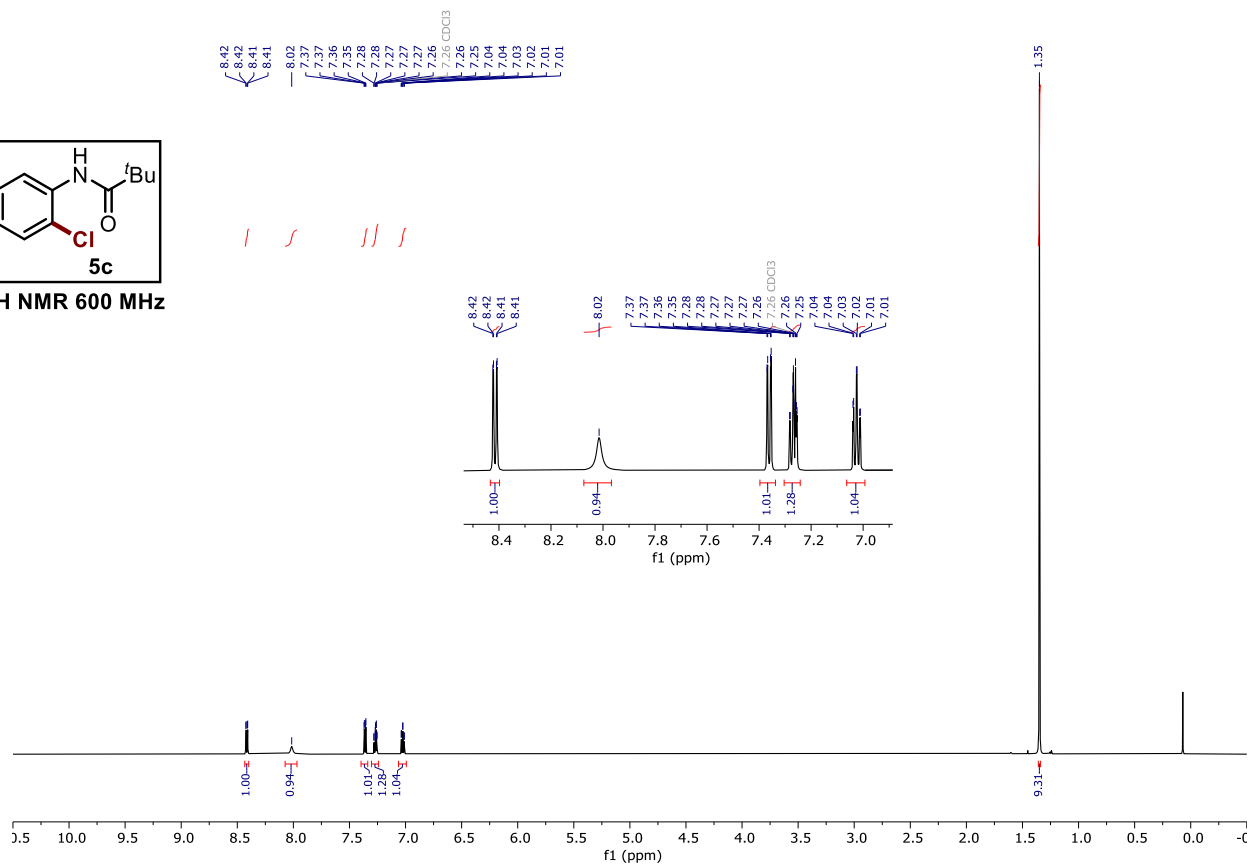





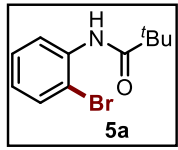

<sup>13</sup>C NMR 101 MHz

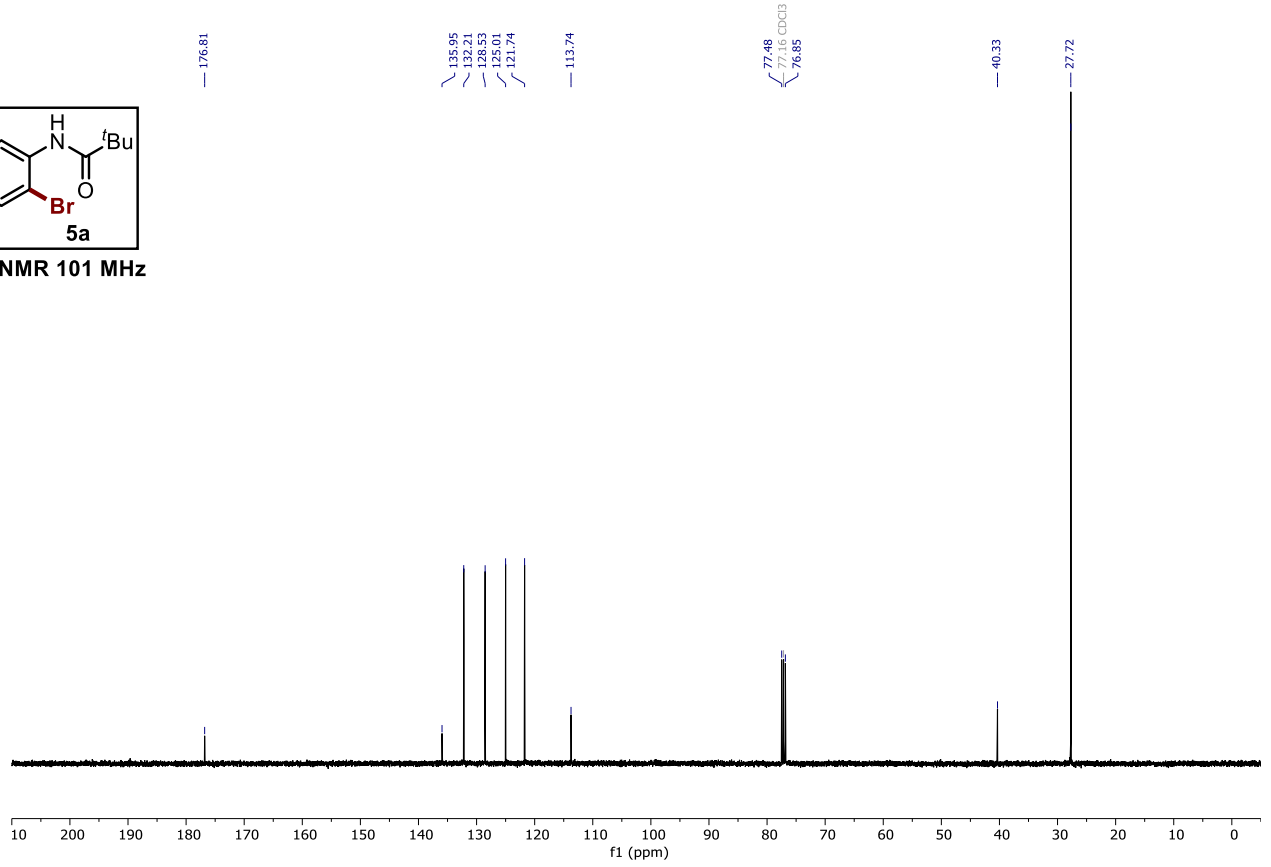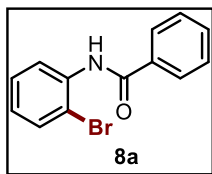

<sup>1</sup>H NMR 400 MHz

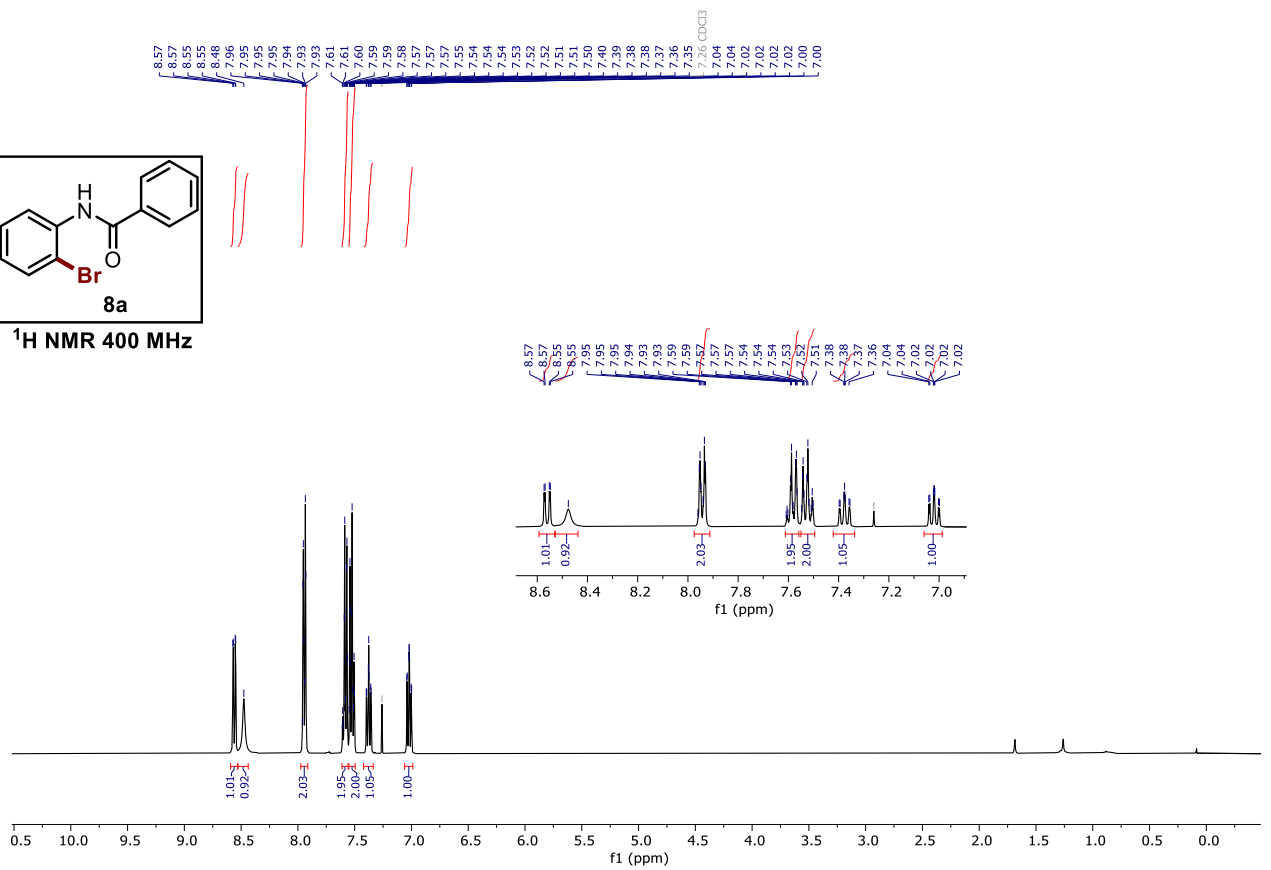

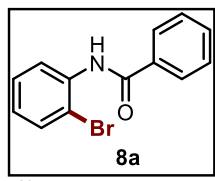

<sup>13</sup>C NMR 101 MHz

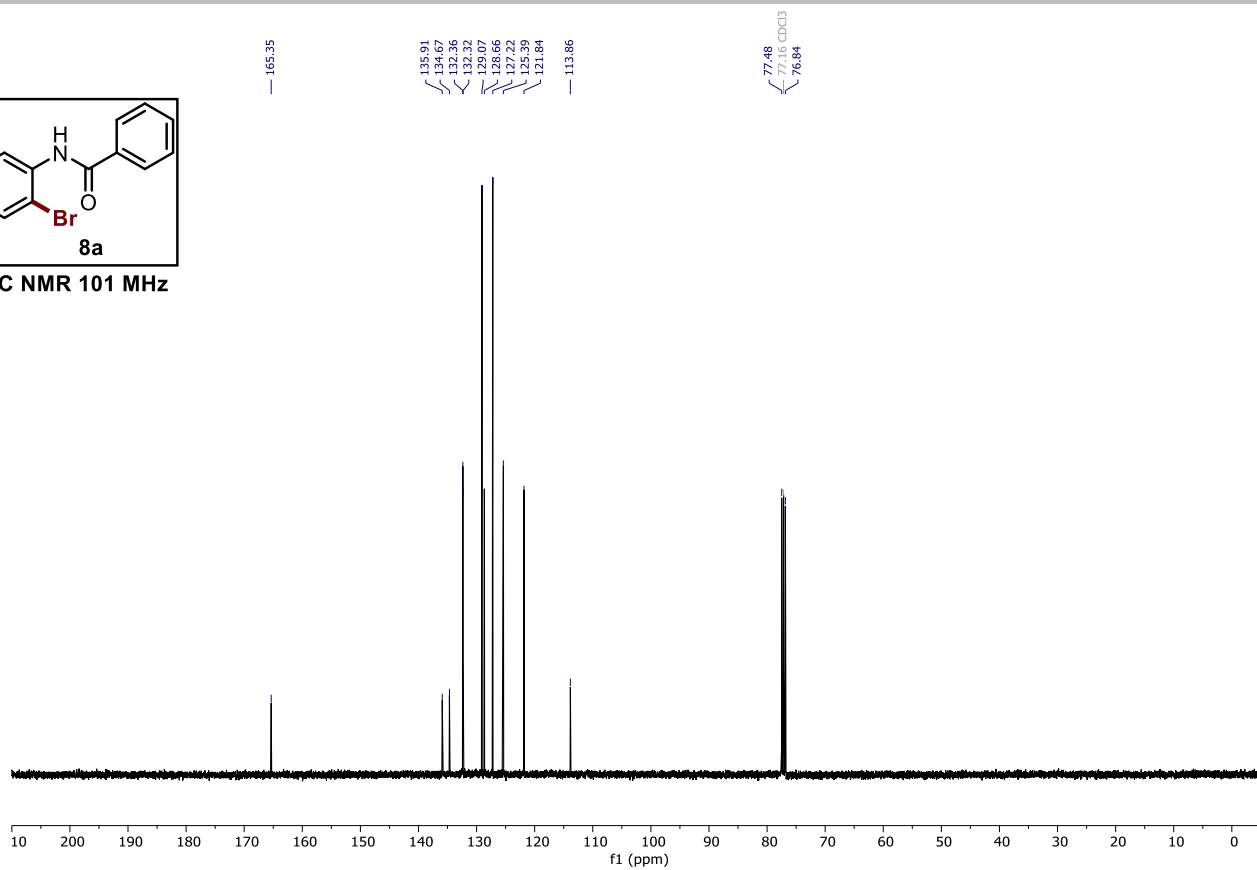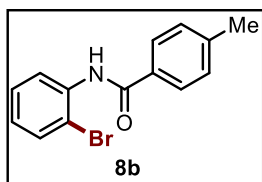

<sup>1</sup>H NMR 400 MHz

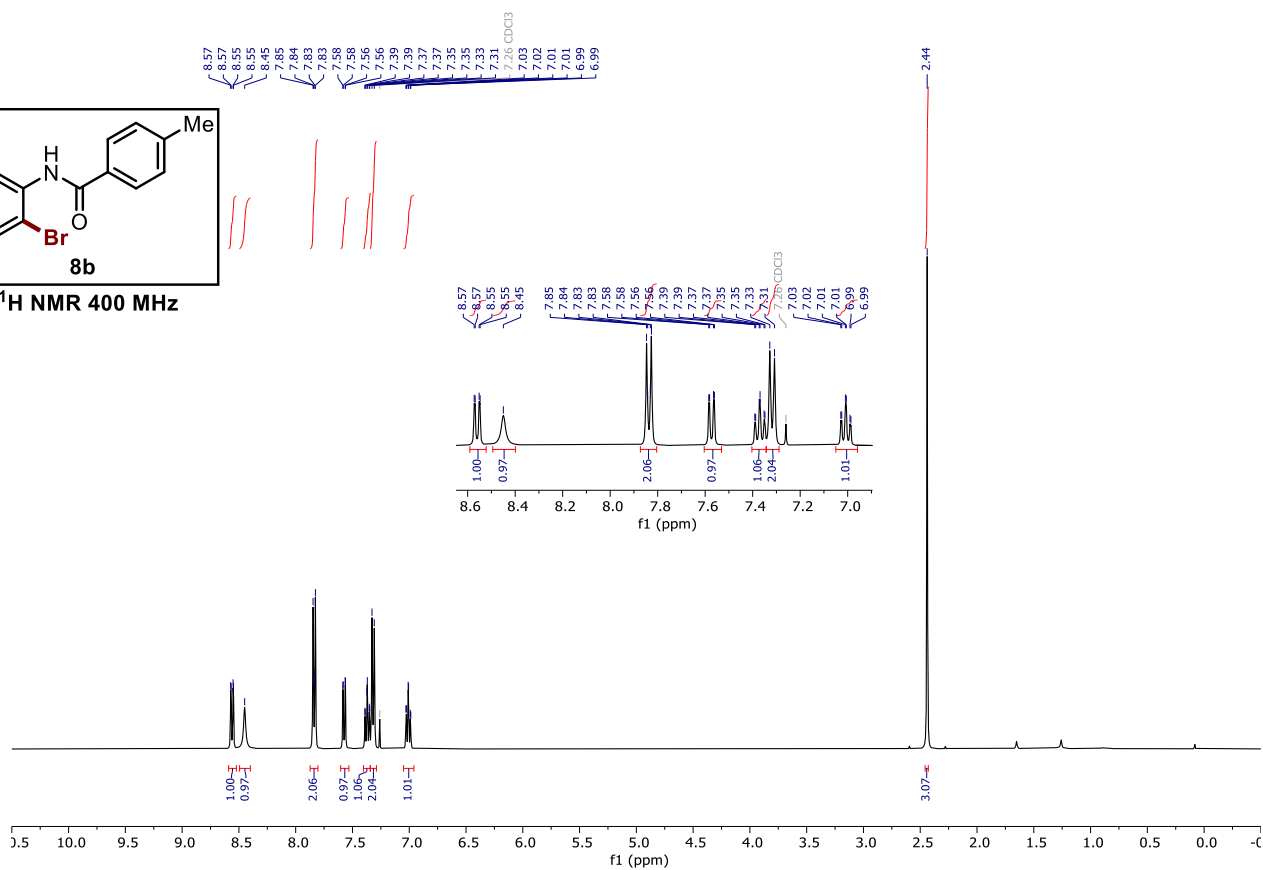

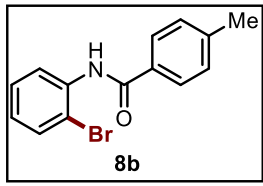

<sup>13</sup>C NMR 101 MHz

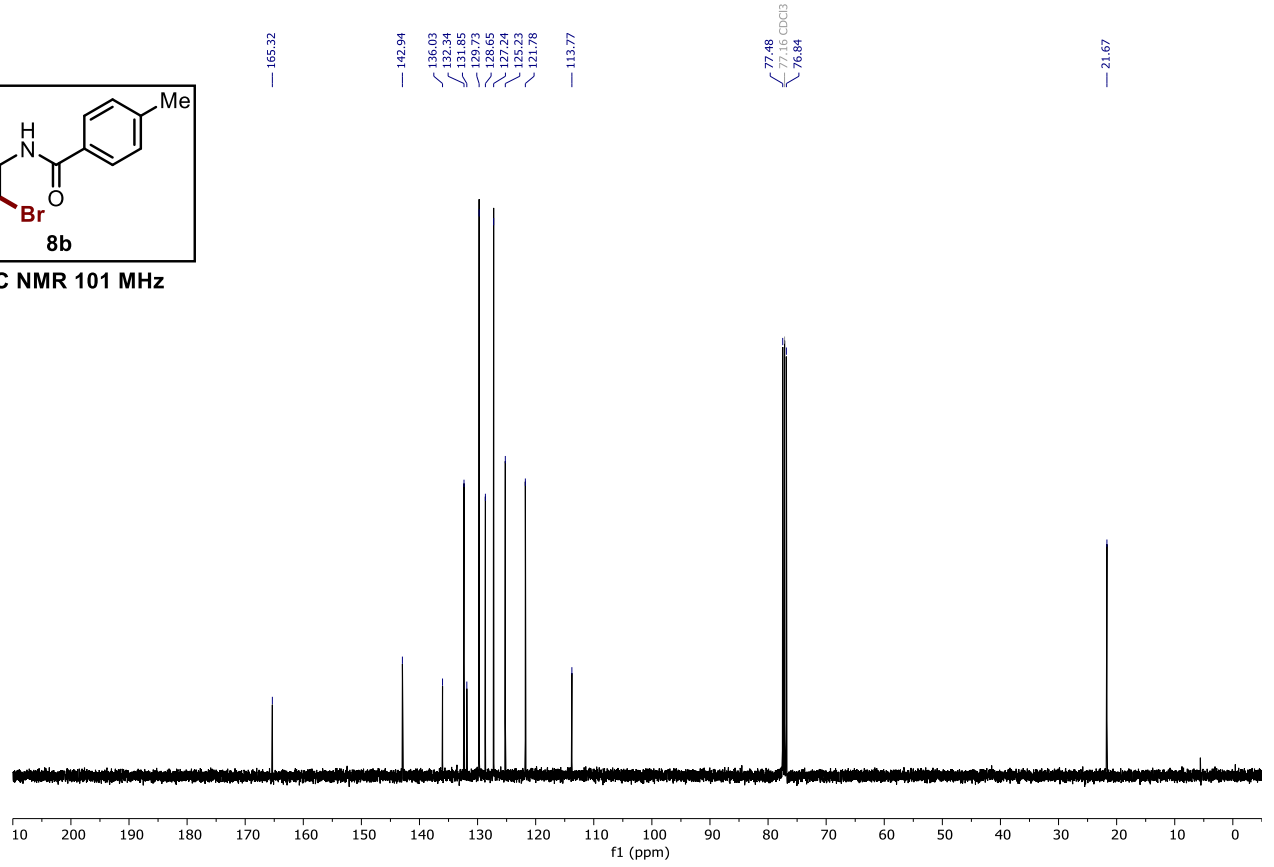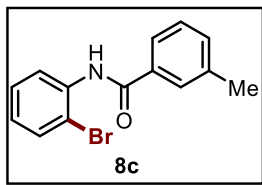

<sup>1</sup>H NMR 400 MHz

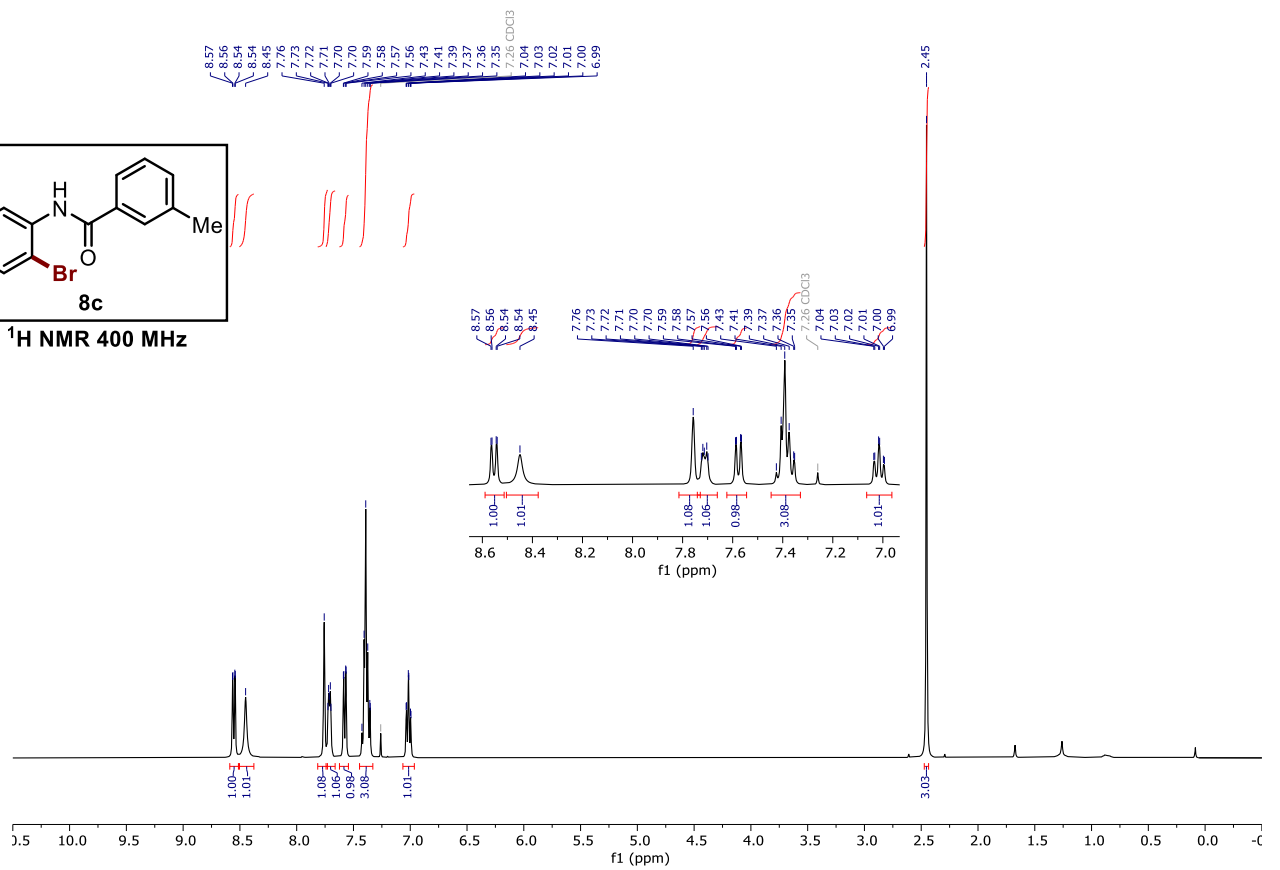



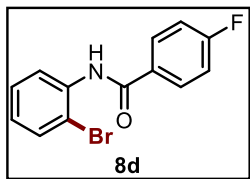

<sup>13</sup>C NMR 101 MHz

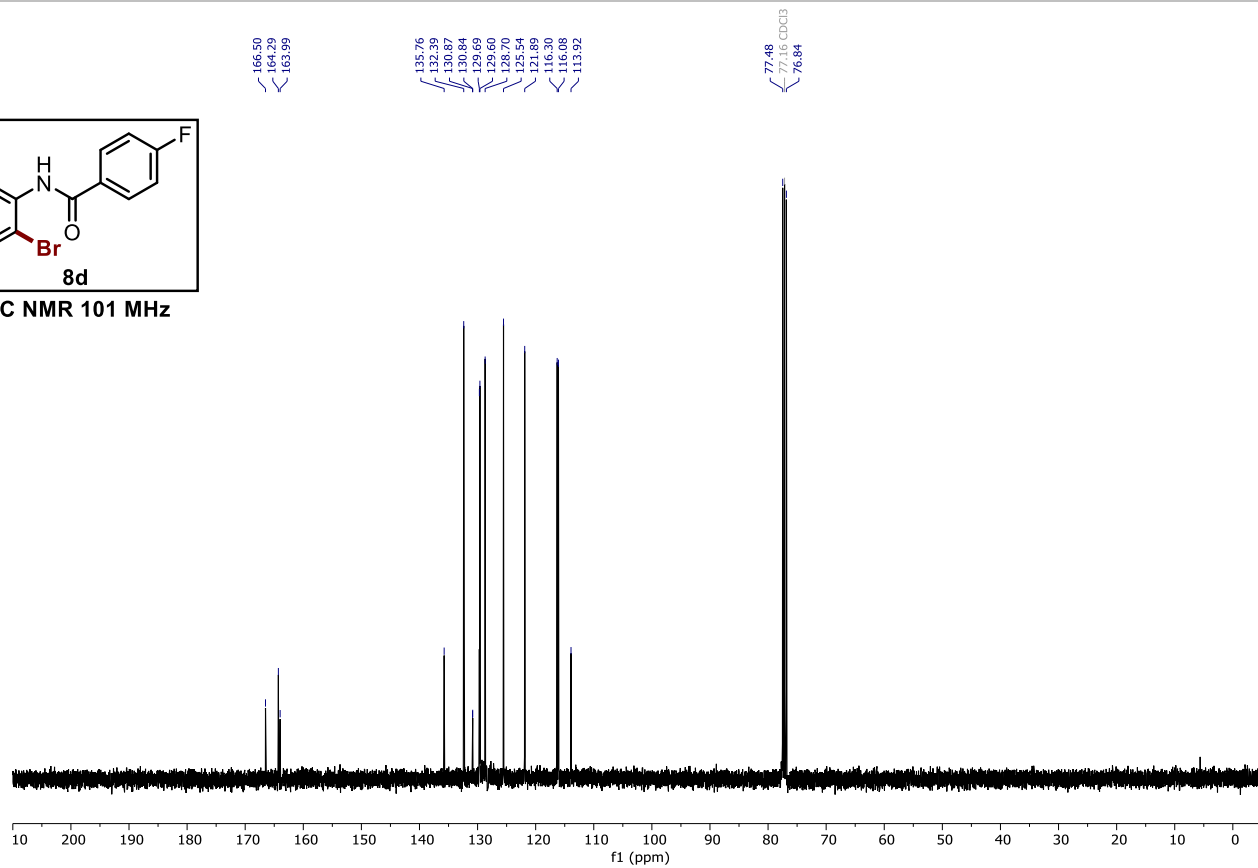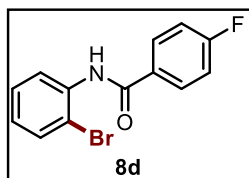

<sup>19</sup>F NMR 470 MHz

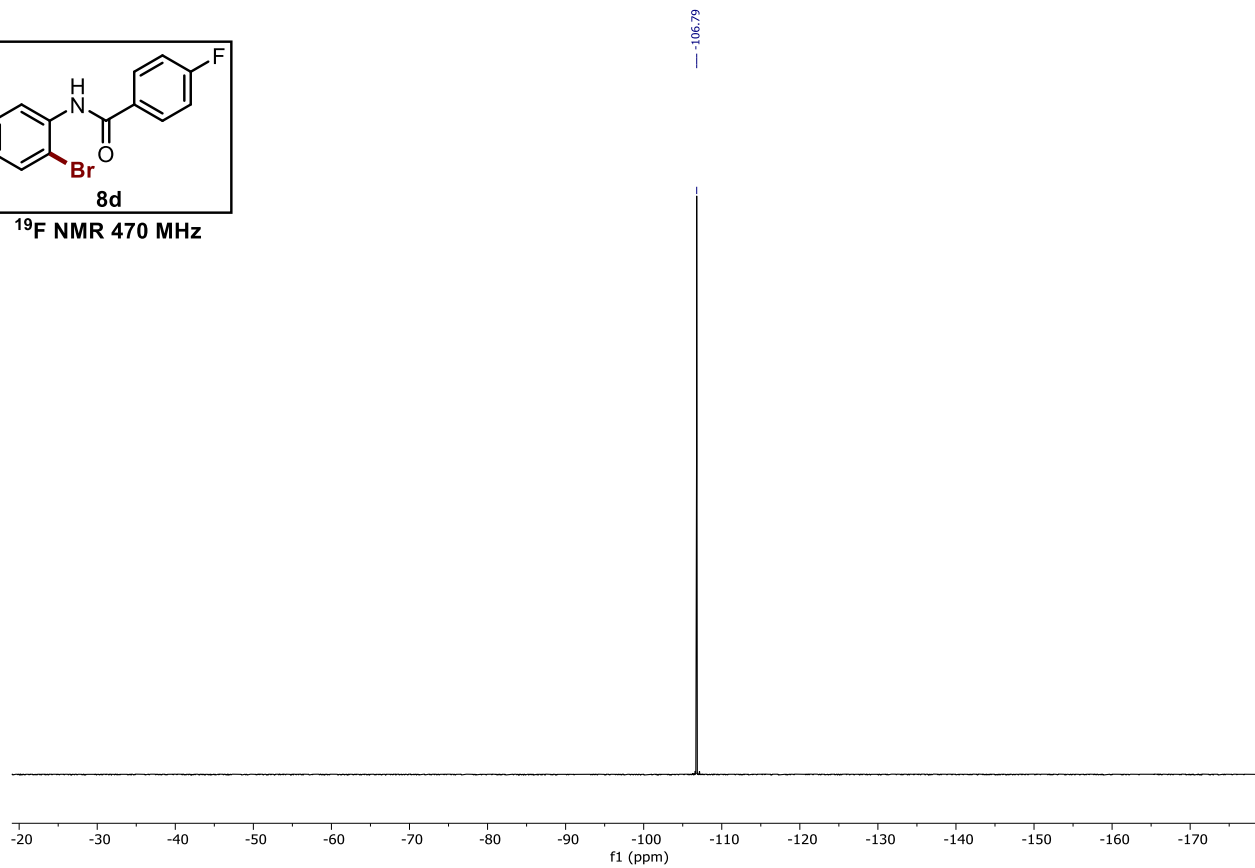

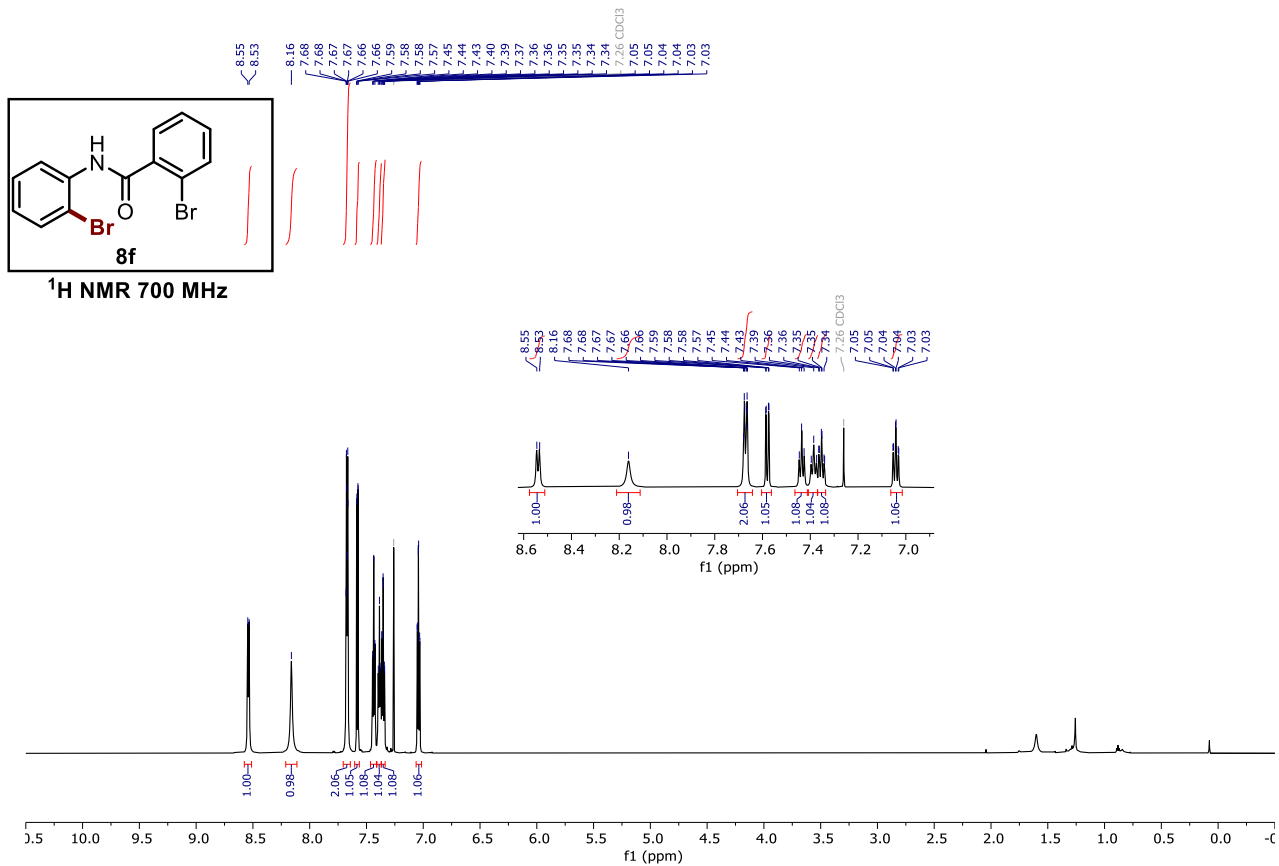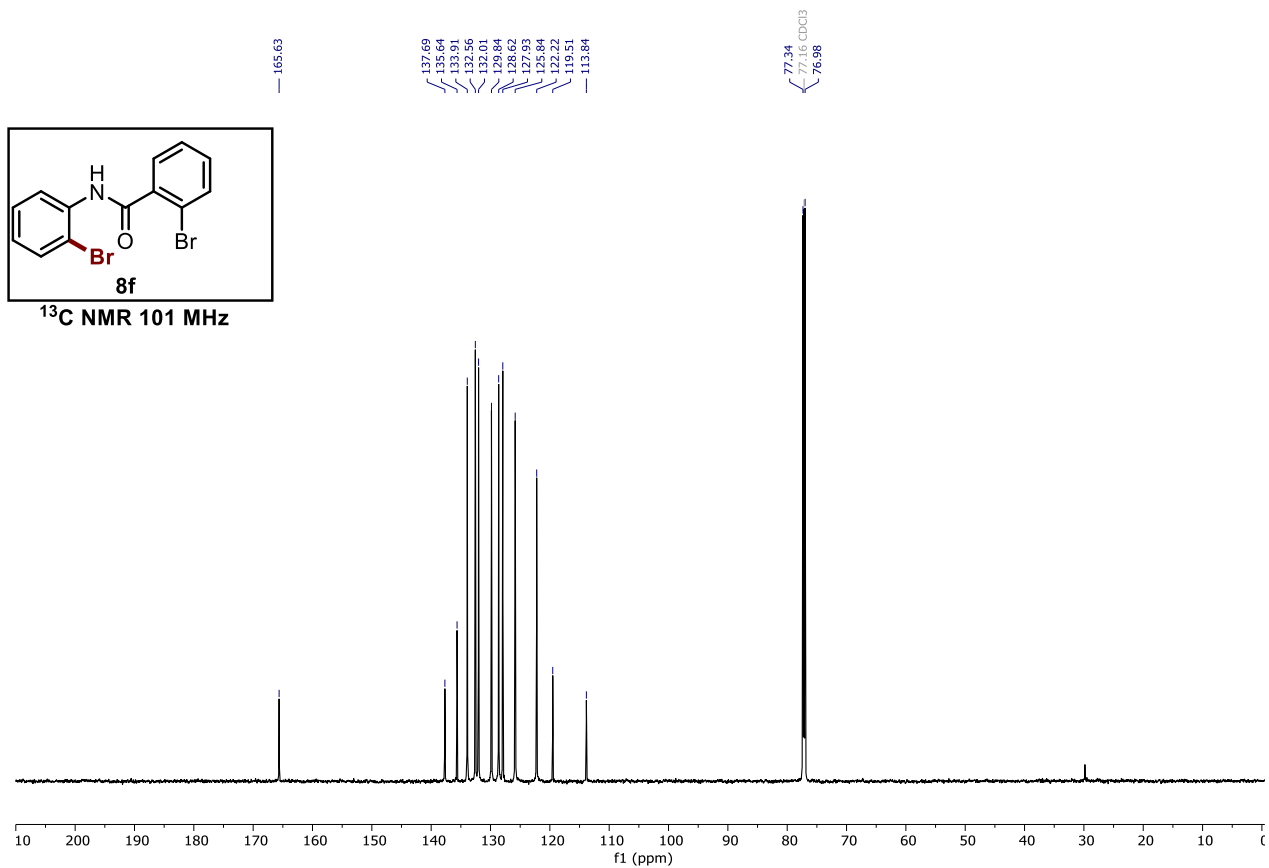

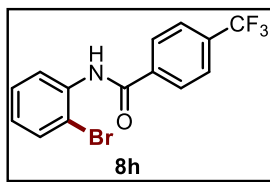

<sup>1</sup>H NMR 400 MHz

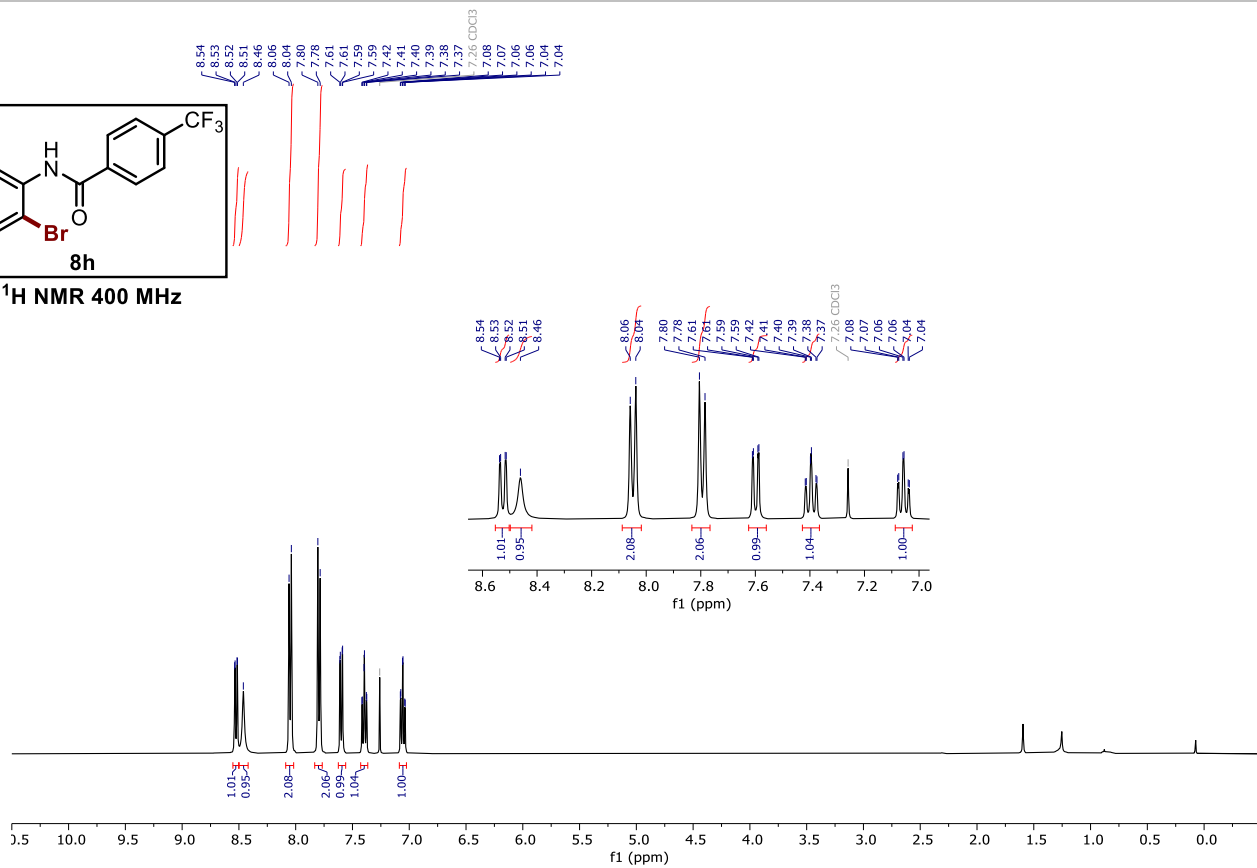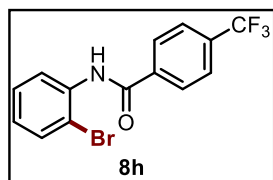

<sup>13</sup>C NMR 101 MHz

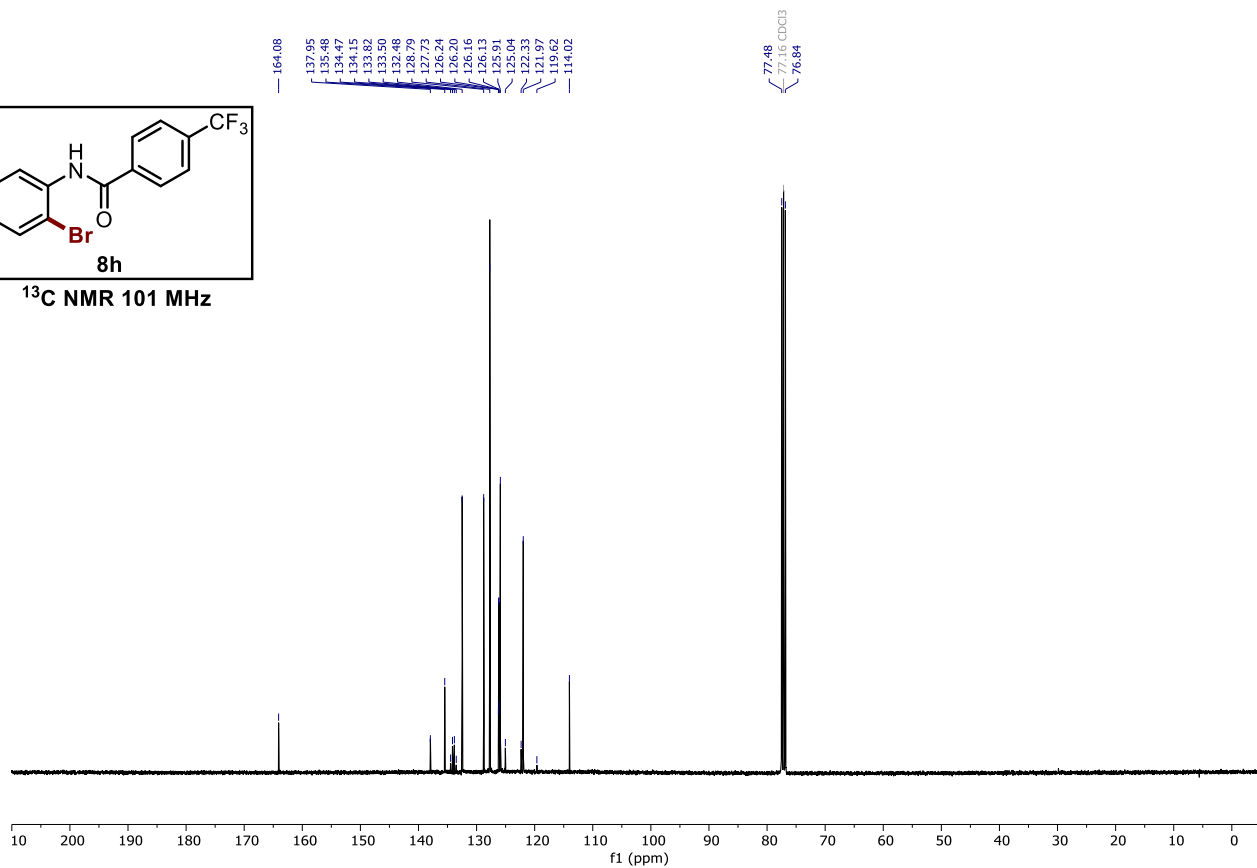



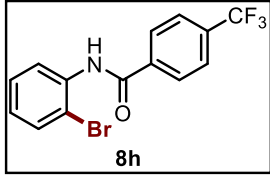

<sup>19</sup>F NMR 470 MHz

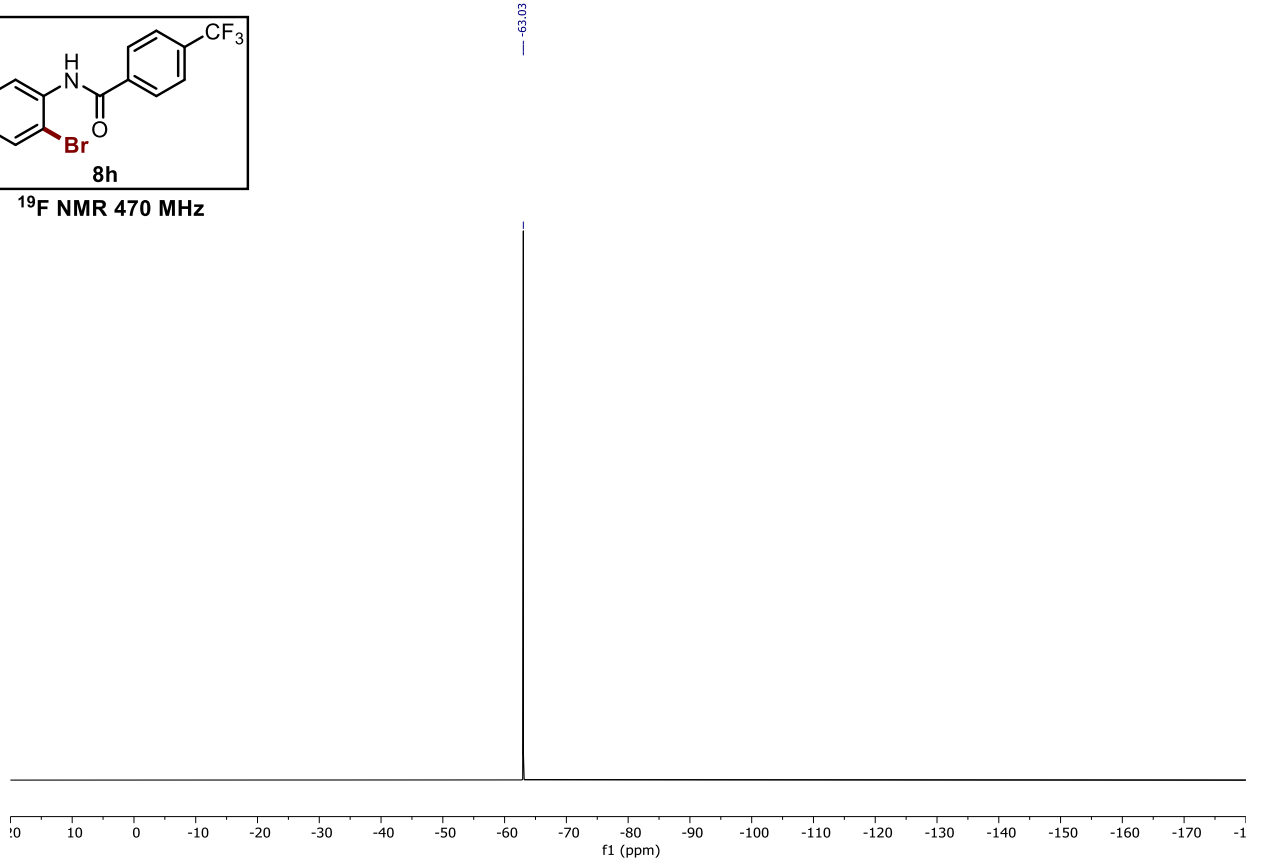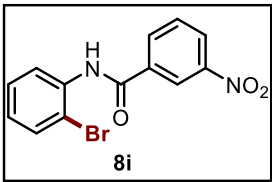

<sup>1</sup>H NMR 400 MHz

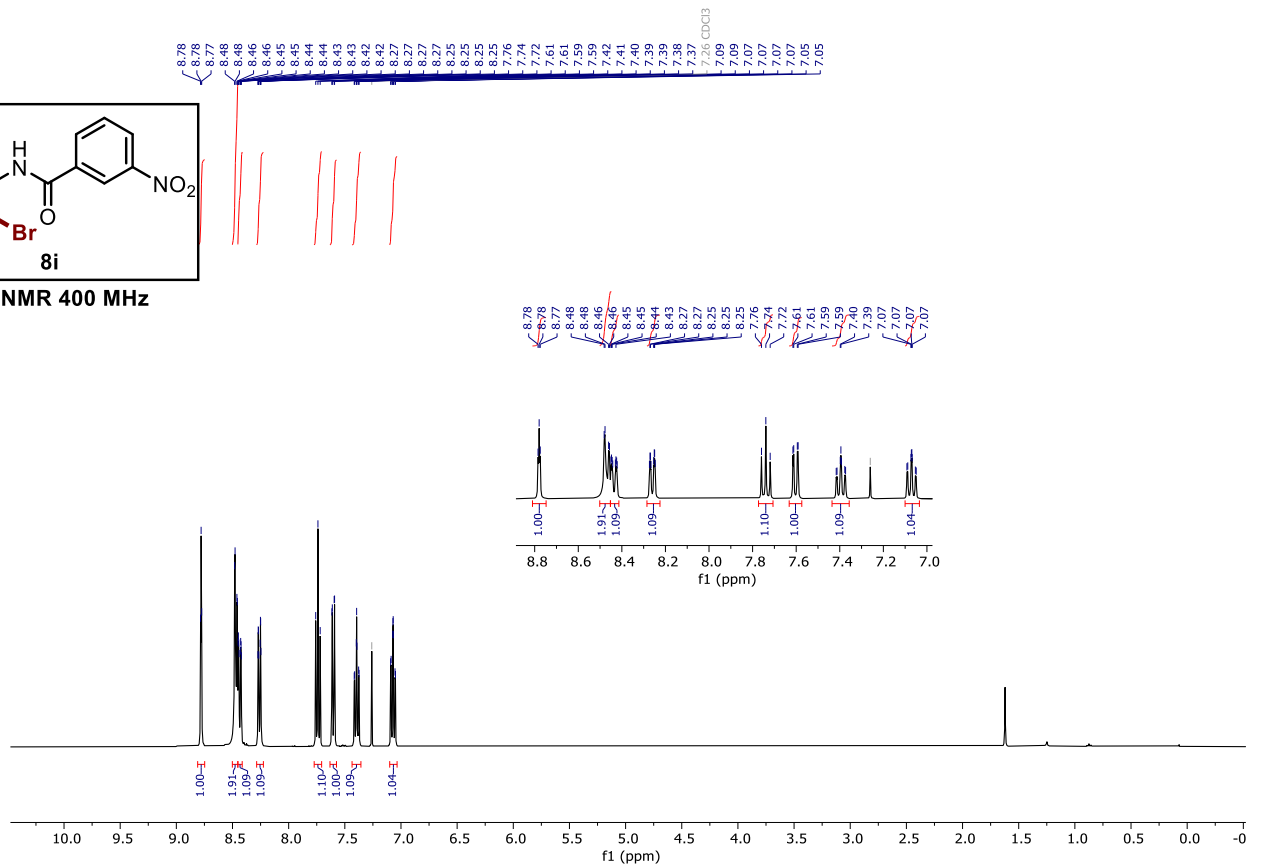

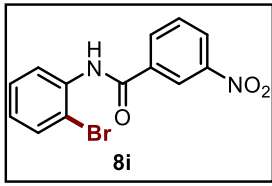

<sup>13</sup>C NMR 101 MHz

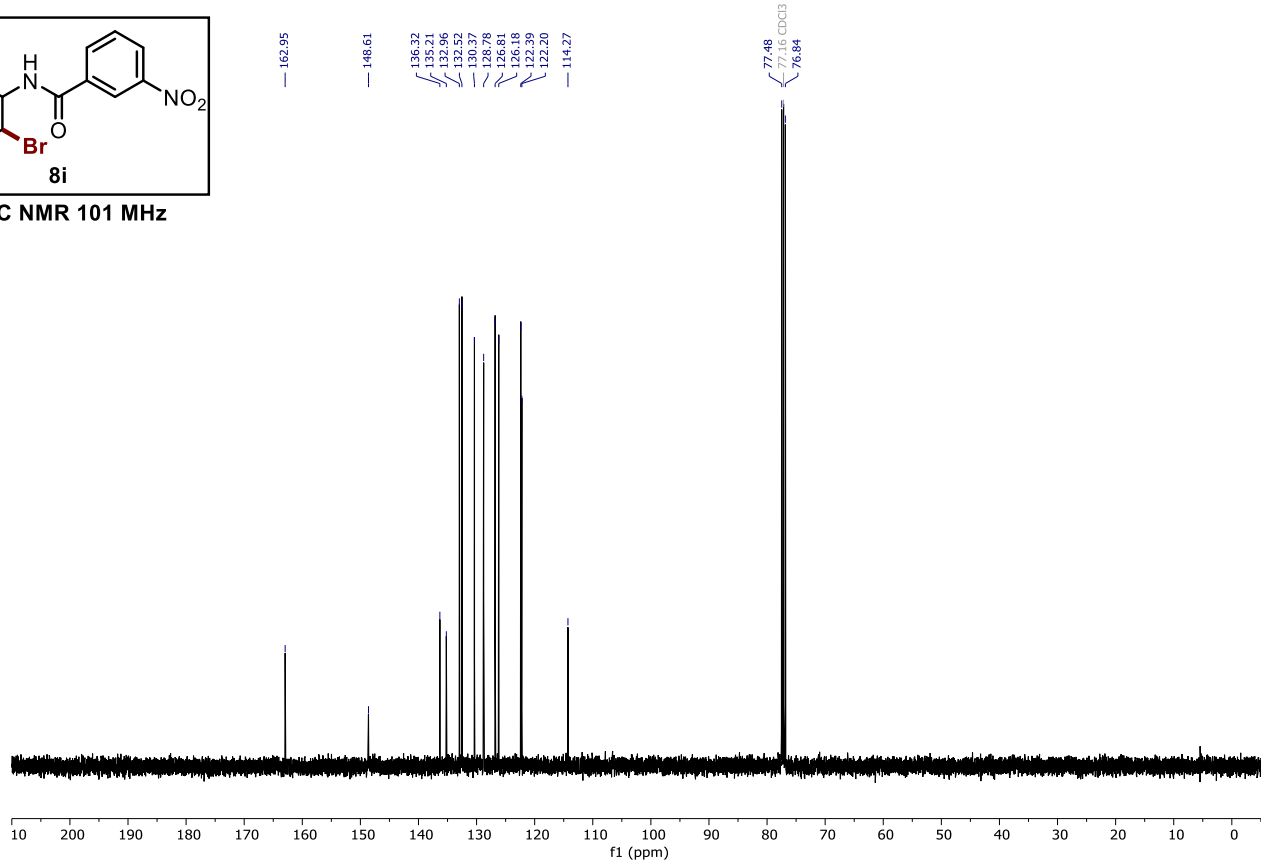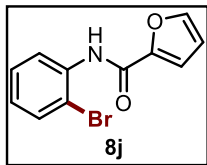

<sup>1</sup>H NMR 400 MHz

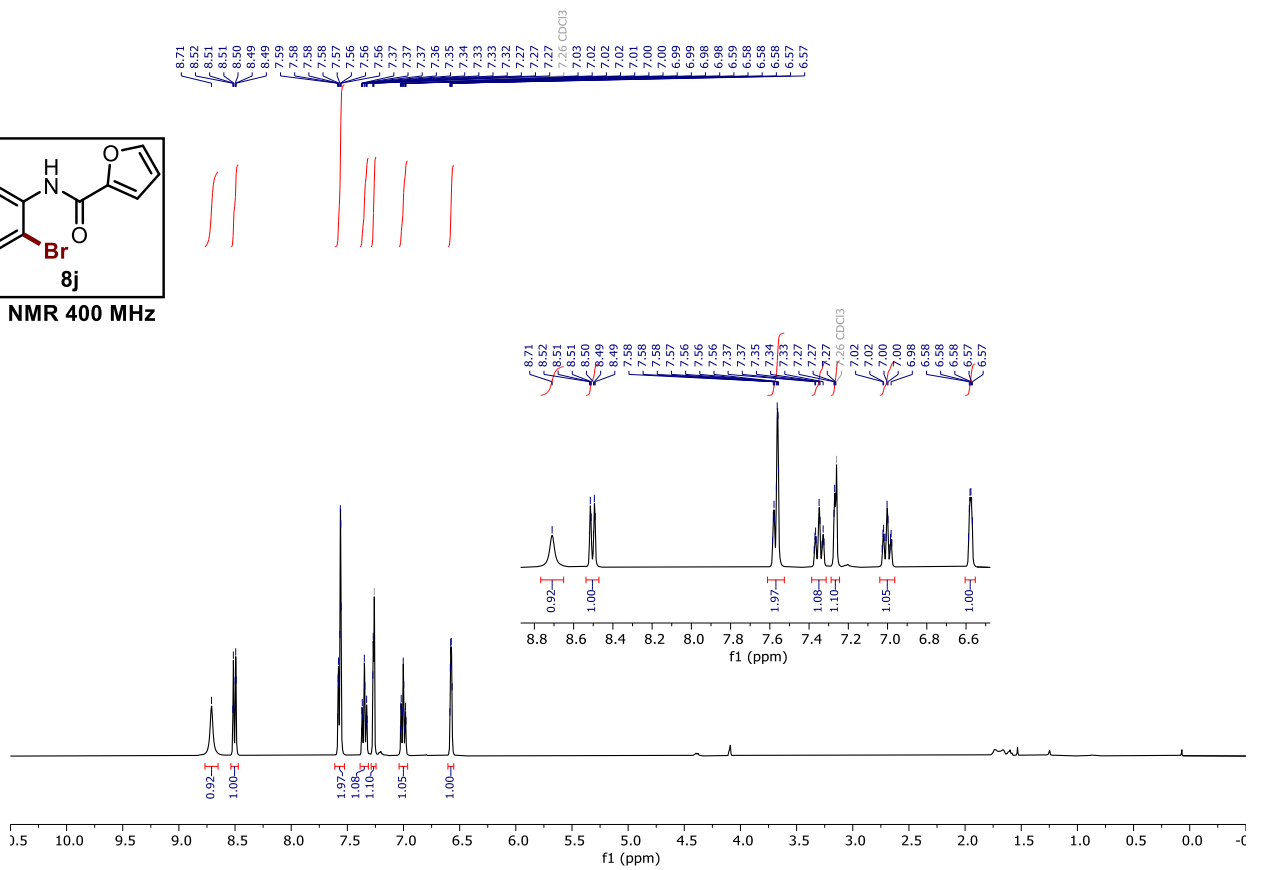

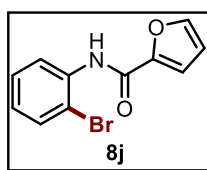

<sup>13</sup>C NMR 101 MHz

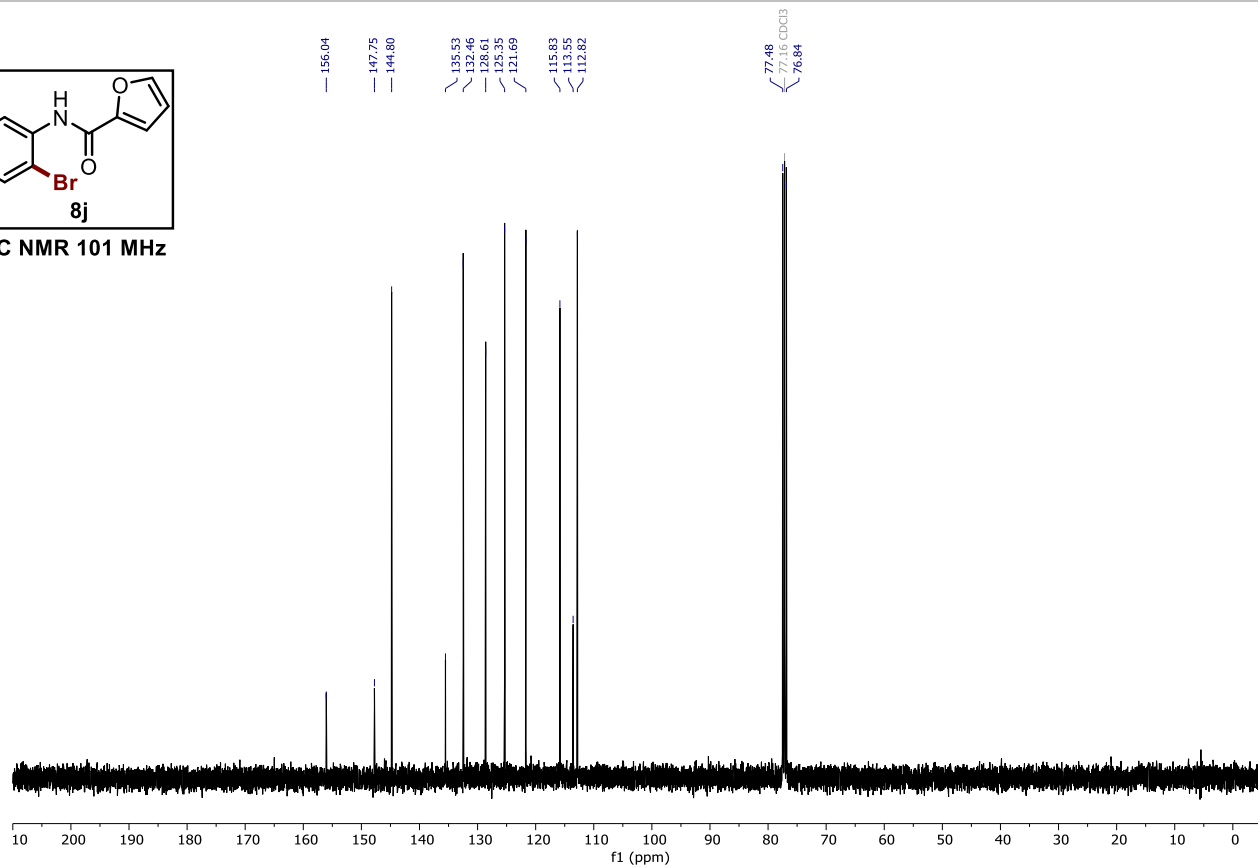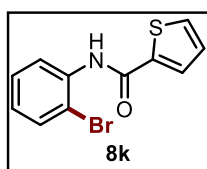

<sup>1</sup>H NMR 400 MHz

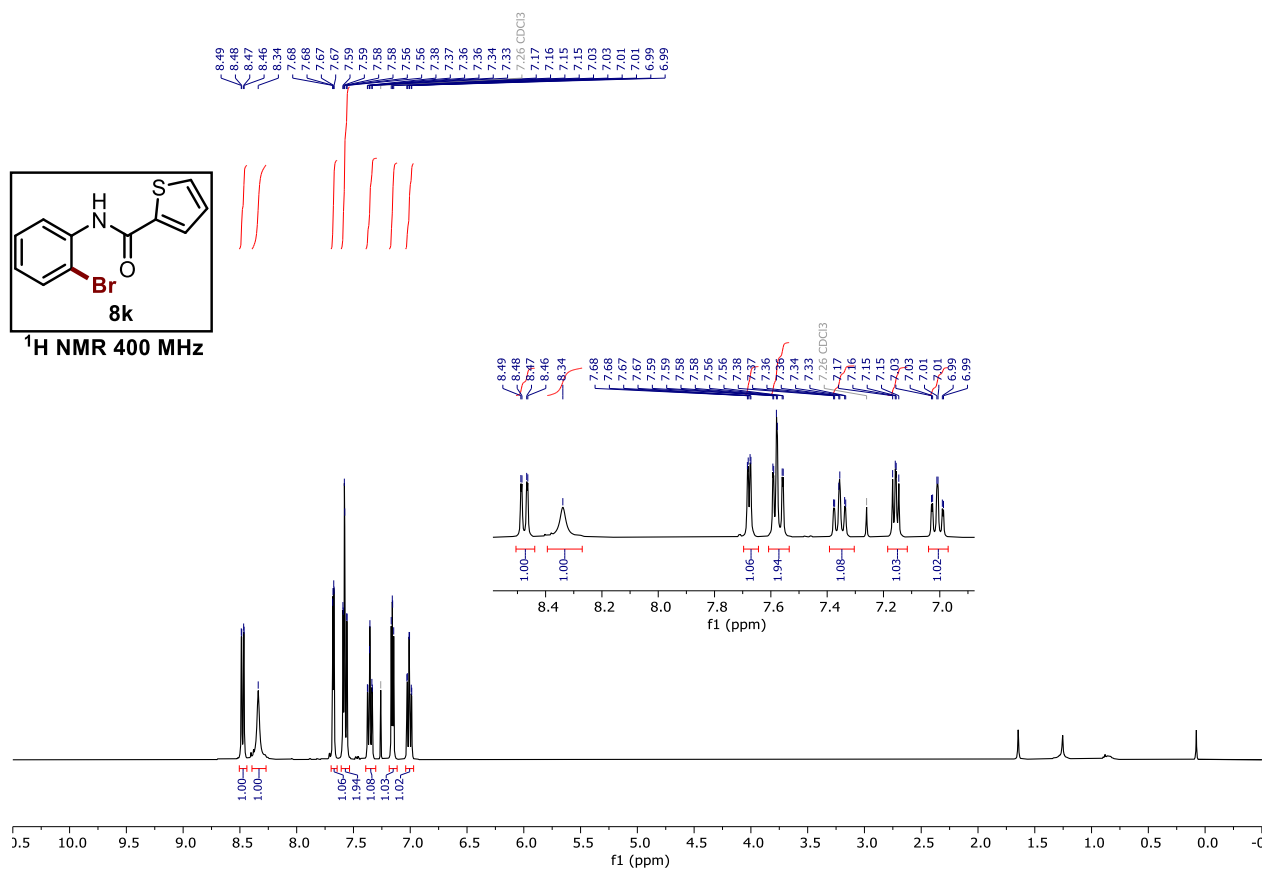

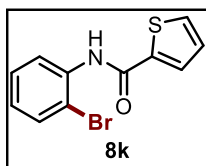

<sup>13</sup>C NMR 101 MHz

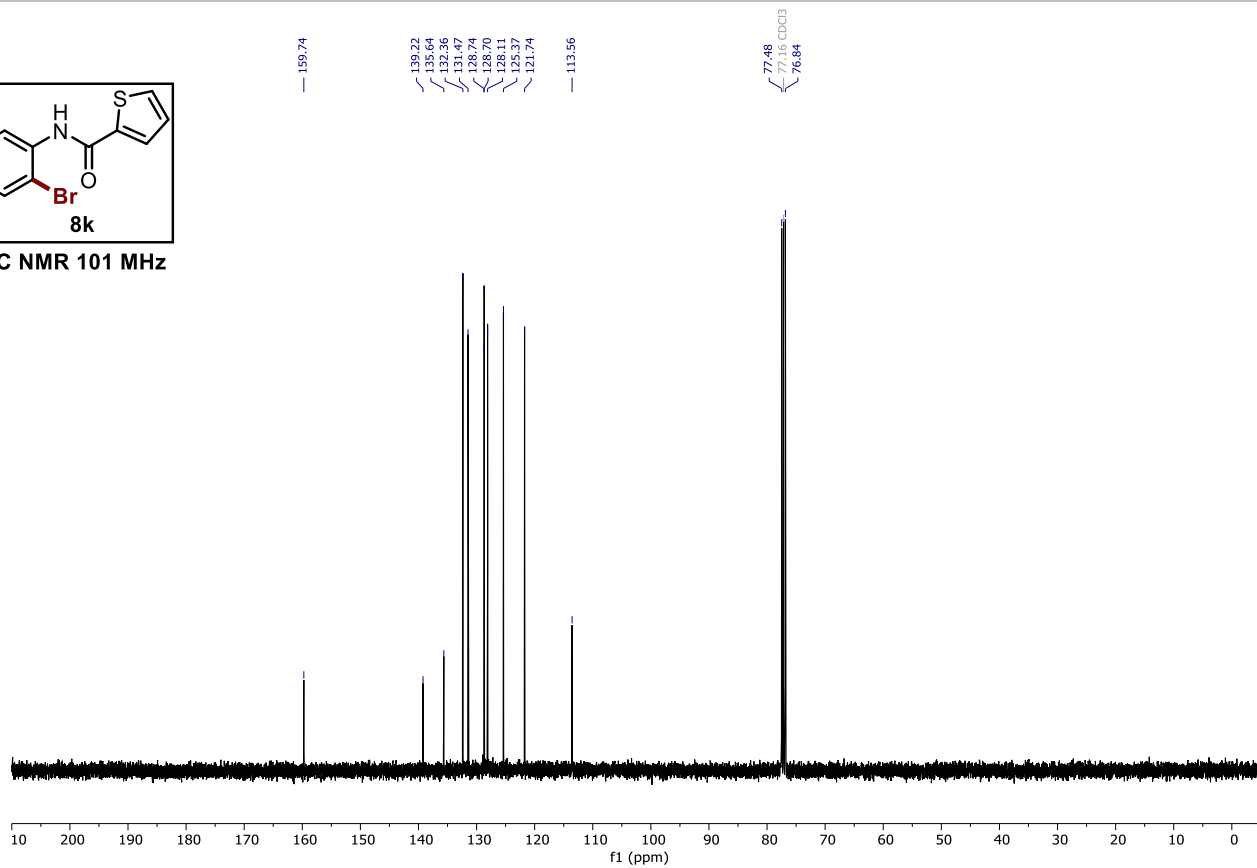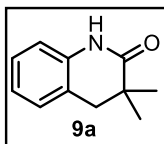

<sup>1</sup>H NMR 700 MHz

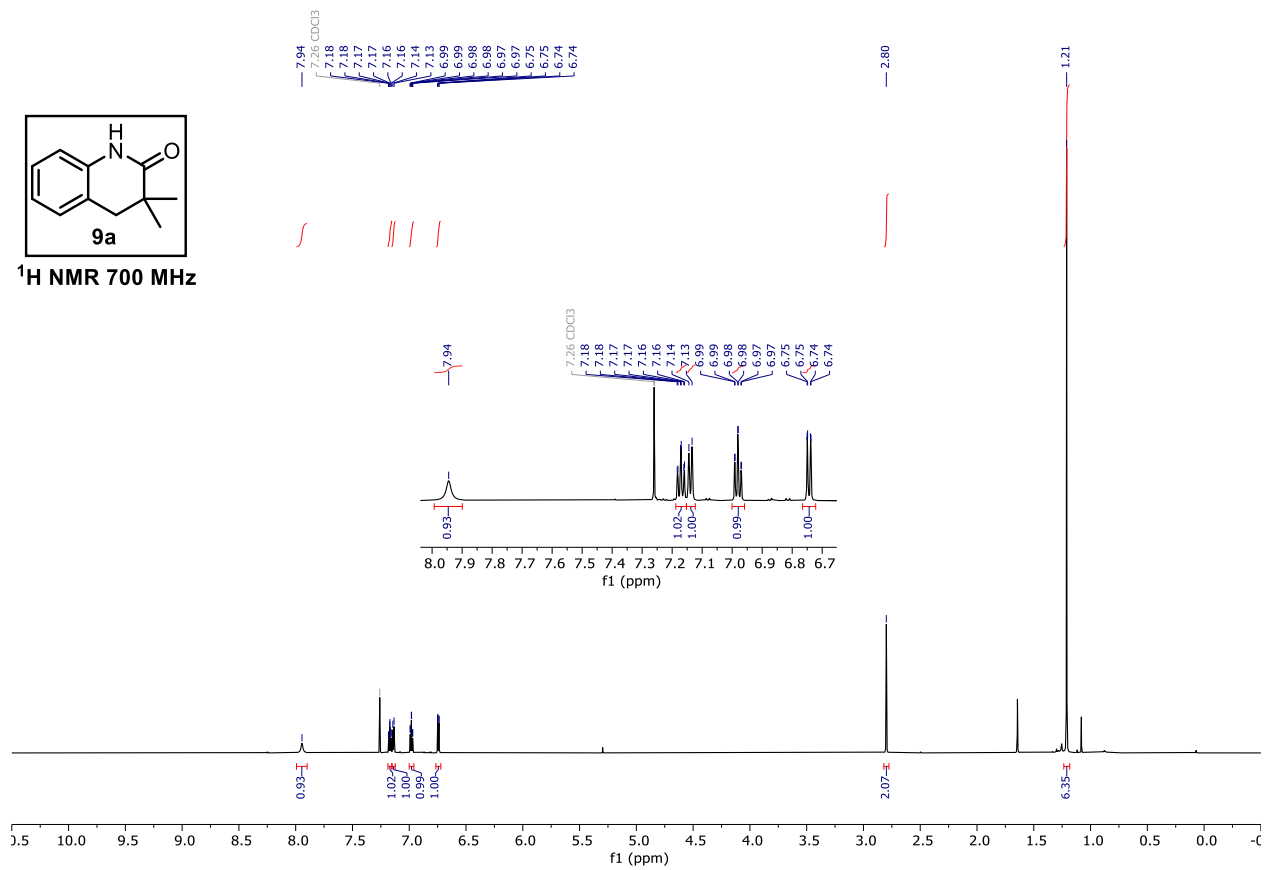

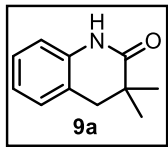

<sup>13</sup>C NMR 176 MHz

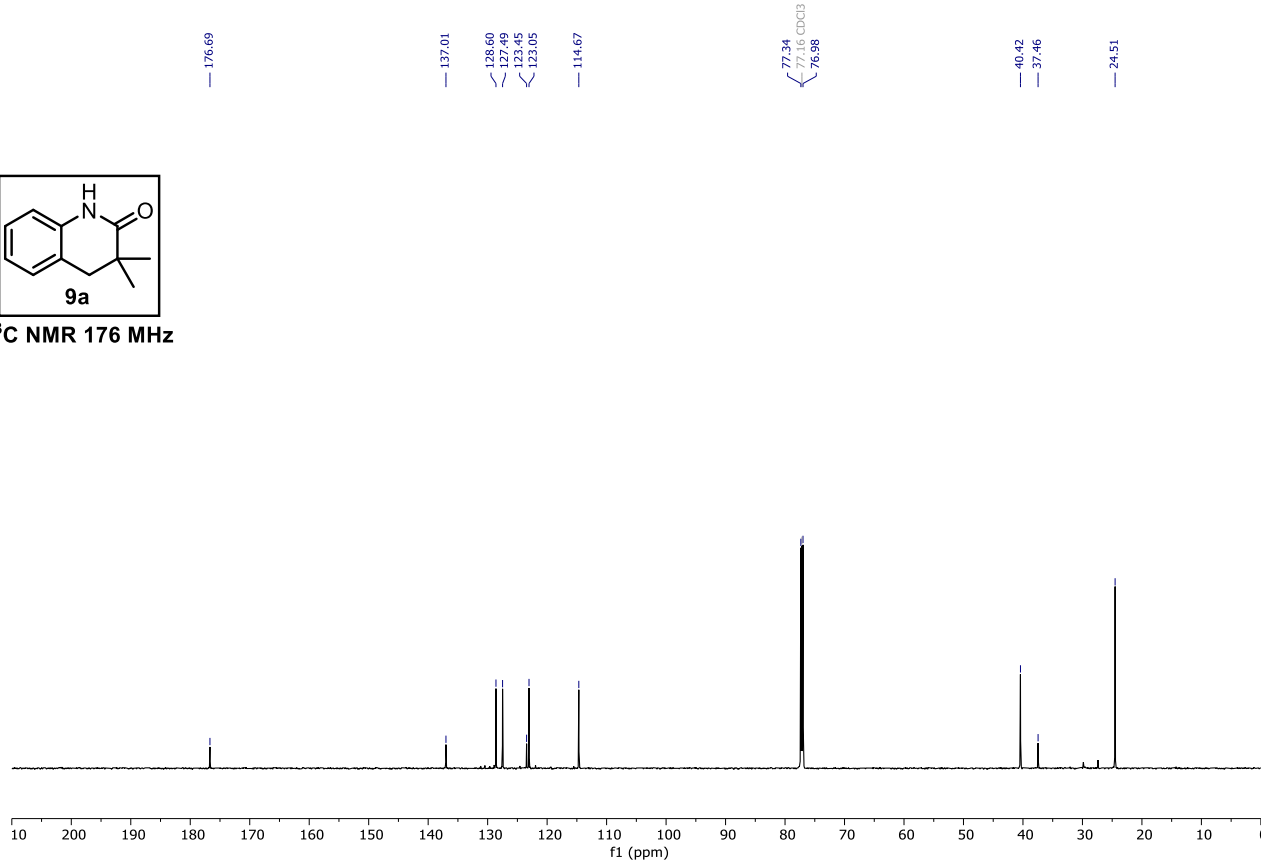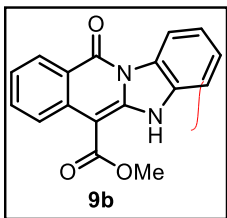

<sup>1</sup>H NMR 400 MHz

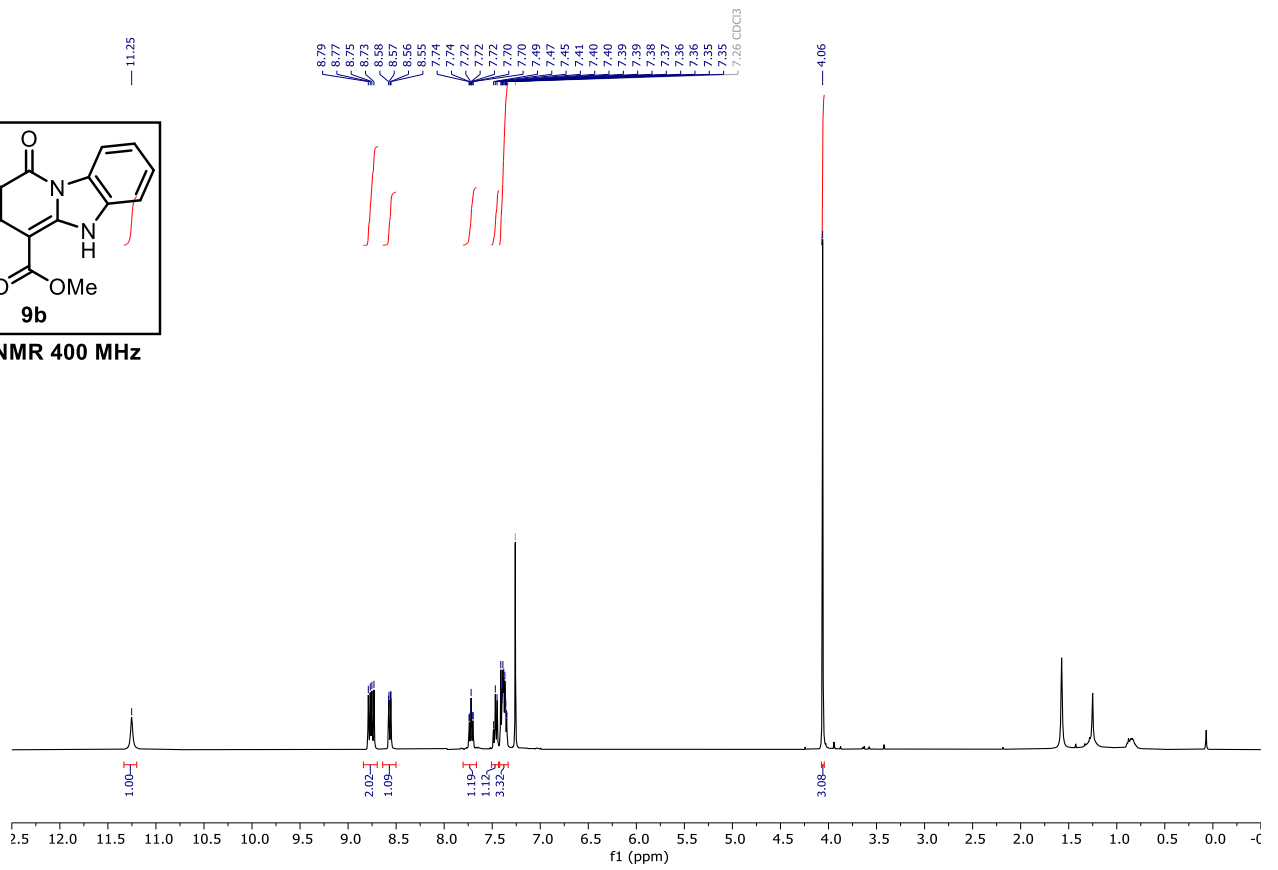

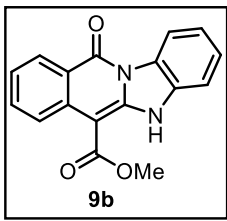

<sup>13</sup>C NMR 101 MHz

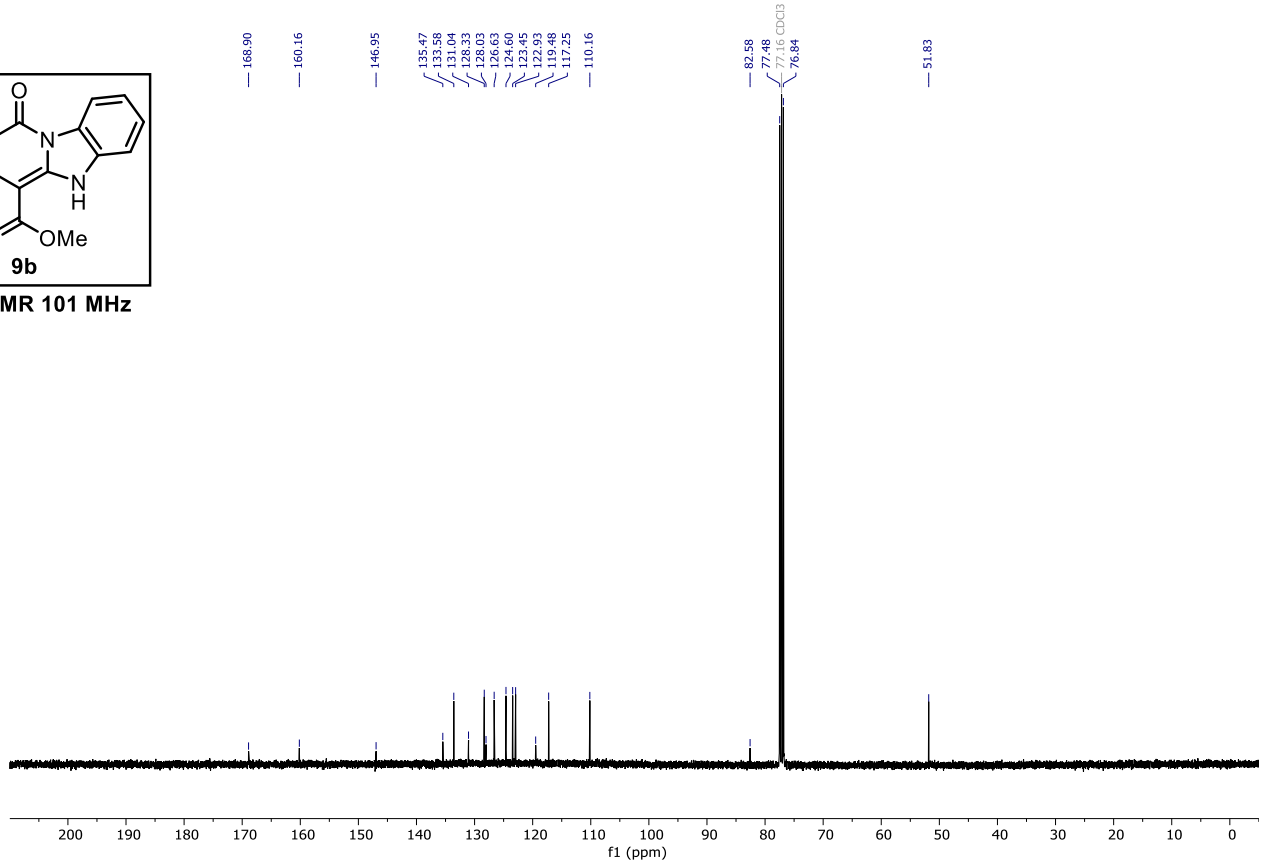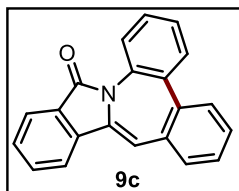

<sup>1</sup>H NMR 400 MHz

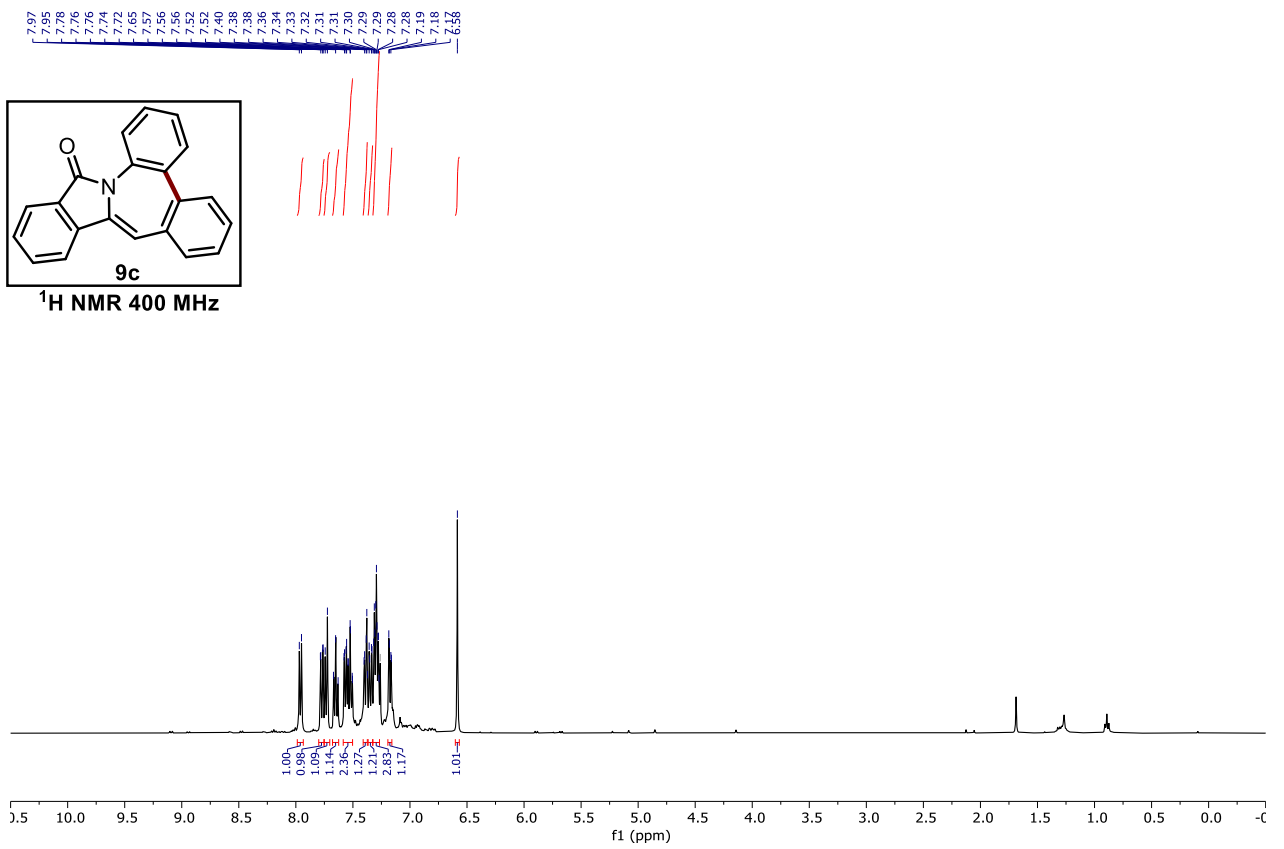

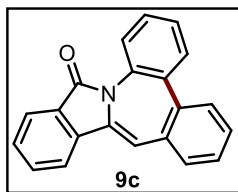

<sup>13</sup>C NMR 101 MHz

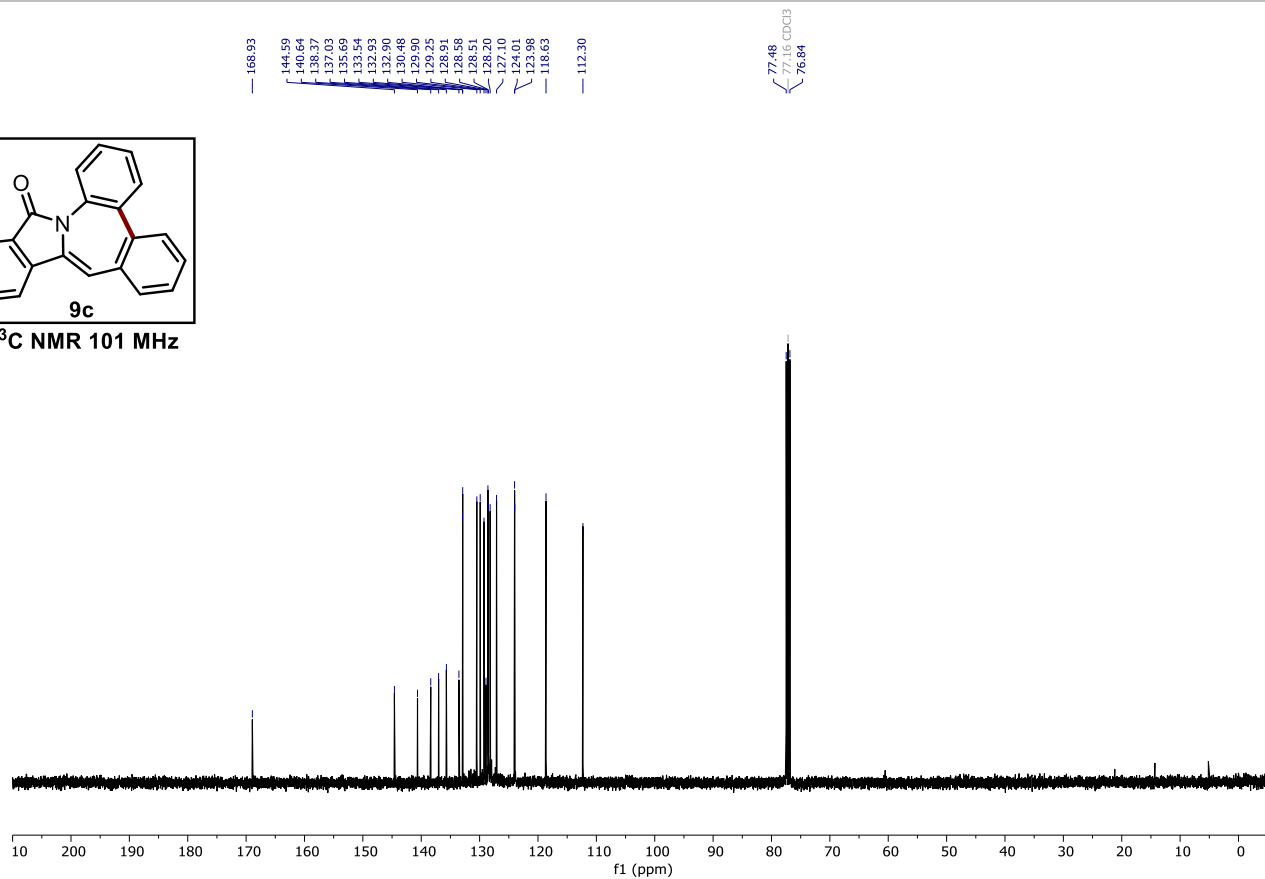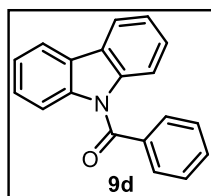

<sup>1</sup>H NMR 700 MHz

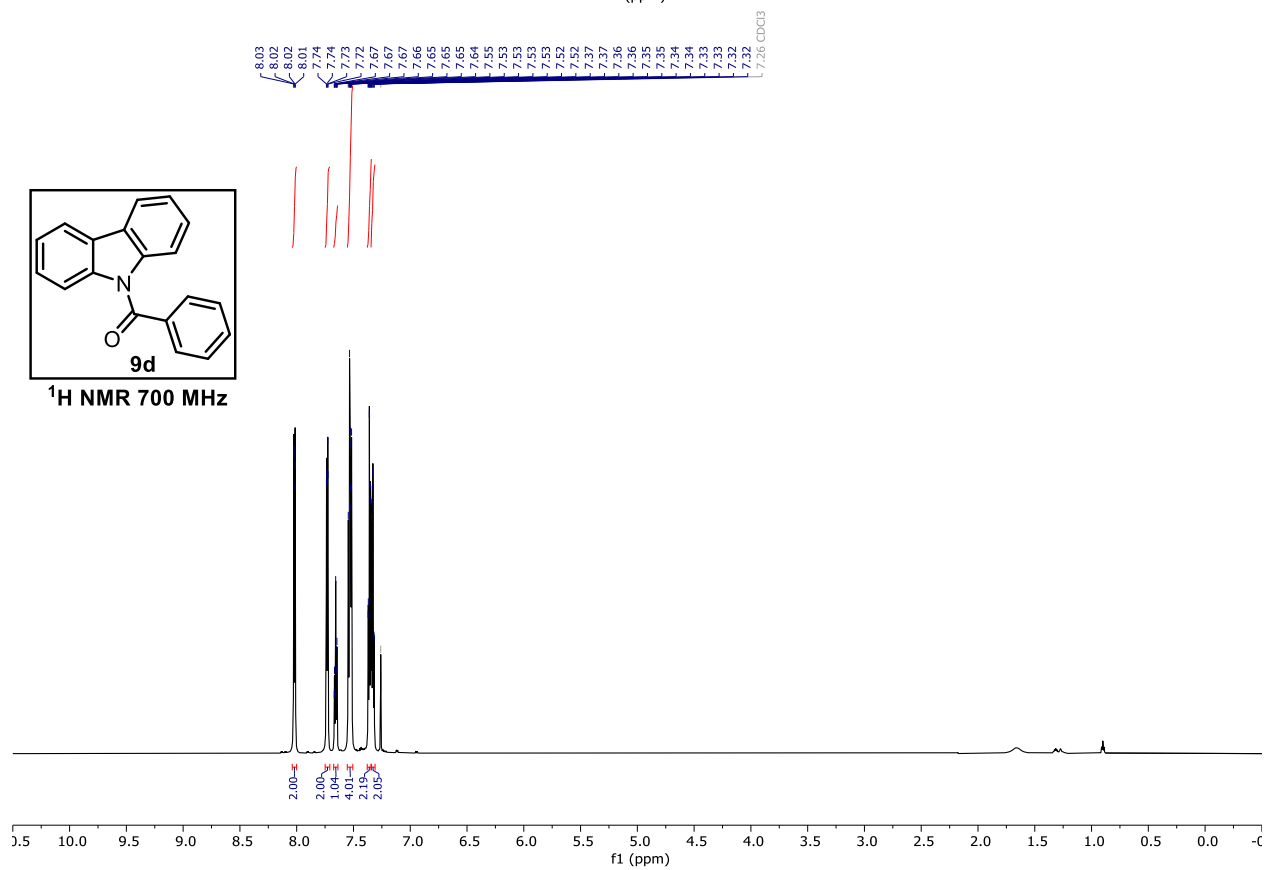

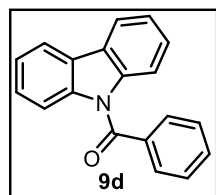

<sup>13</sup>C NMR 176 MHz

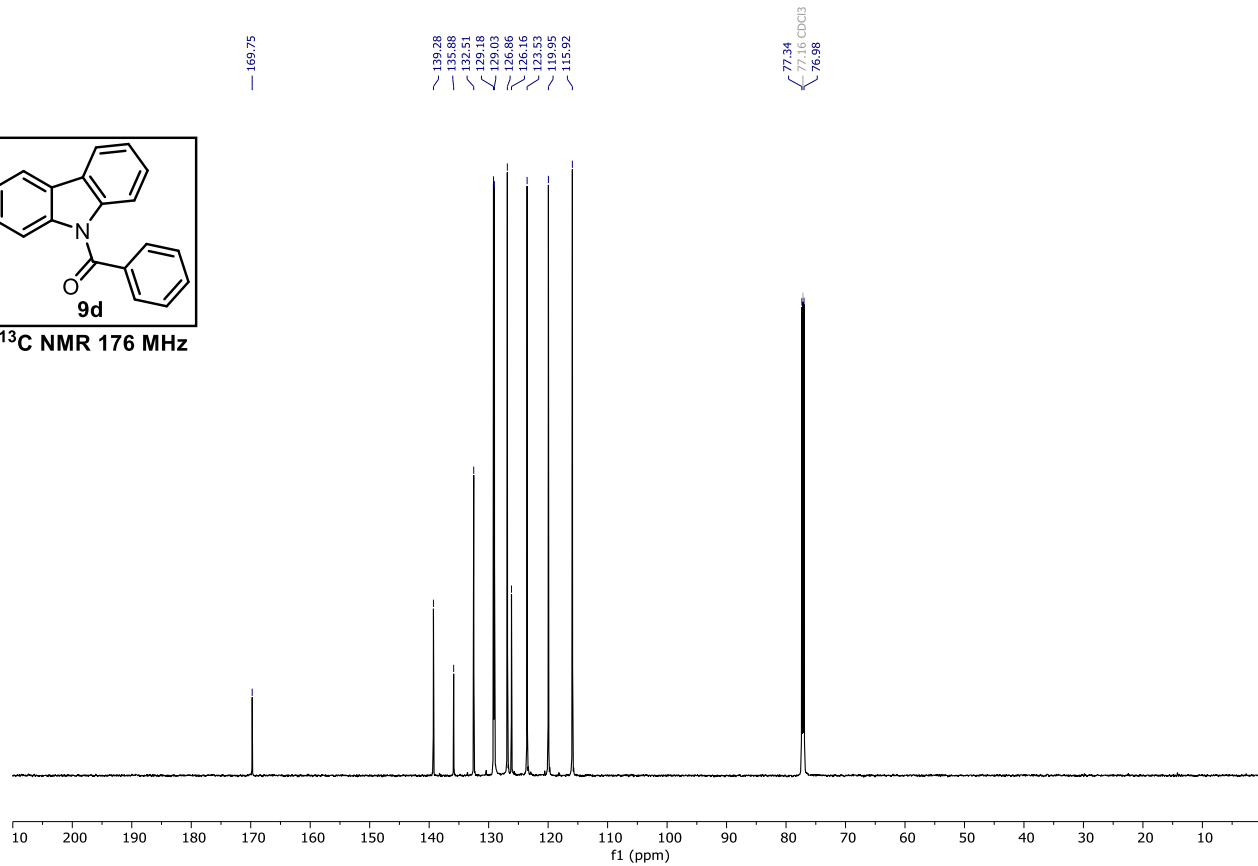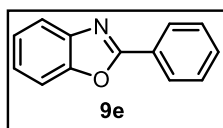

<sup>1</sup>H NMR 700 MHz

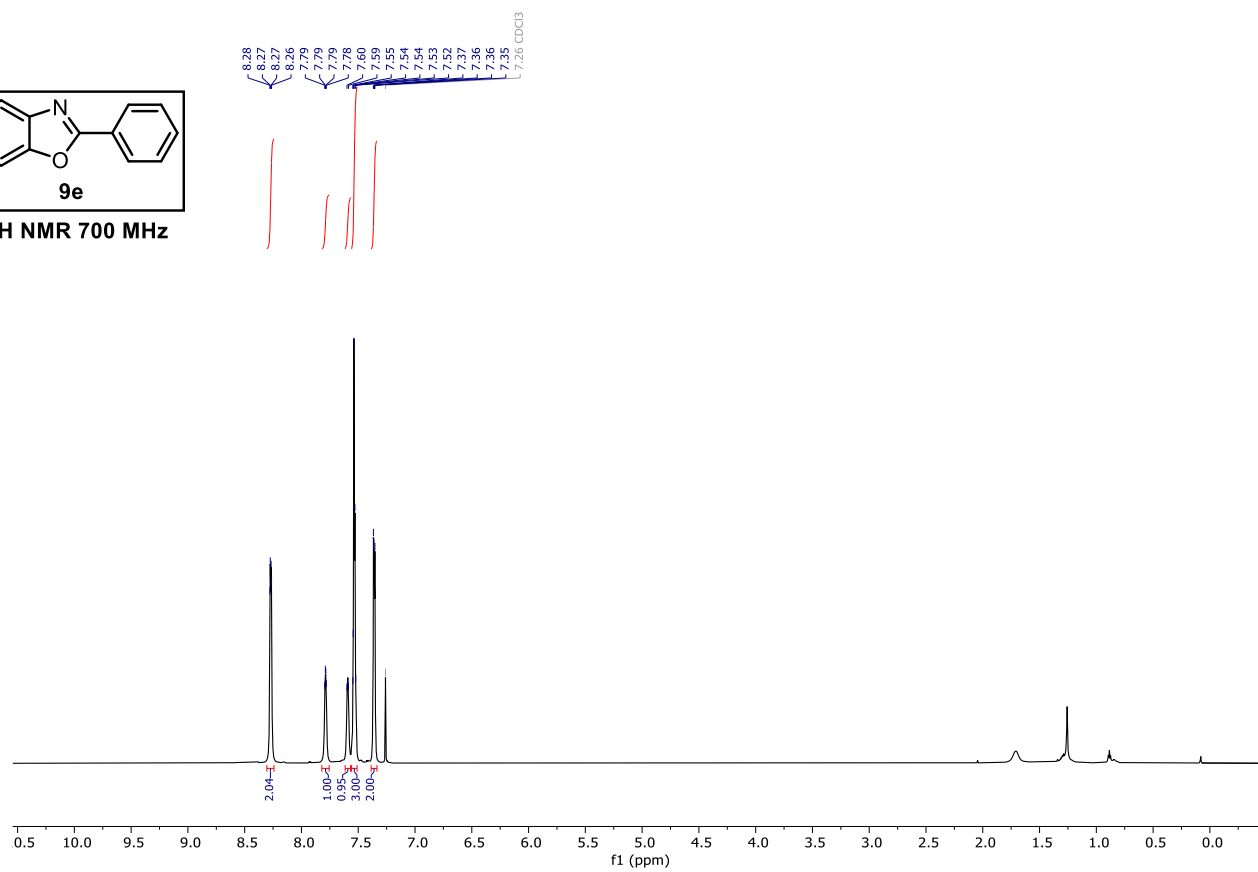





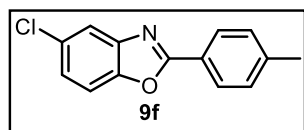

<sup>13</sup>C NMR 101 MHz

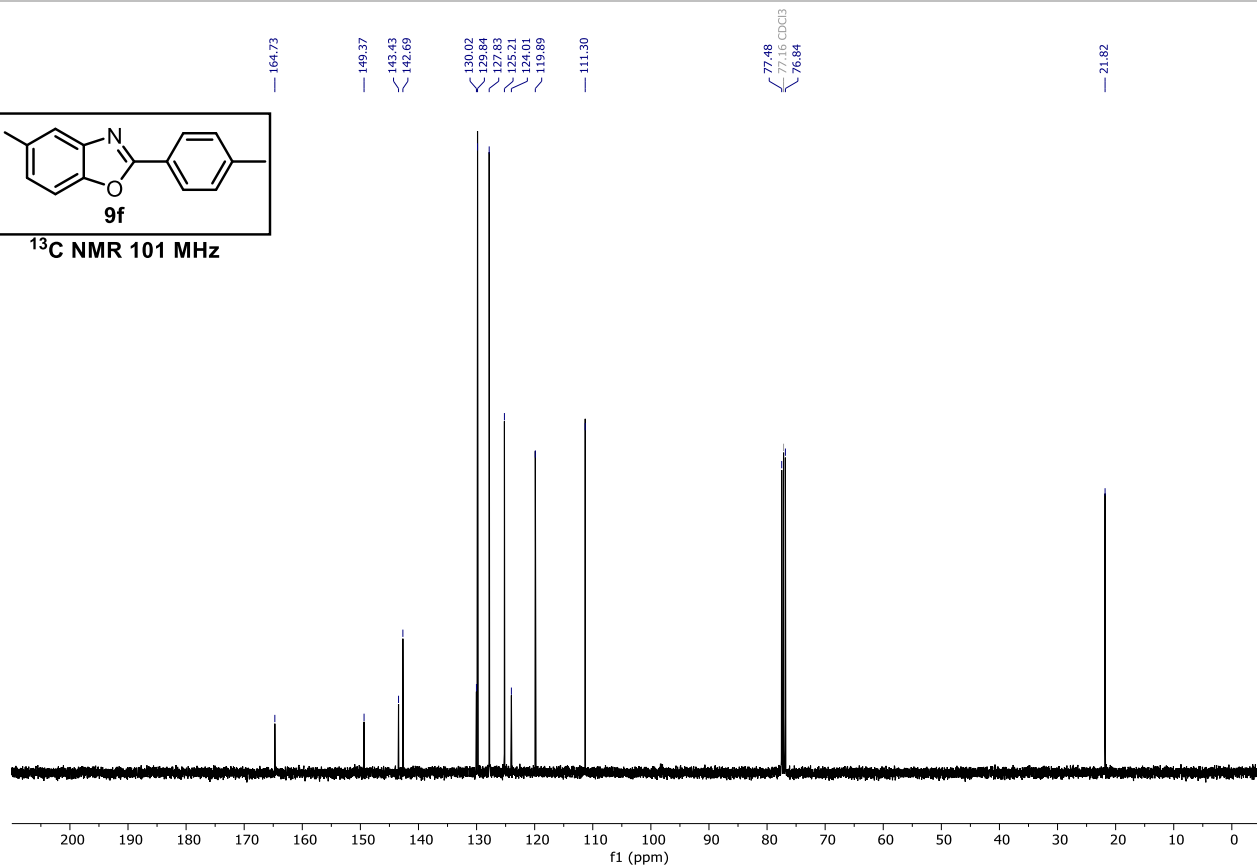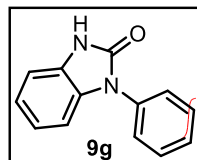

<sup>1</sup>H NMR 400 MHz

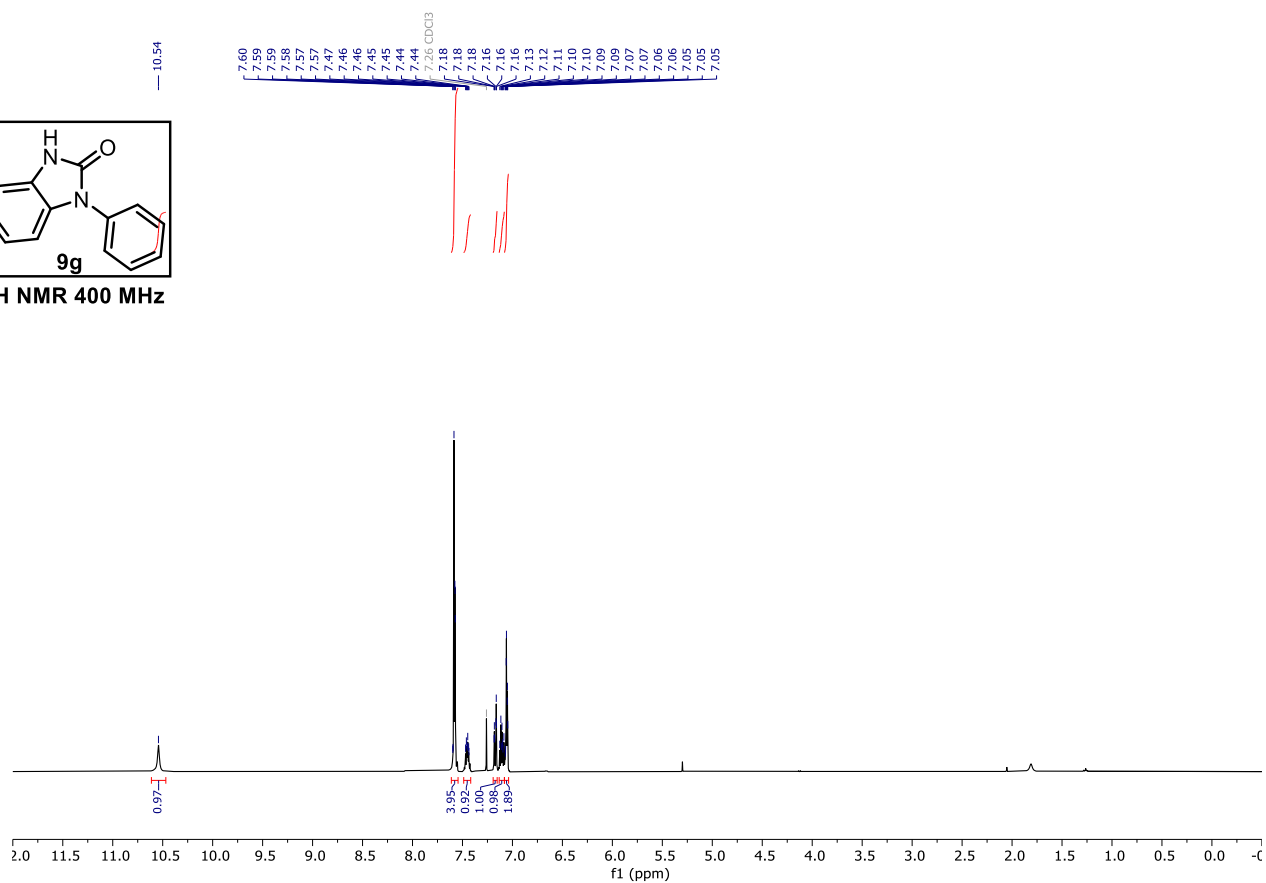



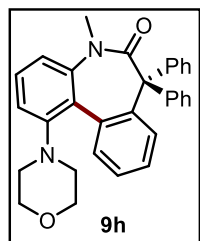

<sup>13</sup>C NMR 101 MHz

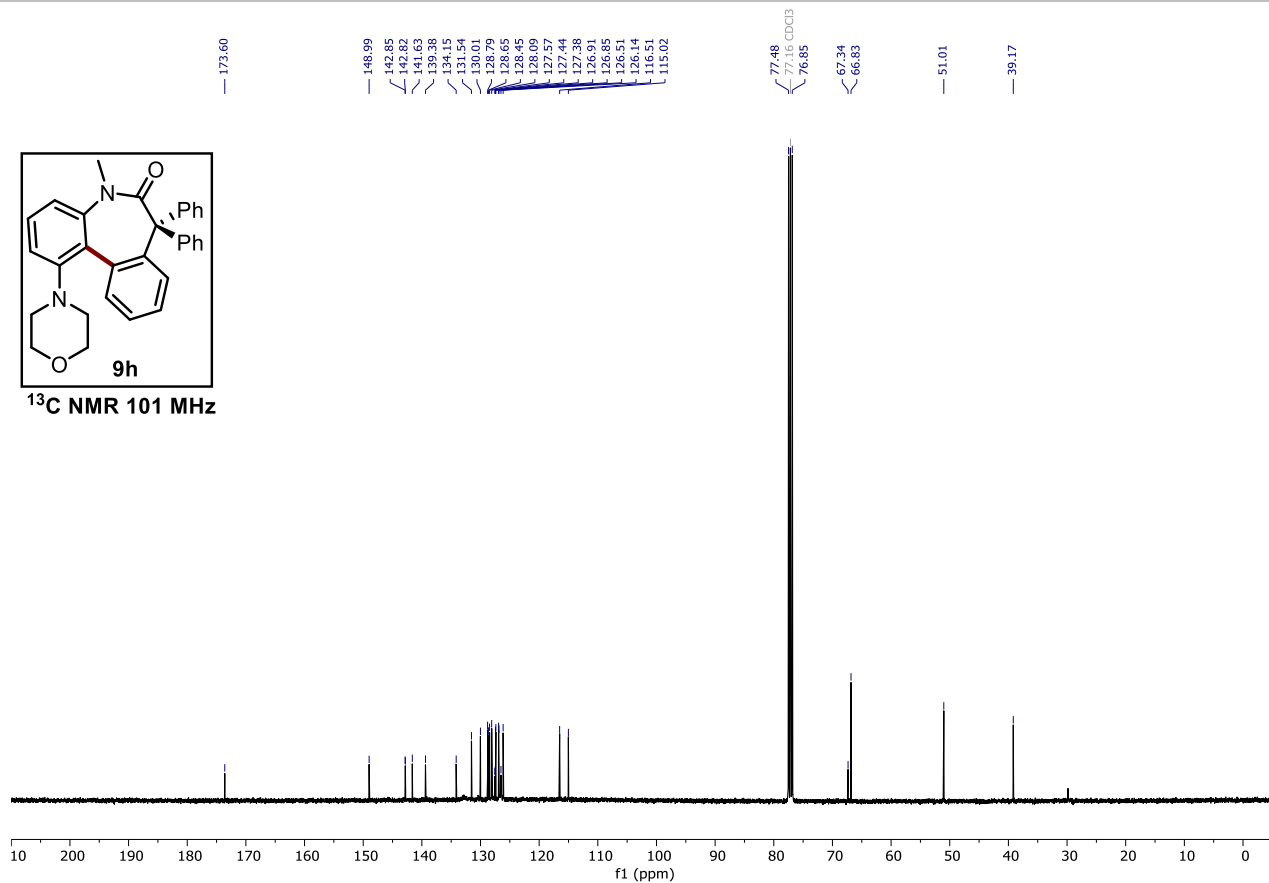

Supplement: SC-014-D3SC04628A-s001.pdf [file SC-014-D3SC04628A-s001.pdf]
